# Supplementary material for: Identification of HKDC1 and BACE2 as Genes Influencing Glycemic Traits During Pregnancy Through Genome-Wide Association Studies
Source: Oxford University Press journal article supplement (doi:10.2337/db12-1692), 2013-08-01
Supplement: db12-1692-supplementarytables.xlsx [file db12-1692-supplementarytables.xlsx]

## Sheet: Suppl_Table_1
Supplementary Table 1: Demographic Characteristics of HAPO Study Participants
		GWAS				Replication
Trait (units)		Hispanic	Afro-Caribbean	Thai	Northern European ancestry	Northern European ancestry
Pregnant women (N)		830	1126	1192	1380	2222
Gestational age at OGTT (weeks)	Mean	26.8984	27.0675	28.1536	28.5257	28.2411
	S.E.	0.0717929	0.0530819	0.0517837	0.0376476	0.0283689
Age at OGTT (years)	Mean	28.98	25.3681	27.7495	31.3347	30.823
	S.E.	0.189337	0.165077	0.159808	0.141856	0.112311
BMI at OGTT	Mean	30.1395	27.7299	25.6796	28.4598	28.5154
	S.E.	0.194621	0.181675	0.104985	0.129699	0.110954
Mean arterial pressure at OGTT (mmHg)	Mean	83.998	79.1978	79.7587	83.7879	83.1777
	S.E.	0.280211	0.230555	0.221587	0.207579	0.160618
Fasting plasma glucose (mg/dl)	Mean	84.0839	80.4405	79.9173	82.1309	82.2811
	S.E.	0.274293	0.227781	0.192315	0.18035	0.156013
1-hr plasma glucose (mg/dl)	Mean	137.572	122.725	147.993	132.029	133.352
	S.E.	1.21475	0.814405	0.907079	0.795001	0.66425
2-hr plasma glucose (mg/dl)	Mean	111.299	108.913	119.43	109.282	110.191
	S.E.	0.861206	0.667579	0.725645	0.584683	0.515927
Gestational age at delivery (weeks)	Mean	39.2699	39.3209	38.9541	39.5595	39.4886
	S.E.	0.0420133	0.0382178	0.0370139	0.0324785	0.025291
Maternal smoking during pregnancy (%)		0.00240964	0.0044405	0.00671141	0.134783	0.120162
Male offspring (%)		0.520482	0.522202	0.490772	0.498551	0.519352
Primiparous births (%)		0.590361	0.746892	0.876678	0.863043	0.841584

## Sheet: Suppl_Table _2
Supplementary Table 2: HAPO Sampling Location & Counts
	GWAS				Replication
Location	Hispanic	Afro-Caribbean	Thai	Northern European ancestry	Northern European ancestry
Bellflower, CA USA	830				60
Bridgetown, Barbados		1126			0
Bangkok, Thailand			1192
Belfast, UK				450	422
Manchester, UK					516
Newcastle/Brisbane, Australia				315	402
Toronto, ON, Canada				615	320
Cleveland, OH USA					216
Providence, RI USA					37
Chicago, IL USA					249

## Sheet: Suppl_Table_3
Supplementary Table 3: Summary of DNA samples and genotyping instances (scans).
	Afro-Carib		European Ancestry		Hispanic		Thai
Category	Study	HapMap	Study	HapMap	Study	HapMap	Study	HapMap
DNA samples into genotyping production	2581	27	3152	33	1615	16	2466	50
Failed genotyping	-180	-1	-164	0	-93	0	-31	0
Scans release by genotyping center	2401	26	2955	33	1506	16	2435	50
Sample identity issues	-28	0	-47	0	-8	0	0	0
Scans to post on dbGap	2373	26	2908	33	1498	16	2435	50
Sample quality issues	-80	0	-104	-2	0	0	0	0
Non-cohort specific self-identified ethnicity	-15	0	-7	0	0	0	0	0
Filtered scans for analysis	2278	26	2797	31	1498	16	2435	50

## Sheet: Suppl_Table_4
Supplementary Table 4: Summary of SNPs attempted, and filtered from the analysis.
	Afro-Caribbean		European Ancestry		Hispanic		Thai
Filter	SNPs kept	SNPs lost	SNPs kept	SNPs lost	SNPs kept	SNPs lost	SNPs kept	SNPs lost
Probes attempted	1199187	0	592532	0	1154691	0	1016423	0
Intensity only probes	1154691	44496	592532	0	1154691	0	1001455	14968
Genotyping center technical filters	1072348	82343	572316	20216	1116048	38643	1001450	5
MAF=0 for all samples	1027739	44609	567113	5203	1090317	25731	887416	114034
call rate < 98%	1021553	6186	562054	5059	1043785	46532	862958	24458
>10 Mendelian errors	1015259	6294	560542	1512	1039574	4211	858931	4027
HWE p-value < 1e-4	1014036	1223	560217	325	1039305	269	858234	697
>0 discordant calls in 6 duplicate pairs	1013926	110	559739	478	1038795	497	857293	941
sex difference in heterozygosity > 0.3	1013925	1	559739	0	1038785	10	857293	0
Y chromosome probes	1013903	22	559739	0	1038697	88	857293	0
Percentage of SNP assays attempted	0.8781	0.1219	0.9447	0.0553	0.8995	0.1005	0.8434	0.1566
MAF < 2% in study participants used for association test on mothers	945994	67909	530749	28990	909013	129684	662622	194671
Percentage of SNP assays attempted for mother analysis	0.8193	0.1807	0.8957	0.1043	0.7872	0.2128	0.6519	0.3481

## Sheet: Suppl_Table_5
Supplementary Table 5: Cohort-specific HapMap Phase 3 populations used as reference panels for imputation
Afro-Caribbean	European Ancestry	Mexican-American	Thai
Utah residents of Northern and Western European ancestry (CEU)	Utah residents of Northern and Western European ancestry (CEU)	Utah residents of Northern and Western European ancestry (CEU)	Han Chinese from Beijing, China (CHB)
Toscani from Italia (TSI)	Toscani from Italia (TSI)	Toscani from Italia (TSI)	Japanese from Tokyo, Japan (JPT)
Yoruba in Ibadan, Nigeria (YRI)		Yoruba in Ibadan, Nigeria (YRI)
African ancestry in southwestern USA (ASW)		Los Angeles residents with Mexican Ancestry (MXL)
Maasai from Kinyawa, Kenya (MKK)		Maasai from Kinyawa, Kenya(MKK)
Luhya in Webuye, Kenya (LWK)		Han Chinese from Beijing, China (CHB)
		Gujarati Indians from Houston, Texas (GIH)
		Japanese from Tokyo, Japan (JPT)

## Sheet: Suppl_Table_6
Supplementary Table 6: Top Associations (P<1E-06 in any single ancestry cohort or any meta-analysis)
						GWAS																																Replication						Meta-Analyses
						Hispanic (N=817)								Afro-Caribbean (N=1075)								Northern European (N=1367)								Thai (N=1178)								Northern European (N=2192)						GWAS Populations (HI-AC-EU-TH)					Northern Europeans (GWAS + Replication)
Model	Trait	SNP	Chromo-some	Position	Gene or Flanking Genes	Effect Allele	Non-Effect Allele	Effect Allele Frequency	Beta	SE	P	Genotyped or Imputed	Imputation r2	Effect Allele	Non-Effect Allele	Effect Allele Frequency	Beta	SE	P	Genotyped or Imputed	Imputation r2	Effect Allele	Non-Effect Allele	Effect Allele Frequency	Beta	SE	P	Genotyped or Imputed	Imputation r2	Effect Allele	Non-Effect Allele	Effect Allele Frequency	Beta	SE	P	Genotyped or Imputed	Imputation r2	Effect Allele	Non-Effect Allele	Effect Allele Frequency	Beta	SE	P	Effect Allele	Non-Effect Allele	Zscore	P	Direction	Effect Allele
1	1HPG	rs7542858	1	41744838	EDN2 / HIVEP3	T	C	0.036108	0.13608	0.18713	0.46709	genotyped	1	T	C	0.075351	0.23081	0.051007	6.04e-06	genotyped	1	T	C	0.05962	0.02785	0.10262	0.78609	genotyped	1	T	C	0.13795	0.012169	0.07461	0.87044	genotyped	1	N/A	N/A	N/A	N/A	N/A	N/A	t	c	2.774	0.005537	++++	t
1	1HPG	rs11210344	1	41745467	EDN2 / HIVEP3	N/A	N/A	N/A	N/A	N/A	N/A	N/A	N/A	T	G	0.074129	0.24109	0.053138	5.7e-06	imputed	0.952	T	G	0.059704	0.038245	0.10327	0.71112	imputed	0.984	T	G	0.13804	0.0025121	0.074782	0.9732	imputed	0.99	N/A	N/A	N/A	N/A	N/A	N/A	t	g	2.719	0.006544	++?+	t
1	1HPG	rs10181739	2	85775063	GNLY	N/A	N/A	N/A	N/A	N/A	N/A	genotyped	NA	G	A	0.916764	0.22654	0.050131	6.21e-06	genotyped	1	N/A	N/A	N/A	N/A	N/A	N/A	N/A	N/A	N/A	N/A	N/A	N/A	N/A	N/A	N/A	N/A	N/A	N/A	N/A	N/A	N/A	N/A	a	g	-4.519	6.21e-06	-???	N/A
1	1HPG	rs13413829	2	85783719	GNLY / ATOH8	N/A	N/A	N/A	N/A	N/A	N/A	N/A	N/A	G	A	0.91718	0.22655	0.050339	6.78e-06	imputed	0.99	N/A	N/A	N/A	N/A	N/A	N/A	N/A	N/A	N/A	N/A	N/A	N/A	N/A	N/A	N/A	N/A	N/A	N/A	N/A	N/A	N/A	N/A	a	g	-4.501	6.78e-06	-???	N/A
1	1HPG	rs13383848	2	85786128	GNLY / ATOH8	N/A	N/A	N/A	N/A	N/A	N/A	N/A	N/A	T	C	0.914684	0.22483	0.049438	5.42e-06	imputed	0.991	N/A	N/A	N/A	N/A	N/A	N/A	N/A	N/A	N/A	N/A	N/A	N/A	N/A	N/A	N/A	N/A	N/A	N/A	N/A	N/A	N/A	N/A	t	c	4.548	5.42e-06	+???	N/A
1	1HPG	rs13422837	2	85788106	GNLY / ATOH8	N/A	N/A	N/A	N/A	N/A	N/A	N/A	N/A	T	C	0.914936	0.22604	0.049621	5.23e-06	imputed	0.988	N/A	N/A	N/A	N/A	N/A	N/A	N/A	N/A	N/A	N/A	N/A	N/A	N/A	N/A	genotyped	NA	N/A	N/A	N/A	N/A	N/A	N/A	t	c	4.555	5.23e-06	+???	N/A
1	1HPG	rs7592198	2	124595577	CNTNAP5	T	C	0.40698	0.023423	0.071586	0.74352	genotyped	1	T	C	0.67674	0.01623	0.029736	0.58519	genotyped	1	T	C	0.54638	-0.23125	0.050075	3.87e-06	imputed	0.975	T	C	0.58447	0.045586	0.051687	0.3778	genotyped	1	C	T	0.468	-0.02417	0.04092	0.5548	t	c	-1.7	0.08917	+-++	t
1	1HPG	rs3769185	2	173721745	ZAK	G	A	0.57222	0.079895	0.069873	0.25286	genotyped	1	G	A	0.14047	0.18185	0.039322	3.75e-06	genotyped	1	G	A	0.51317	0.065761	0.049611	0.18499	genotyped	1	G	A	0.42105	-0.012206	0.050315	0.80832	genotyped	1	N/A	N/A	N/A	N/A	N/A	N/A	a	g	-3.378	0.0007307	---+	a
1	1HPG	rs3769184	2	173728166	ZAK	G	A	0.62179	0.081146	0.07245	0.2627	genotyped	1	G	A	0.17442	0.17685	0.03708	1.85e-06	genotyped	1	G	A	0.59583	0.093272	0.050276	0.063567	genotyped	1	G	A	0.42992	-0.0094846	0.051727	0.85452	imputed	0.942	N/A	N/A	N/A	N/A	N/A	N/A	a	g	-3.764	0.0001675	---+	a
1	1HPG	rs1837470	2	173756617	ZAK	G	A	0.48715	0.11459	0.070438	0.10377	genotyped	1	G	A	0.16651	0.18187	0.038077	1.78e-06	genotyped	1	G	A	0.57376	0.10435	0.05042	0.038496	imputed	0.989	G	A	0.42402	-0.001803	0.05035	0.97143	genotyped	1	N/A	N/A	N/A	N/A	N/A	N/A	a	g	-4.179	2.92e-05	---+	a
1	1HPG	rs7590028	2	180257688	ZNF385B	G	A	0.46022	0.024917	0.067519	0.71211	genotyped	1	G	A	0.51349	0.12672	0.026861	2.39e-06	genotyped	1	G	A	0.53038	0.028163	0.048556	0.56191	genotyped	1	G	A	0.66171	-0.055103	0.053096	0.29936	genotyped	1	N/A	N/A	N/A	N/A	N/A	N/A	a	g	-2.268	0.02335	---+	a
1	1HPG	rs932115	2	180258731	ZNF385B	C	A	0.46393	0.022758	0.068751	0.74063	imputed	0.97	C	A	0.5196	0.12902	0.0274	2.49e-06	imputed	0.966	C	A	0.5271	0.031988	0.049913	0.52161	imputed	0.946	C	A	0.6612	-0.054563	0.053332	0.30627	imputed	0.988	N/A	N/A	N/A	N/A	N/A	N/A	a	c	-2.288	0.02211	---+	a
1	1HPG	rs1515289	2	180259909	ZNF385B	T	C	0.50708	-0.027685	0.067826	0.68314	imputed	0.994	T	C	0.4445	-0.12931	0.027909	3.6e-06	imputed	0.955	T	C	0.44022	-0.039922	0.050666	0.43073	imputed	0.9	T	C	0.33433	0.050568	0.052996	0.33999	imputed	0.997	N/A	N/A	N/A	N/A	N/A	N/A	t	c	-2.401	0.01633	---+	t
1	1HPG	rs4327185	2	211472829	CPS1 / ERBB4	T	C	0.74359	-0.17177	0.079604	0.030944	imputed	0.993	T	C	0.64385	-0.070234	0.02948	0.017198	imputed	0.945	T	C	0.86654	-0.11988	0.072701	0.099146	imputed	0.973	T	C	0.42935	-0.14514	0.050835	0.0043013	imputed	0.986	N/A	N/A	N/A	N/A	N/A	N/A	t	c	-4.485	7.29e-06	----	t
1	1HPG	rs4362497	2	211480823	CPS1 / ERBB4	T	A	0.25558	0.17203	0.079602	0.030686	imputed	0.998	T	A	0.34591	0.067844	0.029426	0.021134	imputed	0.957	T	A	0.13141	0.11877	0.072565	0.10168	imputed	0.991	T	A	0.56237	0.15097	0.051778	0.0035491	imputed	0.943	N/A	N/A	N/A	N/A	N/A	N/A	a	t	-4.473	7.71e-06	----	a
1	1HPG	rs4438425	2	211489454	CPS1 / ERBB4	T	C	0.73882	-0.18305	0.079655	0.021556	imputed	0.991	T	C	0.69555	-0.065318	0.031135	0.035915	imputed	0.913	T	C	0.86786	-0.12364	0.072197	0.086796	imputed	0.995	T	C	0.43241	-0.14739	0.050981	0.0038385	imputed	0.972	N/A	N/A	N/A	N/A	N/A	N/A	t	c	-4.459	8.23e-06	----	t
1	1HPG	rs4635463	2	211489483	CPS1 / ERBB4	T	C	0.73853	-0.1831	0.079698	0.021599	imputed	0.989	T	C	0.69985	-0.06448	0.031149	0.038447	imputed	0.93	T	C	0.86798	-0.12367	0.072233	0.086887	imputed	0.995	T	C	0.4347	-0.14774	0.051174	0.0038894	imputed	0.964	N/A	N/A	N/A	N/A	N/A	N/A	t	c	-4.443	8.89e-06	----	t
1	1HPG	rs4611592	2	211494924	CPS1 / ERBB4	G	A	0.25598	0.18493	0.080559	0.0217	imputed	0.98	G	A	0.29082	0.067721	0.031371	0.030873	imputed	0.942	G	A	0.12558	0.12958	0.073842	0.079297	imputed	0.995	G	A	0.56632	0.1471	0.050745	0.0037464	imputed	0.986	N/A	N/A	N/A	N/A	N/A	N/A	a	g	-4.515	6.33e-06	----	a
1	1HPG	rs4580326	2	211513096	CPS1 / ERBB4	T	C	0.7505	-0.20749	0.08251	0.01191	imputed	0.949	T	C	0.70263	-0.066733	0.03119	0.032389	imputed	0.95	T	C	0.86211	-0.11628	0.070942	0.10119	imputed	0.966	T	C	0.431	-0.14045	0.051088	0.0059738	imputed	0.975	N/A	N/A	N/A	N/A	N/A	N/A	t	c	-4.459	8.25e-06	----	t
1	1HPG	rs13006521	2	211521377	CPS1 / ERBB4	G	A	0.74725	-0.21186	0.080288	0.0083214	genotyped	1	G	A	0.70605	-0.068731	0.030649	0.024929	genotyped	1	G	A	0.86979	-0.11596	0.072076	0.10765	genotyped	1	G	A	0.42784	-0.13145	0.050534	0.0092921	genotyped	1	N/A	N/A	N/A	N/A	N/A	N/A	a	g	4.469	7.85e-06	++++	a
1	1HPG	rs809949	2	211538441	CPS1 / ERBB4	T	C	0.18633	0.29747	0.090365	0.00099518	imputed	0.981	T	C	0.269	0.077039	0.032334	0.01719	imputed	0.936	T	C	0.02329	0.2051	0.16248	0.20684	imputed	0.974	T	C	0.55224	0.1231	0.051885	0.017668	imputed	0.934	N/A	N/A	N/A	N/A	N/A	N/A	t	c	4.508	6.53e-06	++++	t
1	1HPG	rs2687194	3	60392170	FHIT	G	C	0.49266	-0.20612	0.071513	0.0039484	imputed	0.922	N/A	N/A	N/A	N/A	N/A	N/A	N/A	N/A	N/A	N/A	N/A	N/A	N/A	N/A	N/A	N/A	G	C	0.50015	-0.17567	0.050112	0.00045576	imputed	0.97	N/A	N/A	N/A	N/A	N/A	N/A	c	g	4.538	5.67e-06	??++	N/A
1	1HPG	rs2087038	4	72130452	DCK / LOC727995	G	A	0.17721	0.41097	0.091363	6.85e-06	imputed	0.994	G	A	0.61177	0.013026	0.027655	0.63763	imputed	0.996	G	A	0.28254	-0.039701	0.054842	0.46912	imputed	0.999	G	A	0.18884	-0.066204	0.06499	0.30836	imputed	0.987	N/A	N/A	N/A	N/A	N/A	N/A	a	g	-1.235	0.2167	-+-+	a
1	1HPG	rs10033340	4	72135655	DCK / LOC727995	T	G	0.17625	0.41077	0.091277	6.79e-06	genotyped	1	T	G	0.60605	0.0064275	0.027666	0.81629	genotyped	1	T	G	0.28237	-0.039837	0.054825	0.46746	genotyped	1	T	G	0.18841	-0.065566	0.064899	0.31236	imputed	0.992	N/A	N/A	N/A	N/A	N/A	N/A	t	g	1.122	0.262	+-+-	t
1	1HPG	rs12108641	4	111188048	ELOVL6	T	G	0.064871	-0.26449	0.14368	0.065643	genotyped	1	T	G	0.13907	-0.13313	0.039876	0.00084239	genotyped	1	T	G	0.10935	-0.19684	0.076058	0.0096522	genotyped	1	N/A	N/A	N/A	N/A	N/A	N/A	genotyped	NA	N/A	N/A	N/A	N/A	N/A	N/A	t	g	-4.515	6.32e-06	---?	t
1	1HPG	rs13117227	4	163274178	FSTL5	T	A	0.12723	-0.018786	0.10508	0.85811	imputed	0.941	N/A	N/A	N/A	N/A	N/A	N/A	N/A	N/A	N/A	N/A	N/A	N/A	N/A	N/A	N/A	N/A	T	A	0.090064	-0.40172	0.090682	9.43e-06	imputed	0.961	N/A	N/A	N/A	N/A	N/A	N/A	a	t	3.518	0.000434	??++	N/A
1	1HPG	rs10068942	5	7579847	ADCY2	T	C	0.38248	0.31667	0.071255	8.82e-06	imputed	0.98	N/A	N/A	N/A	N/A	N/A	N/A	N/A	N/A	T	C	0.52169	0.010983	0.048986	0.8226	imputed	0.973	T	C	0.58891	-0.020916	0.05136	0.68383	imputed	0.998	N/A	N/A	N/A	N/A	N/A	N/A	t	c	2.093	0.03638	?++-	t
1	1HPG	rs6555474	5	7582813	ADCY2	G	A	0.61689	-0.31356	0.070448	8.55e-06	genotyped	1	G	A	0.78558	-0.00020225	0.033593	0.9952	genotyped	1	G	A	0.4722	-0.010798	0.048425	0.82355	imputed	0.998	G	A	0.41384	0.015148	0.051207	0.76737	genotyped	1	N/A	N/A	N/A	N/A	N/A	N/A	a	g	1.884	0.05953	+++-	a
1	1HPG	rs1553245	5	7587899	ADCY2	G	C	0.38074	0.31379	0.070802	9.34e-06	imputed	1	G	C	0.21442	0.00020425	0.033593	0.99515	imputed	1	G	C	0.52081	0.01513	0.048323	0.7542	imputed	1	G	C	0.58831	-0.015869	0.051356	0.75732	imputed	0.998	N/A	N/A	N/A	N/A	N/A	N/A	c	g	-1.919	0.05495	---+	c
1	1HPG	rs9360368	6	69724522	BAI3	G	C	0.46139	0.10341	0.070324	0.14143	imputed	0.985	G	C	0.33098	-0.028789	0.030809	0.35008	imputed	0.929	G	C	0.30411	-0.24714	0.054147	5.02e-06	imputed	0.925	G	C	0.62441	-0.022515	0.053086	0.67148	imputed	0.986	N/A	N/A	N/A	N/A	N/A	N/A	c	g	2.581	0.009856	++-+	c
1	1HPG	rs3757043	6	69726863	BAI3	G	C	0.55355	-0.099002	0.073809	0.17981	imputed	0.909	N/A	N/A	N/A	N/A	N/A	N/A	N/A	N/A	G	C	0.69724	0.24545	0.054334	6.26e-06	imputed	0.921	G	C	0.38098	0.026996	0.053526	0.61401	imputed	0.952	N/A	N/A	N/A	N/A	N/A	N/A	c	g	-2.518	0.01181	?-+-	c
1	1HPG	rs3798971	6	69728760	BAI3	G	A	0.32743	0.061546	0.07528	0.41361	genotyped	1	G	A	0.13675	-0.0070053	0.040692	0.86332	genotyped	1	G	A	0.30614	-0.2388	0.052689	5.84e-06	genotyped	1	G	A	0.63073	0.034018	0.05243	0.51646	genotyped	1	N/A	N/A	N/A	N/A	N/A	N/A	a	g	1.915	0.05546	++--	a
1	1HPG	rs1730908	7	22001763	CDCA7L / RAPGEF5	T	C	0.26132	0.15103	0.078089	0.053105	genotyped	1	T	C	0.38	-0.0068591	0.028748	0.81142	genotyped	1	T	C	0.22019	0.27569	0.060155	4.58e-06	genotyped	1	T	C	0.074669	-0.26719	0.09732	0.0060427	genotyped	0.999	N/A	N/A	N/A	N/A	N/A	N/A	t	c	1.842	0.06552	-++-	t
1	1HPG	rs2527703	7	22002000	CDCA7L / RAPGEF5	C	A	0.74045	-0.15386	0.078341	0.049532	imputed	0.985	N/A	N/A	N/A	N/A	N/A	N/A	N/A	N/A	C	A	0.78371	-0.28488	0.061986	4.31e-06	imputed	0.95	C	A	0.924192	0.30318	0.10143	0.0027974	imputed	0.928	N/A	N/A	N/A	N/A	N/A	N/A	a	c	2.129	0.03323	?++-	a
1	1HPG	rs2629051	7	95268213	DYNC1I1	C	A	0.10522	0.16167	0.12025	0.17879	imputed	0.944	C	A	0.17774	-0.16147	0.036472	9.54e-06	imputed	0.99	C	A	0.096328	-0.036874	0.08549	0.66623	imputed	0.973	C	A	0.096985	0.05527	0.08795	0.52973	imputed	0.975	N/A	N/A	N/A	N/A	N/A	N/A	a	c	1.518	0.129	++--	a
1	1HPG	rs2618971	7	95269576	DYNC1I1	T	C	0.89834	-0.14229	0.11902	0.23191	genotyped	0.999	T	C	0.82368	0.16135	0.036405	9.33e-06	genotyped	1	T	C	0.9054	0.037748	0.086873	0.66392	imputed	0.956	T	C	0.904499	-0.05227	0.087336	0.54951	genotyped	1	N/A	N/A	N/A	N/A	N/A	N/A	t	c	1.601	0.1093	++--	t
1	1HPG	rs1689879	8	16883965	MRPL49P2 / FGF20	T	C	0.19805	-0.16638	0.089663	0.063504	imputed	0.97	N/A	N/A	N/A	N/A	N/A	N/A	N/A	N/A	T	C	0.068334	-0.25408	0.09585	0.0080306	imputed	0.948	T	C	0.2723	-0.17782	0.056007	0.0014991	imputed	0.956	N/A	N/A	N/A	N/A	N/A	N/A	t	c	-4.484	7.31e-06	?---	t
1	1HPG	rs16915300	8	93957969	FLJ46284 / C8orf83	G	A	0.83699	0.42781	0.095031	6.74e-06	imputed	0.947	G	A	0.86051	-0.0020012	0.040822	0.9609	imputed	0.952	G	A	0.80339	-0.079136	0.062203	0.20329	imputed	0.982	N/A	N/A	N/A	N/A	N/A	N/A	N/A	N/A	N/A	N/A	N/A	N/A	N/A	N/A	a	g	-1.402	0.161	++-?	a
1	1HPG	rs16915336	8	93971646	FLJ46284 / LOC389676	T	C	0.84302	0.43105	0.095108	5.84e-06	imputed	0.995	T	C	0.934574	-0.003713	0.055426	0.94659	imputed	0.997	T	C	0.80542	-0.071716	0.06217	0.24869	imputed	0.997	N/A	N/A	N/A	N/A	N/A	N/A	N/A	N/A	N/A	N/A	N/A	N/A	N/A	N/A	t	c	1.484	0.1379	--+?	t
1	1HPG	rs7041546	9	7377603	JMJD2C / LOC158345	T	C	0.69758	0.072806	0.076736	0.34273	genotyped	1	T	C	0.948372	-0.027315	0.061179	0.65525	genotyped	1	T	C	0.68727	0.028422	0.051563	0.58149	genotyped	1	T	C	0.929966	-0.44702	0.098434	5.59e-06	genotyped	1	N/A	N/A	N/A	N/A	N/A	N/A	t	c	-1.847	0.0648	-++-	t
1	1HPG	rs10116105	9	80628359	PSAT1 / KRT18P24	T	C	0.20012	0.39573	0.088077	7.02e-06	genotyped	1	T	C	0.7009	0.038083	0.029586	0.19803	genotyped	1	T	C	0.24982	-0.097105	0.055566	0.080543	genotyped	1	T	C	0.41726	-0.019013	0.050442	0.70624	imputed	0.974	N/A	N/A	N/A	N/A	N/A	N/A	t	c	1.397	0.1623	+-+-	t
1	1HPG	rs12343368	9	93618316	ROR2	N/A	N/A	N/A	N/A	N/A	N/A	N/A	N/A	T	C	0.7185	0.079524	0.032413	0.01415	imputed	0.912	N/A	N/A	N/A	N/A	N/A	N/A	N/A	N/A	T	C	0.76457	0.26558	0.062076	1.88e-05	imputed	0.904	N/A	N/A	N/A	N/A	N/A	N/A	t	c	4.788	1.68e-06	+??+	N/A
1	1HPG	rs4746822	10	70652947	HKDC1	T	C	0.54307	0.239	0.071105	0.00077585	imputed	0.981	N/A	N/A	N/A	N/A	N/A	N/A	N/A	N/A	T	C	0.65099	0.064709	0.05062	0.20113	imputed	0.988	T	C	0.3508	0.17603	0.052801	0.00085671	imputed	0.955	C	T	0.3255	-0.1502	0.06423	0.01943	t	c	4.445	8.77e-06	?+++	t
1	1HPG	rs3847554	11	92308474	LOC100128354	T	C	0.34333	0.1453	0.070853	0.040299	genotyped	1	T	C	0.89535	-0.032778	0.04484	0.46478	genotyped	1	T	C	0.41671	0.19419	0.049371	8.38e-05	genotyped	0.999	T	C	0.5775	0.22149	0.052283	2.27e-05	genotyped	0.999	T	C	0.4393	0.1722	0.04136	3.25e-05	t	c	4.886	1.03e-06	-+++	t
1	1HPG	rs1387153	11	92313476	LOC100128354 / MTNR1B	T	C	0.24051	0.16552	0.079807	0.038074	genotyped	1	T	C	0.33907	0.018667	0.02939	0.52534	genotyped	1	T	C	0.30285	0.27191	0.051895	1.61e-07	genotyped	1	T	C	0.43591	0.2058	0.051135	5.7e-05	genotyped	1	T	C	0.3123	0.2565	0.04328	3.57e-09	t	c	6.185	6.22e-10	++++	t
1	1HPG	rs11523890	11	92319426	LOC100128354 / MTNR1B	T	C	0.27784	0.13305	0.076322	0.081293	imputed	0.987	T	C	0.36967	0.013234	0.029086	0.64911	imputed	0.961	T	C	0.33725	0.28545	0.052731	6.19e-08	imputed	0.902	T	C	0.43731	0.2057	0.05132	6.12e-05	imputed	0.992	N/A	N/A	N/A	N/A	N/A	N/A	t	c	6.042	1.52e-09	++++	t
1	1HPG	rs10830956	11	92320661	LOC100128354 / MTNR1B	T	C	0.24164	0.16741	0.079866	0.036066	imputed	0.997	T	C	0.34516	0.019109	0.029741	0.52053	imputed	0.957	T	C	0.31074	0.28177	0.052607	8.5e-08	imputed	0.964	T	C	0.43505	0.20737	0.051446	5.56e-05	imputed	0.986	N/A	N/A	N/A	N/A	N/A	N/A	t	c	6.266	3.71e-10	++++	t
1	1HPG	rs7933855	11	92323970	LOC100128354 / MTNR1B	G	A	0.66029	-0.14274	0.072117	0.047784	imputed	0.993	N/A	N/A	N/A	N/A	N/A	N/A	N/A	N/A	G	A	0.59592	-0.23983	0.049477	1.25e-06	imputed	0.982	G	A	0.54515	-0.18061	0.051686	0.00047516	imputed	0.981	N/A	N/A	N/A	N/A	N/A	N/A	a	g	6.135	8.51e-10	?+++	a
1	1HPG	rs7936247	11	92329680	LOC100128354 / MTNR1B	T	G	0.27791	0.13212	0.07611	0.082577	imputed	0.99	T	G	0.36983	0.013283	0.029124	0.64833	imputed	0.958	T	G	0.33756	0.28908	0.052652	4.01e-08	imputed	0.903	T	G	0.43635	0.20591	0.051408	6.19e-05	imputed	0.995	T	G	0.3605	0.2368	0.04197	1.88e-08	t	g	6.081	1.2e-09	++++	t
1	1HPG	rs11020124	11	92330309	LOC100128354 / MTNR1B	T	C	0.75655	-0.1701	0.081814	0.03761	imputed	0.945	N/A	N/A	N/A	N/A	N/A	N/A	N/A	N/A	N/A	N/A	N/A	N/A	N/A	N/A	N/A	N/A	T	C	0.56806	-0.21213	0.052663	5.62e-05	imputed	0.946	N/A	N/A	N/A	N/A	N/A	N/A	t	c	-4.426	9.61e-06	??--	N/A
1	1HPG	rs2166706	11	92331180	LOC100128354 / MTNR1B	T	C	0.67625	-0.088856	0.073036	0.22376	genotyped	1	T	C	0.34419	-0.010333	0.029835	0.72908	genotyped	1	T	C	0.60973	-0.25064	0.04905	3.22e-07	genotyped	1	T	C	0.55053	-0.17721	0.051265	0.00054657	genotyped	1	N/A	N/A	N/A	N/A	N/A	N/A	t	c	-5.31	1.1e-07	----	t
1	1HPG	rs10830963	11	92348358	MTNR1B	G	C	0.24038	0.20011	0.080903	0.013383	genotyped	0.999	N/A	N/A	N/A	N/A	N/A	N/A	genotyped	NA	N/A	N/A	N/A	N/A	N/A	N/A	N/A	N/A	G	C	0.42317	0.26668	0.052159	3.17e-07	genotyped	1	N/A	N/A	N/A	N/A	N/A	N/A	c	g	-5.512	3.56e-08	??--	N/A
1	1HPG	rs1562444	11	92355497	MTNR1B	G	A	0.25949	-0.043757	0.079806	0.58349	genotyped	1	G	A	0.43071	-0.022318	0.028016	0.42568	genotyped	1	G	A	0.49593	-0.26414	0.048258	4.41e-08	imputed	0.97	G	A	0.26422	-0.14715	0.057475	0.010458	imputed	0.974	N/A	N/A	N/A	N/A	N/A	N/A	a	g	4.985	6.21e-07	++++	a
1	1HPG	rs4753072	11	92357053	MTNR1B / SLC36A4	C	A	0.25848	-0.026568	0.079749	0.73902	imputed	0.996	C	A	0.42394	-0.025662	0.028133	0.36168	imputed	0.992	C	A	0.49495	-0.26238	0.048019	4.65e-08	imputed	0.978	C	A	0.26326	-0.14713	0.057466	0.010456	imputed	0.979	N/A	N/A	N/A	N/A	N/A	N/A	a	c	4.944	7.65e-07	++++	a
1	1HPG	rs4753073	11	92357123	MTNR1B / SLC36A4	G	A	0.26194	-0.0036338	0.079322	0.96346	genotyped	1	G	A	0.47358	-0.021844	0.027611	0.42887	genotyped	0.999	G	A	0.50949	-0.26554	0.049506	8.15e-08	imputed	0.924	G	A	0.27122	-0.14395	0.055957	0.010098	genotyped	1	N/A	N/A	N/A	N/A	N/A	N/A	a	g	4.712	2.46e-06	++++	a
1	1HPG	rs1447350	11	92357775	MTNR1B / SLC36A4	G	C	0.26052	-0.013038	0.079488	0.86971	imputed	0.996	G	C	0.46605	-0.017706	0.027606	0.52126	imputed	0.991	G	C	0.50362	-0.26339	0.048711	6.4e-08	imputed	0.953	G	C	0.26625	-0.149	0.057994	0.01019	imputed	0.948	N/A	N/A	N/A	N/A	N/A	N/A	c	g	4.711	2.46e-06	++++	c
1	1HPG	rs1447351	11	92357811	MTNR1B / SLC36A4	G	A	0.74174	0.031669	0.079543	0.69053	genotyped	1	G	A	0.57023	0.023853	0.027977	0.3939	genotyped	1	G	A	0.5048	0.262	0.04783	4.31e-08	imputed	0.987	G	A	0.73579	0.14805	0.058131	0.010869	imputed	0.951	N/A	N/A	N/A	N/A	N/A	N/A	a	g	-4.943	7.68e-07	----	a
1	1HPG	rs4611171	11	92358855	MTNR1B / SLC36A4	T	G	0.25845	-0.031633	0.079563	0.69094	imputed	0.999	T	G	0.42884	-0.023422	0.027993	0.40275	imputed	1	T	G	0.49263	-0.25947	0.047542	4.83e-08	imputed	1	T	G	0.26295	-0.14886	0.058412	0.010819	imputed	0.945	N/A	N/A	N/A	N/A	N/A	N/A	t	g	-4.925	8.44e-07	----	t
1	1HPG	rs1597023	11	92360967	MTNR1B / SLC36A4	G	A	0.25887	-0.040122	0.079548	0.61399	genotyped	1	G	A	0.42884	-0.023422	0.027993	0.40275	genotyped	1	G	A	0.49268	-0.25943	0.047534	4.82e-08	genotyped	1	G	A	0.26634	-0.1496	0.058683	0.010794	imputed	0.928	G	A	0.4699	-0.2068	0.03993	2.42e-07	a	g	4.971	6.65e-07	++++	a
1	1HPG	rs4406791	11	92361435	MTNR1B / SLC36A4	C	A	0.74156	0.031739	0.079566	0.68997	imputed	0.999	C	A	0.5711	0.023467	0.027996	0.40191	imputed	1	C	A	0.50735	0.25944	0.047537	4.82e-08	imputed	1	C	A	0.73692	0.14879	0.058435	0.010891	imputed	0.943	N/A	N/A	N/A	N/A	N/A	N/A	a	c	-4.925	8.44e-07	----	a
1	1HPG	rs1447352	11	92362409	MTNR1B / SLC36A4	G	A	0.25887	-0.040122	0.079548	0.61399	genotyped	1	G	A	0.4293	-0.024143	0.028012	0.38875	genotyped	1	G	A	0.49268	-0.25943	0.047534	4.82e-08	genotyped	1	G	A	0.26579	-0.14915	0.058678	0.011028	imputed	0.931	N/A	N/A	N/A	N/A	N/A	N/A	a	g	4.98	6.37e-07	++++	a
1	1HPG	rs6483213	11	92364969	MTNR1B / SLC36A4	G	A	0.73955	0.031821	0.079788	0.69003	imputed	0.989	G	A	0.56719	0.023998	0.028217	0.39507	imputed	0.983	G	A	0.50455	0.26174	0.04787	4.56e-08	imputed	0.987	G	A	0.73145	0.14995	0.058864	0.010855	imputed	0.918	N/A	N/A	N/A	N/A	N/A	N/A	a	g	-4.937	7.93e-07	----	a
1	1HPG	rs11177766	12	68329870	LRRC10 / BEST3	G	C	0.911114	0.2251	0.12496	0.071636	imputed	0.998	G	C	0.976227	0.17711	0.088284	0.044837	imputed	0.998	G	C	0.86568	0.27507	0.069539	7.63e-05	imputed	0.999	N/A	N/A	N/A	N/A	N/A	N/A	N/A	N/A	N/A	N/A	N/A	N/A	N/A	N/A	c	g	-4.616	3.91e-06	---?	c
1	1HPG	rs10906	12	68333765	BEST3	T	C	0.089351	-0.22158	0.12463	0.075426	genotyped	1	T	C	0.023721	-0.17672	0.088303	0.045363	genotyped	1	T	C	0.13424	-0.27497	0.069534	7.67e-05	genotyped	1	N/A	N/A	N/A	N/A	N/A	N/A	N/A	N/A	N/A	N/A	N/A	N/A	N/A	N/A	t	c	-4.601	4.21e-06	---?	t
1	1HPG	rs11177775	12	68336027	BEST3	T	C	0.088995	-0.2267	0.12501	0.069763	imputed	0.996	T	C	0.026296	-0.16362	0.085242	0.054917	imputed	0.965	T	C	0.13447	-0.27505	0.069544	7.65e-05	imputed	0.998	N/A	N/A	N/A	N/A	N/A	N/A	N/A	N/A	N/A	N/A	N/A	N/A	N/A	N/A	t	c	-4.572	4.83e-06	---?	t
1	1HPG	rs11177777	12	68336677	BEST3	T	A	0.089561	-0.22407	0.12504	0.073127	imputed	0.99	T	A	0.025763	-0.17718	0.08841	0.045058	imputed	0.926	T	A	0.1345	-0.27522	0.069547	7.58e-05	imputed	0.998	N/A	N/A	N/A	N/A	N/A	N/A	N/A	N/A	N/A	N/A	N/A	N/A	N/A	N/A	a	t	4.611	4e-06	+++?	a
1	1HPG	rs11177779	12	68336925	BEST3	G	A	0.910867	0.22491	0.12498	0.071934	imputed	0.995	G	A	0.974562	0.16516	0.086352	0.055795	imputed	0.968	G	A	0.86568	0.27486	0.06952	7.7e-05	imputed	0.999	N/A	N/A	N/A	N/A	N/A	N/A	N/A	N/A	N/A	N/A	N/A	N/A	N/A	N/A	a	g	-4.56	5.11e-06	---?	a
1	1HPG	rs11177780	12	68339035	BEST3	G	A	0.910731	0.22547	0.12497	0.071198	imputed	0.993	G	A	0.974908	0.16569	0.08813	0.060105	imputed	0.967	G	A	0.86543	0.27175	0.069497	9.22e-05	imputed	1	N/A	N/A	N/A	N/A	N/A	N/A	N/A	N/A	N/A	N/A	N/A	N/A	N/A	N/A	a	g	-4.516	6.32e-06	---?	a
1	1HPG	rs11177781	12	68341384	BEST3	G	C	0.088161	-0.23505	0.12525	0.060563	imputed	1	G	C	0.023722	-0.17674	0.088304	0.045337	imputed	1	G	C	0.13424	-0.27497	0.069534	7.67e-05	imputed	1	N/A	N/A	N/A	N/A	N/A	N/A	N/A	N/A	N/A	N/A	N/A	N/A	N/A	N/A	c	g	4.65	3.32e-06	+++?	c
1	1HPG	rs11177783	12	68342245	BEST3	T	C	0.911261	0.23175	0.12495	0.063627	genotyped	1	T	C	0.976279	0.17672	0.088303	0.045363	genotyped	1	T	C	0.86576	0.27497	0.069534	7.67e-05	genotyped	1	N/A	N/A	N/A	N/A	N/A	N/A	N/A	N/A	N/A	N/A	N/A	N/A	N/A	N/A	t	c	4.639	3.5e-06	+++?	t
1	1HPG	rs12367331	12	68344089	BEST3	T	A	0.088777	-0.23387	0.12498	0.061303	imputed	0.999	T	A	0.024666	-0.19558	0.086832	0.024297	imputed	0.999	T	A	0.13462	-0.27585	0.069494	7.21e-05	imputed	0.999	N/A	N/A	N/A	N/A	N/A	N/A	N/A	N/A	T	A	0.143	0.01196	0.05616	0.8314	a	t	4.801	1.58e-06	+++?	a
1	1HPG	rs17225496	12	68355738	BEST3	T	C	0.083995	-0.18991	0.12762	0.13672	imputed	0.998	T	C	0.024205	-0.20116	0.087528	0.021551	imputed	0.999	T	C	0.13023	-0.29497	0.07051	2.87e-05	imputed	1	N/A	N/A	N/A	N/A	N/A	N/A	N/A	N/A	N/A	N/A	N/A	N/A	N/A	N/A	t	c	-4.774	1.8e-06	---?	t
1	1HPG	rs11177789	12	68359485	BEST3	C	A	0.093218	-0.10061	0.12288	0.41293	imputed	0.996	C	A	0.028948	-0.21027	0.082284	0.010607	imputed	0.964	C	A	0.14157	-0.27096	0.068437	7.52e-05	imputed	0.988	N/A	N/A	N/A	N/A	N/A	N/A	genotyped	NA	N/A	N/A	N/A	N/A	N/A	N/A	a	c	4.442	8.92e-06	+++?	a
1	1HPG	rs11113250	12	106195996	CRY1 / BTBD11	G	A	0.69756	0.084249	0.075686	0.26565	imputed	1	G	A	0.71035	0.14247	0.031149	4.79e-06	imputed	0.995	G	A	0.57399	0.062227	0.047993	0.19477	imputed	0.998	G	A	0.79948	0.081247	0.062291	0.19213	imputed	0.989	N/A	N/A	N/A	N/A	N/A	N/A	a	g	-4.121	3.78e-05	----	a
1	1HPG	rs2193353	12	106197025	CRY1 / BTBD11	T	A	0.68573	0.083616	0.077013	0.27759	imputed	0.946	T	A	0.68986	0.15005	0.031221	1.54e-06	imputed	0.923	T	A	0.56668	0.062152	0.048576	0.20073	imputed	0.97	T	A	0.79328	0.076162	0.062518	0.22313	imputed	0.957	N/A	N/A	N/A	N/A	N/A	N/A	a	t	-4.169	3.05e-05	----	a
1	1HPG	rs2374688	12	106197332	CRY1 / BTBD11	T	G	0.30233	-0.084996	0.075637	0.26112	genotyped	1	T	G	0.2893	-0.14277	0.031092	4.39e-06	genotyped	1	T	G	0.42612	-0.060588	0.047923	0.20613	genotyped	1	T	G	0.20001	-0.08017	0.062022	0.19615	imputed	0.999	N/A	N/A	N/A	N/A	N/A	N/A	t	g	-4.11	3.95e-05	----	t
1	1HPG	rs2374689	12	106198500	CRY1 / BTBD11	G	A	0.64321	0.098468	0.072599	0.17499	genotyped	1	G	A	0.63116	0.1335	0.028408	2.61e-06	genotyped	1	G	A	0.45757	0.071617	0.049123	0.14486	genotyped	1	G	A	0.79414	0.10174	0.061197	0.096415	genotyped	1	N/A	N/A	N/A	N/A	N/A	N/A	a	g	-4.561	5.09e-06	----	a
1	1HPG	rs1861691	12	106201676	CRY1 / BTBD11	C	A	0.69214	0.08309	0.07527	0.26964	imputed	0.988	C	A	0.71279	0.14261	0.031463	5.83e-06	imputed	0.983	C	A	0.57792	0.060768	0.048934	0.21429	imputed	0.963	C	A	0.75806	0.07501	0.056678	0.18569	genotyped	1	N/A	N/A	N/A	N/A	N/A	N/A	a	c	-4.076	4.58e-05	----	a
1	1HPG	rs2342227	13	84925872	LOC387939 / SLITRK6	G	A	0.76622	0.071535	0.08403	0.3946	genotyped	1	G	A	0.7293	0.14926	0.030494	9.84e-07	genotyped	1	G	A	0.62363	-0.0038608	0.050487	0.93904	genotyped	1	N/A	N/A	N/A	N/A	N/A	N/A	N/A	N/A	N/A	N/A	N/A	N/A	N/A	N/A	a	g	-3.188	0.001433	-+-?	a
1	1HPG	rs1576669	13	84929049	LOC387939 / SLITRK6	T	C	0.21788	-0.06142	0.090084	0.49536	imputed	0.91	T	C	0.24932	-0.15809	0.032445	1.1e-06	imputed	0.929	N/A	N/A	N/A	N/A	N/A	N/A	N/A	N/A	N/A	N/A	N/A	N/A	N/A	N/A	N/A	N/A	N/A	N/A	N/A	N/A	N/A	N/A	t	c	-4.121	3.78e-05	-?-?	N/A
1	1HPG	rs1412031	13	84933860	LOC387939 / SLITRK6	C	A	0.74762	0.030746	0.081685	0.70662	imputed	0.987	C	A	0.73089	0.14169	0.0313	5.99e-06	imputed	0.949	C	A	0.59214	-0.0099639	0.050928	0.84489	imputed	0.972	C	A	0.984295	0.064203	0.1998	0.74795	genotyped	1	N/A	N/A	N/A	N/A	N/A	N/A	a	c	-2.447	0.01442	-+--	a
1	1HPG	rs1412032	13	84933915	LOC387939 / SLITRK6	T	C	0.74849	0.032427	0.081484	0.69066	imputed	0.992	T	C	0.7356	0.13951	0.031086	7.19e-06	imputed	0.972	T	C	0.59052	-0.011207	0.050954	0.82591	imputed	0.973	T	C	0.983817	0.11322	0.19744	0.56633	imputed	0.996	N/A	N/A	N/A	N/A	N/A	N/A	t	c	2.553	0.01067	+-++	t
1	1HPG	rs7999714	13	89926244	KRT18P27 / LOC144776	C	A	0.36653	0.25383	0.072259	0.0004434	imputed	0.983	C	A	0.65157	0.0091551	0.029642	0.75743	imputed	0.962	C	A	0.55308	-0.094504	0.050492	0.061252	imputed	0.945	C	A	0.39855	-0.24725	0.054242	5.16e-06	imputed	0.924	N/A	N/A	N/A	N/A	N/A	N/A	a	c	1.728	0.08396	-+-+	a
1	1HPG	rs2150218	13	89926431	KRT18P27 / LOC144776	C	A	0.73333	-0.19879	0.078791	0.011638	imputed	0.978	N/A	N/A	N/A	N/A	N/A	N/A	N/A	N/A	C	A	0.60331	0.0965	0.051541	0.061163	imputed	0.938	C	A	0.66927	0.27665	0.056188	8.5e-07	imputed	0.928	N/A	N/A	N/A	N/A	N/A	N/A	a	c	-2.865	0.004175	?-+-	a
1	1HPG	rs9556022	13	89929964	KRT18P27 / LOC144776	T	G	0.36841	0.26312	0.071888	0.000252	imputed	0.992	T	G	0.67182	-0.0042026	0.030605	0.89078	imputed	0.909	T	G	0.56322	-0.094399	0.049619	0.05711	imputed	0.998	T	G	0.41007	-0.24001	0.052436	4.71e-06	imputed	0.987	N/A	N/A	N/A	N/A	N/A	N/A	t	g	-1.911	0.05596	--+-	t
1	1HPG	rs9560635	13	89936221	KRT18P27 / LOC144776	T	C	0.3672	0.25936	0.071804	0.00030387	genotyped	1	T	C	0.68419	-0.0011556	0.029531	0.96879	genotyped	1	T	C	0.56291	-0.092998	0.049561	0.060597	genotyped	1	T	C	0.40832	-0.23608	0.052103	5.87e-06	genotyped	1	N/A	N/A	N/A	N/A	N/A	N/A	t	c	-1.846	0.06496	--+-	t
1	1HPG	rs9301679	13	89938730	KRT18P27 / LOC144776	G	A	0.75153	-0.22458	0.07977	0.0048719	genotyped	1	G	A	0.84	0.051061	0.037736	0.17601	genotyped	1	G	A	0.594	0.098598	0.050398	0.05042	genotyped	1	G	A	0.65956	0.2643	0.054003	9.87e-07	imputed	1	N/A	N/A	N/A	N/A	N/A	N/A	a	g	-3.066	0.002172	--+-	a
1	1HPG	rs1929029	13	89939001	KRT18P27 / LOC144776	G	C	0.60917	-0.27395	0.074293	0.00022649	imputed	0.903	G	C	0.30662	0.00042413	0.030283	0.98883	imputed	0.96	G	C	0.42789	0.096807	0.050676	0.056094	imputed	0.961	G	C	0.57919	0.24244	0.053175	5.13e-06	imputed	0.948	N/A	N/A	N/A	N/A	N/A	N/A	c	g	-1.834	0.06663	--+-	c
1	1HPG	rs17634218	13	89939352	KRT18P27 / LOC144776	G	A	0.24365	0.2256	0.081403	0.0055811	imputed	0.977	G	A	0.15818	-0.050512	0.038224	0.18634	imputed	0.986	G	A	0.39817	-0.10082	0.0514	0.049828	imputed	0.966	G	A	0.3382	-0.2663	0.054398	9.8e-07	imputed	0.989	N/A	N/A	N/A	N/A	N/A	N/A	a	g	3.072	0.002123	++-+	a
1	1HPG	rs7995366	13	89943135	KRT18P27 / LOC144776	T	C	0.24682	0.22624	0.080167	0.0047706	imputed	0.991	T	C	0.15997	-0.051132	0.037743	0.1755	imputed	1	T	C	0.40551	-0.10048	0.050508	0.046665	imputed	0.996	T	C	0.34017	-0.2642	0.054095	1.04e-06	imputed	0.999	N/A	N/A	N/A	N/A	N/A	N/A	t	c	-3.077	0.002094	--+-	t
1	1HPG	rs914025	13	89944733	KRT18P27 / LOC144776	G	A	0.74386	-0.2189	0.079513	0.0059052	imputed	0.975	G	A	0.72399	0.0060932	0.031117	0.84476	imputed	0.978	G	A	0.59306	0.098039	0.05048	0.05212	imputed	0.992	G	A	0.65735	0.26611	0.05404	8.46e-07	imputed	0.997	N/A	N/A	N/A	N/A	N/A	N/A	a	g	-2.53	0.01139	--+-	a
1	1HPG	rs9522994	13	89949255	KRT18P27 / LOC144776	C	A	0.75887	-0.24721	0.080581	0.002156	genotyped	1	C	A	0.83535	0.049826	0.03738	0.18254	genotyped	1	C	A	0.6111	0.10465	0.051821	0.043439	imputed	0.954	C	A	0.6587	0.25532	0.054058	2.32e-06	imputed	0.992	N/A	N/A	N/A	N/A	N/A	N/A	a	c	-2.894	0.003801	--+-	a
1	1HPG	rs990102	13	89968202	KRT18P27 / LOC144776	T	C	0.75871	-0.24707	0.080604	0.002175	imputed	0.999	T	C	0.83352	0.053228	0.037349	0.15411	imputed	0.984	T	C	0.60152	0.10323	0.050466	0.040806	imputed	0.994	T	C	0.65433	0.25808	0.053757	1.58e-06	imputed	0.993	N/A	N/A	N/A	N/A	N/A	N/A	t	c	2.995	0.002742	++-+	t
1	1HPG	rs9523002	13	89970543	KRT18P27 / LOC144776	T	C	0.24774	0.2327	0.081631	0.0043627	imputed	0.971	T	C	0.16594	-0.057333	0.038222	0.13362	imputed	0.951	T	C	0.39077	-0.099331	0.052727	0.059584	imputed	0.915	T	C	0.26401	-0.25916	0.057963	7.78e-06	genotyped	1	N/A	N/A	N/A	N/A	N/A	N/A	t	c	-2.864	0.004177	--+-	t
1	1HPG	rs9515767	13	89974249	KRT18P27 / LOC144776	G	A	0.75183	-0.23368	0.080761	0.0038108	imputed	0.995	G	A	0.83162	0.055954	0.037202	0.13256	imputed	0.991	G	A	0.59966	0.094631	0.05059	0.061408	imputed	0.992	G	A	0.73566	0.25745	0.058021	9.12e-06	imputed	0.998	N/A	N/A	N/A	N/A	N/A	N/A	a	g	-2.823	0.004753	--+-	a
1	1HPG	rs1929044	13	89986651	KRT18P27 / LOC144776	T	C	0.7514	-0.23325	0.080385	0.0037118	imputed	0.989	T	C	0.82509	0.046794	0.036791	0.20341	imputed	0.987	T	C	0.59411	0.09216	0.051007	0.070791	imputed	0.974	T	C	0.73371	0.25897	0.058296	8.9e-06	imputed	0.98	N/A	N/A	N/A	N/A	N/A	N/A	t	c	2.673	0.007523	++-+	t
1	1HPG	rs9523011	13	89988895	KRT18P27 / LOC144776	G	C	0.24871	0.23301	0.080378	0.0037444	imputed	0.988	G	C	0.17484	-0.047394	0.036721	0.19682	imputed	0.989	G	C	0.40274	-0.091423	0.050675	0.071217	imputed	0.987	G	C	0.26413	-0.26204	0.058284	6.93e-06	imputed	0.99	N/A	N/A	N/A	N/A	N/A	N/A	c	g	2.709	0.006743	++-+	c
1	1HPG	rs9523013	13	89990487	KRT18P27 / LOC144776	G	C	0.74478	-0.23538	0.081011	0.0036659	imputed	0.955	G	C	0.81821	0.04157	0.036777	0.25835	imputed	0.945	G	C	0.59145	0.09264	0.051166	0.070206	imputed	0.963	G	C	0.72766	0.26272	0.058939	8.29e-06	imputed	0.949	N/A	N/A	N/A	N/A	N/A	N/A	c	g	-2.611	0.00902	--+-	c
1	1HPG	rs9523014	13	89990602	KRT18P27 / LOC144776	G	A	0.24571	0.23602	0.08055	0.0033889	imputed	0.989	G	A	0.17473	-0.047691	0.036745	0.19433	imputed	0.989	G	A	0.40296	-0.091362	0.050652	0.071278	imputed	0.987	G	A	0.26401	-0.26224	0.05828	6.81e-06	imputed	0.99	N/A	N/A	N/A	N/A	N/A	N/A	a	g	2.701	0.006909	++-+	a
1	1HPG	rs9523019	13	89997356	KRT18P27 / LOC144776	T	C	0.24349	0.24649	0.081351	0.0024462	imputed	0.973	T	C	0.17493	-0.048043	0.036875	0.19262	imputed	0.978	T	C	0.39812	-0.091285	0.051743	0.077699	imputed	0.954	T	C	0.26232	-0.26645	0.0593	7.01e-06	imputed	0.966	N/A	N/A	N/A	N/A	N/A	N/A	t	c	-2.636	0.0084	--+-	t
1	1HPG	rs9523021	13	90001555	KRT18P27 / LOC144776	G	C	0.75255	-0.25893	0.08014	0.0012335	imputed	0.994	G	C	0.7449	0.049207	0.032084	0.12511	imputed	0.969	G	C	0.58758	0.086898	0.050446	0.08496	imputed	0.988	G	C	0.73659	0.27412	0.058736	3.06e-06	imputed	0.981	N/A	N/A	N/A	N/A	N/A	N/A	c	g	-2.729	0.006347	--+-	c
1	1HPG	rs9588939	13	90006163	KRT18P27 / LOC144776	T	A	0.24537	0.24573	0.080055	0.0021435	imputed	1	T	A	0.17788	-0.044627	0.036637	0.2232	imputed	0.998	T	A	0.40873	-0.080989	0.05049	0.1087	imputed	0.998	T	A	0.26035	-0.27237	0.058648	3.42e-06	imputed	0.995	N/A	N/A	N/A	N/A	N/A	N/A	a	t	2.566	0.0103	++-+	a
1	1HPG	rs7318021	13	90008117	KRT18P27 / LOC144776	T	C	0.24541	0.24591	0.080035	0.0021226	genotyped	1	T	C	0.17814	-0.044531	0.036571	0.22336	genotyped	1	T	C	0.40892	-0.080637	0.050439	0.10989	genotyped	1	T	C	0.26061	-0.26743	0.05846	4.77e-06	genotyped	1	N/A	N/A	N/A	N/A	N/A	N/A	t	c	-2.525	0.01156	--+-	t
1	1HPG	rs12435258	14	85825790	LOC283584 / LOC283585	T	G	0.58629	0.0037632	0.070953	0.9577	genotyped	1	T	G	0.913023	-0.082459	0.047929	0.085354	genotyped	1	T	G	0.54938	-0.020479	0.048995	0.67596	genotyped	1	T	G	0.70331	0.25138	0.05495	4.77e-06	genotyped	1	N/A	N/A	N/A	N/A	N/A	N/A	t	g	1.301	0.1932	--++	t
1	1HPG	rs958991	15	90913804	C15orf32 / FAM174B	G	A	0.52204	0.31247	0.069907	7.83e-06	imputed	0.998	G	A	0.62237	-0.048261	0.028793	0.093718	imputed	1	G	A	0.37803	0.067492	0.050552	0.18184	imputed	0.998	G	A	0.82895	0.051541	0.067539	0.44538	genotyped	1	N/A	N/A	N/A	N/A	N/A	N/A	a	g	-2.227	0.02593	+---	a
1	1HPG	rs1563368	15	90915248	C15orf32 / FAM174B	T	C	0.47858	-0.31178	0.069827	8.01e-06	genotyped	1	T	C	0.37767	0.048285	0.02879	0.093509	genotyped	1	T	C	0.6218	-0.067404	0.050509	0.18204	genotyped	1	T	C	0.17064	-0.047247	0.06759	0.48454	imputed	0.999	N/A	N/A	N/A	N/A	N/A	N/A	t	c	-2.191	0.02843	+---	t
1	1HPG	rs4795997	17	30090161	TMEM132E / CCT6B	T	G	0.31381	-0.086772	0.075719	0.25181	imputed	0.999	T	G	0.40178	-0.010249	0.028405	0.71824	imputed	0.997	T	G	0.23963	-0.0044364	0.056886	0.93784	imputed	0.994	T	G	0.21815	-0.27419	0.061155	7.34e-06	imputed	0.965	N/A	N/A	N/A	N/A	N/A	N/A	t	g	-3.023	0.002504	----	t
1	1HPG	rs16970316	17	30091348	TMEM132E / CCT6B	G	A	0.68605	0.086697	0.075682	0.25199	genotyped	1	G	A	0.59814	0.010148	0.028365	0.72051	genotyped	1	G	A	0.76011	0.0045943	0.05687	0.93561	imputed	0.994	G	A	0.78178	0.274	0.061136	7.4e-06	imputed	0.966	N/A	N/A	N/A	N/A	N/A	N/A	a	g	-3.022	0.002513	----	a
1	1HPG	rs6506441	18	6787686	LOC100130480 / ARHGAP28	G	A	0.71481	-0.017215	0.076422	0.82178	genotyped	1	G	A	0.42419	0.0011875	0.028235	0.96645	genotyped	1	G	A	0.76957	0.27089	0.057236	2.21e-06	genotyped	1	G	A	0.6027	0.055956	0.052295	0.28461	genotyped	1	N/A	N/A	N/A	N/A	N/A	N/A	a	g	-3.102	0.001919	--+-	a
1	1HPG	rs2096994	18	48601487	DCC	C	A	0.76982	0.37254	0.083764	8.69e-06	genotyped	0.998	C	A	0.45581	0.0081156	0.027903	0.77116	genotyped	1	C	A	0.74984	0.01989	0.055673	0.72089	genotyped	1	C	A	0.51914	-0.007752	0.050625	0.8783	genotyped	1	N/A	N/A	N/A	N/A	N/A	N/A	a	c	-2.171	0.02993	---+	a
1	1HPG	rs1457486	18	56116173	LOC342784 / MC4R	T	C	0.697	-0.048784	0.076652	0.52449	imputed	0.993	T	C	0.62035	-0.0068002	0.028773	0.81317	imputed	0.959	T	C	0.69443	-0.23195	0.051124	5.71e-06	imputed	0.99	T	C	0.8487	0.02811	0.072836	0.69955	imputed	0.993	N/A	N/A	N/A	N/A	N/A	N/A	t	c	-2.709	0.006751	---+	t
1	1HPG	rs930885	18	56138663	LOC342784 / MC4R	T	A	0.30108	0.039075	0.077069	0.61215	imputed	0.971	N/A	N/A	N/A	N/A	N/A	N/A	N/A	N/A	T	A	0.30775	0.24042	0.052236	4.17e-06	imputed	0.952	T	A	0.15167	-0.027598	0.074207	0.70996	imputed	0.963	N/A	N/A	N/A	N/A	N/A	N/A	a	t	-2.965	0.00303	?--+	a
1	1HPG	rs9962708	18	56155797	LOC342784 / MC4R	G	C	0.6986	-0.03843	0.076535	0.61558	imputed	0.984	G	C	0.52793	-0.011512	0.027502	0.67551	imputed	0.98	G	C	0.6983	-0.23768	0.052122	5.11e-06	imputed	0.964	G	C	0.84975	0.021786	0.073912	0.76818	imputed	0.972	N/A	N/A	N/A	N/A	N/A	N/A	c	g	2.801	0.005099	+++-	c
1	1HPG	rs12457423	18	56157648	LOC342784 / MC4R	T	C	0.29927	0.038334	0.076185	0.61484	genotyped	1	T	C	0.47535	0.0042737	0.027244	0.87535	genotyped	1	T	C	0.30065	0.23439	0.051895	6.28e-06	imputed	0.973	T	C	0.14686	-0.021837	0.073661	0.76689	genotyped	1	N/A	N/A	N/A	N/A	N/A	N/A	t	c	2.647	0.008112	+++-	t
1	1HPG	rs4814501	20	16396205	KIF16B	G	A	0.46695	-0.024578	0.070265	0.7265	genotyped	1	G	A	0.69582	0.036093	0.029594	0.22262	genotyped	1	G	A	0.44367	-0.10492	0.04825	0.029665	genotyped	1	G	A	0.31772	-0.24914	0.055183	6.34e-06	imputed	0.954	N/A	N/A	N/A	N/A	N/A	N/A	a	g	3.083	0.002049	-+++	a
1	1HPG	rs4814503	20	16396454	KIF16B	T	A	0.54185	0.024439	0.070448	0.72866	imputed	0.993	T	A	0.52751	-0.048628	0.028932	0.092806	imputed	0.91	T	A	0.5609	0.10699	0.048802	0.028355	imputed	0.976	T	A	0.69826	0.25118	0.05609	7.53e-06	imputed	0.943	N/A	N/A	N/A	N/A	N/A	N/A	a	t	-2.846	0.004429	+---	a
1	1HPG	rs2876429	20	16403401	KIF16B	T	C	0.5263	0.0097007	0.070774	0.89098	imputed	0.995	T	C	0.25321	-0.024479	0.031289	0.43401	imputed	0.993	T	C	0.54198	0.10968	0.04892	0.024963	imputed	0.974	T	C	0.68843	0.24907	0.05505	6.05e-06	imputed	0.965	N/A	N/A	N/A	N/A	N/A	N/A	t	c	3.249	0.001156	-+++	t
1	1HPG	rs6096631	20	49921721	SALL4 / ZFP64	G	C	0.62188	0.32787	0.073407	7.95e-06	imputed	0.903	N/A	N/A	N/A	N/A	N/A	N/A	N/A	N/A	N/A	N/A	N/A	N/A	N/A	N/A	N/A	N/A	N/A	N/A	N/A	N/A	N/A	N/A	N/A	N/A	N/A	N/A	N/A	N/A	N/A	N/A	c	g	-4.466	7.95e-06	??-?	N/A
1	1HPG	rs1573755	22	24600464	MYO18B	C	A	0.970624	0.23633	0.20971	0.25976	genotyped	1	C	A	0.975814	0.45328	0.091023	6.36e-07	genotyped	1	C	A	0.975974	0.09032	0.16482	0.58369	imputed	0.938	C	A	0.927225	-0.045906	0.10082	0.64888	imputed	0.911	N/A	N/A	N/A	N/A	N/A	N/A	a	c	-3.004	0.002662	---+	a
1	1HPG	rs5769452	22	47981818	LOC100128946 / LOC643653	C	A	0.41684	-0.12653	0.069894	0.070237	imputed	0.985	N/A	N/A	N/A	N/A	N/A	N/A	N/A	N/A	C	A	0.67252	-0.11151	0.052926	0.035127	imputed	0.97	C	A	0.33531	-0.20747	0.053355	0.00010089	imputed	0.992	N/A	N/A	N/A	N/A	N/A	N/A	a	c	4.538	5.69e-06	?+++	a
1	2HPG	rs7547211	1	117753152	MAN1A2	T	G	0.93507	-0.51991	0.11332	4.48e-06	imputed	0.972	N/A	N/A	N/A	N/A	N/A	N/A	N/A	N/A	T	G	0.86621	0.016116	0.05831	0.78226	imputed	0.989	N/A	N/A	N/A	N/A	N/A	N/A	N/A	N/A	N/A	N/A	N/A	N/A	N/A	N/A	t	g	-2.587	0.009671	?+-?	t
1	2HPG	rs10923289	1	117762733	MAN1A2	T	C	0.934237	-0.51341	0.11195	4.51e-06	imputed	0.985	N/A	N/A	N/A	N/A	N/A	N/A	N/A	N/A	T	C	0.86498	0.015531	0.058272	0.78983	imputed	0.982	T	C	0.985689	0.18386	0.19147	0.33693	imputed	0.958	N/A	N/A	N/A	N/A	N/A	N/A	t	c	-1.522	0.1279	?+-+	t
1	2HPG	rs984402	1	239182306	RGS7	T	C	0.59058	-0.024337	0.054963	0.65792	genotyped	1	T	C	0.77255	-0.011989	0.029183	0.6812	genotyped	1	T	C	0.61558	0.19009	0.040508	2.7e-06	genotyped	1	N/A	N/A	N/A	N/A	N/A	N/A	N/A	N/A	N/A	N/A	N/A	N/A	N/A	N/A	t	c	2.582	0.009835	-+-?	t
1	2HPG	rs12143076	1	239192232	RGS7	G	C	0.41386	0.051234	0.055504	0.35597	imputed	0.97	N/A	N/A	N/A	N/A	N/A	N/A	N/A	N/A	G	C	0.3958	-0.18048	0.040713	9.29e-06	imputed	0.976	G	C	0.25084	0.01364	0.053072	0.79717	imputed	0.953	N/A	N/A	N/A	N/A	N/A	N/A	c	g	2.22	0.02645	?+--	c
1	2HPG	rs12132113	1	239192370	RGS7	T	A	0.39597	0.048012	0.055446	0.38653	imputed	0.993	T	A	0.18225	0.018644	0.032033	0.56054	imputed	0.938	T	A	0.39043	-0.18126	0.040457	7.45e-06	imputed	0.997	T	A	0.23968	0.0017076	0.053198	0.97439	imputed	0.986	N/A	N/A	N/A	N/A	N/A	N/A	a	t	1.812	0.06995	-+--	a
1	2HPG	rs892605	3	10682861	ATP2B2 / SLC6A11	G	A	0.2246	-0.065891	0.065824	0.31682	genotyped	1	G	A	0.098605	-0.0051793	0.041395	0.90043	genotyped	1	G	A	0.28347	0.014688	0.043629	0.73638	genotyped	1	G	A	0.23829	-0.2385	0.052821	6.32e-06	genotyped	0.999	N/A	N/A	N/A	N/A	N/A	N/A	a	g	2.631	0.008518	+-++	a
1	2HPG	rs12695959	3	151850171	SELT / C3orf44	C	A	0.59125	-0.031851	0.058412	0.58556	imputed	0.939	C	A	0.30658	0.11729	0.02651	9.68e-06	genotyped	0.996	N/A	N/A	N/A	N/A	N/A	N/A	N/A	N/A	C	A	0.368	0.0076187	0.046224	0.86909	genotyped	1	N/A	N/A	N/A	N/A	N/A	N/A	a	c	-2.439	0.01473	-?+-	N/A
1	2HPG	rs1879807	3	151850513	SELT / C3orf44	C	A	0.42767	0.031256	0.058114	0.59069	imputed	0.93	C	A	0.70469	-0.125	0.027385	5e-06	imputed	0.94	N/A	N/A	N/A	N/A	N/A	N/A	N/A	N/A	C	A	0.63882	-0.0017555	0.04694	0.97017	imputed	0.968	N/A	N/A	N/A	N/A	N/A	N/A	a	c	2.447	0.01441	+?-+	N/A
1	2HPG	rs4399946	4	90414020	GPRIN3	C	T	0.9541	-0.059825	0.12492	0.63201	genotyped	1	C	T	0.78372	0.031558	0.029454	0.28397	genotyped	1	C	T	0.911851	0.090953	0.067124	0.17542	genotyped	1	C	T	0.988574	-0.96506	0.20944	4.07e-06	genotyped	0.997	N/A	N/A	N/A	N/A	N/A	N/A	t	c	1.3	0.1935	--++	t
1	2HPG	rs4692973	4	93669372	GRID2	T	C	0.83966	0.11985	0.071556	0.093964	genotyped	1	T	C	0.73209	-0.0050859	0.027284	0.85213	genotyped	1	T	C	0.74169	-0.19966	0.044315	6.62e-06	genotyped	1	T	C	0.78395	-0.044887	0.052419	0.39183	genotyped	1	N/A	N/A	N/A	N/A	N/A	N/A	t	c	-2.315	0.02061	--+-	t
1	2HPG	rs10025074	4	95693585	PDLIM5	G	A	0.13038	-0.067228	0.081685	0.4105	imputed	0.953	G	A	0.30393	-0.0084717	0.027161	0.75511	imputed	0.97	G	A	0.18857	0.23105	0.051828	8.27e-06	imputed	0.948	G	A	0.068431	-0.077356	0.089373	0.38675	imputed	0.977	N/A	N/A	N/A	N/A	N/A	N/A	a	g	-1.522	0.128	+-++	a
1	2HPG	rs6830074	4	95701234	PDLIM5	T	G	0.15678	-0.079643	0.075548	0.29179	imputed	0.966	T	G	0.62445	-0.018476	0.0255	0.46872	imputed	0.986	T	G	0.20035	0.2541	0.05068	5.33e-07	imputed	0.944	T	G	0.069535	-0.072444	0.088926	0.41527	imputed	0.975	N/A	N/A	N/A	N/A	N/A	N/A	t	g	1.554	0.1201	-+--	t
1	2HPG	rs3805274	4	95701843	PDLIM5	T	C	0.1515	-0.074587	0.077632	0.33666	imputed	0.924	T	C	0.60158	-0.015955	0.025886	0.53766	imputed	0.908	T	C	0.19752	0.25269	0.051208	8.04e-07	imputed	0.93	T	C	0.066953	-0.076515	0.091686	0.40398	imputed	0.952	N/A	N/A	N/A	N/A	N/A	N/A	t	c	1.593	0.1111	-+--	t
1	2HPG	rs2452593	4	95706737	PDLIM5	G	A	0.20685	-0.07738	0.066553	0.24496	genotyped	1	G	A	0.62	-0.0023646	0.025188	0.9252	genotyped	1	G	A	0.22421	0.23872	0.047408	4.77e-07	genotyped	1	G	A	0.071736	-0.043008	0.087395	0.62264	genotyped	1	G	A	0.2329	-0.04079	0.04023	0.3108	a	g	-1.996	0.04591	+-++	a
1	2HPG	rs2452594	4	95708105	PDLIM5	G	A	0.79137	0.082368	0.067023	0.21909	imputed	0.979	G	A	0.35782	-0.0078247	0.025986	0.76332	imputed	0.974	G	A	0.77253	-0.23355	0.048045	1.17e-06	imputed	0.958	N/A	N/A	N/A	N/A	N/A	N/A	N/A	N/A	N/A	N/A	N/A	N/A	N/A	N/A	a	g	2.706	0.00681	++-?	a
1	2HPG	rs3828518	4	95719651	PDLIM5	G	A	0.1787	-0.071507	0.071302	0.31592	genotyped	1	G	A	0.31953	0.01217	0.026399	0.64478	genotyped	1	G	A	0.21529	0.21866	0.048899	7.76e-06	imputed	0.973	G	A	0.12903	-0.015217	0.06739	0.82135	genotyped	1	N/A	N/A	N/A	N/A	N/A	N/A	a	g	-2.162	0.0306	--++	a
1	2HPG	rs11097431	4	95725865	PDLIM5	G	A	0.82374	0.082798	0.07179	0.24877	genotyped	1	G	A	0.70419	-0.005633	0.027143	0.8356	genotyped	1	G	A	0.788	-0.21673	0.048687	8.53e-06	imputed	0.993	G	A	0.87114	0.0054804	0.068369	0.93611	imputed	0.965	N/A	N/A	N/A	N/A	N/A	N/A	a	g	2.037	0.04167	++--	a
1	2HPG	rs17336353	4	95735539	PDLIM5	G	A	0.16952	-0.081221	0.072644	0.26353	genotyped	1	G	A	0.25256	0.024829	0.028412	0.38218	genotyped	1	G	A	0.20922	0.22116	0.048659	5.49e-06	genotyped	1	G	A	0.12401	0.0048428	0.069611	0.94454	imputed	0.958	N/A	N/A	N/A	N/A	N/A	N/A	a	g	-2.509	0.01211	--+-	a
1	2HPG	rs7655928	4	95787979	PDLIM5	C	A	0.1667	-0.11588	0.07368	0.11577	imputed	0.993	C	A	0.35121	0.036767	0.025468	0.14884	imputed	0.993	C	A	0.21136	0.22764	0.048756	3.03e-06	imputed	0.98	C	A	0.12677	0.0020848	0.068621	0.97576	imputed	0.986	N/A	N/A	N/A	N/A	N/A	N/A	a	c	-2.643	0.008221	--+-	a
1	2HPG	rs7656545	4	95788239	PDLIM5	T	A	0.15514	-0.11224	0.077475	0.1474	imputed	0.941	N/A	N/A	N/A	N/A	N/A	N/A	N/A	N/A	T	A	0.20692	0.22969	0.049535	3.54e-06	imputed	0.959	N/A	N/A	N/A	N/A	N/A	N/A	N/A	N/A	N/A	N/A	N/A	N/A	N/A	N/A	a	t	-2.782	0.005396	?-+?	a
1	2HPG	rs11731136	4	176098257	ADAM29	C	A	0.70685	-0.015128	0.060347	0.80206	genotyped	1	C	A	0.48465	-0.1055	0.023868	9.86e-06	genotyped	1	C	A	0.81748	0.012729	0.049915	0.79871	genotyped	1	C	A	0.70334	-0.029668	0.047553	0.5327	imputed	0.997	N/A	N/A	N/A	N/A	N/A	N/A	a	c	2.463	0.01377	+-++	a
1	2HPG	rs13136874	4	176098624	ADAM29	T	C	0.70635	-0.014977	0.06038	0.8041	imputed	0.997	T	C	0.48468	-0.10547	0.023872	9.96e-06	imputed	0.999	T	C	0.81724	0.013756	0.049942	0.78298	imputed	0.995	T	C	0.70331	-0.028661	0.047412	0.54551	genotyped	1	N/A	N/A	N/A	N/A	N/A	N/A	t	c	-2.44	0.0147	-+--	t
1	2HPG	rs1904344	4	176199568	LOC100131553 / LOC100129957	G	C	0.21196	0.14077	0.067022	0.035691	imputed	0.951	G	C	0.21652	0.092652	0.029698	0.0018099	imputed	0.953	N/A	N/A	N/A	N/A	N/A	N/A	N/A	N/A	G	C	0.55769	0.12039	0.045633	0.0083319	imputed	0.979	N/A	N/A	N/A	N/A	N/A	N/A	c	g	-4.564	5.02e-06	-?--	N/A
1	2HPG	rs4337871	5	36441060	RANBP3L / SLC1A3	N/A	N/A	N/A	N/A	N/A	N/A	N/A	N/A	A	T	0.88212	0.17469	0.038921	7.18e-06	imputed	0.918	N/A	N/A	N/A	N/A	N/A	N/A	N/A	N/A	N/A	N/A	N/A	N/A	N/A	N/A	N/A	N/A	N/A	N/A	N/A	N/A	N/A	N/A	a	t	4.488	7.18e-06	+???	N/A
1	2HPG	rs4626470	6	9047385	LOC389365 / OFCC1	G	A	0.33476	0.2097	0.055852	0.00017363	genotyped	1	G	A	0.12465	0.068545	0.0374	0.066841	genotyped	1	N/A	N/A	N/A	N/A	N/A	N/A	N/A	N/A	G	A	0.10611	0.17325	0.070918	0.014571	genotyped	1	N/A	N/A	N/A	N/A	N/A	N/A	a	g	-4.535	5.77e-06	-?--	N/A
1	2HPG	rs6922215	6	111447220	BXDC1	T	C	0.095984	0.41118	0.090047	4.96e-06	imputed	0.982	N/A	N/A	N/A	N/A	N/A	N/A	N/A	N/A	N/A	N/A	N/A	N/A	N/A	N/A	N/A	N/A	T	C	0.36432	-0.072545	0.047411	0.12599	imputed	0.922	N/A	N/A	N/A	N/A	N/A	N/A	t	c	1.746	0.08074	??+-	N/A
1	2HPG	rs7756134	6	162658794	PARK2	T	C	0.033048	-0.1633	0.14772	0.26897	genotyped	1	T	C	0.15763	-0.042583	0.033753	0.20709	genotyped	1	T	C	0.039503	0.48099	0.097405	7.89e-07	genotyped	1	T	C	0.059847	-0.12071	0.091972	0.18938	genotyped	1	T	C	0.04055	0.03409	0.08702	0.6953	t	c	0.969	0.3324	-+--	t
1	2HPG	rs7742255	6	162659172	PARK2	N/A	N/A	N/A	N/A	N/A	N/A	N/A	N/A	T	A	0.84267	0.041846	0.033781	0.21544	imputed	0.999	T	A	0.960302	-0.48132	0.097362	7.67e-07	imputed	0.994	T	A	0.940142	0.12073	0.092135	0.19007	imputed	0.998	N/A	N/A	N/A	N/A	N/A	N/A	a	t	1.615	0.1062	-+?-	a
1	2HPG	rs2057917	7	67867804	STAG3L4 / AUTS2	G	A	0.35435	0.25467	0.056916	7.66e-06	genotyped	1	G	A	0.17953	0.011736	0.031264	0.70738	genotyped	1	G	A	0.44696	0.038343	0.038921	0.32455	genotyped	1	G	A	0.51545	0.0035686	0.043986	0.93534	imputed	0.984	N/A	N/A	N/A	N/A	N/A	N/A	a	g	-2.693	0.007073	----	a
1	2HPG	rs1025669	8	57480588	LOC442388 / PENK	N/A	N/A	N/A	N/A	N/A	N/A	N/A	N/A	G	A	0.78118	-0.13681	0.030614	7.86e-06	imputed	0.908	N/A	N/A	N/A	N/A	N/A	N/A	N/A	N/A	N/A	N/A	N/A	N/A	N/A	N/A	N/A	N/A	N/A	N/A	N/A	N/A	N/A	N/A	a	g	4.469	7.86e-06	+???	N/A
1	2HPG	rs2587000	8	97191828	C8orf37 / GDF6	T	C	0.13219	-0.087063	0.07767	0.26232	genotyped	1	T	C	0.049767	0.024059	0.055229	0.6631	genotyped	1	T	C	0.22385	-0.20888	0.046908	8.47e-06	genotyped	1	T	C	0.1371	0.03052	0.06454	0.63629	genotyped	1	T	C	0.2235	0.003603	0.04132	0.9305	t	c	-2.495	0.01261	+--+	t
1	2HPG	rs10977830	9	9505044	PTPRD	T	C	0.921139	0.45309	0.1022	9.29e-06	imputed	0.932	T	C	0.81438	-0.048447	0.031219	0.1207	imputed	0.924	N/A	N/A	N/A	N/A	N/A	N/A	N/A	N/A	N/A	N/A	N/A	N/A	N/A	N/A	N/A	N/A	N/A	N/A	N/A	N/A	N/A	N/A	t	c	1.743	0.08127	-?+?	N/A
1	2HPG	rs17713843	9	14527063	NFIB / ZDHHC21	G	A	0.929621	0.0086296	0.10261	0.93298	genotyped	1	G	A	0.974419	-0.35053	0.075904	3.87e-06	genotyped	1	N/A	N/A	N/A	N/A	N/A	N/A	N/A	N/A	N/A	N/A	N/A	N/A	N/A	N/A	N/A	N/A	N/A	N/A	N/A	N/A	N/A	N/A	a	g	3.426	0.0006131	+?-?	N/A
1	2HPG	rs10980112	9	111706304	PALM2	G	A	0.56365	-0.074147	0.053258	0.16386	genotyped	1	G	A	0.75256	-0.12187	0.02757	9.86e-06	genotyped	1	G	A	0.53767	-0.014418	0.038818	0.71033	genotyped	1	G	A	0.82186	-0.044455	0.058985	0.45106	imputed	0.99	N/A	N/A	N/A	N/A	N/A	N/A	a	g	3.368	0.0007581	++++	a
1	2HPG	rs12573114	10	4548326	LOC100128356 / LOC338588	G	A	0.86021	0.21096	0.079896	0.0082806	imputed	0.988	G	A	0.84539	0.085697	0.033126	0.0096818	imputed	0.975	G	A	0.78409	0.12566	0.048068	0.0089437	imputed	0.968	N/A	N/A	N/A	N/A	N/A	N/A	N/A	N/A	N/A	N/A	N/A	N/A	N/A	N/A	a	g	-4.501	6.77e-06	---?	a
1	2HPG	rs5030933	10	70645245	SUPV3L1 / HKDC1	T	C	0.5918	0.12085	0.054598	0.026861	genotyped	1	T	C	0.52372	-0.0049776	0.024121	0.83651	genotyped	1	T	C	0.72165	0.13208	0.042785	0.002021	genotyped	1	T	C	0.31367	0.18712	0.047266	7.53e-05	genotyped	1	N/A	N/A	N/A	N/A	N/A	N/A	t	c	4.602	4.19e-06	-+++	t
1	2HPG	rs5030937	10	70645903	SUPV3L1 / HKDC1	T	C	0.51163	0.21068	0.054052	9.71e-05	genotyped	1	T	C	0.20558	0.049137	0.029437	0.095077	genotyped	1	T	C	0.64647	0.17588	0.040198	1.21e-05	imputed	0.999	T	C	0.30263	0.19818	0.047449	2.96e-05	genotyped	1	N/A	N/A	N/A	N/A	N/A	N/A	t	c	7.075	1.5e-12	++++	t
1	2HPG	rs5030938	10	70645922	SUPV3L1 / HKDC1	T	C	0.51163	0.21068	0.054052	9.71e-05	genotyped	1	T	C	0.20838	0.048972	0.028997	0.091243	genotyped	1	T	C	0.64631	0.17494	0.040191	1.35e-05	genotyped	1	T	C	0.30263	0.19818	0.047449	2.96e-05	genotyped	1	N/A	N/A	N/A	N/A	N/A	N/A	t	c	7.072	1.53e-12	++++	t
1	2HPG	rs10998646	10	70646708	SUPV3L1 / HKDC1	T	G	0.36046	0.081252	0.056178	0.14808	genotyped	1	T	G	0.13581	0.063394	0.034874	0.0691	genotyped	1	T	G	0.56515	0.16227	0.038907	3.04e-05	imputed	0.992	T	G	0.15407	0.091239	0.061229	0.13619	genotyped	1	G	T	0.415	-0.1924	0.04522	2.18e-05	t	g	4.598	4.26e-06	++++	t
1	2HPG	rs10998647	10	70647314	SUPV3L1 / HKDC1	T	G	0.47482	-0.21986	0.054465	5.42e-05	imputed	0.975	N/A	N/A	N/A	N/A	N/A	N/A	N/A	N/A	T	G	0.35848	-0.18444	0.04121	7.62e-06	imputed	0.946	T	G	0.67409	-0.189	0.047471	6.85e-05	imputed	0.936	N/A	N/A	N/A	N/A	N/A	N/A	t	g	-7.2	6e-13	?---	t
1	2HPG	rs17566087	10	70648962	HKDC1	A	G	0.940024	0.43433	0.11226	0.00010936	genotyped	1	A	G	0.983256	0.10809	0.094722	0.25381	genotyped	1	A	G	0.932523	0.22574	0.078586	0.0040718	imputed	0.91	N/A	N/A	N/A	N/A	N/A	N/A	genotyped	NA	G	A	0.06455	-0.2083	0.07137	0.003554	a	g	4.453	8.47e-06	+++?	a
1	2HPG	rs5030941	10	70652736	HKDC1	T	C	0.37864	-0.16026	0.056797	0.004779	imputed	0.952	N/A	N/A	N/A	N/A	N/A	N/A	N/A	N/A	T	C	0.27271	-0.13587	0.044007	0.0020194	imputed	0.957	N/A	N/A	N/A	N/A	N/A	N/A	N/A	N/A	T	C	0.2611	-0.1462	0.05186	0.00486	t	c	-4.168	3.07e-05	?--?	t
1	2HPG	rs4746822	10	70652947	HKDC1	T	C	0.54307	0.24634	0.055028	7.58e-06	imputed	0.981	N/A	N/A	N/A	N/A	N/A	N/A	N/A	N/A	T	C	0.65099	0.17979	0.040595	9.48e-06	imputed	0.988	T	C	0.3508	0.17343	0.046086	0.00016773	imputed	0.955	C	T	0.3255	-0.2786	0.05405	2.78e-07	t	c	7.258	3.92e-13	?+++	t
1	2HPG	rs2394529	10	70655273	HKDC1	N/A	N/A	N/A	N/A	N/A	N/A	N/A	N/A	G	C	0.52574	-0.033262	0.024306	0.17115	imputed	0.926	G	C	0.35546	-0.18438	0.041439	8.61e-06	imputed	0.932	N/A	N/A	N/A	N/A	N/A	N/A	N/A	N/A	N/A	N/A	N/A	N/A	N/A	N/A	c	g	4.237	2.27e-05	++??	c
1	2HPG	rs4746825	10	70655651	HKDC1	T	C	0.37516	0.096254	0.05556	0.083195	imputed	0.999	T	C	0.1353	0.056029	0.035005	0.10947	imputed	0.976	T	C	0.57128	0.16296	0.038829	2.71e-05	imputed	0.999	T	C	0.16641	0.095291	0.058824	0.10525	imputed	0.997	N/A	N/A	N/A	N/A	N/A	N/A	t	c	4.695	2.66e-06	++++	t
1	2HPG	rs9645499	10	70656616	HKDC1	G	A	0.59547	-0.21886	0.055747	8.63e-05	genotyped	1	G	A	0.56605	-0.033241	0.023585	0.15871	genotyped	1	G	A	0.57498	-0.11872	0.039482	0.0026385	genotyped	1	G	A	0.70119	-0.11752	0.047364	0.013098	genotyped	1	A	G	0.4435	0.08999	0.04203	0.03238	a	g	5.326	1e-07	++++	a
1	2HPG	rs9645500	10	70656729	HKDC1	T	G	0.45753	-0.23389	0.054609	1.84e-05	imputed	0.994	T	G	0.53317	-0.035024	0.023528	0.13659	imputed	0.99	T	G	0.34675	-0.17923	0.04053	9.77e-06	imputed	0.993	T	G	0.65238	-0.16772	0.045281	0.00021222	genotyped	1	N/A	N/A	N/A	N/A	N/A	N/A	t	g	-6.934	4.1e-12	----	t
1	2HPG	rs9645501	10	70656772	HKDC1	G	A	0.62672	-0.088988	0.055466	0.10863	imputed	0.999	G	A	0.86435	-0.055389	0.035022	0.11375	imputed	0.974	G	A	0.43277	-0.16089	0.038927	3.58e-05	imputed	0.993	G	A	0.83403	-0.10146	0.058973	0.085352	imputed	1	N/A	N/A	N/A	N/A	N/A	N/A	a	g	4.648	3.36e-06	++++	a
1	2HPG	rs10823320	10	70657066	HKDC1	A	G	0.977356	0.56872	0.17839	0.0014325	genotyped	1	N/A	N/A	N/A	N/A	N/A	N/A	genotyped	NA	A	G	0.94989	0.29572	0.087624	0.00073848	genotyped	1	N/A	N/A	N/A	N/A	N/A	N/A	genotyped	NA	N/A	N/A	N/A	N/A	N/A	N/A	a	g	4.62	3.84e-06	?++?	a
1	2HPG	rs10762266	10	70657325	HKDC1	T	G	0.28825	0.18053	0.058636	0.0020788	genotyped	1	T	G	0.11023	0.034648	0.038128	0.36349	genotyped	1	T	G	0.30395	0.062404	0.042469	0.14173	genotyped	1	T	G	0.1944	0.25343	0.054764	3.7e-06	genotyped	1	N/A	N/A	N/A	N/A	N/A	N/A	t	g	4.968	6.75e-07	++++	t
1	2HPG	rs7923953	10	70658042	HKDC1	T	C	0.69675	-0.1895	0.05797	0.0010798	imputed	0.997	T	C	0.63947	-0.016919	0.025246	0.50276	imputed	0.975	T	C	0.69337	-0.064188	0.04235	0.1296	imputed	0.998	T	C	0.77041	-0.20907	0.05154	4.98e-05	imputed	0.988	N/A	N/A	N/A	N/A	N/A	N/A	t	c	-4.664	3.1e-06	----	t
1	2HPG	rs1983127	10	70659907	HKDC1	T	G	0.47368	-0.18238	0.053007	0.00058031	genotyped	1	T	G	0.32744	-0.020157	0.02553	0.42981	genotyped	1	T	G	0.406	-0.13508	0.039529	0.00063247	genotyped	1	N/A	N/A	N/A	N/A	N/A	N/A	N/A	N/A	T	G	0.3856	-0.2106	0.04725	8.72e-06	t	g	-4.389	1.14e-05	---?	t
1	2HPG	rs4746827	10	70662052	HKDC1	G	A	0.56966	-0.25574	0.057561	8.87e-06	imputed	0.91	N/A	N/A	N/A	N/A	N/A	N/A	N/A	N/A	G	A	0.58987	-0.11074	0.039791	0.0053852	imputed	0.944	G	A	0.73832	-0.10983	0.052637	0.036927	imputed	0.95	A	G	0.4404	0.02992	0.03964	0.4504	a	g	5.2	1.99e-07	?+++	a
1	2HPG	rs12266369	10	84824782	NRG3 / LOC728027	T	C	0.70384	-0.26957	0.060603	8.66e-06	imputed	0.995	T	C	0.64679	0.010792	0.025186	0.6683	imputed	0.995	T	C	0.71479	-0.025249	0.042593	0.55332	imputed	0.998	T	C	0.42148	0.064061	0.046009	0.16382	genotyped	1	N/A	N/A	N/A	N/A	N/A	N/A	t	c	-1.309	0.1904	+--+	t
1	2HPG	rs12266381	10	84824837	NRG3 / LOC728027	T	C	0.70339	-0.26963	0.060621	8.68e-06	imputed	0.993	T	C	0.65707	0.0097533	0.025852	0.70597	imputed	0.941	T	C	0.71478	-0.025246	0.042594	0.55338	imputed	0.998	T	C	0.42175	0.06424	0.046034	0.16287	imputed	0.999	N/A	N/A	N/A	N/A	N/A	N/A	t	c	-1.333	0.1826	+--+	t
1	2HPG	rs4478935	10	84825565	NRG3 / LOC728027	T	C	0.29662	0.2696	0.060489	8.31e-06	imputed	0.999	T	C	0.33761	-0.0077885	0.026029	0.76477	imputed	0.925	T	C	0.28567	0.025242	0.042621	0.55369	imputed	0.996	T	C	0.57808	-0.062841	0.046076	0.17261	imputed	0.998	N/A	N/A	N/A	N/A	N/A	N/A	t	c	1.391	0.1642	-++-	t
1	2HPG	rs4144220	10	84825845	NRG3 / LOC728027	T	C	0.70328	-0.26969	0.0605	8.29e-06	imputed	0.999	T	C	0.66214	0.0078033	0.026036	0.7644	imputed	0.924	T	C	0.71456	-0.02527	0.042607	0.55312	imputed	0.997	T	C	0.42191	0.062576	0.046079	0.17446	imputed	0.997	N/A	N/A	N/A	N/A	N/A	N/A	t	c	-1.395	0.1631	+--+	t
1	2HPG	rs1673666	10	112060383	SMNDC1 / LOC645360	A	G	0.88901	-0.26624	0.087446	0.0023299	imputed	0.966	N/A	N/A	N/A	N/A	N/A	N/A	N/A	N/A	A	G	0.79527	-0.15978	0.048701	0.0010354	imputed	0.99	N/A	N/A	N/A	N/A	N/A	N/A	N/A	N/A	N/A	N/A	N/A	N/A	N/A	N/A	a	g	-4.458	8.29e-06	?--?	a
1	2HPG	rs7980712	12	16042955	DERA	G	A	0.098531	0.039189	0.089203	0.66043	genotyped	1	G	A	0.21535	0.012625	0.02963	0.67005	genotyped	1	G	A	0.15069	-0.030803	0.055283	0.5774	genotyped	1	G	A	0.017403	0.78175	0.17058	4.58e-06	genotyped	1	N/A	N/A	N/A	N/A	N/A	N/A	a	g	-2.45	0.01427	-+--	a
1	2HPG	rs12578638	12	44047374	TMEM16F	G	A	0.061568	-0.51863	0.1154	6.98e-06	imputed	0.986	G	A	0.069396	-0.06625	0.047294	0.16127	genotyped	0.989	G	A	0.030169	6.92e-06	0.11554	0.99995	imputed	0.98	G	A	0.080083	0.02268	0.081908	0.78186	imputed	0.988	N/A	N/A	N/A	N/A	N/A	N/A	a	g	2.475	0.01331	+-+-	a
1	2HPG	rs9788104	12	44060007	TMEM16F	T	C	0.061374	-0.51917	0.11513	6.49e-06	imputed	0.994	T	C	0.069035	-0.064834	0.0474	0.17137	imputed	0.99	T	C	0.029662	-0.0052799	0.11524	0.96346	imputed	0.999	T	C	0.081494	0.015024	0.081184	0.85318	genotyped	1	N/A	N/A	N/A	N/A	N/A	N/A	t	c	-2.538	0.01113	---+	t
1	2HPG	rs17095830	12	44061175	TMEM16F	G	A	0.064259	-0.50882	0.11152	5.05e-06	genotyped	1	G	A	0.19163	-0.032864	0.031427	0.29567	genotyped	1	G	A	0.029993	0.0063115	0.1146	0.95608	genotyped	1	G	A	0.082363	0.025571	0.080877	0.75187	imputed	1	N/A	N/A	N/A	N/A	N/A	N/A	a	g	2.279	0.02266	+-+-	a
1	2HPG	rs7299292	12	44063186	TMEM16F	G	A	0.937219	0.52078	0.11435	5.25e-06	imputed	0.973	G	A	0.80771	0.032974	0.03145	0.29443	imputed	0.996	G	A	0.970282	-0.010832	0.11601	0.92561	imputed	0.979	G	A	0.917992	-0.025795	0.081264	0.75092	imputed	0.994	N/A	N/A	N/A	N/A	N/A	N/A	a	g	-2.255	0.02413	-+-+	a
1	2HPG	rs7302635	12	44066940	TMEM16F	T	A	0.935361	0.50891	0.11156	5.07e-06	imputed	0.993	T	A	0.80671	0.029509	0.031436	0.34788	imputed	0.996	T	A	0.969411	-0.0040738	0.11432	0.97157	imputed	0.982	T	A	0.917232	-0.025737	0.080898	0.75038	imputed	0.994	N/A	N/A	N/A	N/A	N/A	N/A	a	t	-2.236	0.02536	-+-+	a
1	2HPG	rs7296058	12	44069517	TMEM16F	T	C	0.06457	-0.51004	0.11176	5.03e-06	imputed	0.99	T	C	0.19296	-0.029808	0.031441	0.34309	imputed	0.996	T	C	0.029938	0.0098378	0.11548	0.93211	imputed	0.983	T	C	0.082597	0.025682	0.080905	0.75091	imputed	0.997	N/A	N/A	N/A	N/A	N/A	N/A	t	c	-2.214	0.02682	-+-+	t
1	2HPG	rs7312150	12	44069855	TMEM16F	C	A	0.064392	-0.50901	0.11152	5.01e-06	imputed	0.998	C	A	0.19281	-0.029811	0.031438	0.34302	imputed	0.997	C	A	0.032088	0.00519	0.11471	0.96391	imputed	0.933	C	A	0.082343	0.025536	0.080873	0.75219	genotyped	1	N/A	N/A	N/A	N/A	N/A	N/A	a	c	2.237	0.02526	+-+-	a
1	2HPG	rs7138332	12	44074008	TMEM16F	G	A	0.935741	0.50882	0.11152	5.05e-06	genotyped	1	G	A	0.80698	0.028762	0.031392	0.35955	genotyped	1	G	A	0.969816	-0.0066209	0.11466	0.95395	imputed	0.993	G	A	0.916921	-0.025941	0.080952	0.74863	imputed	0.99	N/A	N/A	N/A	N/A	N/A	N/A	a	g	-2.212	0.02699	-+-+	a
1	2HPG	rs7305618	12	119887315	LOC643550 / C12orf27	T	C	0.1683	-0.11614	0.070286	0.098466	genotyped	1	T	C	0.39721	0.013532	0.024752	0.58459	genotyped	1	T	C	0.23884	-0.21077	0.044905	2.68e-06	genotyped	1	T	C	0.65743	0.017473	0.046338	0.70611	genotyped	1	T	C	0.2441	-0.04292	0.03935	0.2755	t	c	-2.851	0.00436	+--+	t
1	2HPG	rs2297210	13	74796597	TBC1D4	N/A	N/A	N/A	N/A	N/A	N/A	N/A	N/A	C	A	0.60097	0.1086	0.024306	7.89e-06	genotyped	0.998	C	A	0.37576	0.054045	0.041261	0.19025	genotyped	0.987	C	A	0.19822	-0.069129	0.054912	0.20807	genotyped	1	N/A	N/A	N/A	N/A	N/A	N/A	a	c	-2.522	0.01168	--?+	a
1	2HPG	rs4145677	14	31920334	AKAP6	T	C	0.86472	0.033799	0.07891	0.66841	imputed	0.985	T	C	0.973226	-0.022396	0.07529	0.76611	imputed	0.968	T	C	0.85143	-0.069463	0.055338	0.20939	imputed	0.999	T	C	0.62429	0.21658	0.044626	1.22e-06	imputed	0.981	N/A	N/A	N/A	N/A	N/A	N/A	t	c	1.841	0.06558	--++	t
1	2HPG	rs3784177	14	31921354	AKAP6	C	A	0.1824	-0.07323	0.069587	0.29264	genotyped	1	C	A	0.029783	0.042363	0.070836	0.54981	genotyped	0.996	C	A	0.1605	0.081957	0.053443	0.12514	genotyped	0.998	C	A	0.38243	-0.21818	0.044333	8.59e-07	genotyped	1	N/A	N/A	N/A	N/A	N/A	N/A	a	c	1.842	0.06551	--++	a
1	2HPG	rs8020615	14	31928189	AKAP6	T	C	0.21246	-0.070266	0.067271	0.29624	imputed	0.945	T	C	0.2291	-0.026973	0.029291	0.35714	imputed	0.955	T	C	0.21136	0.081971	0.047581	0.084934	imputed	0.976	T	C	0.47505	-0.21736	0.044211	8.82e-07	imputed	0.961	N/A	N/A	N/A	N/A	N/A	N/A	t	c	-2.478	0.0132	-+--	t
1	2HPG	rs1428801	16	9456460	LOC653737 / GRIN2A	T	C	0.31395	0.025713	0.058182	0.65853	genotyped	1	T	C	0.28605	-0.12853	0.02769	3.45e-06	genotyped	1	T	C	0.40527	-0.001231	0.039671	0.97525	genotyped	1	T	C	0.47098	0.011142	0.04592	0.80828	imputed	0.977	N/A	N/A	N/A	N/A	N/A	N/A	t	c	-1.987	0.04688	--++	t
1	2HPG	rs9930055	16	9464414	LOC653737 / GRIN2A	C	A	0.6794	-0.01935	0.057994	0.73864	imputed	0.985	C	A	0.72251	0.12842	0.028067	4.75e-06	imputed	0.948	C	A	0.58589	-0.010289	0.039983	0.79692	imputed	0.978	C	A	0.53116	-0.0055749	0.045371	0.90221	imputed	0.99	N/A	N/A	N/A	N/A	N/A	N/A	a	c	-1.903	0.05707	-+++	a
1	2HPG	rs7196141	16	16987424	LOC441750 / XYLT1	T	C	0.962143	-0.19904	0.14297	0.16386	imputed	0.965	T	C	0.7238	-0.087401	0.027707	0.0016076	imputed	0.957	N/A	N/A	N/A	N/A	N/A	N/A	N/A	N/A	T	C	0.960102	-0.3427	0.11407	0.0026612	genotyped	1	N/A	N/A	N/A	N/A	N/A	N/A	t	c	-4.446	8.75e-06	-?--	N/A
1	2HPG	rs17257857	16	50629616	LOC642659 / TOX3	T	C	0.24844	0.2851	0.062691	5.42e-06	genotyped	1	T	C	0.024651	-0.029214	0.078713	0.71053	genotyped	1	T	C	0.2286	0.016526	0.046847	0.72426	genotyped	1	T	C	0.34211	0.029095	0.046588	0.53229	genotyped	1	N/A	N/A	N/A	N/A	N/A	N/A	t	c	2.286	0.02223	-+++	t
1	2HPG	rs7198446	16	86936870	LOC100128913 / ZNF469	C	A	0.336	-0.033029	0.056665	0.55997	genotyped	1	C	A	0.62012	0.11056	0.024356	5.64e-06	genotyped	0.998	C	A	0.47295	0.0037219	0.039671	0.92525	genotyped	1	C	A	0.29881	0.018963	0.04812	0.69352	genotyped	1	N/A	N/A	N/A	N/A	N/A	N/A	a	c	-2.239	0.02513	--+-	a
1	2HPG	rs12951303	17	71547707	SRP68	G	A	0.981071	-0.89184	0.216	3.65e-05	imputed	0.909	G	A	0.906786	-0.098974	0.041733	0.017711	imputed	0.982	N/A	N/A	N/A	N/A	N/A	N/A	N/A	N/A	N/A	N/A	N/A	N/A	N/A	N/A	N/A	N/A	N/A	N/A	N/A	N/A	N/A	N/A	a	g	4.501	6.77e-06	+?+?	N/A
1	FCP	rs7417283	1	108105209	VAV3	T	C	0.68911	0.0092073	0.0087266	0.29139	imputed	0.983	T	C	0.69391	0.043013	0.0085004	4.19e-07	imputed	0.982	T	C	0.81765	0.008647	0.0086112	0.3153	imputed	0.939	N/A	N/A	N/A	N/A	N/A	N/A	N/A	N/A	N/A	N/A	N/A	N/A	N/A	N/A	t	c	4.079	4.51e-05	+++?	t
1	FCP	rs7514025	1	108109165	VAV3	T	C	0.68666	0.0092828	0.0086492	0.28315	genotyped	1	T	C	0.69531	0.042053	0.0084409	6.29e-07	genotyped	1	T	C	0.82162	0.0092546	0.0086714	0.28586	imputed	0.943	T	C	0.76087	-0.0014397	0.0082955	0.86221	imputed	0.927	N/A	N/A	N/A	N/A	N/A	N/A	t	c	3.409	0.000652	+++-	t
1	FCP	rs6690837	1	108114179	VAV3	T	C	0.3342	-0.0089381	0.0086208	0.29983	imputed	0.981	T	C	0.33093	-0.041231	0.0085068	1.25e-06	imputed	0.929	T	C	0.21872	-0.0096328	0.0078975	0.22257	imputed	0.977	T	C	0.2848	0.0023708	0.0076938	0.75797	genotyped	1	N/A	N/A	N/A	N/A	N/A	N/A	t	c	-3.342	0.0008313	---+	t
1	FCP	rs6583048	1	108114781	VAV3	T	C	0.67381	0.011193	0.0086019	0.19319	genotyped	1	T	C	0.69296	0.041477	0.0084151	8.27e-07	genotyped	1	T	C	0.7917	0.010868	0.0080175	0.17526	imputed	0.992	T	C	0.73276	-0.0015216	0.0080666	0.85039	imputed	0.921	C	T	0.2194	-0.005868	0.006536	0.3694	t	c	3.633	0.00028	+++-	t
1	FCP	rs4914959	1	108120602	VAV3	G	A	0.31212	-0.010347	0.0086894	0.23377	genotyped	1	G	A	0.30188	-0.041236	0.0084474	1.05e-06	genotyped	1	G	A	0.19016	-0.0097341	0.008247	0.23787	genotyped	1	G	A	0.23132	9.69e-05	0.0081633	0.99053	genotyped	1	N/A	N/A	N/A	N/A	N/A	N/A	a	g	3.556	0.000376	+++-	a
1	FCP	rs4914960	1	108122836	VAV3	G	A	0.68653	0.009564	0.0087212	0.2728	imputed	0.991	G	A	0.69737	0.040339	0.0084552	1.83e-06	imputed	0.999	G	A	0.80956	0.0096809	0.0082517	0.24072	imputed	0.998	G	A	0.76855	1.32e-05	0.0081865	0.99872	imputed	0.997	N/A	N/A	N/A	N/A	N/A	N/A	a	g	-3.465	0.000531	----	a
1	FCP	rs4514263	1	108127033	VAV3	G	A	0.32641	-0.01148	0.0086043	0.18215	imputed	0.999	G	A	0.31715	-0.041028	0.0084276	1.13e-06	imputed	0.978	G	A	0.20804	-0.010581	0.0080058	0.18627	imputed	0.995	G	A	0.28272	0.0022019	0.0077046	0.77504	imputed	0.999	N/A	N/A	N/A	N/A	N/A	N/A	a	g	3.549	0.0003872	+++-	a
1	FCP	rs11185177	1	108127261	VAV3	G	A	0.32759	-0.011785	0.0086164	0.1714	imputed	0.996	G	A	0.31762	-0.041904	0.0084302	6.67e-07	imputed	0.978	G	A	0.20802	-0.010568	0.0080069	0.1869	imputed	0.995	G	A	0.28264	0.0022085	0.0077041	0.77437	imputed	0.999	N/A	N/A	N/A	N/A	N/A	N/A	a	g	3.612	0.000304	+++-	a
1	FCP	rs11185178	1	108131449	VAV3	T	G	0.31413	-0.010324	0.0087748	0.23939	imputed	0.978	T	G	0.30001	-0.044883	0.0085569	1.56e-07	imputed	0.986	T	G	0.19415	-0.0098771	0.0083126	0.23475	imputed	0.97	T	G	0.2275	-0.0032045	0.0082282	0.69694	genotyped	1	N/A	N/A	N/A	N/A	N/A	N/A	t	g	-3.94	8.14e-05	----	t
1	FCP	rs4914961	1	108135286	VAV3	T	C	0.30966	-0.010596	0.0087252	0.22461	imputed	1	T	C	0.29639	-0.045269	0.0085443	1.17e-07	imputed	0.998	T	C	0.1901	-0.0095344	0.0083127	0.2514	imputed	0.993	T	C	0.22776	-0.0033047	0.0082282	0.68796	imputed	0.999	N/A	N/A	N/A	N/A	N/A	N/A	t	c	-3.966	7.31e-05	----	t
1	FCP	rs4244133	1	108136145	VAV3	T	C	0.31089	-0.010566	0.0087305	0.22617	genotyped	1	T	C	0.29671	-0.045261	0.0085374	1.15e-07	genotyped	1	T	C	0.19318	-0.010267	0.0082716	0.21453	genotyped	0.999	T	C	0.22784	-0.0032945	0.0082366	0.68917	imputed	0.996	N/A	N/A	N/A	N/A	N/A	N/A	t	c	-4.017	5.89e-05	----	t
1	FCP	rs1980798	1	235338762	RYR2	T	G	0.32069	0.028033	0.0089282	0.0016901	genotyped	1	T	G	0.59202	0.0085035	0.0080522	0.29095	genotyped	0.999	T	G	0.48099	0.013147	0.0064245	0.040725	genotyped	0.999	T	G	0.4635	0.021743	0.0071201	0.0022597	genotyped	1	N/A	N/A	N/A	N/A	N/A	N/A	t	g	4.58	4.66e-06	++++	t
1	FCP	rs1862650	2	8081681	LOC100129581 / C2orf46	G	C	0.83584	-0.018178	0.01123	0.1055	imputed	0.997	G	C	0.72749	0.0047702	0.0088985	0.59191	imputed	0.996	G	C	0.977612	-0.096776	0.021865	9.6e-06	imputed	0.99	G	C	0.917194	-0.007146	0.012485	0.56706	imputed	0.99	N/A	N/A	N/A	N/A	N/A	N/A	c	g	3.184	0.00145	-+++	c
1	FCP	rs6431918	2	8083969	LOC100129581 / C2orf46	G	A	0.83578	-0.018204	0.011223	0.10481	imputed	0.998	G	A	0.72734	0.0048751	0.008887	0.5833	imputed	0.998	G	A	0.977602	-0.096265	0.021758	9.67e-06	imputed	0.999	G	A	0.916773	-0.0070473	0.012417	0.57034	imputed	0.999	N/A	N/A	N/A	N/A	N/A	N/A	a	g	3.176	0.001491	-+++	a
1	FCP	rs7608354	2	8083992	LOC100129581 / C2orf46	G	A	0.83599	-0.01819	0.01122	0.10498	genotyped	1	G	A	0.7277	0.0048939	0.0088809	0.5816	genotyped	1	G	A	0.977606	-0.096195	0.021745	9.7e-06	genotyped	1	G	A	0.91681	-0.0070453	0.012416	0.57042	genotyped	1	N/A	N/A	N/A	N/A	N/A	N/A	a	g	3.174	0.001501	-+++	a
1	FCP	rs1260326	2	27584444	GCKR	T	C	0.32987	-0.025102	0.0089347	0.0049614	genotyped	1	T	C	0.12254	-0.011557	0.012085	0.33894	genotyped	1	T	C	0.39794	-0.018537	0.0065351	0.0045604	genotyped	1	T	C	0.34253	-0.014373	0.0072604	0.047745	genotyped	1	T	C	0.4093	-0.01232	0.005537	0.0262	t	c	-4.273	1.93e-05	----	t
1	FCP	rs780094	2	27594741	GCKR	T	C	0.33476	-0.024147	0.0088676	0.0064681	genotyped	1	T	C	0.17981	-0.020793	0.010434	0.046287	genotyped	1	T	C	0.39024	-0.020441	0.0065248	0.0017317	genotyped	1	T	C	0.32258	-0.011828	0.0074589	0.11278	genotyped	1	N/A	N/A	N/A	N/A	N/A	N/A	t	c	-4.706	2.53e-06	----	t
1	FCP	rs1260333	2	27602128	GCKR / LOC100130981	G	A	0.63319	0.021068	0.008639	0.014737	imputed	0.987	G	A	0.61411	0.0092925	0.0082031	0.2573	genotyped	0.914	G	A	0.5503	0.019294	0.0064586	0.0028142	genotyped	1	G	A	0.67312	0.0076206	0.0075768	0.31452	imputed	0.967	A	G	0.4454	-0.01085	0.0054	0.04463	a	g	-3.781	0.0001561	----	a
1	FCP	rs11899123	2	155106545	GALNT13 / KCNJ3	T	C	0.975074	0.0098513	0.027422	0.71941	imputed	0.909	T	C	0.89241	-0.057585	0.013013	9.64e-06	imputed	0.926	N/A	N/A	N/A	N/A	N/A	N/A	N/A	N/A	T	C	0.985569	0.001684	0.02942	0.95436	genotyped	1	N/A	N/A	N/A	N/A	N/A	N/A	t	c	-2.389	0.01687	-?++	N/A
1	FCP	rs6758849	2	180709475	KIAA1604 / LOC729009	C	A	0.3112	0.010674	0.0092141	0.24669	imputed	0.925	N/A	N/A	N/A	N/A	N/A	N/A	N/A	N/A	C	A	0.22018	0.038249	0.0081965	3.06e-06	imputed	0.949	N/A	N/A	N/A	N/A	N/A	N/A	N/A	N/A	N/A	N/A	N/A	N/A	N/A	N/A	a	c	-4.399	1.09e-05	?--?	a
1	FCP	rs13404412	2	180711995	KIAA1604 / LOC729009	T	C	0.66826	-0.0089364	0.0088469	0.31244	imputed	0.983	T	C	0.64551	-0.0023313	0.0085126	0.78419	imputed	0.924	T	C	0.7611	-0.044404	0.0078385	1.47e-08	imputed	0.981	T	C	0.77801	0.0023791	0.0082462	0.77296	imputed	0.994	N/A	N/A	N/A	N/A	N/A	N/A	t	c	-3.564	0.0003658	---+	t
1	FCP	rs982813	2	180713919	KIAA1604 / LOC729009	G	C	0.66521	-0.0099674	0.0088142	0.25813	imputed	0.987	G	C	0.64914	-0.0026793	0.0084803	0.75204	imputed	0.939	G	C	0.75951	-0.044833	0.0078652	1.2e-08	imputed	0.97	G	C	0.77745	0.0027192	0.0082782	0.74255	imputed	0.98	C	G	0.2297	0.00483	0.00645	0.4541	c	g	3.635	0.0002779	+++-	c
1	FCP	rs2176547	2	180715230	KIAA1604 / LOC729009	G	A	0.29498	0.00953	0.0092264	0.30165	imputed	0.991	G	A	0.3237	0.00086305	0.0086144	0.9202	imputed	0.946	G	A	0.19441	0.03966	0.0083849	2.25e-06	imputed	0.983	G	A	0.21491	-0.0016849	0.0084096	0.8412	imputed	0.99	N/A	N/A	N/A	N/A	N/A	N/A	a	g	-3.015	0.002572	---+	a
1	FCP	rs1529124	2	180716222	KIAA1604 / LOC729009	T	A	0.70231	-0.0098436	0.0092081	0.28506	imputed	0.989	T	A	0.66548	0.00040479	0.0084714	0.96189	imputed	0.967	T	A	0.80476	-0.039762	0.0083431	1.88e-06	imputed	0.988	T	A	0.77942	0.0021185	0.0084183	0.8013	imputed	0.97	N/A	N/A	N/A	N/A	N/A	N/A	a	t	2.951	0.003166	-++-	a
1	FCP	rs11884030	2	180717079	KIAA1604 / LOC729009	G	A	0.29559	0.0097962	0.009198	0.28686	genotyped	1	G	A	0.34225	0.0014254	0.0084726	0.8664	genotyped	1	G	A	0.19387	0.040052	0.0083213	1.49e-06	imputed	0.997	G	A	0.21482	-0.0016599	0.0084152	0.84363	imputed	0.989	N/A	N/A	N/A	N/A	N/A	N/A	a	g	-3.11	0.001872	---+	a
1	FCP	rs11884036	2	180717120	KIAA1604 / LOC729009	T	A	0.29499	0.0097809	0.0092173	0.28863	imputed	0.996	T	A	0.32819	-0.00029743	0.0083815	0.97169	imputed	1	T	A	0.19386	0.040052	0.0083212	1.48e-06	imputed	0.997	T	A	0.2148	-0.0016578	0.008416	0.84385	imputed	0.989	N/A	N/A	N/A	N/A	N/A	N/A	a	t	-3.008	0.002627	+--+	a
1	FCP	rs11900518	2	180717205	KIAA1604 / LOC729009	T	C	0.67136	-0.0088988	0.0088275	0.31342	genotyped	1	T	C	0.65399	-0.0027191	0.0082881	0.74286	genotyped	1	T	C	0.76248	-0.044826	0.007773	8.07e-09	genotyped	1	T	C	0.77961	0.0026097	0.0082751	0.75248	imputed	0.99	N/A	N/A	N/A	N/A	N/A	N/A	t	c	-3.632	0.0002812	---+	t
1	FCP	rs11900565	2	180717248	KIAA1604 / LOC729009	T	C	0.67075	-0.009201	0.0088313	0.29748	genotyped	1	T	C	0.63991	-0.0044876	0.0083953	0.59298	genotyped	1	T	C	0.76248	-0.044826	0.007773	8.07e-09	genotyped	1	T	C	0.77756	0.0021778	0.0082667	0.79221	imputed	0.98	N/A	N/A	N/A	N/A	N/A	N/A	t	c	-3.775	0.0001602	---+	t
1	FCP	rs11689740	2	180725096	KIAA1604 / LOC729009	G	C	0.32465	0.0086335	0.0091302	0.34435	imputed	0.93	G	C	0.37017	0.0054315	0.0086159	0.52843	imputed	0.928	G	C	0.23344	0.048612	0.0080212	1.36e-09	imputed	0.957	G	C	0.21775	-0.0039933	0.0084824	0.6378	imputed	0.963	N/A	N/A	N/A	N/A	N/A	N/A	c	g	-3.836	0.0001249	---+	c
1	FCP	rs7580896	2	180791941	KIAA1604 / LOC729009	G	A	0.35067	0.010697	0.0085588	0.21138	genotyped	1	G	A	0.11502	0.014515	0.012149	0.23217	genotyped	1	G	A	0.2757	0.03222	0.0072583	9.04e-06	genotyped	1	N/A	N/A	N/A	N/A	N/A	N/A	N/A	N/A	G	A	0.2659	0.01315	0.006108	0.03142	a	g	-4.188	2.81e-05	---?	a
1	FCP	rs10497564	2	180794738	KIAA1604 / LOC729009	N/A	N/A	N/A	N/A	N/A	N/A	N/A	N/A	N/A	N/A	N/A	N/A	N/A	N/A	N/A	N/A	T	C	0.27421	0.033645	0.007505	7.36e-06	imputed	0.92	T	C	0.24024	0.00926	0.0081901	0.25821	genotyped	1	N/A	N/A	N/A	N/A	N/A	N/A	t	c	4.053	5.06e-05	?+?+	t
1	FCP	rs2368139	2	180799186	KIAA1604 / LOC729009	T	C	0.28519	0.017214	0.0089499	0.054436	genotyped	1	T	C	0.24225	0.024712	0.0092378	0.0074717	genotyped	1	T	C	0.26799	0.026989	0.0073693	0.00024987	genotyped	1	T	C	0.24115	0.0071309	0.0082087	0.38501	imputed	0.988	T	C	0.2587	0.01601	0.006112	0.00887	t	c	4.62	3.83e-06	++++	t
1	FCP	rs2368141	2	180800269	KIAA1604 / LOC729009	T	A	0.70391	-0.018797	0.0091708	0.040395	imputed	0.916	T	A	0.75201	-0.023814	0.009361	0.010961	imputed	0.936	T	A	0.72261	-0.027724	0.0075924	0.00026069	imputed	0.923	T	A	0.75414	-0.0068461	0.0084381	0.41718	imputed	0.917	N/A	N/A	N/A	N/A	N/A	N/A	a	t	4.575	4.77e-06	++++	a
1	FCP	rs7578753	2	180809183	KIAA1604 / LOC729009	C	A	0.71359	-0.016248	0.0089818	0.070459	imputed	0.991	C	A	0.74594	-0.024351	0.0091493	0.0077797	imputed	0.987	C	A	0.73199	-0.027267	0.0073838	0.00022175	imputed	0.994	C	A	0.76035	-0.006594	0.0082126	0.42202	imputed	0.982	N/A	N/A	N/A	N/A	N/A	N/A	a	c	4.548	5.43e-06	++++	a
1	FCP	rs3936728	2	180830162	KIAA1604 / LOC729009	G	A	0.29544	0.016705	0.0089814	0.062892	imputed	0.987	G	A	0.26627	0.022652	0.0091366	0.013167	imputed	0.966	G	A	0.27766	0.025689	0.0072251	0.0003773	imputed	0.998	G	A	0.25127	0.0068567	0.0079826	0.39037	genotyped	1	N/A	N/A	N/A	N/A	N/A	N/A	a	g	-4.433	9.31e-06	----	a
1	FCP	rs6755569	2	180886001	KIAA1604 / LOC729009	T	C	0.29613	0.018435	0.0089902	0.040307	imputed	0.987	T	C	0.26746	0.015622	0.0091229	0.086831	imputed	0.967	T	C	0.27346	0.025792	0.0073086	0.0004172	imputed	0.983	T	C	0.24066	0.0066618	0.0080585	0.40842	genotyped	1	T	C	0.2765	0.01273	0.005916	0.03157	t	c	4.107	4.01e-05	++++	t
1	FCP	rs1865160	3	510673	CHL1 / LOC402123	T	C	0.54835	0.011181	0.0084049	0.18341	genotyped	1	T	C	0.58826	0.0083796	0.0079838	0.29391	genotyped	1	T	C	0.56828	0.023814	0.0066182	0.00032029	genotyped	1	T	C	0.59041	0.01889	0.0072448	0.0091258	genotyped	1	N/A	N/A	N/A	N/A	N/A	N/A	t	c	4.43	9.44e-06	++++	t
1	FCP	rs10510916	3	64117479	PRICKLE2	G	C	0.89218	0.008852	0.014385	0.53833	imputed	0.908	G	C	0.80941	-0.0072329	0.010808	0.50334	imputed	0.915	G	C	0.7677	0.035985	0.008077	8.38e-06	imputed	0.926	N/A	N/A	N/A	N/A	N/A	N/A	N/A	N/A	N/A	N/A	N/A	N/A	N/A	N/A	c	g	-2.812	0.004921	+--?	c
1	FCP	rs17720698	3	64117899	PRICKLE2	T	C	0.11144	-0.0065545	0.013903	0.63733	imputed	0.928	T	C	0.30226	0.00019287	0.0088823	0.98268	genotyped	1	T	C	0.23354	-0.035432	0.0078706	6.74e-06	imputed	0.979	T	C	0.050085	-0.012333	0.015551	0.42772	genotyped	1	N/A	N/A	N/A	N/A	N/A	N/A	t	c	-3.1	0.001937	+---	t
1	FCP	rs17720836	3	64123112	PRICKLE2	T	C	0.10894	-0.0086944	0.01375	0.52718	genotyped	1	T	C	0.15446	-0.0019173	0.011228	0.86441	genotyped	1	T	C	0.23164	-0.036011	0.0078144	4.06e-06	genotyped	1	T	C	0.050024	-0.0083779	0.01644	0.61034	imputed	0.917	N/A	N/A	N/A	N/A	N/A	N/A	t	c	-3.176	0.001492	----	t
1	FCP	rs2029756	3	150165893	CPA3 / UBQLN4P	G	A	0.72406	-0.02648	0.0096215	0.0059197	imputed	0.953	G	A	0.952961	-0.041502	0.019465	0.032998	imputed	0.933	G	A	0.74571	-0.015759	0.007581	0.037639	imputed	0.931	G	A	0.61884	-0.016627	0.0070844	0.018928	genotyped	1	N/A	N/A	N/A	N/A	N/A	N/A	a	g	4.594	4.34e-06	++++	a
1	FCP	rs13185628	5	178827431	ADAMTS2 / LOC100128622	C	T	0.935741	0.016108	0.016671	0.33395	genotyped	1	C	T	0.988263	-0.17802	0.037017	1.52e-06	genotyped	1	C	T	0.900509	-0.012957	0.010873	0.23336	genotyped	1	N/A	N/A	N/A	N/A	N/A	N/A	N/A	N/A	N/A	N/A	N/A	N/A	N/A	N/A	t	c	3.043	0.002343	++-?	t
1	FCP	rs220693	6	46918923	MEP1A / GPR116	T	C	0.75398	-0.041232	0.0093285	9.87e-06	genotyped	1	T	C	0.58028	-0.013167	0.0081669	0.1069	genotyped	1	T	C	0.64464	-0.0014127	0.0067469	0.83415	genotyped	1	T	C	0.58955	1.27e-05	0.0071876	0.99859	genotyped	1	N/A	N/A	N/A	N/A	N/A	N/A	t	c	-2.806	0.00501	---+	t
1	FCP	rs7743203	6	96309583	MANEA / KRT18P50	C	T	0.961716	-0.00397	0.020867	0.84911	imputed	0.98	C	T	0.967449	-0.1061	0.022823	3.34e-06	imputed	0.987	N/A	N/A	N/A	N/A	N/A	N/A	N/A	N/A	N/A	N/A	N/A	N/A	N/A	N/A	N/A	N/A	N/A	N/A	N/A	N/A	N/A	N/A	t	c	3.622	0.0002919	+?+?	N/A
1	FCP	rs6926282	6	112968481	LOC643859 / PA2G4P5	G	A	0.952264	0.092799	0.019997	3.47e-06	genotyped	1	G	A	0.86761	-0.0058223	0.01163	0.61663	genotyped	1	G	A	0.908223	-0.0038269	0.011327	0.73547	genotyped	1	N/A	N/A	N/A	N/A	N/A	N/A	genotyped	NA	N/A	N/A	N/A	N/A	N/A	N/A	a	g	-1.823	0.06828	++-?	a
1	FCP	rs9402117	6	129675227	LAMA2	T	C	0.97077	-0.02013	0.024788	0.41673	imputed	0.981	N/A	N/A	N/A	N/A	N/A	N/A	N/A	N/A	T	C	0.969859	-0.00078823	0.018908	0.96675	imputed	0.985	T	C	0.945022	-0.068036	0.015389	9.83e-06	imputed	0.994	N/A	N/A	N/A	N/A	N/A	N/A	t	c	-3.046	0.002319	?---	t
1	FCP	rs2306942	6	129677493	LAMA2	G	A	0.949816	-0.012322	0.018806	0.51234	genotyped	1	G	A	0.81596	0.02077	0.010261	0.042952	genotyped	1	G	A	0.961087	0.0041303	0.016735	0.80506	genotyped	1	G	A	0.943548	-0.067666	0.015182	8.32e-06	genotyped	1	N/A	N/A	N/A	N/A	N/A	N/A	a	g	1.452	0.1466	--++	a
1	FCP	rs3813367	6	129716450	LAMA2	T	G	0.048348	0.011789	0.019097	0.53701	genotyped	1	T	G	0.13239	-0.014299	0.01163	0.21888	genotyped	1	T	G	0.038995	-0.0024045	0.016874	0.88668	imputed	0.982	T	G	0.056027	0.069115	0.01523	5.68e-06	genotyped	1	N/A	N/A	N/A	N/A	N/A	N/A	t	g	1.925	0.05421	--++	t
1	FCP	rs17057200	6	129742691	LAMA2	T	C	0.044064	0.011191	0.019842	0.57275	genotyped	1	T	C	0.091177	-0.0079414	0.013709	0.5624	genotyped	0.996	T	C	0.03726	-0.0030859	0.017586	0.86071	imputed	0.937	T	C	0.048387	0.077977	0.016345	1.84e-06	genotyped	1	N/A	N/A	N/A	N/A	N/A	N/A	t	c	2.323	0.02018	--++	t
1	FCP	rs9388701	6	129742792	LAMA2	T	A	0.88383	-0.011945	0.012755	0.34901	imputed	0.995	T	A	0.75197	0.0064846	0.0091449	0.47827	imputed	0.999	T	A	0.84351	-0.0038063	0.0092692	0.68133	imputed	0.972	T	A	0.937771	-0.066365	0.014793	7.25e-06	imputed	0.966	N/A	N/A	N/A	N/A	N/A	N/A	a	t	2.598	0.009377	-+++	a
1	FCP	rs6899448	6	129744486	LAMA2	T	C	0.88678	-0.014818	0.01284	0.24849	genotyped	1	T	C	0.80939	0.013019	0.010205	0.20203	genotyped	1	T	C	0.84661	-0.0041157	0.0092239	0.65545	imputed	0.997	T	C	0.939728	-0.066577	0.014777	6.62e-06	genotyped	1	N/A	N/A	N/A	N/A	N/A	N/A	t	c	-2.443	0.01457	+---	t
1	FCP	rs2437089	6	129746282	LAMA2	T	C	0.88617	-0.016958	0.01282	0.18591	genotyped	1	T	C	0.80704	0.011992	0.010124	0.23621	genotyped	1	T	C	0.84692	-0.0041444	0.0092185	0.65302	genotyped	1	T	C	0.937269	-0.066257	0.014799	7.56e-06	imputed	0.957	N/A	N/A	N/A	N/A	N/A	N/A	t	c	-2.548	0.01085	+---	t
1	FCP	rs13196492	6	147083977	C6orf103	G	A	0.82007	-0.02235	0.010793	0.038378	genotyped	1	G	A	0.87277	-0.030187	0.012007	0.011932	genotyped	1	G	A	0.67181	-0.024082	0.0068848	0.00046892	genotyped	1	N/A	N/A	N/A	N/A	N/A	N/A	N/A	N/A	N/A	N/A	N/A	N/A	N/A	N/A	a	g	4.746	2.07e-06	+++?	a
1	FCP	rs9390491	6	148034747	SAMD5 / SASH1	G	A	0.61275	-0.01967	0.0089202	0.027446	imputed	0.951	N/A	N/A	N/A	N/A	N/A	N/A	N/A	N/A	G	A	0.5053	-0.031716	0.006813	3.24e-06	imputed	0.937	G	A	0.396	0.0024593	0.0069715	0.72427	genotyped	1	N/A	N/A	N/A	N/A	N/A	N/A	a	g	3.844	0.000121	?++-	a
1	FCP	rs11155523	6	148039763	SAMD5 / SASH1	G	A	0.39099	0.019042	0.0087501	0.02954	genotyped	0.998	G	A	0.922066	0.0023849	0.014364	0.86814	genotyped	1	G	A	0.50258	0.030617	0.0066183	3.73e-06	genotyped	1	G	A	0.61562	-0.002614	0.0072335	0.71782	imputed	0.939	A	G	0.4986	-0.005938	0.005365	0.2685	a	g	-3.398	0.0006793	---+	a
1	FCP	rs711441	7	106444081	PIK3CG / PRKAR2B	T	C	0.54651	0.013968	0.0082259	0.089488	genotyped	1	T	C	0.62817	-0.010313	0.0083048	0.21433	genotyped	1	T	C	0.45521	0.03041	0.0066362	4.6e-06	genotyped	1	T	C	0.53862	0.0028545	0.0069837	0.68273	genotyped	1	T	C	0.4611	0.009687	0.005348	0.07023	t	c	2.875	0.004045	-+++	t
1	FCP	rs849308	7	106448364	PIK3CG / PRKAR2B	C	A	0.45661	-0.0054172	0.0084105	0.51951	imputed	1	C	A	0.25045	-0.0098493	0.0094313	0.29634	imputed	0.999	C	A	0.54342	-0.032668	0.0068483	1.84e-06	imputed	0.922	C	A	0.45839	-0.0071838	0.0070573	0.30872	imputed	1	N/A	N/A	N/A	N/A	N/A	N/A	a	c	3.962	7.43e-05	++++	a
1	FCP	rs849309	7	106448386	PIK3CG / PRKAR2B	T	C	0.39168	-0.0093765	0.0085865	0.27483	genotyped	1	T	C	0.16479	0.0045549	0.010828	0.674	genotyped	1	T	C	0.45967	-0.030675	0.0067783	6.03e-06	imputed	0.926	T	C	0.35653	-0.009133	0.0072545	0.20805	genotyped	1	N/A	N/A	N/A	N/A	N/A	N/A	t	c	-3.424	0.0006164	+---	t
1	FCP	rs849310	7	106448412	PIK3CG / PRKAR2B	C	A	0.45655	-0.0054119	0.0084105	0.51992	genotyped	1	C	A	0.25023	-0.0098679	0.0094291	0.29531	genotyped	1	C	A	0.54342	-0.03267	0.0068498	1.85e-06	imputed	0.922	C	A	0.4584	-0.0071832	0.0070571	0.30874	genotyped	1	N/A	N/A	N/A	N/A	N/A	N/A	a	c	3.962	7.42e-05	++++	a
1	FCP	rs849298	7	106452083	PIK3CG / PRKAR2B	T	A	0.45201	-0.0077995	0.0084792	0.35766	imputed	0.983	T	A	0.17599	0.0024541	0.010711	0.81878	imputed	0.979	T	A	0.53424	-0.033088	0.0068018	1.15e-06	imputed	0.938	T	A	0.44735	-0.0079055	0.0071627	0.26972	imputed	0.958	N/A	N/A	N/A	N/A	N/A	N/A	a	t	3.552	0.0003818	-+++	a
1	FCP	rs9987289	8	9220768	PPP1R3B / LOC100129150	G	A	0.78275	-0.042527	0.010035	2.25e-05	imputed	0.993	G	A	0.8104	-0.019811	0.010352	0.055664	imputed	0.972	G	A	0.924438	-0.016456	0.012269	0.17981	imputed	0.993	G	A	0.971349	-0.057173	0.020721	0.0057937	imputed	0.957	N/A	N/A	N/A	N/A	N/A	N/A	a	g	4.929	8.25e-07	++++	a
1	FCP	rs4841132	8	9221006	PPP1R3B / LOC100129150	G	A	0.7883	-0.044135	0.010096	1.23e-05	imputed	0.997	G	A	0.87118	-0.030006	0.011937	0.011949	imputed	0.997	G	A	0.92792	-0.011201	0.01259	0.37364	imputed	0.981	G	A	0.971603	-0.057594	0.020836	0.0057077	imputed	0.965	A	G	0.0896	0.02785	0.00918	0.002447	a	g	5.033	4.83e-07	++++	a
1	FCP	rs4841133	8	9221074	PPP1R3B / LOC100129150	G	A	0.78268	-0.04249	0.010035	2.29e-05	imputed	0.993	G	A	0.81012	-0.019747	0.010357	0.056573	imputed	0.97	G	A	0.924654	-0.01637	0.012263	0.1819	imputed	0.996	G	A	0.971458	-0.057289	0.020679	0.005599	imputed	0.964	N/A	N/A	N/A	N/A	N/A	N/A	a	g	4.926	8.37e-07	++++	a
1	FCP	rs4240624	8	9221641	PPP1R3B / LOC100129150	G	A	0.21709	0.042452	0.010028	2.3e-05	imputed	0.995	G	A	0.18957	0.019862	0.01035	0.054988	imputed	0.972	G	A	0.07524	0.016285	0.012263	0.18417	imputed	0.998	G	A	0.028608	0.05705	0.020671	0.0057827	imputed	0.962	N/A	N/A	N/A	N/A	N/A	N/A	a	g	-4.923	8.53e-07	----	a
1	FCP	rs10106829	8	9222038	PPP1R3B / LOC100129150	G	A	0.66463	-0.030939	0.0086802	0.00036482	genotyped	1	G	A	0.75542	-0.012733	0.0091907	0.16593	genotyped	1	G	A	0.8025	-0.012523	0.007998	0.11739	genotyped	1	G	A	0.966469	-0.051948	0.018936	0.0060814	genotyped	1	N/A	N/A	N/A	N/A	N/A	N/A	a	g	4.497	6.9e-06	++++	a
1	FCP	rs6601299	8	9222101	PPP1R3B / LOC100129150	T	C	0.26805	0.041025	0.009344	1.13e-05	imputed	1	T	C	0.13052	0.02906	0.01182	0.013951	imputed	1	T	C	0.081662	0.0081413	0.01196	0.49606	imputed	0.989	T	C	0.029998	0.058395	0.020196	0.0038358	imputed	0.99	N/A	N/A	N/A	N/A	N/A	N/A	t	c	4.964	6.91e-07	++++	t
1	FCP	rs2126260	8	9222491	PPP1R3B / LOC100129150	T	C	0.34029	0.032014	0.0086592	0.00021805	imputed	0.994	T	C	0.26257	0.009492	0.0089705	0.28999	imputed	0.994	T	C	0.19798	0.012476	0.0079979	0.11879	imputed	0.999	T	C	0.037211	0.056399	0.018607	0.0024373	imputed	0.929	N/A	N/A	N/A	N/A	N/A	N/A	t	c	4.539	5.66e-06	++++	t
1	FCP	rs2126259	8	9222556	PPP1R3B / LOC100129150	T	C	0.27295	0.039951	0.0093237	1.83e-05	genotyped	1	T	C	0.18169	0.018157	0.010315	0.078377	genotyped	1	T	C	0.085536	0.012106	0.011673	0.29968	genotyped	1	T	C	0.029912	0.057665	0.020059	0.0040423	imputed	0.993	N/A	N/A	N/A	N/A	N/A	N/A	t	c	4.765	1.89e-06	++++	t
1	FCP	rs1461729	8	9224652	PPP1R3B / LOC100129150	G	A	0.72766	-0.041962	0.0093224	6.76e-06	genotyped	1	G	A	0.86901	-0.028882	0.011808	0.014448	genotyped	1	G	A	0.918382	-0.0082097	0.011959	0.4924	imputed	0.99	G	A	0.970289	-0.0585	0.020229	0.003829	genotyped	1	N/A	N/A	N/A	N/A	N/A	N/A	a	g	5.009	5.48e-07	++++	a
1	FCP	rs7004769	8	9225005	PPP1R3B / LOC100129150	G	A	0.65851	-0.032072	0.0086748	0.00021807	genotyped	1	G	A	0.74648	-0.0081193	0.0090086	0.36744	genotyped	1	G	A	0.80213	-0.011138	0.0079961	0.16363	genotyped	1	G	A	0.962015	-0.057071	0.018512	0.0020498	imputed	0.917	A	G	0.2057	0.01826	0.0065	0.005021	a	g	4.396	1.1e-05	++++	a
1	FCP	rs13265179	8	9232104	PPP1R3B / LOC100129150	C	A	0.73779	-0.042071	0.0094637	8.77e-06	imputed	0.979	C	A	0.985881	-0.012	0.033206	0.71782	imputed	0.958	C	A	0.905952	-0.0057958	0.01129	0.60772	imputed	0.988	C	A	0.978806	-0.075407	0.023977	0.0016607	imputed	0.962	N/A	N/A	N/A	N/A	N/A	N/A	a	c	3.996	6.43e-05	++++	a
1	FCP	rs2169385	8	9244088	PPP1R3B / LOC100129150	G	A	0.32007	0.03193	0.0089499	0.00036021	genotyped	1	G	A	0.43568	0.0176	0.0079795	0.027405	genotyped	1	G	A	0.12592	0.0056511	0.0097362	0.56163	genotyped	1	G	A	0.039049	0.054877	0.017938	0.0022193	genotyped	1	N/A	N/A	N/A	N/A	N/A	N/A	a	g	-4.517	6.27e-06	----	a
1	FCP	rs4909851	8	136035123	ZFAT / LOC286094	G	A	0.55875	0.037731	0.0083698	6.54e-06	genotyped	1	G	A	0.69765	0.012603	0.0086743	0.14624	genotyped	1	G	A	0.50954	-0.0065064	0.0064381	0.31221	genotyped	1	G	A	0.36503	-0.010927	0.0071556	0.12674	genotyped	1	N/A	N/A	N/A	N/A	N/A	N/A	a	g	-1.302	0.193	-+-+	a
1	FCP	rs7817161	8	136038995	ZFAT / LOC286094	T	C	0.4488	-0.038735	0.0086295	7.17e-06	imputed	0.946	T	C	0.31579	-0.011656	0.0088959	0.1901	imputed	0.914	T	C	0.49052	0.0065183	0.006575	0.3215	imputed	0.95	T	C	0.61893	0.010895	0.0072183	0.13119	imputed	0.971	N/A	N/A	N/A	N/A	N/A	N/A	t	c	-1.243	0.2138	-+-+	t
1	FCP	rs2113459	9	74806743	ALDH1A1 / LOC100133307	G	A	0.083676	-0.021871	0.015205	0.15031	imputed	0.971	G	A	0.21752	0.045141	0.01009	7.69e-06	imputed	0.904	G	A	0.10232	-0.0022205	0.010765	0.83658	imputed	0.991	G	A	0.096588	0.00307	0.011897	0.79638	imputed	0.982	N/A	N/A	N/A	N/A	N/A	N/A	a	g	-1.596	0.1105	-++-	a
1	FCP	rs10115062	9	87313658	NTRK2 / AGTPBP1	T	C	0.53454	0.0050137	0.0081781	0.53983	imputed	0.999	T	C	0.72915	-0.010824	0.0087964	0.21849	imputed	0.976	T	C	0.50762	0.029595	0.0065794	6.85e-06	imputed	0.993	T	C	0.71265	0.0086455	0.0077654	0.26557	genotyped	1	N/A	N/A	N/A	N/A	N/A	N/A	t	c	2.731	0.006321	-+++	t
1	FCP	rs1345988	9	87315117	NTRK2 / AGTPBP1	G	C	0.53448	0.0050044	0.0081767	0.54052	imputed	0.999	G	C	0.7295	-0.010899	0.0088089	0.21597	imputed	0.974	G	C	0.50723	0.029667	0.0065759	6.44e-06	imputed	0.992	G	C	0.7126	0.0086773	0.0077769	0.26451	imputed	0.996	N/A	N/A	N/A	N/A	N/A	N/A	c	g	-2.736	0.006228	+---	c
1	FCP	rs7034690	9	87318156	NTRK2 / AGTPBP1	T	C	0.43003	-0.0027656	0.0082842	0.73849	imputed	0.975	N/A	N/A	N/A	N/A	N/A	N/A	N/A	N/A	T	C	0.4491	-0.030186	0.0066213	5.14e-06	imputed	0.964	T	C	0.27745	-0.011002	0.0079477	0.16626	imputed	0.961	N/A	N/A	N/A	N/A	N/A	N/A	t	c	-3.889	0.0001008	?---	t
1	FCP	rs6559871	9	87326209	NTRK2 / AGTPBP1	T	A	0.42418	-0.0040958	0.0082152	0.61808	imputed	0.996	T	A	0.1047	0.03086	0.012682	0.014958	imputed	0.998	T	A	0.44905	-0.029454	0.0065369	6.61e-06	imputed	0.996	T	A	0.27254	-0.011155	0.0079039	0.15817	imputed	0.987	N/A	N/A	N/A	N/A	N/A	N/A	a	t	2.249	0.0245	-+++	a
1	FCP	rs1250792	9	87327459	NTRK2 / AGTPBP1	G	A	0.64015	0.0034775	0.0084532	0.68079	genotyped	1	G	A	0.965728	-0.013442	0.021861	0.53864	genotyped	1	G	A	0.68502	0.031288	0.0068377	4.74e-06	genotyped	1	G	A	0.80942	0.012133	0.0087431	0.16523	genotyped	1	N/A	N/A	N/A	N/A	N/A	N/A	a	g	-3.131	0.001743	+---	a
1	FCP	rs1030303	9	87355486	AGTPBP1	T	A	0.57025	0.0021542	0.0082096	0.79302	imputed	0.999	T	A	0.88591	-0.023028	0.012302	0.061224	imputed	0.996	T	A	0.54884	0.028971	0.0065377	9.36e-06	imputed	0.997	T	A	0.73349	0.014531	0.0080135	0.069785	imputed	1	N/A	N/A	N/A	N/A	N/A	N/A	a	t	-2.589	0.009614	+---	a
1	FCP	rs10120410	9	87361640	AGTPBP1	T	C	0.42978	-0.0020566	0.0082277	0.80261	imputed	0.997	T	C	0.11642	0.02662	0.012226	0.029457	imputed	0.996	T	C	0.45121	-0.028981	0.0065382	9.31e-06	imputed	0.997	T	C	0.26655	-0.014658	0.008012	0.067318	genotyped	1	N/A	N/A	N/A	N/A	N/A	N/A	t	c	-2.443	0.01456	+---	t
1	FCP	rs10115559	9	87381004	AGTPBP1	T	G	0.36169	-0.0024262	0.0085108	0.77559	genotyped	1	T	G	0.049766	-0.0061554	0.018159	0.73463	genotyped	1	T	G	0.4486	-0.028948	0.0065334	9.39e-06	genotyped	1	T	G	0.23302	-0.012242	0.0083782	0.14397	genotyped	1	N/A	N/A	N/A	N/A	N/A	N/A	t	g	-3.502	0.0004616	----	t
1	FCP	rs1571119	9	87405354	AGTPBP1	T	C	0.63035	-0.00027711	0.0084676	0.97389	genotyped	1	T	C	0.88263	-0.0081713	0.012239	0.50437	genotyped	1	T	C	0.54101	0.029273	0.0065985	9.16e-06	imputed	0.962	T	C	0.76174	0.012429	0.008433	0.14052	imputed	0.965	N/A	N/A	N/A	N/A	N/A	N/A	t	c	2.881	0.003964	-+-+	t
1	FCP	rs954803	9	87419929	AGTPBP1	G	A	0.63586	0.001282	0.008487	0.87993	genotyped	1	G	A	0.915023	-0.01397	0.014101	0.32182	genotyped	1	G	A	0.55286	0.028971	0.0065179	8.8e-06	genotyped	1	G	A	0.76551	0.011409	0.0083929	0.17402	imputed	0.99	N/A	N/A	N/A	N/A	N/A	N/A	a	g	-2.747	0.006012	+---	a
1	FCP	rs3908484	9	87421342	AGTPBP1	G	A	0.35878	-0.00010983	0.0086572	0.98988	imputed	0.964	G	A	0.11598	0.0075978	0.012524	0.54407	genotyped	0.964	G	A	0.43847	-0.029508	0.0066617	9.45e-06	imputed	0.958	G	A	0.22838	-0.011469	0.0086064	0.18266	imputed	0.962	N/A	N/A	N/A	N/A	N/A	N/A	a	g	2.854	0.00432	-+++	a
1	FCP	rs618242	9	87424774	AGTPBP1	G	A	0.36903	-0.00020871	0.0084625	0.98032	genotyped	1	G	A	0.11831	0.0085595	0.012265	0.48526	genotyped	1	G	A	0.44732	-0.029443	0.0066619	9.89e-06	imputed	0.953	G	A	0.23514	-0.012024	0.0083544	0.15009	genotyped	1	N/A	N/A	N/A	N/A	N/A	N/A	a	g	2.864	0.004186	-+++	a
1	FCP	rs4746998	10	71740601	LRRC20	T	C	0.64871	-0.0427	0.0088435	1.38e-06	genotyped	1	T	C	0.55869	-0.0018158	0.0078829	0.81782	genotyped	1	T	C	0.60132	-0.009947	0.0066006	0.13182	genotyped	1	T	C	0.68557	0.020014	0.0075825	0.0083025	imputed	0.938	N/A	N/A	N/A	N/A	N/A	N/A	t	c	-1.662	0.09642	---+	t
1	FCP	rs3812700	10	71742900	LRRC20	T	C	0.3517	0.040945	0.0089128	4.35e-06	imputed	0.986	T	C	0.45061	-0.001184	0.0079435	0.88151	imputed	0.972	T	C	0.401	0.010099	0.0066435	0.12848	imputed	0.986	T	C	0.31913	-0.021003	0.0074628	0.0048882	imputed	0.967	N/A	N/A	N/A	N/A	N/A	N/A	t	c	1.293	0.1962	-++-	t
1	FCP	rs7086666	10	71744699	LRRC20	T	G	0.34807	0.041423	0.0089198	3.42e-06	imputed	0.995	T	G	0.45731	-0.0010561	0.0079266	0.89401	imputed	0.964	T	G	0.3981	0.010016	0.0066118	0.12981	imputed	0.998	T	G	0.32003	-0.020096	0.0073198	0.0060425	genotyped	1	N/A	N/A	N/A	N/A	N/A	N/A	t	g	1.354	0.1756	-++-	t
1	FCP	rs7930479	11	21906669	NELL1 / ANO5	G	A	0.51535	-0.02976	0.0083261	0.00035116	imputed	0.982	G	A	0.47042	-0.021929	0.0080909	0.0067226	imputed	0.952	G	A	0.47058	-0.01285	0.0066085	0.051835	imputed	0.985	G	A	0.63639	-0.0070523	0.0073578	0.33782	imputed	0.947	N/A	N/A	N/A	N/A	N/A	N/A	a	g	4.44	8.98e-06	++++	a
1	FCP	rs10833664	11	21909132	NELL1 / ANO5	G	A	0.52663	-0.029449	0.008267	0.00036775	imputed	0.997	G	A	0.50977	-0.021252	0.0079507	0.0075191	imputed	0.987	G	A	0.48522	-0.013764	0.0065589	0.035858	imputed	1	G	A	0.65855	-0.0061326	0.0072458	0.39735	imputed	0.995	N/A	N/A	N/A	N/A	N/A	N/A	a	g	4.444	8.81e-06	++++	a
1	FCP	rs7117485	11	21909297	NELL1 / ANO5	G	C	0.51086	-0.029427	0.0083029	0.00039394	imputed	0.993	G	C	0.4896	-0.020992	0.0079806	0.0085285	imputed	0.99	G	C	0.46765	-0.012927	0.0065609	0.048802	imputed	1	G	C	0.62999	-0.0074182	0.0072212	0.30429	imputed	0.997	N/A	N/A	N/A	N/A	N/A	N/A	c	g	4.438	9.08e-06	++++	c
1	FCP	rs7121300	11	21909859	NELL1 / ANO5	G	A	0.48967	0.029352	0.0082926	0.00040084	imputed	0.998	G	A	0.51063	0.020993	0.0079745	0.0084764	imputed	0.992	G	A	0.53235	0.012927	0.0065609	0.048803	imputed	1	G	A	0.3703	0.0074275	0.0072244	0.3039	imputed	0.996	N/A	N/A	N/A	N/A	N/A	N/A	a	g	-4.437	9.1e-06	----	a
1	FCP	rs6483813	11	21910098	NELL1 / ANO5	C	A	0.48964	0.029352	0.008296	0.00040303	imputed	0.997	C	A	0.51064	0.020994	0.0079749	0.0084754	imputed	0.992	C	A	0.53235	0.012927	0.0065609	0.048803	imputed	1	C	A	0.3701	0.0074242	0.0072223	0.30397	imputed	0.996	N/A	N/A	N/A	N/A	N/A	N/A	a	c	-4.437	9.13e-06	----	a
1	FCP	rs6483814	11	21910133	NELL1 / ANO5	T	G	0.48978	0.029345	0.0082936	0.00040268	imputed	0.998	T	G	0.51073	0.020986	0.0079729	0.0084845	imputed	0.992	T	G	0.53235	0.012927	0.0065609	0.048803	imputed	1	T	G	0.36997	0.007433	0.0072205	0.30328	imputed	0.997	N/A	N/A	N/A	N/A	N/A	N/A	t	g	4.437	9.1e-06	++++	t
1	FCP	rs10833684	11	21945510	NELL1 / ANO5	G	A	0.65973	0.030733	0.008932	0.00058012	genotyped	1	G	A	0.64507	0.024944	0.0083889	0.002945	genotyped	1	G	A	0.53965	0.01091	0.0065638	0.096474	genotyped	1	N/A	N/A	N/A	N/A	N/A	N/A	N/A	N/A	N/A	N/A	N/A	N/A	N/A	N/A	a	g	-4.507	6.56e-06	---?	a
1	FCP	rs4944839	11	72792390	RELT / FAM168A	C	T	0.984597	0.021682	0.032825	0.50891	imputed	0.991	N/A	N/A	N/A	N/A	N/A	N/A	N/A	N/A	C	T	0.976444	-0.097025	0.021615	7.16e-06	imputed	0.997	N/A	N/A	N/A	N/A	N/A	N/A	N/A	N/A	N/A	N/A	N/A	N/A	N/A	N/A	t	c	3.144	0.001664	?+-?	t
1	FCP	rs4944841	11	72861246	KIAA0280	T	C	0.9847	0.021507	0.032793	0.51193	genotyped	1	N/A	N/A	N/A	N/A	N/A	N/A	genotyped	NA	T	C	0.976454	-0.096988	0.02161	7.18e-06	genotyped	0.998	N/A	N/A	N/A	N/A	N/A	N/A	N/A	N/A	N/A	N/A	N/A	N/A	N/A	N/A	t	c	-3.147	0.00165	?-+?	t
1	FCP	rs2010435	11	82528144	LOC100127960 / PCF11	T	C	0.30049	0.0097846	0.0089791	0.27584	genotyped	1	T	C	0.47324	-0.0040779	0.00793	0.60709	genotyped	1	T	C	0.26982	-0.00065983	0.007289	0.92787	genotyped	1	T	C	0.39898	0.032346	0.007069	4.75e-06	genotyped	1	N/A	N/A	N/A	N/A	N/A	N/A	t	c	2.527	0.01149	--++	t
1	FCP	rs2698746	12	86586145	LOC100132846 / CYCSP30	G	A	0.81518	-0.018079	0.010409	0.082415	genotyped	1	G	A	0.80582	-0.020121	0.0093453	0.031315	genotyped	0.996	G	A	0.75334	-0.017422	0.007473	0.019737	genotyped	1	G	A	0.87818	-0.027389	0.010627	0.0099552	genotyped	1	N/A	N/A	N/A	N/A	N/A	N/A	a	g	4.427	9.54e-06	++++	a
1	FCP	rs3213900	12	97449996	TMPO	C	A	0.88678	0.034375	0.012916	0.0077814	genotyped	1	C	A	0.68967	0.011422	0.0086148	0.18489	genotyped	1	C	A	0.84838	0.021476	0.0091047	0.018335	genotyped	1	C	A	0.68251	0.019697	0.0073222	0.0071443	genotyped	1	N/A	N/A	N/A	N/A	N/A	N/A	a	c	-4.492	7.05e-06	----	a
1	FCP	rs9512379	13	26264674	GPR12 / LOC100129306	T	C	0.3782	0.005039	0.0085878	0.55737	genotyped	1	T	C	0.35915	0.038267	0.0082499	3.51e-06	genotyped	1	N/A	N/A	N/A	N/A	N/A	N/A	N/A	N/A	N/A	N/A	N/A	N/A	N/A	N/A	N/A	N/A	N/A	N/A	N/A	N/A	N/A	N/A	t	c	3.876	0.0001062	+?+?	N/A
1	FCP	rs4421848	13	26267683	GPR12 / LOC100129306	T	C	0.68115	-0.0014052	0.0089429	0.87514	genotyped	1	T	C	0.70939	-0.039544	0.008668	5.07e-06	genotyped	1	T	C	0.57673	0.00050521	0.0065172	0.93821	genotyped	1	T	C	0.52886	-0.0067869	0.0069831	0.33109	genotyped	1	N/A	N/A	N/A	N/A	N/A	N/A	t	c	-2.765	0.005692	-+--	t
1	FCP	rs9537117	13	54916078	LOC100128485 / LOC100130462	G	A	0.17109	-0.0025508	0.010818	0.8136	imputed	0.99	G	A	0.36812	-0.0046544	0.008138	0.56737	imputed	0.998	G	A	0.27813	-0.032458	0.0071914	6.38e-06	imputed	0.991	G	A	0.34642	-0.004659	0.0072798	0.52219	imputed	0.994	G	A	0.2644	-0.003095	0.006064	0.6099	a	g	3.217	0.001294	++++	a
1	FCP	rs11841159	13	54934315	LOC100128485 / LOC100130462	C	A	0.17043	-0.0016864	0.010859	0.87658	imputed	0.994	C	A	0.36782	-0.0044943	0.0081511	0.58138	imputed	0.995	C	A	0.27785	-0.032229	0.0071959	7.51e-06	imputed	0.995	C	A	0.34057	-0.0047208	0.0073801	0.52239	imputed	0.975	N/A	N/A	N/A	N/A	N/A	N/A	a	c	3.153	0.001615	++++	a
1	FCP	rs4885889	13	54982577	LOC100128485 / LOC100130462	G	A	0.80783	0.0052359	0.010351	0.61296	genotyped	1	G	A	0.35915	0.00047629	0.0082	0.95368	genotyped	1	G	A	0.71643	0.031893	0.0071466	8.1e-06	imputed	0.999	G	A	0.65293	0.0042294	0.0072505	0.55968	imputed	0.999	N/A	N/A	N/A	N/A	N/A	N/A	a	g	-3.024	0.002497	----	a
1	FCP	rs628700	13	55040423	LOC100128485 / LOC100130462	T	G	0.80964	0.0050507	0.01038	0.62657	imputed	0.995	T	G	0.38203	-0.0029624	0.0081378	0.71584	imputed	0.994	T	G	0.7231	0.032016	0.007226	9.39e-06	imputed	0.998	T	G	0.65376	0.0031613	0.0072559	0.66306	imputed	0.996	N/A	N/A	N/A	N/A	N/A	N/A	t	g	2.714	0.006641	-+++	t
1	FCP	rs2299927	14	77136414	SPTLC2	G	A	0.7958	0.021556	0.010323	0.036794	imputed	0.981	G	A	0.83665	0.0058847	0.011063	0.59479	imputed	0.915	G	A	0.73735	2.86e-05	0.0074812	0.99695	imputed	0.947	G	A	0.72284	0.034703	0.0078059	8.76e-06	genotyped	1	N/A	N/A	N/A	N/A	N/A	N/A	a	g	-3.455	0.0005497	----	a
1	FCP	rs2647355	15	22712524	SNRPN	N/A	N/A	N/A	N/A	N/A	N/A	N/A	N/A	N/A	N/A	N/A	N/A	N/A	N/A	N/A	N/A	N/A	N/A	N/A	N/A	N/A	N/A	N/A	N/A	G	A	0.26716	-0.037002	0.0079257	3.03e-06	genotyped	0.999	N/A	N/A	N/A	N/A	N/A	N/A	a	g	4.669	3.03e-06	???+	N/A
1	FCP	rs2647354	15	22713051	SNRPN	N/A	N/A	N/A	N/A	N/A	N/A	N/A	N/A	G	A	0.26792	-0.0039974	0.0091972	0.66383	imputed	0.918	G	A	0.27895	0.0011562	0.0072517	0.87332	imputed	0.973	G	A	0.22803	-0.038995	0.0084561	4e-06	imputed	0.979	N/A	N/A	N/A	N/A	N/A	N/A	a	g	2.774	0.005532	+-?+	a
1	FCP	rs12599653	16	64415118	LOC283867 / CDH5	G	A	0.88372	0.056468	0.012596	7.36e-06	genotyped	1	G	A	0.938501	-0.0017689	0.016367	0.91394	genotyped	1	G	A	0.82232	0.0097643	0.0081788	0.23253	genotyped	1	G	A	0.935483	0.010619	0.014168	0.45352	genotyped	1	N/A	N/A	N/A	N/A	N/A	N/A	a	g	-2.923	0.003463	+---	a
1	FCP	rs8086644	18	58939539	PHLPP / BCL2	G	A	0.87023	-0.0042579	0.01235	0.73027	genotyped	1	G	A	0.62676	-0.035926	0.0080241	7.56e-06	genotyped	1	N/A	N/A	N/A	N/A	N/A	N/A	genotyped	NA	N/A	N/A	N/A	N/A	N/A	N/A	N/A	N/A	N/A	N/A	N/A	N/A	N/A	N/A	a	g	3.595	0.0003241	+?+?	N/A
1	FCP	rs4987853	18	58944635	BCL2	T	C	0.85496	-0.0010447	0.011753	0.92917	genotyped	1	T	C	0.61878	-0.03855	0.0079081	1.09e-06	genotyped	1	T	C	0.78553	0.00366	0.0078079	0.63924	genotyped	1	N/A	N/A	N/A	N/A	N/A	N/A	genotyped	NA	N/A	N/A	N/A	N/A	N/A	N/A	t	c	-2.534	0.01128	-+-?	t
1	FCP	rs746064	21	41503318	BACE2	G	A	0.72766	0.021304	0.0090478	0.018542	genotyped	1	G	A	0.51408	0.013897	0.0078623	0.077136	genotyped	1	G	A	0.60794	0.012308	0.0064243	0.05538	genotyped	1	G	A	0.909168	0.036525	0.012228	0.0028178	genotyped	1	N/A	N/A	N/A	N/A	N/A	N/A	a	g	-4.484	7.31e-06	----	a
1	FCP	rs737288	21	41503507	BACE2	T	G	0.23606	-0.02314	0.0096157	0.016109	imputed	0.998	T	G	0.60326	-0.012558	0.0082845	0.12955	imputed	0.976	T	G	0.31294	-0.014705	0.0068536	0.031904	imputed	0.996	T	G	0.073948	-0.034236	0.013384	0.010527	imputed	0.992	T	G	0.3005	-0.0234	0.005866	6.84e-05	t	g	-4.289	1.79e-05	----	t
1	FCP	rs6517656	21	41505608	BACE2	G	A	0.83905	0.029094	0.011264	0.0097986	genotyped	1	G	A	0.20892	0.017435	0.0097338	0.073273	genotyped	1	G	A	0.83407	0.018898	0.008776	0.031294	genotyped	1	G	A	0.94567	0.032224	0.015557	0.038321	genotyped	1	A	G	0.1608	-0.03979	0.007394	8.21e-08	a	g	-4.253	2.11e-05	----	a
1	FCP	rs13052926	21	41506958	BACE2	G	A	0.13036	-0.033306	0.012267	0.0066269	genotyped	1	G	A	0.29672	-0.012211	0.0087498	0.16286	genotyped	1	G	A	0.15835	-0.02119	0.009065	0.019411	imputed	0.965	G	A	0.050085	-0.039928	0.016254	0.014026	genotyped	1	N/A	N/A	N/A	N/A	N/A	N/A	a	g	4.417	1e-05	++++	a
1	FPG	rs11155140	0	NA	NA / NA	G	A	0.957005	0.0048392	0.0048302	0.31641	imputed	0.98	N/A	N/A	N/A	N/A	N/A	N/A	N/A	N/A	G	A	0.914783	-0.011146	0.0023883	3.06e-06	imputed	0.973	G	A	0.905469	0.0023163	0.0023727	0.32896	imputed	0.993	N/A	N/A	N/A	N/A	N/A	N/A	a	g	1.904	0.05689	?+--	a
1	FPG	rs11203247	1	18157845	ACTL8 / IGSF21	G	A	0.24357	0.0039315	0.0022544	0.081165	genotyped	1	G	A	0.15953	-0.0023054	0.0015555	0.1383	genotyped	1	G	A	0.1902	0.00073994	0.0016589	0.65557	genotyped	1	G	A	0.13031	0.0095702	0.0020647	3.57e-06	genotyped	1	N/A	N/A	N/A	N/A	N/A	N/A	a	g	-2.655	0.007938	+---	a
1	FPG	rs6537816	1	114552428	SYT6 / MRP63P1	G	A	0.78274	-0.0012868	0.0022999	0.57582	genotyped	1	G	A	0.55628	0.0053659	0.0011075	1.27e-06	genotyped	1	G	A	0.79751	-0.0024505	0.0016934	0.14786	imputed	0.907	G	A	0.7292	-0.0017293	0.0015346	0.2598	genotyped	1	N/A	N/A	N/A	N/A	N/A	N/A	a	g	-0.761	0.4467	-+++	a
1	FPG	rs6537817	1	114553691	SYT6 / MRP63P1	G	C	0.77922	-0.0012523	0.0022982	0.58582	genotyped	0.984	G	C	0.45578	-0.0051717	0.0011074	3.01e-06	genotyped	0.999	G	C	0.20318	0.0024562	0.0016902	0.14617	imputed	0.911	G	C	0.30739	0.0023798	0.0014776	0.10726	imputed	0.981	N/A	N/A	N/A	N/A	N/A	N/A	c	g	0.896	0.3703	+-+-	c
1	FPG	rs16835894	1	236063217	RYR2	N/A	N/A	N/A	N/A	N/A	N/A	genotyped	NA	T	C	0.042791	0.01263	0.0028124	7.1e-06	genotyped	1	N/A	N/A	N/A	N/A	N/A	N/A	N/A	N/A	T	C	0.050085	-0.00061508	0.0031493	0.84515	genotyped	1	N/A	N/A	N/A	N/A	N/A	N/A	t	c	2.961	0.003068	+??-	N/A
1	FPG	rs1346608	2	5844370	SOX11 / FLJ30594	T	G	0.20563	-0.0014178	0.0023914	0.55328	genotyped	1	T	G	0.10279	-0.0083202	0.0018664	8.27e-06	genotyped	1	T	G	0.31309	0.0013855	0.0014304	0.33271	genotyped	1	T	G	0.31359	-0.0014841	0.0015452	0.33681	imputed	0.906	N/A	N/A	N/A	N/A	N/A	N/A	t	g	-2.406	0.01613	-+--	t
1	FPG	rs1260326	2	27584444	GCKR	T	C	0.32987	-0.0058207	0.0020426	0.0043761	genotyped	1	T	C	0.12233	0.0010701	0.0017185	0.53349	genotyped	1	T	C	0.39722	-0.004503	0.001327	0.00069011	genotyped	1	T	C	0.34253	-0.003747	0.0014325	0.008907	genotyped	1	T	C	0.4093	-0.004559	0.00115	7.61e-05	t	c	-4.148	3.36e-05	+---	t
1	FPG	rs1260333	2	27602128	GCKR / LOC100130981	G	A	0.63319	0.0049312	0.001976	0.012579	imputed	0.987	G	A	0.61595	0.00036431	0.0011757	0.75667	genotyped	0.914	G	A	0.55122	0.0039136	0.001311	0.0028347	genotyped	1	G	A	0.67312	0.002769	0.0014941	0.063832	imputed	0.967	A	G	0.4454	-0.00373	0.001127	0.0009484	a	g	-3.835	0.0001255	----	a
1	FPG	rs17498401	2	32847983	TTC27	T	A	0.66726	-0.0089787	0.0019865	6.19e-06	imputed	0.996	T	A	0.83139	0.0025585	0.001484	0.084705	imputed	0.997	T	A	0.5981	-0.0025622	0.001323	0.052783	imputed	0.994	T	A	0.61802	-0.0017615	0.0014262	0.21681	imputed	0.991	N/A	N/A	N/A	N/A	N/A	N/A	a	t	2.802	0.005075	-+++	a
1	FPG	rs10192659	2	32853027	TTC27	T	C	0.66512	-0.0089924	0.0019868	6.01e-06	imputed	0.99	T	C	0.80754	0.0033471	0.0014709	0.02287	imputed	0.927	T	C	0.60393	-0.0024505	0.0013313	0.065667	imputed	0.99	T	C	0.61843	-0.0016532	0.0014186	0.24386	genotyped	1	N/A	N/A	N/A	N/A	N/A	N/A	t	c	-2.444	0.01452	+---	t
1	FPG	rs220652	2	32861496	TTC27	T	G	0.33325	0.0089711	0.001984	6.13e-06	imputed	0.998	T	G	0.18352	-0.0031742	0.0014548	0.029119	imputed	0.987	T	G	0.39609	0.00239	0.0013311	0.072579	imputed	0.989	T	G	0.38269	0.0017062	0.0014281	0.23218	imputed	0.994	N/A	N/A	N/A	N/A	N/A	N/A	t	g	2.479	0.01319	-+++	t
1	FPG	rs220654	2	32865025	TTC27	G	A	0.33148	0.0091378	0.0019916	4.47e-06	imputed	0.999	G	A	0.16806	-0.0026901	0.0014907	0.071137	imputed	0.994	G	A	0.39982	0.002122	0.0013218	0.10842	imputed	0.994	G	A	0.38229	0.0016809	0.0014259	0.23846	imputed	0.995	N/A	N/A	N/A	N/A	N/A	N/A	a	g	-2.579	0.009908	+---	a
1	FPG	rs1125948	2	32882080	TTC27	G	A	0.65789	-0.0087266	0.0019633	8.79e-06	genotyped	1	G	A	0.83209	0.0034629	0.0014926	0.020337	genotyped	1	G	A	0.60205	-0.0022235	0.0013179	0.091592	imputed	0.994	G	A	0.57317	-8.63e-05	0.0014194	0.95151	imputed	0.974	N/A	N/A	N/A	N/A	N/A	N/A	a	g	1.733	0.08307	-+++	a
1	FPG	rs9308929	2	32884862	TTC27	G	A	0.54712	-0.0090466	0.0019063	2.08e-06	genotyped	1	G	A	0.30279	7.95e-05	0.0011879	0.94664	genotyped	1	G	A	0.48135	-0.0019419	0.0013002	0.13529	genotyped	1	G	A	0.52589	0.00040779	0.0013597	0.76424	genotyped	1	N/A	N/A	N/A	N/A	N/A	N/A	a	g	2.678	0.007407	-++-	a
1	FPG	rs3769567	2	32887561	TTC27	C	A	0.64688	-0.0090092	0.0019608	4.33e-06	genotyped	1	C	A	0.76279	0.0026622	0.0012985	0.040339	genotyped	1	C	A	0.57462	-0.0021355	0.0013035	0.10136	genotyped	1	C	A	0.5747	-0.00025321	0.0014049	0.85697	genotyped	1	N/A	N/A	N/A	N/A	N/A	N/A	a	c	1.965	0.04945	-+++	a
1	FPG	rs927088	2	32890721	TTC27	G	A	0.32607	0.0098054	0.002023	1.25e-06	imputed	0.958	N/A	N/A	N/A	N/A	N/A	N/A	N/A	N/A	G	A	0.40515	0.0024391	0.0013223	0.065102	imputed	0.974	G	A	0.40543	0.00033095	0.0014709	0.82198	imputed	0.924	N/A	N/A	N/A	N/A	N/A	N/A	a	g	-3.699	0.0002167	?---	a
1	FPG	rs3820915	2	32899133	TTC27	G	C	0.34352	0.0090375	0.0019773	4.86e-06	imputed	0.986	G	C	0.1498	-0.00407	0.0015732	0.0096815	imputed	0.979	G	C	0.40756	0.0024347	0.0013105	0.063186	imputed	0.99	G	C	0.43187	0.00038825	0.001408	0.78274	imputed	0.986	N/A	N/A	N/A	N/A	N/A	N/A	c	g	-1.861	0.06271	+---	c
1	FPG	rs7602181	2	32904140	TTC27 / LTBP1	G	A	0.34118	0.0092279	0.0020213	4.99e-06	imputed	0.952	G	A	0.21715	-0.0029044	0.0013609	0.032832	genotyped	0.997	G	A	0.40138	0.0025103	0.0013416	0.061325	imputed	0.95	G	A	0.41893	-3.49e-05	0.0014276	0.9805	imputed	0.978	N/A	N/A	N/A	N/A	N/A	N/A	a	g	-1.935	0.05304	+--+	a
1	FPG	rs13033415	2	32907786	TTC27 / LTBP1	G	A	0.42391	0.0088296	0.0019648	6.99e-06	imputed	0.926	N/A	N/A	N/A	N/A	N/A	N/A	N/A	N/A	N/A	N/A	N/A	N/A	N/A	N/A	N/A	N/A	N/A	N/A	N/A	N/A	N/A	N/A	N/A	N/A	N/A	N/A	N/A	N/A	N/A	N/A	a	g	-4.494	6.99e-06	??-?	N/A
1	FPG	rs13431652	2	169461661	SPC25 / G6PC2	N/A	N/A	N/A	N/A	N/A	N/A	N/A	N/A	N/A	N/A	N/A	N/A	N/A	N/A	N/A	N/A	T	C	0.70683	0.008206	0.0015221	6.99e-08	imputed	0.933	N/A	N/A	N/A	N/A	N/A	N/A	N/A	N/A	N/A	N/A	N/A	N/A	N/A	N/A	t	c	5.391	6.99e-08	?+??	t
1	FPG	rs1402837	2	169465600	G6PC2	T	C	0.1732	0.0042994	0.0025157	0.087449	genotyped	0.998	T	C	0.31535	0.0015203	0.0012009	0.20552	genotyped	1	T	C	0.23217	0.0035394	0.0015383	0.021399	genotyped	1	T	C	0.34847	0.0064969	0.001473	1.03e-05	genotyped	1	N/A	N/A	N/A	N/A	N/A	N/A	t	c	4.906	9.28e-07	++++	t
1	FPG	rs573225	2	169465787	G6PC2	G	A	0.15606	-0.0089696	0.0026162	0.00060705	genotyped	1	G	A	0.066512	-0.0024322	0.0022549	0.28075	genotyped	1	G	A	0.31163	-0.0080541	0.0014592	3.4e-08	imputed	0.988	G	A	0.064092	-0.0013232	0.0027831	0.63448	genotyped	0.997	N/A	N/A	N/A	N/A	N/A	N/A	a	g	5.311	1.09e-07	++++	a
1	FPG	rs560887	2	169471394	G6PC2	T	C	0.13698	-0.0097791	0.0027532	0.00038251	genotyped	0.999	T	C	0.040465	-0.0032787	0.0027217	0.22834	genotyped	1	T	C	0.29005	-0.0084441	0.0014897	1.44e-08	genotyped	1	T	C	0.032258	-0.0047032	0.0037988	0.21569	genotyped	1	T	C	0.2909	-0.005378	0.00124	1.51e-05	t	c	-5.901	3.61e-09	----	t
1	FPG	rs563694	2	169482317	G6PC2 / ABCB11	C	A	0.16095	-0.0076897	0.0026228	0.0033689	genotyped	1	C	A	0.094884	0.00026711	0.0019174	0.88921	genotyped	1	C	A	0.34053	-0.0069344	0.0014292	1.22e-06	genotyped	1	C	A	0.042869	-0.0022879	0.0033299	0.49202	genotyped	1	C	A	0.3368	-0.005155	0.001176	1.22e-05	a	c	4.237	2.27e-05	-+++	a
1	FPG	rs537183	2	169482892	G6PC2 / ABCB11	T	C	0.83905	0.0076897	0.0026228	0.0033688	genotyped	1	T	C	0.905116	-0.00026711	0.0019174	0.88921	genotyped	1	T	C	0.65949	0.0069342	0.0014292	1.22e-06	imputed	1	T	C	0.957131	0.0022879	0.0033299	0.49204	genotyped	1	N/A	N/A	N/A	N/A	N/A	N/A	t	c	4.237	2.27e-05	-+++	t
1	FPG	rs502570	2	169483205	G6PC2 / ABCB11	G	A	0.80044	0.0064642	0.0024087	0.0072827	imputed	0.993	N/A	N/A	N/A	N/A	N/A	N/A	N/A	N/A	G	A	0.65597	0.006952	0.0014349	1.27e-06	imputed	0.974	G	A	0.929115	-0.002659	0.0026594	0.31737	genotyped	1	N/A	N/A	N/A	N/A	N/A	N/A	a	g	-3.821	0.0001332	?--+	a
1	FPG	rs475612	2	169484992	G6PC2 / ABCB11	T	C	0.20563	-0.0052633	0.0023914	0.027742	genotyped	1	T	C	0.16093	-0.0011239	0.0015003	0.4538	genotyped	1	T	C	0.34895	-0.0066732	0.0014526	4.35e-06	imputed	0.932	T	C	0.062818	0.0011712	0.0028251	0.67846	genotyped	1	N/A	N/A	N/A	N/A	N/A	N/A	t	c	-3.649	0.0002628	---+	t
1	FPG	rs557462	2	169485841	ABCB11	T	C	0.84455	0.0078823	0.0026432	0.002863	genotyped	1	T	C	0.952558	0.0020373	0.0026594	0.44363	genotyped	1	T	C	0.65509	0.0067716	0.001445	2.78e-06	imputed	0.954	T	C	0.956706	0.001972	0.0033163	0.55208	genotyped	1	N/A	N/A	N/A	N/A	N/A	N/A	t	c	4.564	5.01e-06	++++	t
1	FPG	rs486981	2	169490395	ABCB11	G	A	0.79437	0.0052181	0.0023463	0.026152	genotyped	1	G	A	0.83581	-0.001249	0.0015092	0.40789	genotyped	1	G	A	0.65512	0.0067865	0.0014223	1.83e-06	imputed	0.985	G	A	0.938455	-0.0047616	0.0028692	0.097003	genotyped	1	N/A	N/A	N/A	N/A	N/A	N/A	a	g	-2.34	0.01927	+--+	a
1	FPG	rs484066	2	169490727	ABCB11	T	A	0.28091	-0.0034988	0.0022128	0.11384	genotyped	1	T	A	0.42722	-0.00067286	0.0011474	0.55758	genotyped	0.991	T	A	0.63621	0.0067466	0.0014052	1.58e-06	genotyped	0.989	T	A	0.65163	-0.0052782	0.0014659	0.00031747	imputed	0.979	N/A	N/A	N/A	N/A	N/A	N/A	a	t	0.157	0.8749	+-++	a
1	FPG	rs483234	2	169490820	ABCB11	T	C	0.53488	0.0021774	0.0019935	0.27473	genotyped	1	T	C	0.951163	0.0073473	0.0025502	0.0039636	genotyped	1	T	C	0.67666	-0.0024021	0.0014034	0.086956	genotyped	1	T	C	0.46774	0.0068194	0.0014132	1.4e-06	genotyped	1	N/A	N/A	N/A	N/A	N/A	N/A	t	c	3.423	0.0006191	+-++	t
1	FPG	rs569805	2	169491126	ABCB11	N/A	N/A	N/A	N/A	N/A	N/A	N/A	N/A	T	A	0.83581	-0.001249	0.0015092	0.40789	imputed	1	T	A	0.65515	0.0067864	0.0014224	1.83e-06	imputed	0.985	T	A	0.938068	-0.0049474	0.002881	0.085932	imputed	0.993	N/A	N/A	N/A	N/A	N/A	N/A	a	t	-1.501	0.1333	+-?+	a
1	FPG	rs579060	2	169491285	ABCB11	T	G	0.79437	0.0052183	0.0023463	0.026148	genotyped	1	T	G	0.83581	-0.001249	0.0015092	0.40789	genotyped	1	T	G	0.65515	0.0067864	0.0014224	1.83e-06	imputed	0.985	T	G	0.938031	-0.0052931	0.0028612	0.064322	genotyped	1	N/A	N/A	N/A	N/A	N/A	N/A	t	g	2.242	0.02496	-++-	t
1	FPG	rs508506	2	169493201	ABCB11	C	A	0.84132	0.0075976	0.002599	0.0034636	imputed	0.996	C	A	0.901855	0.00051455	0.0018759	0.78386	genotyped	1	C	A	0.65817	0.0066756	0.0014274	2.92e-06	imputed	0.989	C	A	0.96562	-0.001393	0.0037907	0.71326	genotyped	1	N/A	N/A	N/A	N/A	N/A	N/A	a	c	-3.796	0.0001471	---+	a
1	FPG	rs494874	2	169497552	ABCB11	T	C	0.16095	-0.0077319	0.0025868	0.0027992	genotyped	1	T	C	0.15535	-0.0021357	0.0015647	0.17229	genotyped	1	T	C	0.34165	-0.0066624	0.0014244	2.91e-06	imputed	0.991	T	C	0.03438	0.001393	0.0037907	0.71326	genotyped	1	N/A	N/A	N/A	N/A	N/A	N/A	t	c	-4.361	1.29e-05	---+	t
1	FPG	rs853789	2	169509734	ABCB11	N/A	N/A	N/A	N/A	N/A	N/A	N/A	N/A	N/A	N/A	N/A	N/A	N/A	N/A	N/A	N/A	G	A	0.66396	0.0064455	0.0014457	8.25e-06	imputed	0.974	G	A	0.962461	0.002122	0.0035797	0.55332	imputed	0.952	N/A	N/A	N/A	N/A	N/A	N/A	a	g	-3.671	0.0002417	?-?-	a
1	FPG	rs853774	2	169521642	ABCB11	G	A	0.53917	0.0034856	0.0019725	0.077202	genotyped	1	G	A	0.953953	0.003132	0.0026115	0.23042	genotyped	1	G	A	0.67081	-0.00028255	0.0013974	0.83976	genotyped	1	G	A	0.4966	0.0064887	0.0013996	3.55e-06	genotyped	1	N/A	N/A	N/A	N/A	N/A	N/A	a	g	-3.625	0.0002888	-+--	a
1	FPG	rs2162514	2	170352610	AF357534 / LOC100128621	T	G	0.46051	0.0042076	0.0019092	0.027537	imputed	0.994	T	G	0.2851	0.00020879	0.0012584	0.86822	imputed	0.964	T	G	0.29037	0.00097757	0.0014519	0.50076	imputed	0.995	T	G	0.54445	-0.0063838	0.0014326	8.35e-06	imputed	0.992	N/A	N/A	N/A	N/A	N/A	N/A	t	g	-0.895	0.3708	+++-	t
1	FPG	rs10930379	2	170352795	AF357534 / LOC100128621	G	A	0.53986	-0.0042101	0.0019111	0.027593	imputed	0.993	G	A	0.71486	-0.0002179	0.0012593	0.86262	imputed	0.963	G	A	0.71008	-0.00091573	0.0014515	0.52813	imputed	0.996	G	A	0.45554	0.0063844	0.0014327	8.34e-06	imputed	0.992	N/A	N/A	N/A	N/A	N/A	N/A	a	g	-0.915	0.3599	+++-	a
1	FPG	rs13404412	2	180711995	KIAA1604 / LOC729009	T	C	0.66826	-0.0020297	0.0020189	0.31474	imputed	0.983	T	C	0.644	-0.0025544	0.0012135	0.035288	imputed	0.924	T	C	0.76088	-0.0073857	0.001589	3.35e-06	imputed	0.981	T	C	0.77801	0.0024355	0.0016282	0.13471	imputed	0.994	N/A	N/A	N/A	N/A	N/A	N/A	t	c	-3.277	0.00105	---+	t
1	FPG	rs982813	2	180713919	KIAA1604 / LOC729009	G	C	0.66521	-0.0022876	0.0020135	0.25591	imputed	0.987	G	C	0.6477	-0.0023836	0.0012029	0.047523	imputed	0.939	G	C	0.75928	-0.007371	0.0015944	3.78e-06	imputed	0.97	G	C	0.77745	0.0025168	0.0016342	0.12354	imputed	0.98	C	G	0.2297	-0.0001077	0.001345	0.9362	c	g	3.235	0.001215	+++-	c
1	FPG	rs11900518	2	180717205	KIAA1604 / LOC729009	T	C	0.67136	-0.0022569	0.0020181	0.26342	genotyped	1	T	C	0.65256	-0.0024256	0.0011744	0.038886	genotyped	1	T	C	0.76225	-0.0073265	0.0015785	3.46e-06	genotyped	1	T	C	0.77961	0.0025069	0.0016343	0.12505	imputed	0.99	N/A	N/A	N/A	N/A	N/A	N/A	t	c	-3.282	0.001029	---+	t
1	FPG	rs11900565	2	180717248	KIAA1604 / LOC729009	T	C	0.67075	-0.0021485	0.0020189	0.28725	genotyped	1	T	C	0.6386	-0.0026981	0.0011896	0.023323	genotyped	1	T	C	0.76225	-0.0073265	0.0015785	3.46e-06	genotyped	1	T	C	0.77756	0.0024054	0.0016357	0.14141	imputed	0.98	N/A	N/A	N/A	N/A	N/A	N/A	t	c	-3.392	0.0006949	---+	t
1	FPG	rs11689740	2	180725096	KIAA1604 / LOC729009	G	C	0.32465	0.0021339	0.0020862	0.30636	imputed	0.93	G	C	0.3717	0.0028271	0.0012261	0.021122	imputed	0.928	G	C	0.23367	0.008294	0.0016333	3.81e-07	imputed	0.957	G	C	0.21775	-0.0028485	0.0016715	0.088358	imputed	0.963	N/A	N/A	N/A	N/A	N/A	N/A	c	g	-3.514	0.0004406	---+	c
1	FPG	rs6433837	2	180778228	KIAA1604 / LOC729009	T	C	0.61383	-0.0012643	0.0019353	0.51358	genotyped	1	T	C	0.45767	-0.0018928	0.0010997	0.085218	genotyped	1	T	C	0.6496	-0.0063181	0.0013584	3.3e-06	genotyped	1	T	C	0.65349	0.0004618	0.0014505	0.75021	imputed	0.983	N/A	N/A	N/A	N/A	N/A	N/A	t	c	-3.545	0.0003924	---+	t
1	FPG	rs7580896	2	180791941	KIAA1604 / LOC729009	G	A	0.35067	0.0026566	0.0019566	0.17455	genotyped	1	G	A	0.11674	0.0032042	0.0017121	0.061278	genotyped	1	G	A	0.27579	0.0061745	0.0014744	2.82e-05	genotyped	1	N/A	N/A	N/A	N/A	N/A	N/A	N/A	N/A	G	A	0.2659	0.001881	0.001272	0.1394	a	g	-4.467	7.93e-06	---?	a
1	FPG	rs17063156	3	60414083	FHIT	T	C	0.12974	-0.0011748	0.002764	0.67081	genotyped	1	T	C	0.15721	0.0011237	0.0015661	0.47306	genotyped	1	T	C	0.061096	-0.0019705	0.0027613	0.47548	genotyped	1	T	C	0.34677	0.0063153	0.0014218	8.92e-06	genotyped	1	N/A	N/A	N/A	N/A	N/A	N/A	t	c	2.063	0.03908	+--+	t
1	FPG	rs17280690	3	81394786	LOC728290 / LOC100127895	T	C	0.953488	0.0059859	0.0044359	0.1772	genotyped	1	T	C	0.988879	-0.02461	0.0054976	7.59e-06	genotyped	0.947	T	C	0.910388	0.0017119	0.002268	0.45036	genotyped	1	T	C	0.89983	0.0013594	0.0022251	0.54123	genotyped	1	N/A	N/A	N/A	N/A	N/A	N/A	t	c	-0.891	0.3731	-+++	t
1	FPG	rs4839610	3	145008940	SLC9A9	T	C	0.74051	-0.0073416	0.0021671	0.00070456	genotyped	1	T	C	0.32657	-0.0013772	0.0012016	0.25176	genotyped	0.998	T	C	0.76152	-0.0032612	0.0015097	0.030761	genotyped	1	T	C	0.45331	-0.0033157	0.0013759	0.015958	genotyped	1	N/A	N/A	N/A	N/A	N/A	N/A	t	c	-4.459	8.25e-06	----	t
1	FPG	rs1480990	4	34238084	LOC727819	T	C	0.20991	0.0062748	0.0022432	0.005155	genotyped	1	T	C	0.15023	0.0045661	0.0015599	0.0034212	genotyped	1	T	C	0.10534	0.0043884	0.0021236	0.038785	genotyped	1	N/A	N/A	N/A	N/A	N/A	N/A	N/A	N/A	N/A	N/A	N/A	N/A	N/A	N/A	t	c	4.42	9.87e-06	+++?	t
1	FPG	rs1988507	4	67563433	LOC728048 / CENPC1	T	C	0.20602	0.0040508	0.0023385	0.083242	imputed	0.998	T	C	0.41215	0.0034931	0.0011513	0.0024126	imputed	0.997	T	C	0.1985	0.0037867	0.0016497	0.021712	imputed	0.998	T	C	0.38923	0.002966	0.0014157	0.036167	imputed	1	N/A	N/A	N/A	N/A	N/A	N/A	t	c	4.59	4.43e-06	++++	t
1	FPG	rs1435426	4	67572026	LOC728048 / CENPC1	T	C	0.20686	0.0038007	0.0023361	0.10375	genotyped	1	T	C	0.40977	0.0034325	0.0011501	0.0028406	genotyped	1	T	C	0.2063	0.0034765	0.0016341	0.03338	genotyped	0.996	T	C	0.39018	0.0029796	0.0014184	0.035669	imputed	0.995	N/A	N/A	N/A	N/A	N/A	N/A	t	c	4.43	9.4e-06	++++	t
1	FPG	rs6824830	4	70520216	UGT2A1	T	C	0.85442	0.0021674	0.0025989	0.40429	imputed	0.991	T	C	0.80516	-0.006846	0.001461	2.79e-06	genotyped	0.993	T	C	0.77166	0.0012197	0.0015601	0.43431	imputed	0.993	T	C	0.79117	0.00052633	0.0016836	0.75457	genotyped	1	N/A	N/A	N/A	N/A	N/A	N/A	t	c	-1.353	0.1759	-+++	t
1	FPG	rs13129549	4	70527168	UGT2A2	C	A	0.14514	-0.0022693	0.0025992	0.38264	imputed	0.999	C	A	0.19313	0.0067248	0.0014608	4.16e-06	imputed	0.998	C	A	0.22842	-0.0013013	0.0015613	0.40457	imputed	0.992	C	A	0.20799	-0.00059737	0.0016895	0.72365	imputed	0.997	N/A	N/A	N/A	N/A	N/A	N/A	a	c	-1.246	0.2126	-+++	a
1	FPG	rs1106136	5	1712414	LOC728613 / MRPL36	C	A	0.76438	-0.0010816	0.0022487	0.63052	genotyped	1	C	A	0.909767	0.00017369	0.0019619	0.92945	genotyped	1	C	A	0.918421	0.00066473	0.0024419	0.78546	imputed	0.985	C	A	0.85993	-0.0088807	0.0019739	6.83e-06	genotyped	1	N/A	N/A	N/A	N/A	N/A	N/A	a	c	2.33	0.01981	--++	a
1	FPG	rs11951463	5	95409343	LOC441097	G	A	0.55998	0.0044405	0.0019388	0.022001	genotyped	1	G	A	0.47721	0.0016479	0.0010983	0.1335	genotyped	1	G	A	0.37405	0.0033915	0.0013537	0.012231	imputed	0.976	G	A	0.48769	0.0034625	0.0013614	0.010981	genotyped	1	N/A	N/A	N/A	N/A	N/A	N/A	a	g	-4.422	9.76e-06	----	a
1	FPG	rs17085428	5	95413771	LOC441097	G	A	0.78519	0.0060853	0.002336	0.0091862	genotyped	1	G	A	0.87256	0.0015358	0.0016436	0.35009	genotyped	1	G	A	0.70154	0.0046785	0.0014367	0.0011282	genotyped	1	G	A	0.66214	0.0044889	0.0014406	0.0018328	genotyped	1	N/A	N/A	N/A	N/A	N/A	N/A	a	g	-4.991	6.01e-07	----	a
1	FPG	rs4538631	5	95431099	LOC441097	T	C	0.2295	-0.0055738	0.0022671	0.013948	genotyped	1	T	C	0.40419	-0.00053444	0.0011226	0.63403	genotyped	1	T	C	0.30761	-0.0055587	0.001421	9.16e-05	genotyped	1	T	C	0.43175	-0.0037862	0.0013872	0.0063441	imputed	0.98	N/A	N/A	N/A	N/A	N/A	N/A	t	c	-4.867	1.13e-06	----	t
1	FPG	rs4365863	5	95463367	LOC441097	G	A	0.75328	0.0044216	0.0022113	0.045549	imputed	0.947	G	A	0.64222	0.00083335	0.0012317	0.49866	genotyped	0.909	G	A	0.67973	0.0059988	0.0014344	2.89e-05	imputed	0.946	G	A	0.56624	0.0035903	0.0013963	0.010133	imputed	0.962	N/A	N/A	N/A	N/A	N/A	N/A	a	g	-4.837	1.32e-06	----	a
1	FPG	rs4330486	5	95471075	LOC441097	G	C	0.75433	0.0044074	0.0022107	0.046186	imputed	0.953	G	C	0.64342	0.00082747	0.0012342	0.50258	imputed	0.91	G	C	0.68318	0.0061019	0.0014286	1.94e-05	imputed	0.962	G	C	0.56633	0.0035503	0.0013988	0.011143	imputed	0.961	N/A	N/A	N/A	N/A	N/A	N/A	c	g	-4.864	1.15e-06	----	c
1	FPG	rs6875999	5	95496745	LOC441097	G	A	0.24663	-0.0040288	0.0021872	0.065475	genotyped	1	G	A	0.45535	-0.000733	0.0011301	0.51657	genotyped	1	G	A	0.31346	-0.0062034	0.0014307	1.45e-05	genotyped	1	G	A	0.42869	-0.0040168	0.0013802	0.0036113	genotyped	1	N/A	N/A	N/A	N/A	N/A	N/A	a	g	5.016	5.28e-07	++++	a
1	FPG	rs4869272	5	95565204	LOC441097	T	C	0.76622	0.0066421	0.0022192	0.0027622	genotyped	1	T	C	0.79953	0.00075992	0.0014109	0.59016	genotyped	1	T	C	0.68544	0.0057453	0.0014366	6.36e-05	genotyped	1	T	C	0.63497	0.0048819	0.0014119	0.00054468	genotyped	1	N/A	N/A	N/A	N/A	N/A	N/A	t	c	5.551	2.84e-08	++++	t
1	FPG	rs4869273	5	95565292	LOC441097	T	C	0.76553	0.006419	0.0022313	0.004018	imputed	0.994	T	C	0.77646	0.00059505	0.001373	0.66472	imputed	0.991	T	C	0.68089	0.0055346	0.0014225	9.99e-05	imputed	0.998	T	C	0.63371	0.004681	0.0014065	0.00087427	imputed	1	N/A	N/A	N/A	N/A	N/A	N/A	t	c	5.322	1.03e-07	++++	t
1	FPG	rs13179048	5	95568482	LOC441097	C	A	0.78178	0.0061811	0.0022754	0.0065983	imputed	0.998	N/A	N/A	N/A	N/A	N/A	N/A	N/A	N/A	C	A	0.69649	0.0055961	0.0014463	0.00010916	imputed	0.992	C	A	0.64253	0.0051365	0.0014231	0.00030682	imputed	0.996	N/A	N/A	N/A	N/A	N/A	N/A	a	c	-5.943	2.8e-09	?---	a
1	FPG	rs12186664	5	95655981	LOC441097 / PCSK1	T	A	0.24055	-0.0060936	0.0022158	0.0059584	imputed	0.985	T	A	0.1844	-0.00046769	0.0014638	0.74934	imputed	0.977	T	A	0.32301	-0.0058637	0.0014188	3.58e-05	imputed	0.983	T	A	0.37966	-0.0051088	0.0014198	0.00032023	imputed	0.982	N/A	N/A	N/A	N/A	N/A	N/A	a	t	5.485	4.12e-08	++++	a
1	FPG	rs17085593	5	95656461	LOC441097 / PCSK1	G	C	0.22933	-0.0068097	0.0022481	0.0024523	imputed	0.985	N/A	N/A	N/A	N/A	N/A	N/A	N/A	N/A	G	C	0.31885	-0.005837	0.0014215	4.02e-05	imputed	0.998	G	C	0.37557	-0.0053028	0.0014214	0.00019086	imputed	0.991	G	C	0.3239	-0.005202	0.001193	1.36e-05	c	g	6.32	2.62e-10	?+++	c
1	FPG	rs10040098	5	95700022	LOC441097 / PCSK1	T	C	0.23159	-0.0060447	0.0022711	0.0077764	imputed	0.935	N/A	N/A	N/A	N/A	N/A	N/A	N/A	N/A	T	C	0.29852	-0.0070979	0.0014789	1.59e-06	imputed	0.944	T	C	0.38013	-0.0047179	0.0014166	0.00086751	imputed	0.96	N/A	N/A	N/A	N/A	N/A	N/A	t	c	-6.344	2.24e-10	?---	t
1	FPG	rs6863434	5	95721429	LOC441097 / PCSK1	T	C	0.22956	-0.0051545	0.0022452	0.021688	imputed	0.989	T	C	0.31908	-0.00060959	0.0012154	0.61599	imputed	0.97	T	C	0.2968	-0.0068718	0.0014585	2.46e-06	imputed	0.977	T	C	0.38583	-0.0045077	0.0013906	0.0011887	imputed	0.998	N/A	N/A	N/A	N/A	N/A	N/A	t	c	-5.517	3.44e-08	----	t
1	FPG	rs10476552	5	95734888	LOC441097 / PCSK1	T	C	0.77601	0.0056296	0.0022547	0.01253	genotyped	1	T	C	0.77163	0.00088059	0.0013555	0.51593	genotyped	1	T	C	0.70849	0.0071207	0.0014528	9.52e-07	genotyped	1	T	C	0.6146	0.004611	0.0013897	0.00090657	genotyped	1	N/A	N/A	N/A	N/A	N/A	N/A	t	c	5.821	5.84e-09	++++	t
1	FPG	rs7713317	5	95742478	LOC441097 / PCSK1	G	A	0.2198	-0.0061319	0.0022995	0.0076624	imputed	0.996	N/A	N/A	N/A	N/A	N/A	N/A	genotyped	NA	G	A	0.28215	-0.0071833	0.0015006	1.69e-06	imputed	0.959	G	A	0.35141	-0.0045059	0.0014119	0.0014162	imputed	0.999	N/A	N/A	N/A	N/A	N/A	N/A	a	g	6.256	3.95e-10	?+++	a
1	FPG	rs7722200	5	95743196	LOC441097 / PCSK1	T	C	0.77723	0.0056136	0.0022555	0.012815	genotyped	1	T	C	0.76558	0.00085471	0.001343	0.52449	genotyped	1	T	C	0.70849	0.0071207	0.0014528	9.52e-07	genotyped	1	T	C	0.61423	0.0044149	0.0013903	0.0014953	imputed	0.998	N/A	N/A	N/A	N/A	N/A	N/A	t	c	5.738	9.58e-09	++++	t
1	FPG	rs10213965	5	95745423	LOC441097 / PCSK1	G	C	0.77722	0.0056134	0.0022555	0.01282	imputed	1	G	C	0.77083	0.00091551	0.0013753	0.50561	imputed	0.969	G	C	0.7118	0.0072198	0.0014694	8.95e-07	imputed	0.984	G	C	0.61505	0.0044226	0.0013929	0.0014974	imputed	0.995	N/A	N/A	N/A	N/A	N/A	N/A	c	g	-5.759	8.47e-09	----	c
1	FPG	rs17085655	5	95745560	LOC441097 / PCSK1	G	A	0.22528	-0.0057064	0.0022464	0.011076	imputed	1	G	A	0.28645	-0.00077878	0.0012546	0.53477	imputed	1	G	A	0.29159	-0.0071267	0.0014534	9.42e-07	imputed	0.998	G	A	0.38589	-0.0044124	0.0013905	0.0015075	imputed	0.998	N/A	N/A	N/A	N/A	N/A	N/A	a	g	5.752	8.8e-09	++++	a
1	FPG	rs17085675	5	95753420	PCSK1	T	A	0.22441	-0.0050149	0.0023009	0.02929	imputed	0.993	T	A	0.46785	-0.0011126	0.0011297	0.32472	imputed	0.972	T	A	0.27939	-0.0072822	0.0015151	1.54e-06	imputed	0.94	T	A	0.3489	-0.0042516	0.0014166	0.0026887	genotyped	1	N/A	N/A	N/A	N/A	N/A	N/A	a	t	5.634	1.76e-08	++++	a
1	FPG	rs6235	5	95754654	PCSK1	G	C	0.21297	-0.0052013	0.0023123	0.024485	imputed	1	G	C	0.17561	-0.00021151	0.0014627	0.88503	imputed	0.963	G	C	0.27791	-0.0073041	0.0015177	1.49e-06	imputed	0.94	G	C	0.34867	-0.0042621	0.0014162	0.0026172	imputed	0.999	G	C	0.2723	-0.006755	0.001247	6.67e-08	c	g	5.258	1.45e-07	++++	c
1	FPG	rs6234	5	95754730	PCSK1	G	C	0.7858	0.0049583	0.002311	0.031915	genotyped	1	G	C	0.7923	-0.00054162	0.0013864	0.69605	genotyped	0.967	G	C	0.72111	0.0072861	0.0015151	1.52e-06	imputed	0.941	G	C	0.65153	0.0043399	0.0014136	0.0021395	genotyped	1	N/A	N/A	N/A	N/A	N/A	N/A	c	g	-4.98	6.37e-07	+---	c
1	FPG	rs13168460	5	95758325	PCSK1	T	A	0.21297	-0.0052013	0.0023123	0.024485	imputed	1	T	A	0.17561	-0.00021152	0.0014627	0.88502	imputed	0.963	T	A	0.27791	-0.0073036	0.0015177	1.49e-06	imputed	0.94	T	A	0.34846	-0.0043399	0.0014136	0.0021404	imputed	1	N/A	N/A	N/A	N/A	N/A	N/A	a	t	5.289	1.23e-07	++++	a
1	FPG	rs3811951	5	95788233	PCSK1	G	A	0.21757	-0.0045073	0.0023308	0.053133	imputed	0.962	G	A	0.32969	-0.0016967	0.0011963	0.15611	imputed	0.967	G	A	0.27951	-0.0058417	0.0014995	9.79e-05	imputed	0.953	G	A	0.22077	-0.0026146	0.0016622	0.11572	imputed	0.97	N/A	N/A	N/A	N/A	N/A	N/A	a	g	4.501	6.77e-06	++++	a
1	FPG	rs17518545	5	133225380	FSTL4 / C5orf15	T	G	0.954706	-0.0063122	0.0046807	0.17748	imputed	1	T	G	0.974784	-0.0078517	0.0036101	0.029635	imputed	0.967	T	G	0.954657	-0.0069833	0.0031297	0.025661	imputed	0.99	T	G	0.919149	-0.0074956	0.0024915	0.0026256	imputed	0.997	N/A	N/A	N/A	N/A	N/A	N/A	t	g	-4.438	9.09e-06	----	t
1	FPG	rs29843	5	151482767	GLRA1 / NMUR2	T	A	0.6332	-0.0059075	0.0019467	0.0024078	imputed	0.961	T	A	0.66015	-0.0037966	0.0012318	0.0020547	imputed	0.977	T	A	0.40932	-0.0019854	0.00135	0.14136	imputed	0.967	T	A	0.65316	-0.0028646	0.0014451	0.047444	imputed	0.998	N/A	N/A	N/A	N/A	N/A	N/A	a	t	4.657	3.21e-06	++++	a
1	FPG	rs29842	5	151483717	GLRA1 / NMUR2	T	C	0.62801	-0.0055445	0.0019403	0.0042689	imputed	0.952	T	C	0.65979	-0.0037945	0.0012315	0.0020623	imputed	0.978	T	C	0.40902	-0.0019728	0.0013497	0.14383	imputed	0.969	T	C	0.65322	-0.0028698	0.0014452	0.047054	imputed	0.996	N/A	N/A	N/A	N/A	N/A	N/A	t	c	-4.577	4.71e-06	----	t
1	FPG	rs9353762	6	91524108	MAP3K7 / LOC100129847	G	A	0.5257	-0.0014682	0.0019251	0.44567	genotyped	1	G	A	0.82233	-0.0070057	0.0014676	1.81e-06	genotyped	1	G	A	0.68443	-0.00028036	0.0014527	0.84697	imputed	0.998	G	A	0.68039	0.00056524	0.001466	0.69982	genotyped	1	N/A	N/A	N/A	N/A	N/A	N/A	a	g	2.585	0.00973	+++-	a
1	FPG	rs9362782	6	91525318	MAP3K7 / LOC100129847	C	A	0.47448	0.0015077	0.0019287	0.4344	imputed	0.997	C	A	0.17507	0.0071496	0.001472	1.19e-06	imputed	0.999	C	A	0.31552	0.00027743	0.0014525	0.84853	imputed	0.998	C	A	0.31983	-0.00056681	0.0014667	0.69917	imputed	0.999	N/A	N/A	N/A	N/A	N/A	N/A	a	c	-2.633	0.008463	---+	a
1	FPG	rs11758974	6	141219163	LOC729070 / LOC729076	T	C	0.957181	0.0023364	0.0048356	0.62898	imputed	0.992	T	C	0.979547	-0.0037512	0.004012	0.34979	imputed	0.951	T	C	0.91418	-0.010749	0.0024194	8.87e-06	imputed	0.94	T	C	0.901104	0.0021938	0.0022753	0.33495	genotyped	1	N/A	N/A	N/A	N/A	N/A	N/A	t	c	-2.222	0.02627	--++	t
1	FPG	rs2040524	7	88494958	ZNF804B	G	A	0.30049	0.0029046	0.0020469	0.15588	genotyped	1	G	A	0.22	0.0037704	0.0013516	0.0052783	genotyped	1	G	A	0.19861	0.0050977	0.0016529	0.0020422	genotyped	1	G	A	0.24703	0.0026962	0.0016003	0.092025	genotyped	1	N/A	N/A	N/A	N/A	N/A	N/A	a	g	-4.562	5.07e-06	----	a
1	FPG	rs2040525	7	88496056	ZNF804B	G	C	0.7024	-0.002922	0.0020676	0.15759	imputed	0.984	G	C	0.78452	-0.0039077	0.001383	0.0047197	imputed	0.973	G	C	0.80307	-0.0051349	0.0016678	0.002078	imputed	0.988	G	C	0.75687	-0.0027525	0.0016279	0.090868	imputed	0.979	N/A	N/A	N/A	N/A	N/A	N/A	c	g	4.577	4.71e-06	++++	c
1	FPG	rs10228159	7	88496284	ZNF804B	G	A	0.30097	0.0029052	0.0020446	0.15534	imputed	0.998	G	A	0.22022	0.0037771	0.0013528	0.0052375	imputed	0.998	G	A	0.19806	0.0048459	0.0016541	0.0033938	imputed	0.999	G	A	0.24711	0.0026723	0.0016023	0.095354	imputed	0.998	N/A	N/A	N/A	N/A	N/A	N/A	a	g	-4.47	7.84e-06	----	a
1	FPG	rs10271007	7	115933085	CAV2	N/A	N/A	N/A	N/A	N/A	N/A	N/A	N/A	G	A	0.33387	-0.0058419	0.0012361	2.29e-06	imputed	0.977	G	A	0.49393	-0.0014509	0.0013176	0.27081	imputed	0.994	G	A	0.82561	-0.0029038	0.0018182	0.11025	imputed	0.99	N/A	N/A	N/A	N/A	N/A	N/A	a	g	4.163	3.14e-05	++?+	a
1	FPG	rs4730743	7	115933193	CAV2	N/A	N/A	N/A	N/A	N/A	N/A	N/A	N/A	T	A	0.35751	-0.0057011	0.0012326	3.74e-06	imputed	0.968	T	A	0.4939	-0.001453	0.0013172	0.27	imputed	0.994	T	A	0.82619	-0.0029057	0.0018157	0.10952	imputed	0.993	N/A	N/A	N/A	N/A	N/A	N/A	a	t	4.111	3.94e-05	++?+	a
1	FPG	rs4727833	7	115935144	CAV2	N/A	N/A	N/A	N/A	N/A	N/A	N/A	N/A	G	C	0.36461	-0.0054641	0.0012205	7.57e-06	imputed	0.983	G	C	0.49426	-0.0014369	0.0013158	0.27484	imputed	0.997	G	C	0.8264	-0.0027763	0.0018063	0.1243	genotyped	1	N/A	N/A	N/A	N/A	N/A	N/A	c	g	3.988	6.68e-05	++?+	c
1	FPG	rs3919515	7	115939020	CAV2 / CAV1	N/A	N/A	N/A	N/A	N/A	N/A	N/A	N/A	G	C	0.62854	0.0054264	0.0012243	9.32e-06	imputed	0.976	G	C	0.50401	0.0014463	0.0013202	0.27327	imputed	0.99	G	C	0.17364	0.0028141	0.00181	0.12	imputed	0.994	N/A	N/A	N/A	N/A	N/A	N/A	c	g	-3.976	7.02e-05	--?-	c
1	FPG	rs2402754	7	124235708	LOC154872 / POT1	T	A	0.66555	0.0016873	0.0020134	0.40202	imputed	0.995	T	A	0.68286	0.0055801	0.0012518	8.29e-06	imputed	0.986	T	A	0.67455	-0.00041813	0.0014279	0.76965	imputed	0.996	T	A	0.7584	-0.0011397	0.0016087	0.47867	imputed	0.999	N/A	N/A	N/A	N/A	N/A	N/A	a	t	-2.026	0.04275	-+-+	a
1	FPG	rs7795610	7	124238764	LOC154872 / POT1	T	C	0.33544	-0.0016879	0.0020069	0.40033	imputed	0.999	T	C	0.31718	-0.0056426	0.0012543	6.84e-06	imputed	0.985	T	C	0.32626	0.00040024	0.0014258	0.77892	imputed	0.999	T	C	0.24158	0.0011378	0.0016087	0.4794	imputed	0.999	N/A	N/A	N/A	N/A	N/A	N/A	t	c	-2.055	0.03989	-+-+	t
1	FPG	rs6943797	7	124239380	LOC154872 / POT1	G	A	0.33696	-0.0017004	0.0020126	0.39819	imputed	0.992	G	A	0.32127	-0.0056252	0.0012594	7.95e-06	imputed	0.965	G	A	0.33653	0.00040957	0.0014479	0.77727	imputed	0.953	G	A	0.24676	0.0011438	0.0016209	0.4804	imputed	0.971	N/A	N/A	N/A	N/A	N/A	N/A	a	g	2.04	0.0413	+-+-	a
1	FPG	rs7782296	7	124240337	LOC154872 / POT1	G	A	0.66934	0.0017369	0.0020422	0.39505	imputed	0.974	G	A	0.68136	0.0056948	0.0012502	5.24e-06	imputed	0.986	G	A	0.67365	-0.00037992	0.0014287	0.79031	imputed	0.994	G	A	0.75734	-0.0012302	0.0016346	0.45169	imputed	0.97	N/A	N/A	N/A	N/A	N/A	N/A	a	g	-2.072	0.0383	-+-+	a
1	FPG	rs9656320	7	124240385	LOC154872 / POT1	T	A	0.67969	0.0018811	0.0021244	0.37588	imputed	0.917	T	A	0.67809	0.0057362	0.0012816	7.62e-06	imputed	0.927	T	A	0.67753	-0.00041254	0.0014493	0.77592	imputed	0.97	T	A	0.76286	-0.0012765	0.0016889	0.44976	imputed	0.924	N/A	N/A	N/A	N/A	N/A	N/A	a	t	-2.036	0.04179	-+-+	a
1	FPG	rs7787804	7	124264418	POT1	G	A	0.66585	0.001764	0.0020095	0.38004	genotyped	1	G	A	0.68326	0.0057537	0.0012477	4e-06	genotyped	1	G	A	0.67593	-0.00027269	0.0014282	0.84858	genotyped	1	G	A	0.75533	-0.0012409	0.001605	0.43945	imputed	0.999	N/A	N/A	N/A	N/A	N/A	N/A	a	g	-2.142	0.03218	-+-+	a
1	FPG	rs7794637	7	124274216	POT1	T	C	0.29927	-0.0017611	0.0020515	0.39065	genotyped	1	T	C	0.26233	-0.006105	0.0013081	3.06e-06	genotyped	1	T	C	0.3237	0.00048655	0.0014253	0.73283	genotyped	1	T	C	0.23645	0.0012096	0.0016446	0.46206	imputed	0.974	N/A	N/A	N/A	N/A	N/A	N/A	t	c	-2.097	0.03598	-+-+	t
1	FPG	rs11772420	7	124282375	POT1	T	C	0.3321	-0.0017208	0.0020181	0.39382	imputed	0.998	T	C	0.26469	-0.0057928	0.0013021	8.64e-06	imputed	1	T	C	0.3241	0.00027296	0.0014282	0.84843	imputed	1	T	C	0.2407	0.0011835	0.0016124	0.46295	imputed	1	N/A	N/A	N/A	N/A	N/A	N/A	t	c	-2.071	0.03832	-+-+	t
1	FPG	rs12706625	7	124312418	POT1	C	A	0.33231	-0.0016841	0.0020179	0.40394	genotyped	1	C	A	0.25907	-0.0058962	0.0013076	6.51e-06	genotyped	1	C	A	0.3248	0.00024966	0.0014264	0.86106	genotyped	1	C	A	0.24065	0.0011836	0.0016123	0.46287	imputed	1	N/A	N/A	N/A	N/A	N/A	N/A	a	c	2.102	0.03554	+-+-	a
1	FPG	rs2929322	7	124492114	LOC646837 / GRM8	G	A	0.31579	-0.00017681	0.0020463	0.93115	genotyped	1	G	A	0.23395	-0.0060136	0.0013575	9.43e-06	genotyped	1	G	A	0.25238	-0.0016581	0.0015356	0.28026	genotyped	1	G	A	0.24784	0.00059734	0.0015873	0.70667	imputed	0.973	N/A	N/A	N/A	N/A	N/A	N/A	a	g	2.623	0.008718	+++-	a
1	FPG	rs2366241	7	140816246	LOC100131199	T	C	0.81334	-0.010653	0.0023946	8.63e-06	genotyped	1	T	C	0.79628	-0.00041114	0.0013881	0.76709	genotyped	1	T	C	0.87919	0.00019874	0.0021282	0.9256	imputed	0.92	T	C	0.67628	0.00038464	0.0014889	0.79614	imputed	0.945	N/A	N/A	N/A	N/A	N/A	N/A	t	c	-1.87	0.06149	-+-+	t
1	FPG	rs330092	8	9213454	PPP1R3B / LOC100129150	G	A	0.71692	-0.00813	0.0021251	0.00013039	imputed	0.95	N/A	N/A	N/A	N/A	N/A	N/A	N/A	N/A	N/A	N/A	N/A	N/A	N/A	N/A	N/A	N/A	G	A	0.964346	-0.011969	0.0036392	0.0010059	genotyped	1	N/A	N/A	N/A	N/A	N/A	N/A	a	g	4.975	6.51e-07	??++	N/A
1	FPG	rs6984305	8	9215678	PPP1R3B / LOC100129150	T	A	0.77987	-0.010028	0.0023436	1.88e-05	imputed	0.939	N/A	N/A	N/A	N/A	N/A	N/A	N/A	N/A	T	A	0.909796	-0.0025566	0.0023477	0.27615	imputed	0.953	T	A	0.970156	-0.012021	0.0041116	0.0034594	imputed	0.902	N/A	N/A	N/A	N/A	N/A	N/A	a	t	4.534	5.78e-06	?+++	a
1	FPG	rs9987289	8	9220768	PPP1R3B / LOC100129150	G	A	0.78275	-0.010073	0.002295	1.14e-05	imputed	0.993	G	A	0.81036	-0.0030522	0.0014796	0.039128	imputed	0.972	G	A	0.923982	-0.0035888	0.0024847	0.14864	imputed	0.993	G	A	0.971349	-0.012963	0.0041341	0.0017156	imputed	0.957	N/A	N/A	N/A	N/A	N/A	N/A	a	g	5.316	1.06e-07	++++	a
1	FPG	rs4841132	8	9221006	PPP1R3B / LOC100129150	G	A	0.7883	-0.010229	0.0023092	9.44e-06	imputed	0.997	G	A	0.87145	-0.0055682	0.0016956	0.0010234	imputed	0.997	G	A	0.927455	-0.0030548	0.0025481	0.2306	imputed	0.981	G	A	0.971603	-0.013065	0.0041579	0.0016764	imputed	0.965	A	G	0.0896	0.005565	0.001917	0.003738	a	g	5.802	6.56e-09	++++	a
1	FPG	rs4841133	8	9221074	PPP1R3B / LOC100129150	G	A	0.78268	-0.010072	0.0022951	1.14e-05	imputed	0.993	G	A	0.81008	-0.0030467	0.0014802	0.039569	imputed	0.97	G	A	0.924198	-0.0035775	0.0024837	0.14976	imputed	0.996	G	A	0.971458	-0.012983	0.0041218	0.0016337	imputed	0.964	N/A	N/A	N/A	N/A	N/A	N/A	a	g	5.319	1.05e-07	++++	a
1	FPG	rs4240624	8	9221641	PPP1R3B / LOC100129150	G	A	0.21709	0.010001	0.0022918	1.28e-05	imputed	0.995	G	A	0.18961	0.0030629	0.0014797	0.038452	imputed	0.972	G	A	0.075696	0.0035493	0.0024825	0.15279	imputed	0.998	G	A	0.028608	0.012959	0.0041206	0.001661	imputed	0.962	N/A	N/A	N/A	N/A	N/A	N/A	a	g	-5.305	1.12e-07	----	a
1	FPG	rs10106829	8	9222038	PPP1R3B / LOC100129150	G	A	0.66463	-0.0072084	0.0019844	0.00028061	genotyped	1	G	A	0.75491	-0.0043583	0.0013074	0.00085712	genotyped	1	G	A	0.80249	-0.001439	0.0016242	0.37564	genotyped	1	G	A	0.966469	-0.012226	0.0037362	0.0010667	genotyped	1	N/A	N/A	N/A	N/A	N/A	N/A	a	g	5.378	7.55e-08	++++	a
1	FPG	rs6601299	8	9222101	PPP1R3B / LOC100129150	T	C	0.26805	0.00852	0.002136	6.64e-05	imputed	1	T	C	0.13023	0.0057795	0.001681	0.0005859	imputed	1	T	C	0.082091	0.0025942	0.0024226	0.28425	imputed	0.989	T	C	0.029998	0.012994	0.0039854	0.0011129	imputed	0.99	N/A	N/A	N/A	N/A	N/A	N/A	t	c	5.678	1.36e-08	++++	t
1	FPG	rs2126260	8	9222491	PPP1R3B / LOC100129150	T	C	0.34029	0.0073979	0.0019781	0.00018405	imputed	0.994	T	C	0.26292	0.0046288	0.0012768	0.00028859	imputed	0.994	T	C	0.19798	0.00143	0.0016239	0.37856	imputed	0.999	T	C	0.037211	0.012684	0.0036839	0.00057476	imputed	0.929	N/A	N/A	N/A	N/A	N/A	N/A	t	c	5.652	1.58e-08	++++	t
1	FPG	rs2126259	8	9222556	PPP1R3B / LOC100129150	T	C	0.27295	0.0085028	0.0021315	6.63e-05	genotyped	1	T	C	0.18186	0.0036371	0.0014664	0.01313	genotyped	1	T	C	0.085955	0.0029951	0.0023655	0.20544	genotyped	1	T	C	0.029912	0.012857	0.0039595	0.0011662	imputed	0.993	N/A	N/A	N/A	N/A	N/A	N/A	t	c	5.308	1.11e-07	++++	t
1	FPG	rs1461729	8	9224652	PPP1R3B / LOC100129150	G	A	0.72766	-0.008895	0.0021312	3e-05	genotyped	1	G	A	0.8693	-0.0059195	0.0016793	0.00042366	genotyped	1	G	A	0.917953	-0.002601	0.0024227	0.28301	imputed	0.99	G	A	0.970289	-0.013026	0.0039913	0.0011004	genotyped	1	N/A	N/A	N/A	N/A	N/A	N/A	a	g	5.803	6.5e-09	++++	a
1	FPG	rs7004769	8	9225005	PPP1R3B / LOC100129150	G	A	0.65851	-0.0074775	0.0019832	0.00016291	genotyped	1	G	A	0.74605	-0.0038443	0.0012817	0.0027052	genotyped	1	G	A	0.80212	-0.0012933	0.0016238	0.42576	genotyped	1	G	A	0.962015	-0.01244	0.0036664	0.00069128	imputed	0.917	A	G	0.2057	0.003466	0.001355	0.01059	a	g	5.285	1.26e-07	++++	a
1	FPG	rs11781511	8	9229833	PPP1R3B / LOC100129150	G	A	0.71909	-0.0082335	0.002123	0.00010523	genotyped	1	G	A	0.82791	-0.0039231	0.0014905	0.0084841	genotyped	1	G	A	0.901243	-0.00156	0.0022128	0.48081	genotyped	1	G	A	0.974109	-0.010656	0.0043119	0.013463	genotyped	1	N/A	N/A	N/A	N/A	N/A	N/A	a	g	4.624	3.76e-06	++++	a
1	FPG	rs7834497	8	9261549	LOC100129150	C	T	0.974908	0.0077649	0.006001	0.19569	genotyped	1	C	T	0.81535	0.0057899	0.0014767	8.82e-05	genotyped	1	C	T	0.985198	0.013015	0.0055009	0.01798	imputed	0.933	N/A	N/A	N/A	N/A	N/A	N/A	genotyped	NA	N/A	N/A	N/A	N/A	N/A	N/A	t	c	-4.432	9.33e-06	---?	t
1	FPG	rs10955193	8	100082738	OSR2 / VPS13B	T	C	0.47866	0.0020738	0.0019262	0.28163	imputed	0.951	T	C	0.63551	0.0052347	0.0011572	6.08e-06	imputed	0.961	T	C	0.34361	0.0011563	0.0013919	0.40611	imputed	0.959	T	C	0.56255	0.0015071	0.0014064	0.28389	imputed	0.972	N/A	N/A	N/A	N/A	N/A	N/A	t	c	3.702	0.000214	++++	t
1	FPG	rs10973755	9	3833017	GLIS3	T	C	0.73623	-0.0009627	0.0021279	0.65096	genotyped	1	T	C	0.83535	-0.00050017	0.0015614	0.74871	genotyped	1	T	C	0.75311	0.00094299	0.0014915	0.52724	genotyped	1	T	C	0.53943	-0.0059891	0.0013484	8.92e-06	genotyped	0.999	N/A	N/A	N/A	N/A	N/A	N/A	t	c	-2.29	0.02205	-+--	t
1	FPG	rs1768572	9	8223044	C9orf123 / PTPRD	C	A	0.933901	-0.018003	0.0039885	6.37e-06	genotyped	0.987	C	A	0.985067	0.00097293	0.0045336	0.83008	genotyped	0.997	C	A	0.917011	0.0023511	0.0023863	0.32451	genotyped	0.999	N/A	N/A	N/A	N/A	N/A	N/A	N/A	N/A	N/A	N/A	N/A	N/A	N/A	N/A	a	c	1.499	0.134	--+?	a
1	FPG	rs10811322	9	20144688	SLC24A2 / SMNP	T	C	0.14154	0.012578	0.0027701	5.61e-06	imputed	0.972	T	C	0.38864	0.00063276	0.0011741	0.58993	imputed	0.94	T	C	0.087135	-0.002258	0.0023564	0.33793	imputed	0.973	T	C	0.355	-0.0032511	0.0014526	0.025215	imputed	0.992	N/A	N/A	N/A	N/A	N/A	N/A	t	c	0.529	0.5971	+-+-	t
1	FPG	rs1008133	9	20146963	SLC24A2 / SMNP	C	A	0.86585	-0.013672	0.0028715	1.92e-06	imputed	0.939	N/A	N/A	N/A	N/A	N/A	N/A	N/A	N/A	C	A	0.914065	0.0022055	0.0023683	0.35172	imputed	0.97	C	A	0.64612	0.0032779	0.0014612	0.024874	imputed	0.981	N/A	N/A	N/A	N/A	N/A	N/A	a	c	0.425	0.6705	?-+-	a
1	FPG	rs12778636	10	54937166	MBL2 / PCDH15	T	G	0.948425	0.021273	0.0043267	8.8e-07	imputed	0.962	T	G	0.79197	-0.00097786	0.0014361	0.49593	imputed	0.962	N/A	N/A	N/A	N/A	N/A	N/A	N/A	N/A	T	G	0.978072	0.00063983	0.00468	0.89126	imputed	0.986	N/A	N/A	N/A	N/A	N/A	N/A	t	g	2.218	0.02654	-?++	N/A
1	FPG	rs12771089	10	54937197	MBL2 / PCDH15	G	A	0.948666	0.02138	0.0043278	7.8e-07	imputed	0.967	G	A	0.79203	-0.00098183	0.0014364	0.49428	imputed	0.961	N/A	N/A	N/A	N/A	N/A	N/A	N/A	N/A	G	A	0.977499	0.00062468	0.0046482	0.89309	imputed	0.959	N/A	N/A	N/A	N/A	N/A	N/A	a	g	-2.227	0.02593	+?--	N/A
1	FPG	rs12762519	10	54938845	MBL2 / PCDH15	T	G	0.946539	0.021172	0.0042369	5.83e-07	imputed	0.97	N/A	N/A	N/A	N/A	N/A	N/A	N/A	N/A	N/A	N/A	N/A	N/A	N/A	N/A	N/A	N/A	T	G	0.978353	0.00065398	0.0046804	0.88888	genotyped	1	N/A	N/A	N/A	N/A	N/A	N/A	t	g	3.305	0.0009495	??++	N/A
1	FPG	rs11818534	10	54948615	MBL2 / PCDH15	T	C	0.944919	0.02103	0.0042482	7.41e-07	imputed	0.942	T	C	0.806	-0.00035885	0.0014892	0.80959	imputed	0.937	T	C	0.91491	-0.00088558	0.0023937	0.71141	imputed	0.992	T	C	0.977532	0.00087535	0.0047169	0.85277	imputed	0.944	N/A	N/A	N/A	N/A	N/A	N/A	t	c	1.896	0.05798	--++	t
1	FPG	rs11816676	10	54950538	MBL2 / PCDH15	T	C	0.947654	0.021074	0.004235	6.49e-07	imputed	0.994	T	C	0.80114	-0.0003491	0.0014787	0.81336	imputed	0.915	T	C	0.910947	-0.00086219	0.0023772	0.71683	imputed	0.941	T	C	0.977456	0.00093532	0.0047224	0.843	imputed	0.941	N/A	N/A	N/A	N/A	N/A	N/A	t	c	1.92	0.05488	--++	t
1	FPG	rs7090579	10	54951123	MBL2 / PCDH15	G	A	0.052462	-0.021103	0.0042355	6.28e-07	imputed	0.992	G	A	0.19588	0.00036639	0.001486	0.80525	imputed	0.926	G	A	0.090824	0.00085603	0.0023623	0.71707	imputed	0.92	G	A	0.022482	-0.00093378	0.0047223	0.84325	imputed	0.943	N/A	N/A	N/A	N/A	N/A	N/A	a	g	1.917	0.05519	--++	a
1	FPG	rs7073482	10	54951369	MBL2 / PCDH15	T	C	0.052295	-0.021098	0.0042355	6.32e-07	imputed	0.995	T	C	0.18779	0.00028305	0.0014927	0.8496	imputed	0.974	T	C	0.08981	0.00086393	0.002374	0.71592	imputed	0.932	T	C	0.022513	-0.00093645	0.0047218	0.84279	imputed	0.942	N/A	N/A	N/A	N/A	N/A	N/A	t	c	-1.944	0.05186	++--	t
1	FPG	rs7072768	10	54951645	MBL2 / PCDH15	G	A	0.947666	0.021101	0.0042357	6.3e-07	imputed	0.994	G	A	0.81131	6.43e-06	0.001479	0.99653	imputed	0.989	G	A	0.909103	-0.00085501	0.0023619	0.71735	imputed	0.919	G	A	0.977578	0.00092954	0.0047224	0.84396	imputed	0.946	N/A	N/A	N/A	N/A	N/A	N/A	a	g	-2.04	0.04132	-+--	a
1	FPG	rs7073891	10	54951664	MBL2 / PCDH15	T	C	0.053027	-0.021366	0.0042463	4.86e-07	imputed	0.98	T	C	0.18727	0.00019951	0.0014918	0.89361	imputed	0.981	T	C	0.085979	0.0009	0.0023931	0.70685	imputed	0.98	N/A	N/A	N/A	N/A	N/A	N/A	N/A	N/A	N/A	N/A	N/A	N/A	N/A	N/A	t	c	-2.199	0.02788	++-?	t
1	FPG	rs7082398	10	54952876	MBL2 / PCDH15	T	C	0.053244	-0.021247	0.0042499	5.75e-07	imputed	0.977	T	C	0.18721	0.00023691	0.0014901	0.87368	imputed	0.979	T	C	0.085767	0.00091814	0.0023967	0.70166	imputed	0.983	T	C	0.022017	-0.00091236	0.0047171	0.84663	imputed	0.963	N/A	N/A	N/A	N/A	N/A	N/A	t	c	-1.954	0.0507	++--	t
1	FPG	rs7069859	10	54953089	MBL2 / PCDH15	T	C	0.945825	0.019838	0.004205	2.38e-06	imputed	0.983	T	C	0.81343	-0.00019101	0.0014863	0.89774	imputed	0.985	T	C	0.915161	-0.00088843	0.0023928	0.71042	imputed	0.995	T	C	0.97859	0.00088998	0.0047228	0.85053	imputed	0.991	N/A	N/A	N/A	N/A	N/A	N/A	t	c	1.852	0.064	--++	t
1	FPG	rs7070023	10	54953192	MBL2 / PCDH15	T	A	0.946259	0.019752	0.0042	2.56e-06	imputed	0.991	T	A	0.813	-0.00013239	0.0014848	0.92895	imputed	0.986	T	A	0.915221	-0.00089532	0.0023928	0.70828	imputed	0.996	T	A	0.977902	0.00093531	0.0047237	0.84304	imputed	0.96	N/A	N/A	N/A	N/A	N/A	N/A	a	t	-1.869	0.06169	++--	a
1	FPG	rs7081932	10	54953263	MBL2 / PCDH15	G	C	0.946465	0.019721	0.004198	2.63e-06	imputed	0.995	G	C	0.81369	-0.00020667	0.0014862	0.88941	imputed	0.986	G	C	0.915494	-0.00089356	0.002392	0.70873	imputed	1	G	C	0.978713	0.00087518	0.0047232	0.853	imputed	0.997	N/A	N/A	N/A	N/A	N/A	N/A	c	g	-1.835	0.06644	++--	c
1	FPG	rs7083591	10	54953702	MBL2 / PCDH15	T	C	0.052451	-0.021173	0.0042379	5.85e-07	imputed	0.992	T	C	0.18786	2.86e-05	0.0014791	0.98456	imputed	0.991	T	C	0.085046	0.00089186	0.002394	0.7095	imputed	0.993	T	C	0.021535	-0.00087321	0.0047224	0.8533	imputed	0.985	N/A	N/A	N/A	N/A	N/A	N/A	t	c	-2.023	0.04309	++--	t
1	FPG	rs7087312	10	54953953	MBL2 / PCDH15	G	C	0.052569	-0.021221	0.0042427	5.68e-07	imputed	0.99	G	C	0.18786	2.8e-05	0.0014791	0.98491	imputed	0.991	G	C	0.084895	0.00089808	0.002393	0.70745	imputed	0.995	G	C	0.021556	-0.00090377	0.0047222	0.84822	imputed	0.984	N/A	N/A	N/A	N/A	N/A	N/A	c	g	2.027	0.04263	--++	c
1	FPG	rs7070911	10	54954010	MBL2 / PCDH15	G	A	0.052707	-0.021252	0.0042401	5.38e-07	imputed	0.987	G	A	0.18787	2.76e-05	0.0014791	0.9851	imputed	0.991	G	A	0.0847	0.00089406	0.0023926	0.70865	imputed	0.997	G	A	0.022	-0.00091063	0.0047193	0.84699	imputed	0.964	N/A	N/A	N/A	N/A	N/A	N/A	a	g	2.034	0.04199	--++	a
1	FPG	rs7086598	10	54954225	MBL2 / PCDH15	G	C	0.94215	0.019744	0.0042159	2.82e-06	imputed	0.917	G	C	0.80632	-7.58e-05	0.0014847	0.9593	imputed	0.953	N/A	N/A	N/A	N/A	N/A	N/A	N/A	N/A	N/A	N/A	N/A	N/A	N/A	N/A	N/A	N/A	N/A	N/A	N/A	N/A	N/A	N/A	c	g	-3.039	0.002373	+?-?	N/A
1	FPG	rs12772777	10	54958580	MBL2 / PCDH15	G	A	0.05459	-0.019754	0.0041642	2.1e-06	imputed	0.99	G	A	0.18861	-0.00010234	0.0014783	0.94481	imputed	0.993	G	A	0.084604	0.0008791	0.0023919	0.71322	imputed	0.998	G	A	0.021369	-0.00086994	0.0047216	0.85382	imputed	0.993	N/A	N/A	N/A	N/A	N/A	N/A	a	g	1.961	0.04993	+-++	a
1	FPG	rs11812644	10	54961906	MBL2 / PCDH15	T	C	0.945857	0.019727	0.0041781	2.34e-06	imputed	0.979	T	C	0.8114	9.55e-05	0.0014784	0.94848	imputed	0.992	T	C	0.915185	-0.00089007	0.0023929	0.70992	imputed	0.996	T	C	0.978673	0.00086179	0.0047215	0.85517	imputed	0.995	N/A	N/A	N/A	N/A	N/A	N/A	t	c	1.945	0.05172	+-++	t
1	FPG	rs11817911	10	54961918	MBL2 / PCDH15	C	A	0.945432	0.019754	0.0041753	2.23e-06	imputed	0.976	C	A	0.8114	9.55e-05	0.0014784	0.94848	imputed	0.992	C	A	0.915118	-0.00090627	0.0023932	0.70492	imputed	0.995	C	A	0.978693	0.0008595	0.0047215	0.85555	imputed	0.996	N/A	N/A	N/A	N/A	N/A	N/A	a	c	-1.946	0.05171	-+--	a
1	FPG	rs11812259	10	54962063	MBL2 / PCDH15	G	A	0.054355	-0.019741	0.0041771	2.29e-06	imputed	0.977	G	A	0.18856	-9.26e-05	0.0014784	0.95008	imputed	0.992	G	A	0.084792	0.00089503	0.0023927	0.70835	imputed	0.996	G	A	0.021542	-0.00087861	0.0047218	0.85239	imputed	0.985	N/A	N/A	N/A	N/A	N/A	N/A	a	g	1.947	0.05153	+-++	a
1	FPG	rs7084403	10	54962387	MBL2 / PCDH15	C	A	0.054673	-0.019767	0.0041743	2.19e-06	imputed	0.977	C	A	0.18855	-9.24e-05	0.0014784	0.95018	imputed	0.992	C	A	0.085144	0.0008862	0.0023937	0.71121	imputed	0.991	C	A	0.021583	-0.00089977	0.0047178	0.84875	imputed	0.983	N/A	N/A	N/A	N/A	N/A	N/A	a	c	1.955	0.05053	+-++	a
1	FPG	rs7101007	10	54962570	MBL2 / PCDH15	T	C	0.054471	-0.019737	0.0041574	2.06e-06	genotyped	1	T	C	0.19101	-0.00011794	0.0014841	0.93666	genotyped	0.976	T	C	0.085944	0.00093997	0.0023957	0.69479	imputed	0.981	T	C	0.022497	0.0003613	0.0043567	0.93391	genotyped	1	N/A	N/A	N/A	N/A	N/A	N/A	t	c	-1.816	0.06941	-+-+	t
1	FPG	rs7101019	10	54962600	MBL2 / PCDH15	T	C	0.054287	-0.019749	0.0041736	2.22e-06	imputed	0.986	T	C	0.18855	-0.00010427	0.0014785	0.94378	imputed	0.993	T	C	0.084852	0.00089081	0.0023929	0.70969	imputed	0.995	T	C	0.021496	-0.00087462	0.0047211	0.85303	imputed	0.987	N/A	N/A	N/A	N/A	N/A	N/A	t	c	-1.954	0.0507	-+--	t
1	FPG	rs7100164	10	54962677	MBL2 / PCDH15	T	G	0.054619	-0.019783	0.004176	2.17e-06	imputed	0.979	T	G	0.18853	-0.00010386	0.0014784	0.94399	imputed	0.993	T	G	0.087288	0.00086004	0.0023958	0.71961	imputed	0.963	T	G	0.02156	-0.00093577	0.0047178	0.84277	imputed	0.984	N/A	N/A	N/A	N/A	N/A	N/A	t	g	-1.97	0.0488	-+--	t
1	FPG	rs7084882	10	54962731	MBL2 / PCDH15	T	A	0.054821	-0.019746	0.0041592	2.06e-06	imputed	0.99	T	A	0.18861	-9.63e-05	0.0014791	0.94808	imputed	0.993	T	A	0.08464	0.00089159	0.0023924	0.70939	imputed	0.998	T	A	0.022304	-0.00075258	0.0047486	0.87408	imputed	0.951	N/A	N/A	N/A	N/A	N/A	N/A	a	t	1.944	0.05189	+-++	a
1	FPG	rs7919179	10	54968476	MBL2 / PCDH15	C	A	0.93925	0.018839	0.0039577	1.94e-06	imputed	0.987	C	A	0.7966	0.00032792	0.0014476	0.8208	imputed	0.969	C	A	0.914493	-0.00092218	0.0023964	0.70037	imputed	0.985	C	A	0.976892	-0.00018306	0.0046208	0.9684	imputed	0.962	N/A	N/A	N/A	N/A	N/A	N/A	a	c	-1.92	0.05485	-+-+	a
1	FPG	rs11196106	10	114532689	VTI1A	T	C	0.847	-0.003772	0.0026036	0.14741	genotyped	1	T	C	0.73209	0.00045158	0.0012685	0.72184	genotyped	1	T	C	0.942708	-0.01316	0.0029309	7.12e-06	imputed	0.923	T	C	0.76188	0.0013105	0.0016318	0.4219	genotyped	1	N/A	N/A	N/A	N/A	N/A	N/A	t	c	-2.525	0.01157	+--+	t
1	FPG	rs3847554	11	92308474	LOC100128354	T	C	0.34333	0.0056076	0.0019301	0.0036689	genotyped	1	T	C	0.89535	-0.00028971	0.0018278	0.87406	genotyped	1	T	C	0.41671	0.0058382	0.0013325	1.18e-05	genotyped	0.999	T	C	0.5775	0.0057028	0.001419	5.85e-05	genotyped	0.999	T	C	0.4393	0.001606	0.001145	0.1611	t	c	5.671	1.42e-08	-+++	t
1	FPG	rs1387153	11	92313476	LOC100128354 / MTNR1B	T	C	0.24051	0.0066738	0.002174	0.002142	genotyped	1	T	C	0.33907	0.00052457	0.001198	0.66148	genotyped	1	T	C	0.30285	0.0061474	0.0014009	1.14e-05	genotyped	1	T	C	0.43591	0.0032577	0.0013878	0.018909	genotyped	1	T	C	0.3123	0.00441	0.001199	0.00024	t	c	5.178	2.24e-07	++++	t
1	FPG	rs11523890	11	92319426	LOC100128354 / MTNR1B	T	C	0.27784	0.0064822	0.0020799	0.0018295	imputed	0.987	T	C	0.36967	8.47e-05	0.001188	0.94313	imputed	0.961	T	C	0.33725	0.0069873	0.0014182	8.36e-07	imputed	0.902	T	C	0.43731	0.0033913	0.0013929	0.014907	imputed	0.992	N/A	N/A	N/A	N/A	N/A	N/A	t	c	5.362	8.25e-08	++++	t
1	FPG	rs10830956	11	92320661	LOC100128354 / MTNR1B	T	C	0.24164	0.0066672	0.0021765	0.0021895	imputed	0.997	T	C	0.34516	0.00041082	0.0012123	0.7347	imputed	0.957	T	C	0.31074	0.006488	0.0014173	4.7e-06	imputed	0.964	T	C	0.43505	0.0033957	0.0013974	0.015095	imputed	0.986	N/A	N/A	N/A	N/A	N/A	N/A	t	c	5.274	1.33e-07	++++	t
1	FPG	rs7933855	11	92323970	LOC100128354 / MTNR1B	G	A	0.66029	-0.0058753	0.0019647	0.0027851	imputed	0.993	N/A	N/A	N/A	N/A	N/A	N/A	N/A	N/A	G	A	0.59592	-0.0065809	0.0013361	8.42e-07	imputed	0.982	G	A	0.54515	-0.0035908	0.0014036	0.010522	imputed	0.981	N/A	N/A	N/A	N/A	N/A	N/A	a	g	6.129	8.83e-10	?+++	a
1	FPG	rs7936247	11	92329680	LOC100128354 / MTNR1B	T	G	0.27791	0.0065232	0.0020763	0.0016796	imputed	0.99	T	G	0.36983	8.59e-05	0.0011896	0.94245	imputed	0.958	T	G	0.33756	0.0070495	0.0014164	6.45e-07	imputed	0.903	T	G	0.43635	0.003559	0.0013946	0.010708	imputed	0.995	T	G	0.3605	0.003412	0.001166	0.003452	t	g	5.461	4.73e-08	++++	t
1	FPG	rs2166706	11	92331180	LOC100128354 / MTNR1B	T	C	0.67625	-0.0049651	0.0019896	0.012576	genotyped	1	T	C	0.34419	0.0015792	0.0012161	0.1941	genotyped	1	T	C	0.60973	-0.0061766	0.0013241	3.09e-06	genotyped	1	T	C	0.55053	-0.0035696	0.001391	0.010281	genotyped	1	N/A	N/A	N/A	N/A	N/A	N/A	t	c	-4.343	1.4e-05	+---	t
1	FPG	rs10830963	11	92348358	MTNR1B	G	C	0.24038	0.0094494	0.0022042	1.81e-05	genotyped	0.999	N/A	N/A	N/A	N/A	N/A	N/A	genotyped	NA	N/A	N/A	N/A	N/A	N/A	N/A	N/A	N/A	G	C	0.42317	0.0062915	0.0014156	8.82e-06	genotyped	1	N/A	N/A	N/A	N/A	N/A	N/A	c	g	-6.159	7.34e-10	??--	N/A
1	FPG	rs1597023	11	92360967	MTNR1B / SLC36A4	G	A	0.25887	-0.002805	0.002167	0.19552	genotyped	1	G	A	0.42884	0.0002569	0.001141	0.82187	genotyped	1	G	A	0.49268	-0.0054266	0.0012832	2.35e-05	genotyped	1	G	A	0.26634	-0.0025708	0.001584	0.10459	imputed	0.928	G	A	0.4699	-0.004343	0.001106	8.9e-05	a	g	3.628	0.0002853	-+++	a
1	FPG	rs11225514	11	102382723	MMP13 / DCUN1D5	G	A	0.10159	0.0074763	0.0031749	0.018532	genotyped	1	G	A	0.24234	0.0025921	0.0013175	0.049135	genotyped	1	N/A	N/A	N/A	N/A	N/A	N/A	N/A	N/A	G	A	0.19822	0.0059949	0.0017251	0.00051065	genotyped	1	N/A	N/A	N/A	N/A	N/A	N/A	a	g	-4.532	5.85e-06	-?--	N/A
1	FPG	rs10880987	12	45378108	OR7A19P / SLC38A4	G	A	0.41552	-0.0031719	0.0019652	0.10652	imputed	0.967	G	A	0.17083	-0.0022565	0.0015166	0.13679	imputed	0.929	G	A	0.47599	-0.0036898	0.0012984	0.0044862	imputed	0.975	G	A	0.40596	-0.0039983	0.0014286	0.0051299	imputed	0.981	N/A	N/A	N/A	N/A	N/A	N/A	a	g	4.444	8.81e-06	++++	a
1	FPG	rs4140782	12	45405111	OR7A19P / SLC38A4	T	C	0.40145	-0.0026725	0.0019416	0.16869	imputed	0.986	T	C	0.22131	-0.0018158	0.0013252	0.1706	imputed	0.996	T	C	0.41622	-0.0044263	0.0013283	0.00086157	imputed	0.999	T	C	0.41882	-0.0038574	0.0014126	0.0063217	imputed	0.979	N/A	N/A	N/A	N/A	N/A	N/A	t	c	-4.522	6.14e-06	----	t
1	FPG	rs10880996	12	45406087	OR7A19P / SLC38A4	G	C	0.58993	0.0028127	0.0019643	0.15217	imputed	0.951	N/A	N/A	N/A	N/A	N/A	N/A	N/A	N/A	G	C	0.58338	0.0044295	0.0013291	0.00085974	imputed	0.997	G	C	0.57065	0.0038373	0.0014218	0.006956	imputed	0.968	N/A	N/A	N/A	N/A	N/A	N/A	c	g	-4.429	9.48e-06	?---	c
1	FPG	rs12426014	12	45431708	OR7A19P / SLC38A4	C	A	0.3894	-0.0030004	0.0019992	0.1334	imputed	0.914	C	A	0.15837	-0.0018226	0.0015314	0.23399	imputed	0.942	C	A	0.38819	-0.0047226	0.0013798	0.00061996	imputed	0.936	C	A	0.40727	-0.0037008	0.0014305	0.0096806	imputed	0.965	N/A	N/A	N/A	N/A	N/A	N/A	a	c	4.463	8.1e-06	++++	a
1	FPG	rs17258240	14	84183319	LOC730105 / RNU3P3	T	C	0.32345	0.0091351	0.0020574	8.99e-06	imputed	0.952	N/A	N/A	N/A	N/A	N/A	N/A	N/A	N/A	T	C	0.30298	-0.0017985	0.0014484	0.21434	imputed	0.966	T	C	0.36875	-0.0034383	0.0014707	0.019392	imputed	0.942	N/A	N/A	N/A	N/A	N/A	N/A	t	c	0.013	0.9896	?-+-	t
1	FPG	rs4301956	14	84199478	LOC730105 / RNU3P3	T	G	0.70761	0.010058	0.0020927	1.54e-06	imputed	0.994	T	G	0.76638	-0.0016021	0.0013733	0.24337	imputed	0.961	T	G	0.55143	-0.0017264	0.0012905	0.18098	imputed	0.991	T	G	0.68814	-0.0020833	0.0014714	0.15683	imputed	0.989	N/A	N/A	N/A	N/A	N/A	N/A	t	g	0.016	0.987	--+-	t
1	FPG	rs1564522	14	84205251	LOC730105 / RNU3P3	T	G	0.2913	-0.010104	0.0020971	1.45e-06	imputed	0.992	T	G	0.23189	0.0016072	0.0013798	0.2441	imputed	0.957	T	G	0.4468	0.0017234	0.001295	0.18326	imputed	0.984	T	G	0.31027	0.0023617	0.001475	0.10934	genotyped	1	N/A	N/A	N/A	N/A	N/A	N/A	t	g	0.069	0.9446	++-+	t
1	FPG	rs2623144	14	84210005	LOC730105 / RNU3P3	G	A	0.2907	-0.010077	0.0020922	1.46e-06	genotyped	1	G	A	0.22837	0.0014965	0.0013555	0.2696	genotyped	1	G	A	0.4477	0.0017531	0.0012847	0.17237	genotyped	1	G	A	0.31137	0.0022166	0.0014855	0.13566	imputed	0.968	N/A	N/A	N/A	N/A	N/A	N/A	a	g	-0.003	0.9976	--+-	a
1	FPG	rs3745640	19	5734905	MGC24975	G	A	0.78354	-0.0025321	0.0022405	0.25842	imputed	0.991	G	A	0.6605	-0.0024415	0.0012151	0.044507	imputed	0.967	G	A	0.84484	-0.0060776	0.0018445	0.00098406	imputed	0.978	G	A	0.45071	-0.0030201	0.0013696	0.027443	imputed	0.997	N/A	N/A	N/A	N/A	N/A	N/A	a	g	4.439	9.03e-06	++++	a
1	FPG	rs265558	19	17755878	FCHO1	T	C	0.18482	-0.0029147	0.0024171	0.22786	genotyped	1	T	C	0.16417	-0.0066795	0.0014992	8.38e-06	genotyped	1	T	C	0.372	0.00062059	0.0013651	0.64939	genotyped	1	T	C	0.032253	-0.0010617	0.0038498	0.78271	genotyped	1	N/A	N/A	N/A	N/A	N/A	N/A	t	c	-2.6	0.009317	-+--	t
1	FPG	rs3746750	20	61069344	C20orf59	G	A	0.64076	-0.0025364	0.0019983	0.20434	genotyped	1	G	A	0.36791	0.00054227	0.0011755	0.64458	genotyped	1	G	A	0.61412	-0.0067751	0.0013867	1.03e-06	genotyped	1	G	A	0.72627	-0.0022232	0.0015888	0.16173	imputed	0.951	A	G	0.3897	0.001362	0.001147	0.235	a	g	3.75	0.0001765	-+++	a
1	FPG	rs1047126	20	61069919	C20orf59	T	C	0.601	-0.0013381	0.0019504	0.49267	genotyped	1	T	C	0.3545	0.00020701	0.0011869	0.86155	genotyped	0.996	T	C	0.52926	-0.0059256	0.0013369	9.32e-06	genotyped	1	T	C	0.72039	-0.0024606	0.0015763	0.11851	imputed	0.958	N/A	N/A	N/A	N/A	N/A	N/A	t	c	-3.473	0.0005145	+---	t
1	FPG	rs5754319	22	31600348	SYN3	C	A	0.79061	-0.0033206	0.0022918	0.14736	imputed	0.999	C	A	0.901244	-0.0085682	0.0018999	6.48e-06	imputed	0.978	C	A	0.7853	-0.00089281	0.0016187	0.58125	imputed	0.996	C	A	0.940253	-0.0034331	0.0029125	0.23851	imputed	0.994	N/A	N/A	N/A	N/A	N/A	N/A	a	c	3.755	0.0001733	++++	a
1	FPG	rs5754321	22	31600461	SYN3	T	C	0.78951	-0.003287	0.0022954	0.15215	imputed	0.993	T	C	0.901724	-0.0085312	0.0018955	6.77e-06	imputed	0.984	T	C	0.78221	-0.00067747	0.0016186	0.67554	imputed	0.98	T	C	0.938328	-0.0034552	0.002928	0.23799	imputed	0.962	N/A	N/A	N/A	N/A	N/A	N/A	t	c	-3.67	0.0002424	----	t
1	FPG	rs5754322	22	31602699	SYN3	T	C	0.7907	-0.0033247	0.0022913	0.14678	genotyped	1	T	C	0.903256	-0.0084427	0.0018947	8.35e-06	genotyped	1	T	C	0.78566	-0.00087886	0.0016168	0.58673	genotyped	1	T	C	0.940577	-0.0034177	0.0029103	0.24025	genotyped	1	N/A	N/A	N/A	N/A	N/A	N/A	t	c	-3.723	0.0001971	----	t
2	1HPG	rs10181739	2	85775063	GNLY	N/A	N/A	N/A	N/A	N/A	N/A	genotyped	NA	G	A	0.916764	0.22462	0.04979	6.44e-06	genotyped	1	N/A	N/A	N/A	N/A	N/A	N/A	N/A	N/A	N/A	N/A	N/A	N/A	N/A	N/A	N/A	N/A	N/A	N/A	N/A	N/A	N/A	N/A	a	g	-4.511	6.44e-06	-???	N/A
2	1HPG	rs13413829	2	85783719	GNLY / ATOH8	N/A	N/A	N/A	N/A	N/A	N/A	N/A	N/A	G	A	0.91718	0.22542	0.050023	6.59e-06	imputed	0.99	N/A	N/A	N/A	N/A	N/A	N/A	N/A	N/A	N/A	N/A	N/A	N/A	N/A	N/A	N/A	N/A	N/A	N/A	N/A	N/A	N/A	N/A	a	g	-4.506	6.59e-06	-???	N/A
2	1HPG	rs13383848	2	85786128	GNLY / ATOH8	N/A	N/A	N/A	N/A	N/A	N/A	N/A	N/A	T	C	0.914684	0.22499	0.049097	4.59e-06	imputed	0.991	N/A	N/A	N/A	N/A	N/A	N/A	N/A	N/A	N/A	N/A	N/A	N/A	N/A	N/A	N/A	N/A	N/A	N/A	N/A	N/A	N/A	N/A	t	c	4.583	4.59e-06	+???	N/A
2	1HPG	rs13422837	2	85788106	GNLY / ATOH8	N/A	N/A	N/A	N/A	N/A	N/A	N/A	N/A	T	C	0.914936	0.22622	0.04928	4.42e-06	imputed	0.988	N/A	N/A	N/A	N/A	N/A	N/A	N/A	N/A	N/A	N/A	N/A	N/A	N/A	N/A	genotyped	NA	N/A	N/A	N/A	N/A	N/A	N/A	t	c	4.59	4.42e-06	+???	N/A
2	1HPG	rs7592198	2	124595577	CNTNAP5	T	C	0.40698	0.04184	0.068985	0.54417	genotyped	1	T	C	0.67674	0.016667	0.029532	0.5725	genotyped	1	T	C	0.54638	-0.21632	0.048704	8.93e-06	imputed	0.975	T	C	0.58447	0.037947	0.050921	0.45614	genotyped	1	C	T	0.468	-0.01781	0.03928	0.6504	t	c	-1.543	0.1228	+-++	t
2	1HPG	rs3769185	2	173721745	ZAK	G	A	0.57222	0.082386	0.067335	0.22113	genotyped	1	G	A	0.14047	0.17478	0.039053	7.63e-06	genotyped	1	G	A	0.51317	0.062775	0.048269	0.19342	genotyped	1	G	A	0.42105	-0.012349	0.049569	0.80326	genotyped	1	N/A	N/A	N/A	N/A	N/A	N/A	a	g	-3.321	0.0008956	---+	a
2	1HPG	rs3769184	2	173728166	ZAK	G	A	0.62179	0.068651	0.069817	0.32547	genotyped	1	G	A	0.17442	0.1735	0.036826	2.46e-06	genotyped	1	G	A	0.59583	0.090525	0.048916	0.064223	genotyped	1	G	A	0.42992	-0.013713	0.050966	0.78789	imputed	0.942	N/A	N/A	N/A	N/A	N/A	N/A	a	g	-3.629	0.000284	---+	a
2	1HPG	rs1837470	2	173756617	ZAK	G	A	0.48715	0.10121	0.067879	0.13594	genotyped	1	G	A	0.16651	0.17991	0.037817	1.96e-06	genotyped	1	G	A	0.57376	0.10216	0.049045	0.037252	imputed	0.989	G	A	0.42402	-0.0031335	0.049604	0.94963	genotyped	1	N/A	N/A	N/A	N/A	N/A	N/A	a	g	-4.105	4.04e-05	---+	a
2	1HPG	rs7590028	2	180257688	ZNF385B	G	A	0.46022	0.030237	0.065066	0.64214	genotyped	1	G	A	0.51349	0.12117	0.026678	5.58e-06	genotyped	1	G	A	0.53038	0.0022001	0.047243	0.96286	genotyped	1	G	A	0.66171	-0.052188	0.052309	0.31843	genotyped	1	N/A	N/A	N/A	N/A	N/A	N/A	a	g	-1.947	0.05156	---+	a
2	1HPG	rs932115	2	180258731	ZNF385B	C	A	0.46393	0.025146	0.066292	0.70445	imputed	0.97	C	A	0.5196	0.12333	0.027198	5.77e-06	imputed	0.966	C	A	0.5271	0.0050737	0.048571	0.91681	imputed	0.946	C	A	0.6612	-0.051933	0.052533	0.32287	imputed	0.988	N/A	N/A	N/A	N/A	N/A	N/A	a	c	-1.943	0.05196	---+	a
2	1HPG	rs1515289	2	180259909	ZNF385B	T	C	0.50708	-0.030421	0.065379	0.64171	imputed	0.994	T	C	0.4445	-0.12349	0.027689	8.2e-06	imputed	0.955	T	C	0.44022	-0.014441	0.049289	0.76954	imputed	0.9	T	C	0.33433	0.049755	0.052207	0.34057	imputed	0.997	N/A	N/A	N/A	N/A	N/A	N/A	t	c	-2.066	0.03879	---+	t
2	1HPG	rs4327185	2	211472829	CPS1 / ERBB4	T	C	0.74359	-0.20023	0.076713	0.0090513	imputed	0.993	T	C	0.64385	-0.067183	0.029285	0.021784	imputed	0.945	T	C	0.86654	-0.12766	0.070793	0.071353	imputed	0.973	T	C	0.42935	-0.1413	0.050079	0.0047804	imputed	0.986	N/A	N/A	N/A	N/A	N/A	N/A	t	c	-4.704	2.55e-06	----	t
2	1HPG	rs4362497	2	211480823	CPS1 / ERBB4	T	A	0.25558	0.20068	0.076714	0.0088987	imputed	0.998	T	A	0.34591	0.064122	0.029239	0.028308	imputed	0.957	T	A	0.13141	0.12666	0.070595	0.072789	imputed	0.991	T	A	0.56237	0.14698	0.051011	0.0039609	imputed	0.943	N/A	N/A	N/A	N/A	N/A	N/A	a	t	-4.682	2.84e-06	----	a
2	1HPG	rs7420853	2	211486446	CPS1 / ERBB4	G	A	0.26198	0.21127	0.076452	0.0057209	imputed	0.999	G	A	0.33333	0.053593	0.029412	0.068437	imputed	0.998	G	A	0.13308	0.12949	0.070007	0.064361	imputed	0.997	G	A	0.58088	0.13586	0.0496	0.00616	imputed	0.998	N/A	N/A	N/A	N/A	N/A	N/A	a	g	-4.521	6.16e-06	----	a
2	1HPG	rs4505460	2	211486517	CPS1 / ERBB4	C	A	0.26193	0.21116	0.076439	0.0057372	genotyped	1	C	A	0.33337	0.053427	0.029385	0.069034	genotyped	0.999	C	A	0.1357	0.11626	0.068704	0.09061	genotyped	1	C	A	0.58107	0.13668	0.049511	0.0057713	genotyped	1	N/A	N/A	N/A	N/A	N/A	N/A	a	c	-4.442	8.91e-06	----	a
2	1HPG	rs4438425	2	211489454	CPS1 / ERBB4	T	C	0.73882	-0.21134	0.07677	0.0059075	imputed	0.991	T	C	0.69555	-0.062828	0.030942	0.042308	imputed	0.913	T	C	0.86786	-0.13234	0.070245	0.059559	imputed	0.995	T	C	0.43241	-0.14338	0.05022	0.0043032	imputed	0.972	N/A	N/A	N/A	N/A	N/A	N/A	t	c	-4.698	2.63e-06	----	t
2	1HPG	rs4635463	2	211489483	CPS1 / ERBB4	T	C	0.73853	-0.21143	0.076812	0.0059122	imputed	0.989	T	C	0.69985	-0.062244	0.030953	0.044333	imputed	0.93	T	C	0.86798	-0.13245	0.070287	0.059515	imputed	0.995	T	C	0.4347	-0.14371	0.05041	0.0043601	imputed	0.964	N/A	N/A	N/A	N/A	N/A	N/A	t	c	-4.686	2.79e-06	----	t
2	1HPG	rs4505461	2	211489514	CPS1 / ERBB4	G	C	0.25124	0.21821	0.077386	0.0048054	imputed	0.998	G	C	0.28843	0.057869	0.030857	0.060735	imputed	0.976	G	C	0.1307	0.12907	0.070537	0.067274	imputed	0.999	G	C	0.56279	0.14598	0.050242	0.0036656	imputed	0.973	N/A	N/A	N/A	N/A	N/A	N/A	c	g	-4.646	3.39e-06	----	c
2	1HPG	rs7566803	2	211490919	CPS1 / ERBB4	G	A	0.25124	0.21823	0.07739	0.0048048	imputed	0.998	G	A	0.28812	0.058287	0.030827	0.058657	imputed	0.979	G	A	0.13056	0.13052	0.070879	0.065546	imputed	0.992	G	A	0.56291	0.14507	0.050237	0.0038804	imputed	0.974	N/A	N/A	N/A	N/A	N/A	N/A	a	g	-4.651	3.31e-06	----	a
2	1HPG	rs7580725	2	211490944	CPS1 / ERBB4	T	C	0.25153	0.2096	0.077119	0.0065698	genotyped	1	T	C	0.28419	0.056339	0.030677	0.066277	genotyped	1	T	C	0.12582	0.13975	0.071741	0.051412	genotyped	1	T	C	0.55937	0.14546	0.05055	0.0040078	imputed	0.96	N/A	N/A	N/A	N/A	N/A	N/A	t	c	4.634	3.58e-06	++++	t
2	1HPG	rs4611592	2	211494924	CPS1 / ERBB4	G	A	0.25598	0.21268	0.077658	0.0061687	imputed	0.98	G	A	0.29082	0.065314	0.031139	0.03595	imputed	0.942	G	A	0.12558	0.13778	0.071831	0.055103	imputed	0.995	G	A	0.56632	0.14204	0.049991	0.0044938	imputed	0.986	N/A	N/A	N/A	N/A	N/A	N/A	a	g	-4.736	2.18e-06	----	a
2	1HPG	rs4425028	2	211507983	CPS1 / ERBB4	G	A	0.74955	-0.22601	0.079115	0.0042796	imputed	0.961	G	A	0.70559	-0.062635	0.030935	0.042895	imputed	0.961	G	A	0.87047	-0.1144	0.070319	0.10376	imputed	0.996	G	A	0.43131	-0.13316	0.050168	0.0079476	imputed	0.983	N/A	N/A	N/A	N/A	N/A	N/A	a	g	4.493	7.02e-06	++++	a
2	1HPG	rs4580326	2	211513096	CPS1 / ERBB4	T	C	0.7505	-0.22995	0.079584	0.0038601	imputed	0.949	T	C	0.70263	-0.063954	0.030964	0.038885	imputed	0.95	T	C	0.86211	-0.11991	0.06895	0.082027	imputed	0.966	T	C	0.431	-0.13133	0.050326	0.0090636	imputed	0.975	N/A	N/A	N/A	N/A	N/A	N/A	t	c	-4.566	4.96e-06	----	t
2	1HPG	rs13006521	2	211521377	CPS1 / ERBB4	G	A	0.74725	-0.23353	0.077371	0.0025422	genotyped	1	G	A	0.70605	-0.065456	0.03044	0.031528	genotyped	1	G	A	0.86979	-0.11973	0.070127	0.087758	genotyped	1	G	A	0.42784	-0.12225	0.049785	0.014067	genotyped	1	N/A	N/A	N/A	N/A	N/A	N/A	a	g	4.567	4.96e-06	++++	a
2	1HPG	rs809949	2	211538441	CPS1 / ERBB4	T	C	0.18633	0.29651	0.087089	0.0006625	imputed	0.981	T	C	0.269	0.073814	0.032109	0.021514	imputed	0.936	T	C	0.02329	0.20611	0.15781	0.19154	imputed	0.974	T	C	0.55224	0.11401	0.0511	0.025672	imputed	0.934	N/A	N/A	N/A	N/A	N/A	N/A	t	c	4.467	7.93e-06	++++	t
2	1HPG	rs2687194	3	60392170	FHIT	G	C	0.49266	-0.2328	0.068928	0.00073181	imputed	0.922	N/A	N/A	N/A	N/A	N/A	N/A	N/A	N/A	N/A	N/A	N/A	N/A	N/A	N/A	N/A	N/A	G	C	0.50015	-0.16043	0.049379	0.0011585	imputed	0.97	N/A	N/A	N/A	N/A	N/A	N/A	c	g	4.658	3.2e-06	??++	N/A
2	1HPG	rs1112766	3	136357395	EPHB1	G	A	0.86365	-0.045941	0.094318	0.6262	imputed	0.996	G	A	0.943068	0.0428	0.061293	0.48499	imputed	0.989	G	A	0.74216	0.23522	0.053082	9.37e-06	imputed	0.996	G	A	0.984295	0.0083086	0.20225	0.96723	genotyped	1	N/A	N/A	N/A	N/A	N/A	N/A	a	g	-2.616	0.008909	--+-	a
2	1HPG	rs13117227	4	163274178	FSTL5	T	A	0.12723	-0.010189	0.1013	0.91988	imputed	0.941	N/A	N/A	N/A	N/A	N/A	N/A	N/A	N/A	N/A	N/A	N/A	N/A	N/A	N/A	N/A	N/A	T	A	0.090064	-0.39884	0.089324	8e-06	imputed	0.961	N/A	N/A	N/A	N/A	N/A	N/A	a	t	3.495	0.0004732	??++	N/A
2	1HPG	rs13109373	4	163279949	FSTL5	G	A	0.8672	0.010881	0.096693	0.9104	genotyped	1	G	A	0.78326	-0.063205	0.033424	0.058622	genotyped	1	G	A	0.85625	0.092147	0.0677	0.17348	genotyped	1	G	A	0.907898	0.38443	0.086705	9.26e-06	genotyped	1	N/A	N/A	N/A	N/A	N/A	N/A	a	g	-2.158	0.03096	+---	a
2	1HPG	rs1606234	4	189533026	LOC152663 / LOC644491	G	A	0.49633	-0.0029391	0.068437	0.96574	genotyped	1	G	A	0.4907	0.1215	0.027426	9.42e-06	genotyped	1	G	A	0.5926	-0.0080034	0.048458	0.86882	genotyped	1	G	A	0.57895	0.071111	0.050597	0.15989	genotyped	1	N/A	N/A	N/A	N/A	N/A	N/A	a	g	-2.795	0.005196	-++-	a
2	1HPG	rs10068942	5	7579847	ADCY2	T	C	0.38248	0.30428	0.068647	9.31e-06	imputed	0.98	N/A	N/A	N/A	N/A	N/A	N/A	N/A	N/A	T	C	0.52169	-0.0094199	0.047667	0.84334	imputed	0.973	T	C	0.58891	-0.018191	0.050596	0.71919	imputed	0.998	N/A	N/A	N/A	N/A	N/A	N/A	t	c	1.846	0.06486	?-+-	t
2	1HPG	rs1730908	7	22001763	CDCA7L / RAPGEF5	T	C	0.26132	0.14476	0.075251	0.054389	genotyped	1	T	C	0.38	0.0020346	0.028551	0.94319	genotyped	1	T	C	0.22019	0.26652	0.058528	5.27e-06	genotyped	1	T	C	0.074669	-0.27506	0.095878	0.0041199	genotyped	0.999	N/A	N/A	N/A	N/A	N/A	N/A	t	c	1.91	0.05615	+++-	t
2	1HPG	rs2527703	7	22002000	CDCA7L / RAPGEF5	C	A	0.74045	-0.13524	0.075486	0.073205	imputed	0.985	N/A	N/A	N/A	N/A	N/A	N/A	N/A	N/A	C	A	0.78371	-0.27341	0.060358	5.9e-06	imputed	0.95	C	A	0.924192	0.31093	0.10004	0.0018841	imputed	0.928	N/A	N/A	N/A	N/A	N/A	N/A	a	c	1.932	0.05337	?++-	a
2	1HPG	rs2108375	7	40817578	C7orf10	T	C	0.5814	-0.30603	0.066627	4.36e-06	imputed	0.996	T	C	0.81712	-0.00063662	0.035265	0.9856	imputed	0.999	T	C	0.6584	0.068681	0.049439	0.16477	imputed	0.997	T	C	0.4005	-0.021731	0.052507	0.67897	imputed	0.991	N/A	N/A	N/A	N/A	N/A	N/A	t	c	-1.422	0.155	-+--	t
2	1HPG	rs10233069	7	40823373	C7orf10	C	A	0.58169	-0.30473	0.06668	4.88e-06	imputed	0.996	C	A	0.81699	-7.52e-05	0.035271	0.9983	imputed	0.999	C	A	0.65842	0.068679	0.049438	0.16477	imputed	0.997	C	A	0.4001	-0.022101	0.052496	0.67375	imputed	0.992	N/A	N/A	N/A	N/A	N/A	N/A	a	c	1.408	0.1592	+-++	a
2	1HPG	rs2629051	7	95268213	DYNC1I1	C	A	0.10522	0.14429	0.11613	0.21403	imputed	0.944	C	A	0.17774	-0.16218	0.036222	7.56e-06	imputed	0.99	C	A	0.096328	-0.051802	0.083149	0.53329	imputed	0.973	C	A	0.096985	0.066811	0.086638	0.44062	imputed	0.975	N/A	N/A	N/A	N/A	N/A	N/A	a	c	1.619	0.1054	++--	a
2	1HPG	rs2618971	7	95269576	DYNC1I1	T	C	0.89834	-0.12534	0.11471	0.27452	genotyped	0.999	T	C	0.82368	0.16207	0.036155	7.38e-06	genotyped	1	T	C	0.9054	0.053618	0.084543	0.52594	imputed	0.956	T	C	0.904499	-0.06341	0.086041	0.46114	genotyped	1	N/A	N/A	N/A	N/A	N/A	N/A	t	c	1.71	0.0873	++--	t
2	1HPG	rs16915300	8	93957969	FLJ46284 / C8orf83	G	A	0.83699	0.42099	0.091653	4.36e-06	imputed	0.947	G	A	0.86051	-0.0054487	0.040544	0.89309	imputed	0.952	G	A	0.80339	-0.077645	0.060501	0.19936	imputed	0.982	N/A	N/A	N/A	N/A	N/A	N/A	N/A	N/A	N/A	N/A	N/A	N/A	N/A	N/A	a	g	-1.391	0.1641	++-?	a
2	1HPG	rs16915336	8	93971646	FLJ46284 / LOC389676	T	C	0.84302	0.42137	0.09167	4.29e-06	imputed	0.995	T	C	0.934574	-0.018175	0.055063	0.74135	imputed	0.997	T	C	0.80542	-0.067709	0.060474	0.26286	imputed	0.997	N/A	N/A	N/A	N/A	N/A	N/A	N/A	N/A	N/A	N/A	N/A	N/A	N/A	N/A	t	c	1.387	0.1655	--+?	t
2	1HPG	rs1554324	8	134656368	LOC100129104 / ZFAT	G	A	0.43207	0.099104	0.066287	0.13489	genotyped	1	G	A	0.37163	0.075495	0.028128	0.0072745	genotyped	1	G	A	0.45538	0.17887	0.047339	0.00015784	genotyped	1	G	A	0.4028	0.039888	0.052372	0.44628	genotyped	1	G	A	0.4579	-0.06472	0.03814	0.08987	a	g	-4.452	8.49e-06	----	a
2	1HPG	rs12343368	9	93618316	ROR2	N/A	N/A	N/A	N/A	N/A	N/A	N/A	N/A	T	C	0.7185	0.077296	0.032177	0.016295	imputed	0.912	N/A	N/A	N/A	N/A	N/A	N/A	N/A	N/A	T	C	0.76457	0.25397	0.061135	3.26e-05	imputed	0.904	N/A	N/A	N/A	N/A	N/A	N/A	t	c	4.663	3.11e-06	+??+	N/A
2	1HPG	rs4746822	10	70652947	HKDC1	T	C	0.54307	0.21037	0.068504	0.0021337	imputed	0.981	N/A	N/A	N/A	N/A	N/A	N/A	N/A	N/A	T	C	0.65099	0.061132	0.049263	0.21463	imputed	0.988	T	C	0.3508	0.1688	0.052012	0.0011729	imputed	0.955	C	T	0.3255	-0.1495	0.06165	0.0154	t	c	4.226	2.38e-05	?+++	t
2	1HPG	rs1436090	10	78627240	KCNMA1	T	C	0.19829	0.075915	0.082742	0.35889	genotyped	1	T	C	0.27953	-0.13416	0.030351	9.85e-06	genotyped	1	T	C	0.33394	-0.031493	0.050376	0.53187	genotyped	1	T	C	0.085966	-0.12903	0.091083	0.15659	imputed	0.993	N/A	N/A	N/A	N/A	N/A	N/A	t	c	-2.859	0.004249	--+-	t
2	1HPG	rs3847554	11	92308474	LOC100128354	T	C	0.34333	0.16216	0.068278	0.017552	genotyped	1	T	C	0.89535	-0.034076	0.044534	0.44417	genotyped	1	T	C	0.41671	0.2039	0.048044	2.2e-05	genotyped	0.999	T	C	0.5775	0.21185	0.051508	3.91e-05	genotyped	0.999	T	C	0.4393	0.1628	0.03969	4.26e-05	t	c	5.117	3.1e-07	-+++	t
2	1HPG	rs1387153	11	92313476	LOC100128354 / MTNR1B	T	C	0.24051	0.17566	0.076907	0.022367	genotyped	1	T	C	0.33907	0.018078	0.029189	0.5357	genotyped	1	T	C	0.30285	0.27576	0.050491	4.72e-08	genotyped	1	T	C	0.43591	0.19841	0.050377	8.2e-05	genotyped	1	T	C	0.3123	0.234	0.04162	2.12e-08	t	c	6.346	2.21e-10	++++	t
2	1HPG	rs11523890	11	92319426	LOC100128354 / MTNR1B	T	C	0.27784	0.13785	0.073526	0.060821	imputed	0.987	T	C	0.36967	0.0129	0.028883	0.65515	imputed	0.961	T	C	0.33725	0.28696	0.05117	2.05e-08	imputed	0.902	T	C	0.43731	0.19797	0.050565	9.03e-05	imputed	0.992	N/A	N/A	N/A	N/A	N/A	N/A	t	c	6.154	7.53e-10	++++	t
2	1HPG	rs10830956	11	92320661	LOC100128354 / MTNR1B	T	C	0.24164	0.17839	0.076959	0.020447	imputed	0.997	T	C	0.34516	0.018368	0.029521	0.5338	imputed	0.957	T	C	0.31074	0.28481	0.051109	2.51e-08	imputed	0.964	T	C	0.43505	0.19965	0.05068	8.17e-05	imputed	0.986	N/A	N/A	N/A	N/A	N/A	N/A	t	c	6.424	1.33e-10	++++	t
2	1HPG	rs7933855	11	92323970	LOC100128354 / MTNR1B	G	A	0.66029	-0.16434	0.069489	0.018034	imputed	0.993	N/A	N/A	N/A	N/A	N/A	N/A	N/A	N/A	G	A	0.59592	-0.24251	0.048136	4.7e-07	imputed	0.982	G	A	0.54515	-0.17148	0.050916	0.00075771	imputed	0.981	N/A	N/A	N/A	N/A	N/A	N/A	a	g	6.372	1.87e-10	?+++	a
2	1HPG	rs7936247	11	92329680	LOC100128354 / MTNR1B	T	G	0.27791	0.13689	0.07336	0.062049	imputed	0.99	T	G	0.36983	0.012959	0.028921	0.65409	imputed	0.958	T	G	0.33756	0.29023	0.051095	1.35e-08	imputed	0.903	T	G	0.43635	0.19752	0.050653	9.64e-05	imputed	0.995	T	G	0.3605	0.2216	0.04028	4.19e-08	t	g	6.183	6.27e-10	++++	t
2	1HPG	rs11020124	11	92330309	LOC100128354 / MTNR1B	T	C	0.75655	-0.18192	0.078891	0.021115	imputed	0.945	N/A	N/A	N/A	N/A	N/A	N/A	N/A	N/A	N/A	N/A	N/A	N/A	N/A	N/A	N/A	N/A	T	C	0.56806	-0.20332	0.051879	8.89e-05	imputed	0.946	N/A	N/A	N/A	N/A	N/A	N/A	t	c	-4.487	7.22e-06	??--	N/A
2	1HPG	rs2166706	11	92331180	LOC100128354 / MTNR1B	T	C	0.67625	-0.11184	0.070382	0.11207	genotyped	1	T	C	0.34419	-0.005769	0.029631	0.84563	genotyped	1	T	C	0.60973	-0.25021	0.047723	1.58e-07	genotyped	1	T	C	0.55053	-0.16804	0.050505	0.00087715	genotyped	1	N/A	N/A	N/A	N/A	N/A	N/A	t	c	-5.402	6.58e-08	----	t
2	1HPG	rs10830963	11	92348358	MTNR1B	G	C	0.24038	0.24224	0.07797	0.0018913	genotyped	0.999	N/A	N/A	N/A	N/A	N/A	N/A	genotyped	NA	N/A	N/A	N/A	N/A	N/A	N/A	N/A	N/A	G	C	0.42317	0.25378	0.051386	7.87e-07	genotyped	1	N/A	N/A	N/A	N/A	N/A	N/A	c	g	-5.783	7.33e-09	??--	N/A
2	1HPG	rs1562444	11	92355497	MTNR1B	G	A	0.25949	-0.066529	0.076906	0.387	genotyped	1	G	A	0.43071	-0.022624	0.027824	0.41616	genotyped	1	G	A	0.49593	-0.25718	0.046952	4.31e-08	imputed	0.97	G	A	0.26422	-0.15722	0.056687	0.0055475	imputed	0.974	N/A	N/A	N/A	N/A	N/A	N/A	a	g	5.241	1.6e-07	++++	a
2	1HPG	rs4753072	11	92357053	MTNR1B / SLC36A4	C	A	0.25848	-0.050658	0.076846	0.50976	imputed	0.996	C	A	0.42394	-0.026157	0.027941	0.34919	imputed	0.992	C	A	0.49495	-0.25538	0.046719	4.59e-08	imputed	0.978	C	A	0.26326	-0.15735	0.056676	0.0054993	imputed	0.979	N/A	N/A	N/A	N/A	N/A	N/A	a	c	5.208	1.91e-07	++++	a
2	1HPG	rs4753073	11	92357123	MTNR1B / SLC36A4	G	A	0.26194	-0.023834	0.07644	0.75519	genotyped	1	G	A	0.47358	-0.023726	0.027423	0.38692	genotyped	0.999	G	A	0.50949	-0.25819	0.04818	8.37e-08	imputed	0.924	G	A	0.27122	-0.15402	0.055128	0.0052086	genotyped	1	N/A	N/A	N/A	N/A	N/A	N/A	a	g	4.974	6.57e-07	++++	a
2	1HPG	rs1447350	11	92357775	MTNR1B / SLC36A4	G	C	0.26052	-0.031346	0.076594	0.68236	imputed	0.996	G	C	0.46605	-0.019215	0.027419	0.48342	imputed	0.991	G	C	0.50362	-0.25614	0.047407	6.55e-08	imputed	0.953	G	C	0.26625	-0.15888	0.057186	0.0054651	imputed	0.948	N/A	N/A	N/A	N/A	N/A	N/A	c	g	4.951	7.38e-07	++++	c
2	1HPG	rs1447351	11	92357811	MTNR1B / SLC36A4	G	A	0.74174	0.051824	0.076653	0.49899	genotyped	1	G	A	0.57023	0.02343	0.027786	0.3991	genotyped	1	G	A	0.5048	0.25505	0.046541	4.25e-08	imputed	0.987	G	A	0.73579	0.15834	0.057321	0.0057402	imputed	0.951	N/A	N/A	N/A	N/A	N/A	N/A	a	g	-5.17	2.34e-07	----	a
2	1HPG	rs4611171	11	92358855	MTNR1B / SLC36A4	T	G	0.25845	-0.051786	0.076673	0.49942	imputed	0.999	T	G	0.42884	-0.022995	0.027801	0.40817	imputed	1	T	G	0.49263	-0.25253	0.046256	4.78e-08	imputed	1	T	G	0.26295	-0.15915	0.057593	0.0057216	imputed	0.945	N/A	N/A	N/A	N/A	N/A	N/A	t	g	-5.151	2.59e-07	----	t
2	1HPG	rs1597023	11	92360967	MTNR1B / SLC36A4	G	A	0.25887	-0.059216	0.076657	0.43983	genotyped	1	G	A	0.42884	-0.022995	0.027801	0.40817	genotyped	1	G	A	0.49268	-0.2525	0.046249	4.77e-08	genotyped	1	G	A	0.26634	-0.15989	0.057859	0.0057179	imputed	0.928	G	A	0.4699	-0.1841	0.03834	1.68e-06	a	g	5.193	2.07e-07	++++	a
2	1HPG	rs4406791	11	92361435	MTNR1B / SLC36A4	C	A	0.74156	0.051921	0.076675	0.49831	imputed	0.999	C	A	0.5711	0.023046	0.027805	0.40719	imputed	1	C	A	0.50735	0.25251	0.046251	4.77e-08	imputed	1	C	A	0.73692	0.15908	0.057615	0.0057616	imputed	0.943	N/A	N/A	N/A	N/A	N/A	N/A	a	c	-5.152	2.58e-07	----	a
2	1HPG	rs1447352	11	92362409	MTNR1B / SLC36A4	G	A	0.25887	-0.059216	0.076657	0.43983	genotyped	1	G	A	0.4293	-0.023822	0.02782	0.39184	genotyped	1	G	A	0.49268	-0.2525	0.046249	4.77e-08	genotyped	1	G	A	0.26579	-0.15953	0.057849	0.0058226	imputed	0.931	N/A	N/A	N/A	N/A	N/A	N/A	a	g	5.204	1.95e-07	++++	a
2	1HPG	rs6483213	11	92364969	MTNR1B / SLC36A4	G	A	0.73955	0.052198	0.076883	0.49718	imputed	0.989	G	A	0.56719	0.023606	0.028026	0.39963	imputed	0.983	G	A	0.50455	0.25471	0.046576	4.53e-08	imputed	0.987	G	A	0.73145	0.1602	0.058035	0.0057738	imputed	0.918	N/A	N/A	N/A	N/A	N/A	N/A	a	g	-5.164	2.42e-07	----	a
2	1HPG	rs11177766	12	68329870	LRRC10 / BEST3	G	C	0.911114	0.21391	0.12043	0.07569	imputed	0.998	G	C	0.976227	0.17325	0.087678	0.048158	imputed	0.998	G	C	0.86568	0.28397	0.06766	2.71e-05	imputed	0.999	N/A	N/A	N/A	N/A	N/A	N/A	N/A	N/A	N/A	N/A	N/A	N/A	N/A	N/A	c	g	-4.742	2.11e-06	---?	c
2	1HPG	rs10906	12	68333765	BEST3	T	C	0.089351	-0.2074	0.12011	0.084202	genotyped	1	T	C	0.023721	-0.17287	0.087698	0.048699	genotyped	1	T	C	0.13424	-0.28391	0.067653	2.71e-05	genotyped	1	N/A	N/A	N/A	N/A	N/A	N/A	N/A	N/A	N/A	N/A	N/A	N/A	N/A	N/A	t	c	-4.715	2.42e-06	---?	t
2	1HPG	rs11177775	12	68336027	BEST3	T	C	0.088995	-0.2151	0.12046	0.074156	imputed	0.996	T	C	0.026296	-0.16012	0.08462	0.058455	imputed	0.965	T	C	0.13447	-0.28401	0.067664	2.7e-05	imputed	0.998	N/A	N/A	N/A	N/A	N/A	N/A	N/A	N/A	N/A	N/A	N/A	N/A	N/A	N/A	t	c	-4.699	2.61e-06	---?	t
2	1HPG	rs11177777	12	68336677	BEST3	T	A	0.089561	-0.21285	0.12051	0.077357	imputed	0.99	T	A	0.025763	-0.17288	0.087744	0.0488	imputed	0.926	T	A	0.1345	-0.28416	0.067666	2.68e-05	imputed	0.998	N/A	N/A	N/A	N/A	N/A	N/A	N/A	N/A	N/A	N/A	N/A	N/A	N/A	N/A	a	t	4.736	2.18e-06	+++?	a
2	1HPG	rs11177779	12	68336925	BEST3	G	A	0.910867	0.21367	0.12045	0.076084	imputed	0.995	G	A	0.974562	0.16407	0.085754	0.055707	imputed	0.968	G	A	0.86568	0.28376	0.067639	2.73e-05	imputed	0.999	N/A	N/A	N/A	N/A	N/A	N/A	N/A	N/A	N/A	N/A	N/A	N/A	N/A	N/A	a	g	-4.704	2.55e-06	---?	a
2	1HPG	rs11177780	12	68339035	BEST3	G	A	0.910731	0.21404	0.12046	0.075586	imputed	0.993	G	A	0.974908	0.16323	0.087425	0.061893	imputed	0.967	G	A	0.86543	0.28021	0.067621	3.41e-05	imputed	1	N/A	N/A	N/A	N/A	N/A	N/A	N/A	N/A	N/A	N/A	N/A	N/A	N/A	N/A	a	g	-4.646	3.39e-06	---?	a
2	1HPG	rs11177781	12	68341384	BEST3	G	C	0.088161	-0.23069	0.1207	0.055981	imputed	1	G	C	0.023722	-0.1729	0.0877	0.048671	imputed	1	G	C	0.13424	-0.28391	0.067653	2.71e-05	imputed	1	N/A	N/A	N/A	N/A	N/A	N/A	N/A	N/A	N/A	N/A	N/A	N/A	N/A	N/A	c	g	4.807	1.53e-06	+++?	c
2	1HPG	rs11177783	12	68342245	BEST3	T	C	0.911261	0.22444	0.12041	0.062321	genotyped	1	T	C	0.976279	0.17287	0.087698	0.048699	genotyped	1	T	C	0.86576	0.28391	0.067653	2.71e-05	genotyped	1	N/A	N/A	N/A	N/A	N/A	N/A	N/A	N/A	N/A	N/A	N/A	N/A	N/A	N/A	t	c	4.783	1.72e-06	+++?	t
2	1HPG	rs12367331	12	68344089	BEST3	T	A	0.088777	-0.2365	0.12045	0.049593	imputed	0.999	T	A	0.024666	-0.19022	0.086236	0.027398	imputed	0.999	T	A	0.13462	-0.28491	0.067615	2.51e-05	imputed	0.999	N/A	N/A	N/A	N/A	N/A	N/A	N/A	N/A	T	A	0.143	0.01306	0.05387	0.8085	a	t	4.979	6.39e-07	+++?	a
2	1HPG	rs17225496	12	68355738	BEST3	T	C	0.083995	-0.21448	0.12299	0.081178	imputed	0.998	T	C	0.024205	-0.19429	0.086929	0.025413	imputed	0.999	T	C	0.13023	-0.29956	0.068602	1.26e-05	imputed	1	N/A	N/A	N/A	N/A	N/A	N/A	N/A	N/A	N/A	N/A	N/A	N/A	N/A	N/A	t	c	-4.985	6.2e-07	---?	t
2	1HPG	rs11177789	12	68359485	BEST3	C	A	0.093218	-0.1378	0.11842	0.24457	imputed	0.996	C	A	0.028948	-0.20424	0.081704	0.012426	imputed	0.964	C	A	0.14157	-0.27522	0.066593	3.58e-05	imputed	0.988	N/A	N/A	N/A	N/A	N/A	N/A	genotyped	NA	N/A	N/A	N/A	N/A	N/A	N/A	a	c	4.695	2.67e-06	+++?	a
2	1HPG	rs11113250	12	106195996	CRY1 / BTBD11	G	A	0.69756	0.092388	0.072921	0.20517	imputed	1	G	A	0.71035	0.14132	0.030934	4.92e-06	imputed	0.995	G	A	0.57399	0.061198	0.046709	0.19013	imputed	0.998	G	A	0.79948	0.077926	0.061369	0.20415	imputed	0.989	N/A	N/A	N/A	N/A	N/A	N/A	a	g	-4.174	3e-05	----	a
2	1HPG	rs2193353	12	106197025	CRY1 / BTBD11	T	A	0.68573	0.092536	0.074176	0.21221	imputed	0.946	T	A	0.68986	0.14826	0.030998	1.73e-06	imputed	0.923	T	A	0.56668	0.061166	0.047267	0.19565	imputed	0.97	T	A	0.79328	0.072809	0.061567	0.23696	imputed	0.957	N/A	N/A	N/A	N/A	N/A	N/A	a	t	-4.217	2.47e-05	----	a
2	1HPG	rs2374688	12	106197332	CRY1 / BTBD11	T	G	0.30233	-0.092902	0.072888	0.20246	genotyped	1	T	G	0.2893	-0.14156	0.030879	4.56e-06	genotyped	1	T	G	0.42612	-0.05959	0.046626	0.20124	genotyped	1	T	G	0.20001	-0.076383	0.061103	0.21127	imputed	0.999	N/A	N/A	N/A	N/A	N/A	N/A	t	g	-4.157	3.23e-05	----	t
2	1HPG	rs2374689	12	106198500	CRY1 / BTBD11	G	A	0.64321	0.12202	0.069961	0.081141	genotyped	1	G	A	0.63116	0.13072	0.028214	3.6e-06	genotyped	1	G	A	0.45757	0.072727	0.047794	0.12809	genotyped	1	G	A	0.79414	0.094917	0.06029	0.11541	genotyped	1	N/A	N/A	N/A	N/A	N/A	N/A	a	g	-4.685	2.8e-06	----	a
2	1HPG	rs1861691	12	106201676	CRY1 / BTBD11	C	A	0.69214	0.088713	0.072518	0.22121	imputed	0.988	C	A	0.71279	0.14127	0.031246	6.15e-06	imputed	0.983	C	A	0.57792	0.060143	0.047601	0.20641	imputed	0.963	C	A	0.75806	0.073783	0.055838	0.18637	genotyped	1	N/A	N/A	N/A	N/A	N/A	N/A	a	c	-4.133	3.59e-05	----	a
2	1HPG	rs289962	13	21831087	FGF9 / FTHL7	G	A	0.66217	0.067086	0.069405	0.33375	genotyped	1	G	A	0.83535	0.16324	0.036628	8.32e-06	genotyped	1	N/A	N/A	N/A	N/A	N/A	N/A	N/A	N/A	N/A	N/A	N/A	N/A	N/A	N/A	N/A	N/A	N/A	N/A	N/A	N/A	N/A	N/A	a	g	-3.995	6.48e-05	-?-?	N/A
2	1HPG	rs7981347	13	22661822	SGCG	G	A	0.14803	-0.16251	0.091986	0.077283	genotyped	1	G	A	0.25199	-0.015727	0.031708	0.61991	genotyped	0.999	G	A	0.22312	0.080356	0.057083	0.15922	genotyped	1	G	A	0.08871	-0.41401	0.086947	1.92e-06	genotyped	1	N/A	N/A	N/A	N/A	N/A	N/A	a	g	2.674	0.007487	+-++	a
2	1HPG	rs2342227	13	84925872	LOC387939 / SLITRK6	G	A	0.76622	0.080709	0.080976	0.31891	genotyped	1	G	A	0.7293	0.15115	0.030285	6.01e-07	genotyped	1	G	A	0.62363	-0.015636	0.049122	0.75024	genotyped	1	N/A	N/A	N/A	N/A	N/A	N/A	N/A	N/A	N/A	N/A	N/A	N/A	N/A	N/A	a	g	-3.159	0.001581	-+-?	a
2	1HPG	rs1576669	13	84929049	LOC387939 / SLITRK6	T	C	0.21788	-0.070513	0.086948	0.41738	imputed	0.91	T	C	0.24932	-0.16049	0.032237	6.41e-07	imputed	0.929	N/A	N/A	N/A	N/A	N/A	N/A	N/A	N/A	N/A	N/A	N/A	N/A	N/A	N/A	N/A	N/A	N/A	N/A	N/A	N/A	N/A	N/A	t	c	-4.286	1.82e-05	-?-?	N/A
2	1HPG	rs1412031	13	84933860	LOC387939 / SLITRK6	C	A	0.74762	0.037809	0.078707	0.63096	imputed	0.987	C	A	0.73089	0.14407	0.031088	3.58e-06	imputed	0.949	C	A	0.59214	-0.021259	0.049554	0.66792	imputed	0.972	C	A	0.984295	0.079022	0.19684	0.68808	genotyped	1	N/A	N/A	N/A	N/A	N/A	N/A	a	c	-2.456	0.01405	-+--	a
2	1HPG	rs1412032	13	84933915	LOC387939 / SLITRK6	T	C	0.74849	0.039563	0.078525	0.61439	imputed	0.992	T	C	0.7356	0.14197	0.030878	4.27e-06	imputed	0.972	T	C	0.59052	-0.0209	0.049577	0.67334	imputed	0.973	T	C	0.983817	0.12688	0.19451	0.51421	imputed	0.996	N/A	N/A	N/A	N/A	N/A	N/A	t	c	2.581	0.009838	+-++	t
2	1HPG	rs2150218	13	89926431	KRT18P27 / LOC144776	C	A	0.73333	-0.1996	0.075938	0.0085776	imputed	0.978	N/A	N/A	N/A	N/A	N/A	N/A	N/A	N/A	C	A	0.60331	0.1131	0.050126	0.024048	imputed	0.938	C	A	0.66927	0.26801	0.055364	1.29e-06	imputed	0.928	N/A	N/A	N/A	N/A	N/A	N/A	a	c	-3.009	0.002625	?-+-	a
2	1HPG	rs9556022	13	89929964	KRT18P27 / LOC144776	T	G	0.36841	0.25071	0.069303	0.00029727	imputed	0.992	T	G	0.67182	-0.0047814	0.030392	0.87499	imputed	0.909	T	G	0.56322	-0.11948	0.048276	0.013324	imputed	0.998	T	G	0.41007	-0.23055	0.051664	8.1e-06	imputed	0.987	N/A	N/A	N/A	N/A	N/A	N/A	t	g	-2.198	0.02794	--+-	t
2	1HPG	rs9560635	13	89936221	KRT18P27 / LOC144776	T	C	0.3672	0.24513	0.069195	0.00039625	genotyped	1	T	C	0.68419	-0.00069777	0.029329	0.98102	genotyped	1	T	C	0.56291	-0.11816	0.048221	0.014272	genotyped	1	T	C	0.40832	-0.2268	0.05133	9.94e-06	genotyped	1	N/A	N/A	N/A	N/A	N/A	N/A	t	c	-2.128	0.03331	--+-	t
2	1HPG	rs9301679	13	89938730	KRT18P27 / LOC144776	G	A	0.75153	-0.21998	0.076872	0.0042138	genotyped	1	G	A	0.84	0.050158	0.037477	0.18078	genotyped	1	G	A	0.594	0.1138	0.049035	0.020301	genotyped	1	G	A	0.65956	0.25924	0.053203	1.1e-06	imputed	1	N/A	N/A	N/A	N/A	N/A	N/A	a	g	-3.23	0.001239	--+-	a
2	1HPG	rs1929029	13	89939001	KRT18P27 / LOC144776	G	C	0.60917	-0.26017	0.071628	0.00028105	imputed	0.903	G	C	0.30662	-0.00015469	0.030074	0.9959	imputed	0.96	G	C	0.42789	0.12259	0.049308	0.012911	imputed	0.961	G	C	0.57919	0.23287	0.052383	8.77e-06	imputed	0.948	N/A	N/A	N/A	N/A	N/A	N/A	c	g	-2.109	0.0349	+-+-	c
2	1HPG	rs17634218	13	89939352	KRT18P27 / LOC144776	G	A	0.24365	0.22092	0.078446	0.0048598	imputed	0.977	G	A	0.15818	-0.049623	0.037969	0.19124	imputed	0.986	G	A	0.39817	-0.11628	0.049997	0.020035	imputed	0.966	G	A	0.3382	-0.26113	0.053591	1.1e-06	imputed	0.989	N/A	N/A	N/A	N/A	N/A	N/A	a	g	3.236	0.001211	++-+	a
2	1HPG	rs7995366	13	89943135	KRT18P27 / LOC144776	T	C	0.24682	0.22269	0.077251	0.0039436	imputed	0.991	T	C	0.15997	-0.050229	0.037484	0.18024	imputed	1	T	C	0.40551	-0.11605	0.049153	0.018221	imputed	0.996	T	C	0.34017	-0.25993	0.053299	1.08e-06	imputed	0.999	N/A	N/A	N/A	N/A	N/A	N/A	t	c	-3.246	0.001171	--+-	t
2	1HPG	rs914025	13	89944733	KRT18P27 / LOC144776	G	A	0.74386	-0.21931	0.076621	0.0042062	imputed	0.975	G	A	0.72399	0.0018552	0.030902	0.95213	imputed	0.978	G	A	0.59306	0.11366	0.049128	0.020694	imputed	0.992	G	A	0.65735	0.26179	0.053246	8.81e-07	imputed	0.997	N/A	N/A	N/A	N/A	N/A	N/A	a	g	-2.619	0.008824	--+-	a
2	1HPG	rs9522994	13	89949255	KRT18P27 / LOC144776	C	A	0.75887	-0.24238	0.077653	0.0018002	genotyped	1	C	A	0.83535	0.048126	0.037124	0.19485	genotyped	1	C	A	0.6111	0.12025	0.050408	0.017054	imputed	0.954	C	A	0.6587	0.25006	0.053257	2.66e-06	imputed	0.992	N/A	N/A	N/A	N/A	N/A	N/A	a	c	-3.042	0.002349	--+-	a
2	1HPG	rs990102	13	89968202	KRT18P27 / LOC144776	T	C	0.75871	-0.24222	0.077671	0.0018175	imputed	0.999	T	C	0.83352	0.052259	0.03711	0.15906	imputed	0.984	T	C	0.60152	0.11917	0.049095	0.015211	imputed	0.994	T	C	0.65433	0.25327	0.052964	1.74e-06	imputed	0.993	N/A	N/A	N/A	N/A	N/A	N/A	t	c	3.166	0.001545	++-+	t
2	1HPG	rs9523021	13	90001555	KRT18P27 / LOC144776	G	C	0.75255	-0.26068	0.077254	0.00073995	imputed	0.994	G	C	0.7449	0.048867	0.031864	0.12513	imputed	0.969	G	C	0.58758	0.10182	0.049081	0.038038	imputed	0.988	G	C	0.73659	0.26465	0.057868	4.8e-06	imputed	0.981	N/A	N/A	N/A	N/A	N/A	N/A	c	g	-2.815	0.004881	--+-	c
2	1HPG	rs9588939	13	90006163	KRT18P27 / LOC144776	T	A	0.24537	0.2481	0.077152	0.0013011	imputed	1	T	A	0.17788	-0.045885	0.036388	0.20732	imputed	0.998	T	A	0.40873	-0.09806	0.049125	0.045919	imputed	0.998	T	A	0.26035	-0.26336	0.057776	5.16e-06	imputed	0.995	N/A	N/A	N/A	N/A	N/A	N/A	a	t	2.697	0.006986	++-+	a
2	1HPG	rs7318021	13	90008117	KRT18P27 / LOC144776	T	C	0.24541	0.24828	0.077127	0.0012857	genotyped	1	T	C	0.17814	-0.045767	0.036321	0.20764	genotyped	1	T	C	0.40892	-0.097767	0.049075	0.046348	genotyped	1	T	C	0.26061	-0.25862	0.057593	7.11e-06	genotyped	1	N/A	N/A	N/A	N/A	N/A	N/A	t	c	-2.658	0.007851	--+-	t
2	1HPG	rs6571338	14	29730294	LOC100128358 / SYF2P	G	T	0.967753	0.06089	0.18441	0.74126	imputed	0.985	G	T	0.63026	0.12505	0.027917	7.49e-06	imputed	0.997	N/A	N/A	N/A	N/A	N/A	N/A	N/A	N/A	N/A	N/A	N/A	N/A	N/A	N/A	N/A	N/A	N/A	N/A	N/A	N/A	N/A	N/A	t	g	-3.593	0.0003264	-?-?	N/A
2	1HPG	rs7172156	15	49333590	CYP19A1	G	A	0.43574	0.11749	0.070285	0.094612	genotyped	1	G	A	0.67535	0.0035653	0.029123	0.90256	genotyped	1	G	A	0.60205	-0.21017	0.047306	8.88e-06	genotyped	1	G	A	0.70161	-0.021167	0.054285	0.6966	genotyped	1	A	G	0.4196	-0.02807	0.0394	0.4763	a	g	1.889	0.05884	-+-+	a
2	1HPG	rs4795997	17	30090161	TMEM132E / CCT6B	T	G	0.31381	-0.10721	0.072974	0.14179	imputed	0.999	T	G	0.40178	-0.0069431	0.028211	0.8056	imputed	0.997	T	G	0.23963	-0.010936	0.05535	0.84337	imputed	0.994	T	G	0.21815	-0.27146	0.060222	6.55e-06	imputed	0.965	N/A	N/A	N/A	N/A	N/A	N/A	t	g	-3.184	0.001453	----	t
2	1HPG	rs16970316	17	30091348	TMEM132E / CCT6B	G	A	0.68605	0.10713	0.072932	0.14187	genotyped	1	G	A	0.59814	0.0068642	0.028171	0.80749	genotyped	1	G	A	0.76011	0.011081	0.055336	0.84129	imputed	0.994	G	A	0.78178	0.27132	0.060205	6.59e-06	imputed	0.966	N/A	N/A	N/A	N/A	N/A	N/A	a	g	-3.183	0.001455	----	a
2	1HPG	rs6506441	18	6787686	LOC100130480 / ARHGAP28	G	A	0.71481	-0.033378	0.073645	0.65039	genotyped	1	G	A	0.42419	0.0070281	0.028042	0.8021	genotyped	1	G	A	0.76957	0.26031	0.055688	2.95e-06	genotyped	1	G	A	0.6027	0.047512	0.05152	0.35642	genotyped	1	N/A	N/A	N/A	N/A	N/A	N/A	a	g	-2.999	0.002712	--+-	a
2	1HPG	rs6043968	20	16396022	KIF16B	C	A	0.53054	0.023416	0.068209	0.73137	imputed	0.979	C	A	0.34455	-0.026757	0.030025	0.37285	imputed	0.908	C	A	0.55256	0.09867	0.047271	0.036858	imputed	0.987	C	A	0.69576	0.2474	0.054797	6.34e-06	imputed	0.96	N/A	N/A	N/A	N/A	N/A	N/A	a	c	-3.194	0.001405	+---	a
2	1HPG	rs4814501	20	16396205	KIF16B	G	A	0.46695	-0.023836	0.067712	0.72482	genotyped	1	G	A	0.69582	0.037561	0.029392	0.20126	genotyped	1	G	A	0.44367	-0.092665	0.046945	0.048392	genotyped	1	G	A	0.31772	-0.25358	0.054357	3.08e-06	imputed	0.954	N/A	N/A	N/A	N/A	N/A	N/A	a	g	3.021	0.002516	-+++	a
2	1HPG	rs4814503	20	16396454	KIF16B	T	A	0.54185	0.029837	0.067907	0.66038	imputed	0.993	T	A	0.52751	-0.051572	0.028724	0.072586	imputed	0.91	T	A	0.5609	0.093692	0.04745	0.048321	imputed	0.976	T	A	0.69826	0.25645	0.055282	3.5e-06	imputed	0.943	N/A	N/A	N/A	N/A	N/A	N/A	a	t	-2.791	0.005254	+---	a
2	1HPG	rs17740395	20	16400088	KIF16B	T	C	0.62551	-0.0090137	0.069867	0.89735	imputed	0.997	T	C	0.75106	-0.022766	0.032157	0.47897	imputed	0.998	T	C	0.60338	0.090899	0.048297	0.059825	imputed	0.985	T	C	0.74711	0.25708	0.058126	9.74e-06	imputed	0.997	N/A	N/A	N/A	N/A	N/A	N/A	t	c	2.92	0.003503	-+-+	t
2	1HPG	rs2876429	20	16403401	KIF16B	T	C	0.5263	0.015049	0.068228	0.82543	imputed	0.995	T	C	0.25321	-0.029699	0.031076	0.33921	imputed	0.993	T	C	0.54198	0.093435	0.047592	0.049618	imputed	0.974	T	C	0.68843	0.25333	0.054237	3e-06	imputed	0.965	N/A	N/A	N/A	N/A	N/A	N/A	t	c	3.121	0.001805	-+++	t
2	1HPG	rs1573755	22	24600464	MYO18B	C	A	0.970624	0.27791	0.20209	0.16908	genotyped	1	C	A	0.975814	0.44314	0.0904	9.49e-07	genotyped	1	C	A	0.975974	0.059518	0.15935	0.70878	imputed	0.938	C	A	0.927225	-0.048014	0.099319	0.62879	imputed	0.911	N/A	N/A	N/A	N/A	N/A	N/A	a	c	-2.961	0.003065	---+	a
2	1HPG	rs5769452	22	47981818	LOC100128946 / LOC643653	C	A	0.41684	-0.14116	0.067375	0.036161	imputed	0.985	N/A	N/A	N/A	N/A	N/A	N/A	N/A	N/A	C	A	0.67252	-0.12965	0.05147	0.011769	imputed	0.97	C	A	0.33531	-0.21053	0.05256	6.19e-05	imputed	0.992	N/A	N/A	N/A	N/A	N/A	N/A	a	c	5.01	5.44e-07	?+++	a
2	2HPG	rs12402184	1	77575518	AK5	T	G	0.28448	-0.048064	0.056201	0.39243	imputed	0.998	T	G	0.20773	0.0145	0.029479	0.62279	genotyped	0.998	T	G	0.16953	-0.22973	0.051428	7.93e-06	imputed	0.995	T	G	0.43888	0.049876	0.044575	0.26317	genotyped	1	N/A	N/A	N/A	N/A	N/A	N/A	t	g	-2.028	0.04259	+--+	t
2	2HPG	rs7579548	2	33910238	MYADML / LOC100130842	T	G	0.85128	0.041524	0.072525	0.56695	genotyped	1	T	G	0.70977	0.078575	0.026269	0.0027793	genotyped	1	T	G	0.89466	0.2222	0.06257	0.00038337	genotyped	1	T	G	0.5801	0.067632	0.045688	0.13879	imputed	0.981	N/A	N/A	N/A	N/A	N/A	N/A	t	g	4.452	8.51e-06	++++	t
2	2HPG	rs1861441	2	206204994	PARD3B / NRP2	G	A	0.145	-0.3373	0.074023	5.2e-06	genotyped	1	G	A	0.3572	-0.038335	0.024339	0.11525	genotyped	1	G	A	0.1907	-0.03676	0.048822	0.45149	imputed	0.948	G	A	0.13949	0.10481	0.063756	0.1002	genotyped	0.999	N/A	N/A	N/A	N/A	N/A	N/A	a	g	2.301	0.02137	+++-	a
2	2HPG	rs1861440	2	206205215	PARD3B / NRP2	T	A	0.14398	-0.33421	0.074841	7.99e-06	imputed	0.98	T	A	0.36871	-0.036108	0.02461	0.14232	imputed	0.963	T	A	0.1907	-0.035727	0.0483	0.45949	imputed	0.972	T	A	0.14114	0.12157	0.065035	0.061574	imputed	0.96	N/A	N/A	N/A	N/A	N/A	N/A	a	t	2.086	0.037	+++-	a
2	2HPG	rs892605	3	10682861	ATP2B2 / SLC6A11	G	A	0.2246	-0.087447	0.063886	0.17106	genotyped	1	G	A	0.098605	-0.00060315	0.040535	0.98813	genotyped	1	G	A	0.28347	0.002773	0.042465	0.94793	genotyped	1	G	A	0.23829	-0.2369	0.05222	5.72e-06	genotyped	0.999	N/A	N/A	N/A	N/A	N/A	N/A	a	g	2.896	0.00378	+-++	a
2	2HPG	rs892604	3	10683182	ATP2B2 / SLC6A11	G	A	0.77492	0.086286	0.064052	0.17794	imputed	0.993	G	A	0.909449	0.03165	0.041915	0.45019	imputed	0.993	G	A	0.71682	-0.0040486	0.042475	0.92406	imputed	0.999	G	A	0.76301	0.23219	0.05235	9.19e-06	imputed	0.995	N/A	N/A	N/A	N/A	N/A	N/A	a	g	-3.182	0.001462	-+--	a
2	2HPG	rs12695959	3	151850171	SELT / C3orf44	C	A	0.59125	-0.034244	0.056705	0.54591	imputed	0.939	C	A	0.30658	0.11763	0.025932	5.73e-06	genotyped	0.996	N/A	N/A	N/A	N/A	N/A	N/A	N/A	N/A	C	A	0.368	0.0058128	0.045698	0.89878	genotyped	1	N/A	N/A	N/A	N/A	N/A	N/A	a	c	-2.451	0.01423	-?+-	N/A
2	2HPG	rs1879807	3	151850513	SELT / C3orf44	C	A	0.42767	0.036608	0.056432	0.51652	imputed	0.93	C	A	0.70469	-0.12343	0.026782	4.05e-06	imputed	0.94	N/A	N/A	N/A	N/A	N/A	N/A	N/A	N/A	C	A	0.63882	-0.00073095	0.046402	0.98743	imputed	0.968	N/A	N/A	N/A	N/A	N/A	N/A	a	c	2.402	0.01629	+?-+	N/A
2	2HPG	rs4399946	4	90414020	GPRIN3	C	T	0.9541	-0.032779	0.12124	0.78689	genotyped	1	C	T	0.78372	0.031596	0.028842	0.2733	genotyped	1	C	T	0.911851	0.073759	0.065333	0.25891	genotyped	1	C	T	0.988574	-0.95475	0.20708	4.02e-06	genotyped	0.997	N/A	N/A	N/A	N/A	N/A	N/A	t	c	1.326	0.1849	--++	t
2	2HPG	rs4692973	4	93669372	GRID2	T	C	0.83966	0.12533	0.06945	0.071139	genotyped	1	T	C	0.73209	-0.0024532	0.026717	0.92684	genotyped	1	T	C	0.74169	-0.20284	0.043138	2.58e-06	genotyped	1	T	C	0.78395	-0.025662	0.051823	0.62047	genotyped	1	N/A	N/A	N/A	N/A	N/A	N/A	t	c	-2.136	0.03269	--+-	t
2	2HPG	rs10025074	4	95693585	PDLIM5	G	A	0.13038	-0.070255	0.079376	0.37611	imputed	0.953	G	A	0.30393	-0.021618	0.026601	0.41641	imputed	0.97	G	A	0.18857	0.22873	0.050511	5.95e-06	imputed	0.948	G	A	0.068431	-0.082829	0.088362	0.34856	imputed	0.977	N/A	N/A	N/A	N/A	N/A	N/A	a	g	-1.251	0.2111	+-++	a
2	2HPG	rs6830074	4	95701234	PDLIM5	T	G	0.15678	-0.08967	0.073416	0.22194	imputed	0.966	T	G	0.62445	-0.018904	0.024975	0.4491	imputed	0.986	T	G	0.20035	0.25208	0.049395	3.33e-07	imputed	0.944	T	G	0.069535	-0.076623	0.087908	0.38341	imputed	0.975	N/A	N/A	N/A	N/A	N/A	N/A	t	g	1.487	0.137	-+--	t
2	2HPG	rs3805274	4	95701843	PDLIM5	T	C	0.1515	-0.088426	0.075378	0.24076	imputed	0.924	T	C	0.60158	-0.01591	0.025372	0.53062	imputed	0.908	T	C	0.19752	0.25121	0.049939	4.9e-07	imputed	0.93	T	C	0.066953	-0.081181	0.090597	0.37022	imputed	0.952	N/A	N/A	N/A	N/A	N/A	N/A	t	c	1.518	0.1289	-+--	t
2	2HPG	rs2452593	4	95706737	PDLIM5	G	A	0.20685	-0.064022	0.064594	0.32162	genotyped	1	G	A	0.62	-0.00069237	0.024664	0.97761	genotyped	1	G	A	0.22421	0.23952	0.046143	2.09e-07	genotyped	1	G	A	0.071736	-0.047413	0.086402	0.58318	genotyped	1	G	A	0.2329	-0.03963	0.03889	0.3083	a	g	-2.159	0.03082	+-++	a
2	2HPG	rs2452594	4	95708105	PDLIM5	G	A	0.79137	0.069195	0.065042	0.2874	imputed	0.979	G	A	0.35782	-0.0058792	0.025439	0.81723	imputed	0.974	G	A	0.77253	-0.2344	0.046792	5.46e-07	imputed	0.958	N/A	N/A	N/A	N/A	N/A	N/A	N/A	N/A	N/A	N/A	N/A	N/A	N/A	N/A	a	g	2.844	0.004449	++-?	a
2	2HPG	rs3828518	4	95719651	PDLIM5	G	A	0.1787	-0.044872	0.069203	0.51672	genotyped	1	G	A	0.31953	-0.0027782	0.025851	0.91442	genotyped	1	G	A	0.21529	0.21983	0.0476	3.87e-06	imputed	0.973	G	A	0.12903	-0.022022	0.066623	0.74098	genotyped	1	N/A	N/A	N/A	N/A	N/A	N/A	a	g	-2.062	0.03921	+-++	a
2	2HPG	rs11097431	4	95725865	PDLIM5	G	A	0.82374	0.054422	0.069676	0.43476	genotyped	1	G	A	0.70419	0.0075476	0.02658	0.77644	genotyped	1	G	A	0.788	-0.21819	0.047426	4.21e-06	imputed	0.993	G	A	0.87114	0.0143	0.06762	0.83251	imputed	0.965	N/A	N/A	N/A	N/A	N/A	N/A	a	g	1.97	0.04887	-+--	a
2	2HPG	rs17336353	4	95735539	PDLIM5	G	A	0.16952	-0.055913	0.070505	0.42776	genotyped	1	G	A	0.25256	0.012927	0.027822	0.6422	genotyped	1	G	A	0.20922	0.22105	0.047361	3.05e-06	genotyped	1	G	A	0.12401	-0.0049168	0.068862	0.94308	imputed	0.958	N/A	N/A	N/A	N/A	N/A	N/A	a	g	-2.442	0.01459	--++	a
2	2HPG	rs6816687	4	95740420	PDLIM5	G	A	0.82436	0.05305	0.06972	0.44672	genotyped	1	G	A	0.70884	0.011032	0.026778	0.68036	genotyped	1	G	A	0.78895	-0.21361	0.047426	6.66e-06	genotyped	1	N/A	N/A	N/A	N/A	N/A	N/A	N/A	N/A	N/A	N/A	N/A	N/A	N/A	N/A	a	g	2.3	0.02147	-+-?	a
2	2HPG	rs7655928	4	95787979	PDLIM5	C	A	0.1667	-0.082147	0.07149	0.25053	imputed	0.993	C	A	0.35121	0.035366	0.024936	0.15611	imputed	0.993	C	A	0.21136	0.23095	0.047484	1.15e-06	imputed	0.98	C	A	0.12677	-0.0043914	0.067867	0.94841	imputed	0.986	N/A	N/A	N/A	N/A	N/A	N/A	a	c	-2.871	0.004086	--++	a
2	2HPG	rs7656545	4	95788239	PDLIM5	T	A	0.15514	-0.073205	0.075141	0.32994	imputed	0.941	N/A	N/A	N/A	N/A	N/A	N/A	N/A	N/A	T	A	0.20692	0.23318	0.048246	1.34e-06	imputed	0.959	N/A	N/A	N/A	N/A	N/A	N/A	N/A	N/A	N/A	N/A	N/A	N/A	N/A	N/A	a	t	-3.228	0.001247	?-+?	a
2	2HPG	rs11097432	4	95798728	PDLIM5	T	C	0.82558	0.071745	0.070742	0.3105	genotyped	1	T	C	0.65116	-0.035208	0.024954	0.15826	genotyped	1	T	C	0.77981	-0.21252	0.046508	4.89e-06	genotyped	1	N/A	N/A	N/A	N/A	N/A	N/A	N/A	N/A	N/A	N/A	N/A	N/A	N/A	N/A	t	c	-3.262	0.001106	--+?	t
2	2HPG	rs10025288	4	95800743	PDLIM5	G	A	0.82612	0.06306	0.070876	0.37361	imputed	0.997	G	A	0.65641	-0.035936	0.025304	0.15556	imputed	0.977	G	A	0.78336	-0.21492	0.047251	5.4e-06	imputed	0.979	G	A	0.87134	0.01394	0.068516	0.83878	imputed	0.949	N/A	N/A	N/A	N/A	N/A	N/A	a	g	2.737	0.006198	++--	a
2	2HPG	rs1056772	4	95804248	PDLIM5	G	A	0.18115	-0.084713	0.069333	0.22177	genotyped	1	G	A	0.33302	0.042805	0.025101	0.088137	genotyped	1	G	A	0.22568	0.20867	0.046223	6.35e-06	genotyped	1	G	A	0.13246	-0.0074658	0.066813	0.91103	imputed	0.979	N/A	N/A	N/A	N/A	N/A	N/A	a	g	-2.763	0.005722	--++	a
2	2HPG	rs7285	4	95808360	PDLIM5	G	A	0.82619	0.063014	0.07079	0.37338	genotyped	1	G	A	0.66744	-0.042921	0.025092	0.087169	genotyped	1	G	A	0.78022	-0.21143	0.046534	5.53e-06	imputed	0.999	G	A	0.87564	0.017922	0.067897	0.79181	genotyped	1	N/A	N/A	N/A	N/A	N/A	N/A	a	g	2.846	0.004429	++--	a
2	2HPG	rs6869694	5	55536624	ANKRD55	G	A	0.91125	-0.049101	0.095705	0.60792	imputed	0.985	G	A	0.80843	-0.011195	0.030961	0.71767	imputed	0.912	G	A	0.962194	-0.45332	0.10074	6.8e-06	imputed	0.993	G	A	0.942629	0.035305	0.094135	0.70763	imputed	0.991	A	G	0.0403	0.09047	0.0838	0.2804	a	g	2.703	0.006882	+++-	a
2	2HPG	rs16885032	5	55545333	ANKRD55	T	C	0.087515	0.056495	0.095778	0.55529	genotyped	1	T	C	0.21023	0.021375	0.028523	0.45363	genotyped	1	T	C	0.038123	0.44464	0.10028	9.25e-06	imputed	0.994	T	C	0.06315	-0.02306	0.091859	0.80178	imputed	0.951	N/A	N/A	N/A	N/A	N/A	N/A	t	c	2.954	0.003139	+++-	t
2	2HPG	rs12654710	5	55547305	ANKRD55	T	G	0.903916	-0.061247	0.091096	0.50137	genotyped	1	T	G	0.72	-0.018503	0.025597	0.46976	genotyped	1	T	G	0.96196	-0.44259	0.10016	9.91e-06	genotyped	1	T	G	0.935349	0.012595	0.088913	0.88735	imputed	0.998	N/A	N/A	N/A	N/A	N/A	N/A	t	g	-3.024	0.002493	---+	t
2	2HPG	rs12654772	5	55547543	ANKRD55	T	A	0.903392	-0.062818	0.091114	0.49055	imputed	0.994	T	A	0.7239	-0.02348	0.025998	0.36646	imputed	0.989	T	A	0.960971	-0.45389	0.10157	7.87e-06	imputed	0.963	T	A	0.93507	0.013055	0.088846	0.88318	imputed	0.993	N/A	N/A	N/A	N/A	N/A	N/A	a	t	3.145	0.001661	+++-	a
2	2HPG	rs6879574	5	55550225	ANKRD55	G	C	0.096134	0.061251	0.091104	0.50138	imputed	0.999	G	C	0.27391	0.024684	0.025916	0.34087	imputed	0.999	G	C	0.038049	0.45675	0.10165	7.01e-06	imputed	0.989	G	C	0.064604	-0.012596	0.088908	0.88733	imputed	0.999	N/A	N/A	N/A	N/A	N/A	N/A	c	g	-3.178	0.001481	---+	c
2	2HPG	rs6859894	5	55550238	ANKRD55	T	A	0.096135	0.061255	0.091104	0.50135	imputed	0.999	T	A	0.27395	0.024687	0.025912	0.34074	imputed	0.999	T	A	0.03809	0.45657	0.10164	7.06e-06	imputed	0.988	T	A	0.06463	-0.012634	0.088913	0.88701	imputed	0.998	N/A	N/A	N/A	N/A	N/A	N/A	a	t	-3.177	0.001486	---+	a
2	2HPG	rs6860267	5	55550452	ANKRD55	T	A	0.091714	0.066178	0.095407	0.48791	imputed	0.947	T	A	0.26532	0.023879	0.026723	0.37154	imputed	0.958	T	A	0.035439	0.49766	0.11001	6.08e-06	imputed	0.913	T	A	0.061978	-0.011816	0.092757	0.89864	imputed	0.956	N/A	N/A	N/A	N/A	N/A	N/A	a	t	-3.183	0.001459	---+	a
2	2HPG	rs4958876	5	150402958	TNIP1	C	A	0.903917	-0.39295	0.086129	5.06e-06	genotyped	1	C	A	0.76372	0.0069005	0.026957	0.79797	genotyped	1	C	A	0.88295	0.039605	0.058747	0.50021	genotyped	1	C	A	0.935908	0.039382	0.090422	0.66318	genotyped	1	N/A	N/A	N/A	N/A	N/A	N/A	a	c	1.233	0.2175	--+-	a
2	2HPG	rs12658895	5	150404546	TNIP1	T	C	0.096765	0.39664	0.086328	4.34e-06	imputed	0.992	T	C	0.23749	-0.0071146	0.027344	0.79472	imputed	0.975	T	C	0.1169	-0.036638	0.058807	0.53327	imputed	0.998	T	C	0.06469	-0.042677	0.091026	0.63918	imputed	0.964	N/A	N/A	N/A	N/A	N/A	N/A	t	c	1.256	0.2091	--+-	t
2	2HPG	rs12188542	5	163555593	LOC391844 / LOC391845	G	A	0.56219	-0.051123	0.054284	0.34631	imputed	0.997	G	A	0.82641	-0.0042212	0.030421	0.88964	imputed	0.999	G	A	0.61551	0.17185	0.038415	7.69e-06	imputed	1	G	A	0.69906	0.031027	0.047525	0.51384	genotyped	1	N/A	N/A	N/A	N/A	N/A	N/A	a	g	-2.347	0.01892	+-+-	a
2	2HPG	rs17284960	5	163556080	LOC391844 / LOC391845	T	C	0.43819	0.052561	0.054226	0.3324	genotyped	1	T	C	0.17349	0.0042149	0.030416	0.88979	genotyped	1	T	C	0.38442	-0.17184	0.038409	7.68e-06	genotyped	1	T	C	0.30215	-0.033693	0.048143	0.48401	imputed	0.975	T	C	0.3814	-0.08718	0.03365	0.009633	t	c	-2.36	0.01828	+-+-	t
2	2HPG	rs4626470	6	9047385	LOC389365 / OFCC1	G	A	0.33476	0.2049	0.054208	0.00015688	genotyped	1	G	A	0.12465	0.065997	0.036623	0.071537	genotyped	1	N/A	N/A	N/A	N/A	N/A	N/A	N/A	N/A	G	A	0.10611	0.16746	0.070111	0.016921	genotyped	1	N/A	N/A	N/A	N/A	N/A	N/A	a	g	-4.496	6.93e-06	-?--	N/A
2	2HPG	rs12661878	6	54801969	LOC100128671 / FAM83B	T	C	0.081381	0.11786	0.096284	0.22091	imputed	0.991	T	C	0.27906	0.0062457	0.026124	0.81105	imputed	0.998	T	C	0.1037	0.28284	0.062703	6.46e-06	imputed	0.989	T	C	0.30499	0.0032154	0.049126	0.94781	imputed	0.943	N/A	N/A	N/A	N/A	N/A	N/A	t	c	3.18	0.001471	++++	t
2	2HPG	rs12664770	6	54802105	LOC100128671 / FAM83B	G	A	0.081199	0.11849	0.096338	0.21871	imputed	0.994	G	A	0.27916	0.0062549	0.026129	0.8108	imputed	0.998	G	A	0.10376	0.28283	0.062709	6.47e-06	imputed	0.988	G	A	0.30475	0.0025515	0.04913	0.95858	imputed	0.943	N/A	N/A	N/A	N/A	N/A	N/A	a	g	-3.176	0.001494	----	a
2	2HPG	rs12663440	6	54802416	LOC100128671 / FAM83B	T	C	0.918928	-0.11839	0.09632	0.21901	imputed	0.996	T	C	0.72101	-0.0062193	0.026116	0.81177	imputed	0.999	T	C	0.89675	-0.28273	0.06288	6.91e-06	imputed	0.99	T	C	0.69513	-0.0038662	0.049171	0.93733	imputed	0.942	N/A	N/A	N/A	N/A	N/A	N/A	t	c	-3.181	0.001468	----	t
2	2HPG	rs11964138	6	54802799	LOC100128671 / FAM83B	G	A	0.918881	-0.11846	0.096329	0.2188	imputed	0.995	G	A	0.72125	-0.0069681	0.026117	0.78962	imputed	0.999	G	A	0.89757	-0.28079	0.06291	8.07e-06	imputed	1	G	A	0.69537	-0.0028861	0.049181	0.9532	imputed	0.941	N/A	N/A	N/A	N/A	N/A	N/A	a	g	3.167	0.001542	++++	a
2	2HPG	rs11964644	6	54803083	LOC100128671 / FAM83B	T	C	0.080783	0.1184	0.096292	0.21885	genotyped	1	T	C	0.2786	0.0069061	0.026106	0.79136	genotyped	1	T	C	0.10241	0.28101	0.062905	7.92e-06	genotyped	1	T	C	0.30974	0.014435	0.049542	0.77077	imputed	0.922	N/A	N/A	N/A	N/A	N/A	N/A	t	c	3.288	0.001011	++++	t
2	2HPG	rs11964669	6	54803100	LOC100128671 / FAM83B	T	G	0.080888	0.11815	0.096314	0.21993	imputed	0.999	T	G	0.27797	0.0063668	0.02613	0.8075	imputed	0.998	T	G	0.10074	0.29027	0.065492	9.33e-06	imputed	0.945	T	G	0.3044	0.0033544	0.049196	0.94564	imputed	0.941	N/A	N/A	N/A	N/A	N/A	N/A	t	g	3.142	0.001681	++++	t
2	2HPG	rs7756134	6	162658794	PARK2	T	C	0.033048	-0.073836	0.14337	0.60656	genotyped	1	T	C	0.15763	-0.031355	0.033051	0.34279	genotyped	1	T	C	0.039503	0.44233	0.094807	3.08e-06	genotyped	1	T	C	0.059847	-0.14615	0.090926	0.10797	genotyped	1	T	C	0.04055	0.01414	0.0841	0.8665	t	c	1.074	0.283	-+--	t
2	2HPG	rs7742255	6	162659172	PARK2	N/A	N/A	N/A	N/A	N/A	N/A	N/A	N/A	T	A	0.84267	0.031199	0.033076	0.34556	imputed	0.999	T	A	0.960302	-0.44239	0.094763	3.04e-06	imputed	0.994	T	A	0.940142	0.14623	0.091091	0.10843	imputed	0.998	N/A	N/A	N/A	N/A	N/A	N/A	a	t	1.439	0.1501	-+?-	a
2	2HPG	rs2898452	8	16863266	MRPL49P2 / FGF20	G	C	0.16897	0.14027	0.070807	0.047593	imputed	0.991	N/A	N/A	N/A	N/A	N/A	N/A	N/A	N/A	G	C	0.053585	0.21027	0.083545	0.011839	imputed	0.985	G	C	0.44599	0.13797	0.043303	0.0014418	imputed	0.994	N/A	N/A	N/A	N/A	N/A	N/A	c	g	-4.467	7.92e-06	?---	c
2	2HPG	rs1523648	8	16864728	MRPL49P2 / FGF20	G	A	0.8297	-0.13947	0.070414	0.047624	imputed	0.992	N/A	N/A	N/A	N/A	N/A	N/A	N/A	N/A	G	A	0.94592	-0.20753	0.08344	0.012876	imputed	0.982	G	A	0.55314	-0.13801	0.043258	0.001421	imputed	0.997	N/A	N/A	N/A	N/A	N/A	N/A	a	g	4.451	8.55e-06	?+++	a
2	2HPG	rs261557	8	97112767	C8orf37 / LOC643228	C	A	0.24847	0.0052997	0.060054	0.92968	genotyped	1	C	A	0.34372	0.0027111	0.024793	0.91293	genotyped	1	C	A	0.33169	-0.18615	0.041493	7.25e-06	imputed	0.951	C	A	0.24466	-0.0087509	0.049501	0.85968	imputed	0.958	N/A	N/A	N/A	N/A	N/A	N/A	a	c	2.49	0.01279	-+-+	a
2	2HPG	rs497805	8	97122262	C8orf37 / LOC643228	T	G	0.75643	-0.0076075	0.060857	0.90052	genotyped	1	T	G	0.76186	0.010969	0.02742	0.68914	genotyped	1	T	G	0.67191	0.18498	0.040685	5.45e-06	genotyped	1	T	G	0.76104	0.0178	0.049042	0.71664	genotyped	1	G	T	0.321	-0.02097	0.03555	0.5553	t	g	2.854	0.004319	++-+	t
2	2HPG	rs553892	8	97182002	C8orf37 / GDF6	G	A	0.13705	-0.036204	0.077832	0.64182	imputed	0.96	N/A	N/A	N/A	N/A	N/A	N/A	N/A	N/A	G	A	0.21156	-0.21032	0.047608	9.97e-06	imputed	0.956	N/A	N/A	N/A	N/A	N/A	N/A	N/A	N/A	N/A	N/A	N/A	N/A	N/A	N/A	a	g	3.78	0.000157	?++?	a
2	2HPG	rs2587000	8	97191828	C8orf37 / GDF6	T	C	0.13219	-0.053747	0.075384	0.47586	genotyped	1	T	C	0.049767	0.041849	0.054081	0.43903	genotyped	1	T	C	0.22385	-0.21271	0.045657	3.18e-06	genotyped	1	T	C	0.1371	0.015554	0.063805	0.80741	genotyped	1	T	C	0.2235	0.008076	0.03994	0.8398	t	c	-2.385	0.01706	+--+	t
2	2HPG	rs7034573	9	9507017	PTPRD	A	C	0.957581	0.63036	0.13213	1.84e-06	imputed	0.923	A	C	0.82682	-0.047146	0.030828	0.12619	imputed	0.967	N/A	N/A	N/A	N/A	N/A	N/A	N/A	N/A	N/A	N/A	N/A	N/A	N/A	N/A	genotyped	NA	N/A	N/A	N/A	N/A	N/A	N/A	a	c	1.982	0.04745	-?+?	N/A
2	2HPG	rs12573114	10	4548326	LOC100128356 / LOC338588	G	A	0.86021	0.20467	0.077571	0.008326	imputed	0.988	G	A	0.84539	0.087785	0.032423	0.0067788	imputed	0.975	G	A	0.78409	0.12116	0.046801	0.009631	imputed	0.968	N/A	N/A	N/A	N/A	N/A	N/A	N/A	N/A	N/A	N/A	N/A	N/A	N/A	N/A	a	g	-4.553	5.3e-06	---?	a
2	2HPG	rs5030937	10	70645903	SUPV3L1 / HKDC1	T	C	0.51163	0.19642	0.052461	0.00018098	genotyped	1	T	C	0.20558	0.04134	0.028826	0.15153	genotyped	1	T	C	0.64647	0.17404	0.039128	8.67e-06	imputed	0.999	T	C	0.30263	0.18951	0.046909	5.35e-05	genotyped	1	N/A	N/A	N/A	N/A	N/A	N/A	t	c	6.863	6.74e-12	++++	t
2	2HPG	rs5030938	10	70645922	SUPV3L1 / HKDC1	T	C	0.51163	0.19642	0.052461	0.00018097	genotyped	1	T	C	0.20838	0.040275	0.028395	0.15608	genotyped	1	T	C	0.64631	0.17293	0.039119	9.85e-06	genotyped	1	T	C	0.30263	0.18951	0.046909	5.35e-05	genotyped	1	N/A	N/A	N/A	N/A	N/A	N/A	t	c	6.84	7.91e-12	++++	t
2	2HPG	rs10998646	10	70646708	SUPV3L1 / HKDC1	T	G	0.36046	0.071165	0.054524	0.19183	genotyped	1	T	G	0.13581	0.065672	0.03415	0.054474	genotyped	1	T	G	0.56515	0.16072	0.037873	2.2e-05	imputed	0.992	T	G	0.15407	0.078771	0.060532	0.19315	genotyped	1	G	T	0.415	-0.1843	0.04373	2.61e-05	t	g	4.533	5.83e-06	++++	t
2	2HPG	rs10998647	10	70647314	SUPV3L1 / HKDC1	T	G	0.47482	-0.20356	0.05284	0.00011696	imputed	0.975	N/A	N/A	N/A	N/A	N/A	N/A	N/A	N/A	T	G	0.35848	-0.18335	0.04014	4.93e-06	imputed	0.946	T	G	0.67409	-0.18397	0.046988	9.03e-05	imputed	0.936	N/A	N/A	N/A	N/A	N/A	N/A	t	g	-7.129	1.01e-12	?---	t
2	2HPG	rs17566087	10	70648962	HKDC1	A	G	0.940024	0.44787	0.10896	3.95e-05	genotyped	1	A	G	0.983256	0.14143	0.092754	0.12731	genotyped	1	A	G	0.932523	0.25938	0.076537	0.0007017	imputed	0.91	N/A	N/A	N/A	N/A	N/A	N/A	genotyped	NA	G	A	0.06455	-0.227	0.06896	0.001011	a	g	5.129	2.92e-07	+++?	a
2	2HPG	rs5030941	10	70652736	HKDC1	T	C	0.37864	-0.14347	0.055091	0.0092088	imputed	0.952	N/A	N/A	N/A	N/A	N/A	N/A	N/A	N/A	T	C	0.27271	-0.12067	0.04282	0.0048317	imputed	0.957	N/A	N/A	N/A	N/A	N/A	N/A	N/A	N/A	T	C	0.2611	-0.1374	0.05014	0.006185	t	c	-3.822	0.0001322	?--?	t
2	2HPG	rs4746822	10	70652947	HKDC1	T	C	0.54307	0.22929	0.053377	1.74e-05	imputed	0.981	N/A	N/A	N/A	N/A	N/A	N/A	N/A	N/A	T	C	0.65099	0.17758	0.039526	7.03e-06	imputed	0.988	T	C	0.3508	0.16738	0.045568	0.00023944	imputed	0.955	C	T	0.3255	-0.2796	0.05225	9.68e-08	t	c	7.157	8.26e-13	?+++	t
2	2HPG	rs2394529	10	70655273	HKDC1	N/A	N/A	N/A	N/A	N/A	N/A	N/A	N/A	G	C	0.52574	-0.035374	0.023774	0.13678	imputed	0.926	G	C	0.35546	-0.18209	0.04037	6.47e-06	imputed	0.932	N/A	N/A	N/A	N/A	N/A	N/A	N/A	N/A	N/A	N/A	N/A	N/A	N/A	N/A	c	g	4.362	1.29e-05	++??	c
2	2HPG	rs4746825	10	70655651	HKDC1	T	C	0.37516	0.086946	0.053921	0.10686	imputed	0.999	T	C	0.1353	0.060294	0.03429	0.078688	imputed	0.976	T	C	0.57128	0.16085	0.037802	2.09e-05	imputed	0.999	T	C	0.16641	0.081586	0.058154	0.16064	imputed	0.997	N/A	N/A	N/A	N/A	N/A	N/A	t	c	4.642	3.45e-06	++++	t
2	2HPG	rs9645499	10	70656616	HKDC1	G	A	0.59547	-0.20346	0.054106	0.00016961	genotyped	1	G	A	0.56605	-0.03185	0.023095	0.16786	genotyped	1	G	A	0.57498	-0.11335	0.038429	0.0031822	genotyped	1	G	A	0.70119	-0.11515	0.046825	0.013929	genotyped	1	A	G	0.4435	0.0975	0.04061	0.01645	a	g	5.197	2.03e-07	++++	a
2	2HPG	rs9645500	10	70656729	HKDC1	T	G	0.45753	-0.21801	0.052985	3.88e-05	imputed	0.994	T	G	0.53317	-0.035923	0.023038	0.11892	imputed	0.99	T	G	0.34675	-0.17666	0.039447	7.52e-06	imputed	0.993	T	G	0.65238	-0.16235	0.044765	0.00028697	genotyped	1	N/A	N/A	N/A	N/A	N/A	N/A	t	g	-6.888	5.67e-12	----	t
2	2HPG	rs9645501	10	70656772	HKDC1	G	A	0.62672	-0.080608	0.053833	0.1343	imputed	0.999	G	A	0.86435	-0.058916	0.034304	0.085894	imputed	0.974	G	A	0.43277	-0.15876	0.037905	2.81e-05	imputed	0.993	G	A	0.83403	-0.088264	0.058302	0.13005	imputed	1	N/A	N/A	N/A	N/A	N/A	N/A	a	g	4.593	4.37e-06	++++	a
2	2HPG	rs10823320	10	70657066	HKDC1	A	G	0.977356	0.50791	0.17314	0.0033517	genotyped	1	N/A	N/A	N/A	N/A	N/A	N/A	genotyped	NA	A	G	0.94989	0.32659	0.085286	0.00012847	genotyped	1	N/A	N/A	N/A	N/A	N/A	N/A	genotyped	NA	N/A	N/A	N/A	N/A	N/A	N/A	a	g	4.824	1.41e-06	?++?	a
2	2HPG	rs10762266	10	70657325	HKDC1	T	G	0.28825	0.17741	0.05691	0.0018242	genotyped	1	T	G	0.11023	0.022227	0.037336	0.55162	genotyped	1	T	G	0.30395	0.066054	0.041336	0.11005	genotyped	1	T	G	0.1944	0.25184	0.054141	3.29e-06	genotyped	1	N/A	N/A	N/A	N/A	N/A	N/A	t	g	4.914	8.9e-07	++++	t
2	2HPG	rs7923953	10	70658042	HKDC1	T	C	0.69675	-0.18111	0.056265	0.0012867	imputed	0.997	T	C	0.63947	-0.018801	0.024726	0.44703	imputed	0.975	T	C	0.69337	-0.067702	0.041229	0.10057	imputed	0.998	T	C	0.77041	-0.20817	0.050953	4.4e-05	imputed	0.988	N/A	N/A	N/A	N/A	N/A	N/A	t	c	-4.772	1.82e-06	----	t
2	2HPG	rs1983127	10	70659907	HKDC1	T	G	0.47368	-0.16957	0.051447	0.00098048	genotyped	1	T	G	0.32744	-0.02412	0.025	0.33465	genotyped	1	T	G	0.406	-0.12843	0.038475	0.00084351	genotyped	1	N/A	N/A	N/A	N/A	N/A	N/A	N/A	N/A	T	G	0.3856	-0.2196	0.04566	1.62e-06	t	g	-4.366	1.26e-05	---?	t
2	2HPG	rs4746827	10	70662052	HKDC1	G	A	0.56966	-0.2455	0.055844	1.1e-05	imputed	0.91	N/A	N/A	N/A	N/A	N/A	N/A	N/A	N/A	G	A	0.58987	-0.10872	0.038741	0.0050093	imputed	0.944	G	A	0.73832	-0.10262	0.052065	0.048721	imputed	0.95	A	G	0.4404	0.02557	0.03833	0.5048	a	g	5.123	3e-07	?+++	a
2	2HPG	rs12266369	10	84824782	NRG3 / LOC728027	T	C	0.70384	-0.27554	0.058825	2.81e-06	imputed	0.995	T	C	0.64679	0.012695	0.024657	0.60666	imputed	0.995	T	C	0.71479	-0.042176	0.041465	0.30908	imputed	0.998	T	C	0.42148	0.057283	0.045486	0.2079	genotyped	1	N/A	N/A	N/A	N/A	N/A	N/A	t	c	-1.672	0.09449	+--+	t
2	2HPG	rs12266381	10	84824837	NRG3 / LOC728027	T	C	0.70339	-0.27562	0.058844	2.81e-06	imputed	0.993	T	C	0.65707	0.01143	0.025325	0.65175	imputed	0.941	T	C	0.71478	-0.042172	0.041465	0.30913	imputed	0.998	T	C	0.42175	0.05722	0.04551	0.20865	imputed	0.999	N/A	N/A	N/A	N/A	N/A	N/A	t	c	-1.704	0.0883	+--+	t
2	2HPG	rs4478935	10	84825565	NRG3 / LOC728027	T	C	0.29662	0.2756	0.058713	2.68e-06	imputed	0.999	T	C	0.33761	-0.0091641	0.025502	0.71933	imputed	0.925	T	C	0.28567	0.042128	0.041491	0.30993	imputed	0.996	T	C	0.57808	-0.055832	0.045556	0.22036	imputed	0.998	N/A	N/A	N/A	N/A	N/A	N/A	t	c	1.769	0.07681	-++-	t
2	2HPG	rs4144220	10	84825845	NRG3 / LOC728027	T	C	0.70328	-0.27568	0.058722	2.67e-06	imputed	0.999	T	C	0.66214	0.0091926	0.025508	0.71856	imputed	0.924	T	C	0.71456	-0.042141	0.041477	0.30963	imputed	0.997	T	C	0.42191	0.055616	0.045557	0.22216	imputed	0.997	N/A	N/A	N/A	N/A	N/A	N/A	t	c	-1.772	0.07638	+--+	t
2	2HPG	rs4144221	10	84826036	NRG3 / LOC728027	C	A	0.76561	-0.27758	0.062173	8.02e-06	genotyped	1	C	A	0.74558	0.030179	0.027266	0.26836	genotyped	1	C	A	0.87601	-0.092754	0.057371	0.10594	genotyped	1	C	A	0.53011	-0.0012746	0.045261	0.97753	imputed	0.996	N/A	N/A	N/A	N/A	N/A	N/A	a	c	2.283	0.02244	-+++	a
2	2HPG	rs11146249	10	133870687	STK32C	G	A	0.911873	0.038647	0.089843	0.66708	genotyped	1	G	A	0.905116	0.039053	0.040413	0.33387	genotyped	1	G	A	0.83467	-0.23733	0.051118	3.44e-06	genotyped	1	G	A	0.7326	0.013777	0.049298	0.77988	genotyped	1	N/A	N/A	N/A	N/A	N/A	N/A	a	g	1.773	0.07625	-+--	a
2	2HPG	rs10830963	11	92348358	MTNR1B	G	C	0.24038	0.15666	0.060732	0.0098931	genotyped	0.999	N/A	N/A	N/A	N/A	N/A	N/A	genotyped	NA	N/A	N/A	N/A	N/A	N/A	N/A	N/A	N/A	G	C	0.42317	0.16326	0.045023	0.00028763	genotyped	1	N/A	N/A	N/A	N/A	N/A	N/A	c	g	-4.437	9.11e-06	??--	N/A
2	2HPG	rs7980712	12	16042955	DERA	G	A	0.098531	0.053878	0.086577	0.53374	genotyped	1	G	A	0.21535	0.01119	0.029015	0.69973	genotyped	1	G	A	0.15069	-0.037914	0.053809	0.48106	genotyped	1	G	A	0.017403	0.76047	0.16864	6.5e-06	genotyped	1	N/A	N/A	N/A	N/A	N/A	N/A	a	g	-2.389	0.01688	-+--	a
2	2HPG	rs7305618	12	119887315	LOC643550 / C12orf27	T	C	0.1683	-0.11477	0.068217	0.092487	genotyped	1	T	C	0.39721	0.013119	0.024238	0.58832	genotyped	1	T	C	0.23884	-0.20529	0.043707	2.64e-06	genotyped	1	T	C	0.65743	0.017075	0.045811	0.70935	genotyped	1	T	C	0.2441	-0.04391	0.03804	0.2485	t	c	-2.871	0.004098	+--+	t
2	2HPG	rs2297210	13	74796597	TBC1D4	N/A	N/A	N/A	N/A	N/A	N/A	N/A	N/A	C	A	0.60097	0.10696	0.023801	7e-06	genotyped	0.998	C	A	0.37576	0.058486	0.04017	0.1454	genotyped	0.987	C	A	0.19822	-0.057599	0.054287	0.28869	genotyped	1	N/A	N/A	N/A	N/A	N/A	N/A	a	c	-2.738	0.006176	--?+	a
2	2HPG	rs4145677	14	31920334	AKAP6	T	C	0.86472	0.043941	0.076636	0.5664	imputed	0.985	T	C	0.973226	-0.033405	0.073704	0.65038	imputed	0.968	T	C	0.85143	-0.082389	0.053859	0.12609	imputed	0.999	T	C	0.62429	0.2075	0.044114	2.56e-06	imputed	0.981	N/A	N/A	N/A	N/A	N/A	N/A	t	c	1.597	0.1102	--++	t
2	2HPG	rs3784177	14	31921354	AKAP6	C	A	0.1824	-0.069452	0.067539	0.30379	genotyped	1	C	A	0.029783	0.053102	0.069364	0.44393	genotyped	0.996	C	A	0.1605	0.088479	0.052021	0.088979	genotyped	0.998	C	A	0.38243	-0.20882	0.043828	1.89e-06	genotyped	1	N/A	N/A	N/A	N/A	N/A	N/A	a	c	1.575	0.1152	--++	a
2	2HPG	rs8020615	14	31928189	AKAP6	T	C	0.21246	-0.059765	0.065367	0.36056	imputed	0.945	T	C	0.2291	-0.017017	0.028683	0.55299	imputed	0.955	T	C	0.21136	0.097279	0.046313	0.035689	imputed	0.976	T	C	0.47505	-0.20399	0.0437	3.04e-06	imputed	0.961	N/A	N/A	N/A	N/A	N/A	N/A	t	c	-1.924	0.0544	-+--	t
2	2HPG	rs17596339	15	44530935	SQRDL / SEMA6D	G	A	0.87209	0.0084304	0.076833	0.91263	genotyped	1	G	A	0.84279	0.14653	0.032144	5.15e-06	genotyped	1	G	A	0.83067	0.054133	0.053058	0.30761	imputed	0.933	N/A	N/A	N/A	N/A	N/A	N/A	N/A	N/A	N/A	N/A	N/A	N/A	N/A	N/A	a	g	-3.334	0.0008564	---?	a
2	2HPG	rs9930055	16	9464414	LOC653737 / GRIN2A	C	A	0.6794	-0.011339	0.056284	0.84034	imputed	0.985	C	A	0.72251	0.12247	0.027482	8.33e-06	imputed	0.948	C	A	0.58589	-0.01347	0.038905	0.72917	imputed	0.978	C	A	0.53116	-0.012273	0.044851	0.78436	imputed	0.99	N/A	N/A	N/A	N/A	N/A	N/A	a	c	-1.774	0.07607	-+++	a
2	FCP	rs7417283	1	108105209	VAV3	T	C	0.68911	0.0077704	0.0070052	0.26733	imputed	0.983	T	C	0.69391	0.033735	0.0076228	9.62e-06	imputed	0.982	T	C	0.81765	0.016208	0.0072489	0.025352	imputed	0.939	N/A	N/A	N/A	N/A	N/A	N/A	N/A	N/A	N/A	N/A	N/A	N/A	N/A	N/A	t	c	4.541	5.59e-06	+++?	t
2	FCP	rs11185178	1	108131449	VAV3	T	G	0.31413	-0.0081115	0.0070452	0.24959	imputed	0.978	T	G	0.30001	-0.035057	0.0076576	4.69e-06	imputed	0.986	T	G	0.19415	-0.016275	0.006991	0.019915	imputed	0.97	T	G	0.2275	0.0016324	0.0072587	0.82206	genotyped	1	N/A	N/A	N/A	N/A	N/A	N/A	t	g	-3.918	8.95e-05	---+	t
2	FCP	rs4914961	1	108135286	VAV3	T	C	0.30966	-0.0084079	0.0069921	0.22918	imputed	1	T	C	0.29639	-0.035144	0.00765	4.35e-06	imputed	0.998	T	C	0.1901	-0.015824	0.0069943	0.023671	imputed	0.993	T	C	0.22776	0.0016123	0.0072585	0.82422	imputed	0.999	N/A	N/A	N/A	N/A	N/A	N/A	t	c	-3.912	9.14e-05	---+	t
2	FCP	rs4244133	1	108136145	VAV3	T	C	0.31089	-0.0084218	0.006996	0.22867	genotyped	1	T	C	0.29671	-0.035119	0.0076434	4.33e-06	genotyped	1	T	C	0.19318	-0.016373	0.0069467	0.018427	genotyped	0.999	T	C	0.22784	0.0014684	0.007264	0.83981	imputed	0.996	N/A	N/A	N/A	N/A	N/A	N/A	t	c	-3.976	7.01e-05	---+	t
2	FCP	rs1260326	2	27584444	GCKR	T	C	0.32987	-0.029837	0.0071597	3.08e-05	genotyped	1	T	C	0.12254	-0.014889	0.01082	0.16879	genotyped	1	T	C	0.39794	-0.023807	0.0054888	1.44e-05	genotyped	1	T	C	0.34253	-0.018117	0.0064049	0.0046743	genotyped	1	T	C	0.4093	-0.01159	0.004549	0.01092	t	c	-6.334	2.39e-10	----	t
2	FCP	rs780094	2	27594741	GCKR	T	C	0.33476	-0.028121	0.0071059	7.58e-05	genotyped	1	T	C	0.17981	-0.019809	0.0093415	0.033957	genotyped	1	T	C	0.39024	-0.025466	0.0054802	3.37e-06	genotyped	1	T	C	0.32258	-0.016656	0.0065801	0.011364	genotyped	1	N/A	N/A	N/A	N/A	N/A	N/A	t	c	-6.627	3.42e-11	----	t
2	FCP	rs780093	2	27596107	GCKR	T	C	0.33415	-0.028415	0.0071224	6.62e-05	genotyped	1	T	C	0.13333	-0.012273	0.010351	0.23573	genotyped	1	T	C	0.38963	-0.025097	0.0054887	4.82e-06	imputed	0.998	T	C	0.32461	-0.016494	0.0065763	0.012136	genotyped	1	N/A	N/A	N/A	N/A	N/A	N/A	t	c	-6.129	8.85e-10	----	t
2	FCP	rs780092	2	27596658	GCKR	G	A	0.10832	0.0049733	0.010686	0.64164	genotyped	1	G	A	0.21878	0.012705	0.0084435	0.13239	genotyped	1	G	A	0.16703	0.030272	0.0073022	3.39e-05	genotyped	1	G	A	0.4062	0.020631	0.0062056	0.00088533	genotyped	1	G	A	0.1639	0.009414	0.005918	0.1118	a	g	-4.955	7.23e-07	----	a
2	FCP	rs814295	2	27596719	GCKR	G	A	0.11567	0.0031864	0.010469	0.76086	genotyped	1	G	A	0.21737	0.012537	0.0084704	0.13885	genotyped	1	G	A	0.16864	0.02985	0.0073231	4.58e-05	imputed	0.989	G	A	0.40302	0.020931	0.0062391	0.00079419	imputed	0.994	N/A	N/A	N/A	N/A	N/A	N/A	a	g	-4.851	1.23e-06	----	a
2	FCP	rs1260333	2	27602128	GCKR / LOC100130981	G	A	0.63319	0.023532	0.0069303	0.00068503	imputed	0.987	G	A	0.61411	0.013462	0.0073412	0.06669	genotyped	0.914	G	A	0.5503	0.025152	0.0054247	3.54e-06	genotyped	1	G	A	0.67312	0.013577	0.0066763	0.041996	imputed	0.967	A	G	0.4454	-0.0107	0.004444	0.01609	a	g	-5.982	2.2e-09	----	a
2	FCP	rs2911711	2	27604050	GCKR / LOC100130981	T	A	0.36697	-0.023405	0.0069292	0.00073074	imputed	0.988	T	A	0.38641	-0.013239	0.0073456	0.071488	imputed	0.915	T	A	0.44971	-0.025136	0.0054246	3.59e-06	imputed	1	T	A	0.32679	-0.013604	0.0066773	0.041616	imputed	0.966	N/A	N/A	N/A	N/A	N/A	N/A	a	t	5.96	2.53e-09	++++	a
2	FCP	rs4665382	2	27637305	GCKR / LOC100130981	T	C	0.53488	0.01822	0.0065752	0.005589	genotyped	1	T	C	0.952113	0.032297	0.016356	0.048305	genotyped	1	T	C	0.7435	0.017814	0.0062389	0.0042997	imputed	0.993	N/A	N/A	N/A	N/A	N/A	N/A	N/A	N/A	C	T	0.2689	-0.01093	0.005024	0.02978	t	c	4.372	1.23e-05	+++?	t
2	FCP	rs1919127	2	27654997	C2orf16	T	C	0.52999	0.017858	0.0065828	0.0066713	genotyped	1	T	C	0.80845	0.012013	0.0089639	0.18019	genotyped	1	T	C	0.74156	0.017817	0.006205	0.0040873	genotyped	1	T	C	0.5921	0.013662	0.0061976	0.027493	genotyped	1	N/A	N/A	N/A	N/A	N/A	N/A	t	c	4.555	5.24e-06	++++	t
2	FCP	rs1919128	2	27655263	C2orf16	G	A	0.46512	-0.017759	0.0065752	0.0069159	genotyped	1	G	A	0.060563	-0.019038	0.014863	0.20024	genotyped	1	G	A	0.2569	-0.017791	0.0062252	0.0042638	imputed	0.995	G	A	0.40789	-0.013662	0.0061976	0.027497	genotyped	1	N/A	N/A	N/A	N/A	N/A	N/A	a	g	4.513	6.38e-06	++++	a
2	FCP	rs12478841	2	27665226	ZNF512	G	A	0.47001	-0.017858	0.0065828	0.0066714	genotyped	1	G	A	0.19202	-0.012277	0.0089608	0.17067	genotyped	1	G	A	0.26755	-0.018082	0.0061856	0.0034645	imputed	0.98	G	A	0.40833	-0.014443	0.0062137	0.020103	imputed	0.998	N/A	N/A	N/A	N/A	N/A	N/A	a	g	4.66	3.16e-06	++++	a
2	FCP	rs6760250	2	27665756	ZNF512	G	A	0.52999	0.017858	0.0065828	0.0066714	imputed	1	G	A	0.80694	0.012797	0.0089901	0.15459	imputed	0.99	G	A	0.73241	0.01808	0.0061851	0.0034649	imputed	0.98	G	A	0.59168	0.014489	0.006212	0.019674	genotyped	1	N/A	N/A	N/A	N/A	N/A	N/A	a	g	-4.691	2.72e-06	----	a
2	FCP	rs13022873	2	27669014	ZNF512	C	A	0.46972	-0.017878	0.0065869	0.0066449	imputed	0.999	C	A	0.19849	-0.012085	0.0089631	0.17757	imputed	0.962	C	A	0.26754	-0.018084	0.0061862	0.0034638	imputed	0.98	C	A	0.40736	-0.014441	0.0062136	0.020119	imputed	0.994	N/A	N/A	N/A	N/A	N/A	N/A	a	c	4.65	3.32e-06	++++	a
2	FCP	rs12467476	2	27679219	ZNF512	T	C	0.53609	0.017108	0.0065772	0.0092919	imputed	0.998	T	C	0.937547	0.023396	0.015457	0.13012	imputed	0.9	T	C	0.7342	0.018174	0.0062046	0.0033995	imputed	0.975	T	C	0.59497	0.014028	0.0061993	0.023645	imputed	0.999	N/A	N/A	N/A	N/A	N/A	N/A	t	c	4.654	3.25e-06	++++	t
2	FCP	rs2384656	2	27685559	ZNF512	G	A	0.4797	-0.017031	0.0064967	0.0087545	imputed	0.999	G	A	0.19338	-0.013175	0.0089586	0.14139	imputed	0.994	G	A	0.26634	-0.018139	0.0061985	0.0034303	imputed	0.974	G	A	0.40558	-0.013465	0.0062151	0.030271	imputed	0.994	N/A	N/A	N/A	N/A	N/A	N/A	a	g	4.591	4.42e-06	++++	a
2	FCP	rs4666000	2	27692873	ZNF512	T	C	0.51882	0.016602	0.0065007	0.010654	imputed	0.998	T	C	0.8025	0.013957	0.0089334	0.11821	imputed	0.982	T	C	0.72842	0.017801	0.0061262	0.0036649	imputed	0.999	T	C	0.59401	0.013827	0.0062297	0.02645	imputed	0.991	N/A	N/A	N/A	N/A	N/A	N/A	t	c	4.623	3.79e-06	++++	t
2	FCP	rs2068834	2	27693043	ZNF512	T	C	0.51898	0.0166	0.006492	0.010561	genotyped	1	T	C	0.80511	0.01389	0.0089152	0.11922	genotyped	1	T	C	0.72834	0.017793	0.0061244	0.0036686	genotyped	1	T	C	0.59411	0.014396	0.0062228	0.020701	imputed	0.994	N/A	N/A	N/A	N/A	N/A	N/A	t	c	4.67	3.01e-06	++++	t
2	FCP	rs12465038	2	172911673	DLX2 / ITGA6	G	A	0.54162	-0.0043476	0.0065339	0.50579	genotyped	1	G	A	0.84582	-0.0015823	0.0099496	0.87364	genotyped	0.998	N/A	N/A	N/A	N/A	N/A	N/A	N/A	N/A	G	A	0.942011	-0.060011	0.013144	4.98e-06	imputed	0.948	N/A	N/A	N/A	N/A	N/A	N/A	a	g	3.27	0.001074	+?++	N/A
2	FCP	rs11686765	2	172918228	DLX2 / ITGA6	T	G	0.39461	0.0056999	0.0067832	0.40074	imputed	0.974	T	G	0.16141	0.00054085	0.0099991	0.95686	imputed	0.942	T	G	0.4148	-0.0073397	0.0057152	0.19905	imputed	0.926	T	G	0.056699	0.05841	0.013091	8.13e-06	imputed	0.985	N/A	N/A	N/A	N/A	N/A	N/A	t	g	1.978	0.04794	+-++	t
2	FCP	rs11689740	2	180725096	KIAA1604 / LOC729009	G	C	0.32465	0.00072101	0.007323	0.92157	imputed	0.93	G	C	0.37017	0.0031636	0.0077108	0.6816	imputed	0.928	G	C	0.23344	0.031392	0.0067375	3.17e-06	imputed	0.957	G	C	0.21775	0.0024462	0.0074852	0.74382	imputed	0.963	N/A	N/A	N/A	N/A	N/A	N/A	c	g	-2.998	0.002716	----	c
2	FCP	rs181721	3	13104241	IQSEC1 / NUP210	T	C	0.87176	-0.0033445	0.010112	0.74083	imputed	0.994	T	C	0.66981	0.017684	0.0075293	0.018837	imputed	0.935	T	C	0.74292	0.022318	0.0062197	0.00033293	imputed	0.982	T	C	0.83088	0.023609	0.0081211	0.0036481	imputed	0.953	N/A	N/A	N/A	N/A	N/A	N/A	t	c	4.502	6.72e-06	++-+	t
2	FCP	rs4684119	3	13106195	IQSEC1 / NUP210	G	A	0.83471	0.0046432	0.0091422	0.61154	imputed	1	G	A	0.67347	0.018391	0.0077674	0.017902	genotyped	0.925	G	A	0.69558	0.017777	0.0059605	0.0028596	imputed	0.969	G	A	0.83362	0.022233	0.0079314	0.0050602	genotyped	1	N/A	N/A	N/A	N/A	N/A	N/A	a	g	-4.482	7.39e-06	----	a
2	FCP	rs2600203	3	13111829	IQSEC1 / NUP210	T	C	0.12125	0.0012922	0.010325	0.90041	imputed	0.981	T	C	0.22137	-0.022582	0.0085748	0.008449	imputed	0.939	T	C	0.25397	-0.021516	0.0062379	0.00056203	imputed	0.989	T	C	0.16584	-0.021407	0.007999	0.0074463	imputed	0.989	N/A	N/A	N/A	N/A	N/A	N/A	t	c	-4.534	5.78e-06	--+-	t
2	FCP	rs360751	3	13114038	IQSEC1 / NUP210	T	C	0.12125	0.0012824	0.010342	0.90132	imputed	0.977	T	C	0.21541	-0.023435	0.0086464	0.0067201	imputed	0.947	T	C	0.25353	-0.021284	0.0062334	0.00063899	imputed	0.993	T	C	0.15882	-0.022791	0.0081907	0.0053944	imputed	0.991	N/A	N/A	N/A	N/A	N/A	N/A	t	c	-4.608	4.07e-06	--+-	t
2	FCP	rs165567	3	13115732	IQSEC1 / NUP210	G	A	0.88617	0.0013867	0.010457	0.8945	genotyped	1	G	A	0.79343	0.023588	0.0086276	0.0062577	genotyped	1	G	A	0.7467	0.020847	0.0062149	0.00079532	genotyped	1	G	A	0.83361	0.021801	0.0080226	0.0065787	genotyped	1	N/A	N/A	N/A	N/A	N/A	N/A	a	g	-4.663	3.12e-06	----	a
2	FCP	rs13065253	3	71504504	FOXP1	G	T	0.77786	0.015808	0.0077754	0.042047	genotyped	1	G	T	0.73713	-0.037863	0.0083639	5.98e-06	genotyped	0.999	G	T	0.67145	8.66e-05	0.0057556	0.98799	genotyped	1	G	T	0.979202	-0.018611	0.021762	0.39245	genotyped	1	N/A	N/A	N/A	N/A	N/A	N/A	t	g	1.781	0.07494	+--+	t
2	FCP	rs9790670	4	15340472	BST1	G	C	0.83364	-0.022255	0.0091975	0.015533	imputed	0.991	G	C	0.87981	-0.018939	0.010929	0.083133	imputed	1	G	C	0.962662	-0.051376	0.01407	0.00026084	imputed	0.993	N/A	N/A	N/A	N/A	N/A	N/A	N/A	N/A	N/A	N/A	N/A	N/A	N/A	N/A	c	g	4.573	4.81e-06	+++?	c
2	FCP	rs16892283	4	15340632	BST1	G	A	0.16621	0.022224	0.0091945	0.015644	imputed	0.993	G	A	0.12015	0.018878	0.010934	0.084244	imputed	1	G	A	0.040036	0.053755	0.01389	0.00010885	imputed	0.942	N/A	N/A	N/A	N/A	N/A	N/A	N/A	N/A	N/A	N/A	N/A	N/A	N/A	N/A	a	g	-4.71	2.48e-06	---?	a
2	FCP	rs16892287	4	15341291	BST1	T	C	0.16658	0.022242	0.009199	0.015611	imputed	0.99	T	C	0.12015	0.018878	0.010934	0.084249	imputed	1	T	C	0.037498	0.051477	0.014076	0.00025504	imputed	0.989	N/A	N/A	N/A	N/A	N/A	N/A	N/A	N/A	N/A	N/A	N/A	N/A	N/A	N/A	t	c	4.572	4.82e-06	+++?	t
2	FCP	rs16892289	4	15341401	BST1	G	C	0.835	-0.022442	0.0091985	0.014699	imputed	0.998	G	C	0.87979	-0.018924	0.010929	0.083362	imputed	1	G	C	0.962797	-0.051448	0.014075	0.00025692	imputed	0.997	G	C	0.39699	-0.012823	0.00641	0.045446	genotyped	0.999	N/A	N/A	N/A	N/A	N/A	N/A	c	g	4.96	7.07e-07	++++	c
2	FCP	rs4321629	4	15341478	BST1	T	C	0.16532	0.022187	0.0091847	0.015709	imputed	0.999	T	C	0.12018	0.018834	0.010935	0.085008	imputed	0.999	T	C	0.03759	0.051406	0.014079	0.00026093	imputed	0.987	N/A	N/A	N/A	N/A	N/A	N/A	N/A	N/A	N/A	N/A	N/A	N/A	N/A	N/A	t	c	4.565	5e-06	+++?	t
2	FCP	rs10516290	4	15341554	BST1	T	C	0.83537	-0.022258	0.0092491	0.016105	imputed	0.986	T	C	0.87569	-0.019587	0.010927	0.073033	imputed	0.974	T	C	0.962369	-0.051652	0.014118	0.00025355	imputed	0.979	N/A	N/A	N/A	N/A	N/A	N/A	N/A	N/A	N/A	N/A	N/A	N/A	N/A	N/A	t	c	-4.605	4.12e-06	---?	t
2	FCP	rs10516291	4	15341889	BST1	T	C	0.16559	0.022203	0.0091886	0.015678	imputed	0.997	T	C	0.12015	0.018877	0.010934	0.084263	imputed	1	T	C	0.037667	0.051574	0.014079	0.00024897	imputed	0.985	N/A	N/A	N/A	N/A	N/A	N/A	N/A	N/A	N/A	N/A	N/A	N/A	N/A	N/A	t	c	4.576	4.75e-06	+++?	t
2	FCP	rs16898413	4	15341928	BST1	T	C	0.83474	-0.022191	0.0091846	0.015689	imputed	1	T	C	0.87981	-0.018939	0.01093	0.083128	imputed	1	T	C	0.962773	-0.051417	0.014072	0.00025843	imputed	0.996	N/A	N/A	N/A	N/A	N/A	N/A	N/A	N/A	N/A	N/A	N/A	N/A	N/A	N/A	t	c	-4.573	4.81e-06	---?	t
2	FCP	rs4435745	4	15342257	BST1	G	A	0.16574	0.022198	0.009189	0.015706	imputed	0.996	G	A	0.12015	0.018878	0.010934	0.084255	imputed	1	G	A	0.037346	0.051574	0.014077	0.00024862	imputed	0.993	N/A	N/A	N/A	N/A	N/A	N/A	N/A	N/A	N/A	N/A	N/A	N/A	N/A	N/A	a	g	-4.575	4.75e-06	---?	a
2	FCP	rs7658970	4	74932814	LOC728045	T	C	0.31083	-0.037981	0.0070605	7.47e-08	imputed	0.967	T	C	0.89934	0.0011261	0.011936	0.92484	imputed	0.979	T	C	0.30033	0.0017021	0.0059888	0.77625	imputed	0.962	T	C	0.39599	0.0091849	0.0064292	0.15311	imputed	0.957	N/A	N/A	N/A	N/A	N/A	N/A	t	c	-1.371	0.1704	++-+	t
2	FCP	rs872914	4	74936965	PF4V1	G	A	0.30722	-0.036217	0.0070015	2.31e-07	genotyped	1	G	A	0.88451	-0.0040142	0.011111	0.7179	genotyped	1	G	A	0.29555	0.0017237	0.0059118	0.77062	genotyped	1	G	A	0.39088	0.0088491	0.0063552	0.16379	imputed	0.989	N/A	N/A	N/A	N/A	N/A	N/A	a	g	1.52	0.1285	+-+-	a
2	FCP	rs941758	4	74937805	PF4V1	C	A	0.30539	-0.037251	0.0069763	9.32e-08	genotyped	1	C	A	0.89577	0.0057109	0.011645	0.62384	genotyped	1	C	A	0.29675	0.0016125	0.0059446	0.7862	imputed	0.985	C	A	0.39261	0.0090733	0.0063209	0.15116	genotyped	1	N/A	N/A	N/A	N/A	N/A	N/A	a	c	1.163	0.2448	--+-	a
2	FCP	rs4074	4	74955008	CXCL1	G	A	0.4541	0.032252	0.0065511	8.52e-07	genotyped	1	G	A	0.077465	0.0073745	0.013486	0.58449	genotyped	1	G	A	0.62976	0.00039012	0.0058024	0.9464	imputed	0.912	G	A	0.58023	-0.0064815	0.0061468	0.29168	genotyped	1	N/A	N/A	N/A	N/A	N/A	N/A	a	g	-1.878	0.06044	---+	a
2	FCP	rs6858086	4	74956335	CXCL1 / LOC642958	T	C	0.54334	-0.031486	0.0065474	1.52e-06	imputed	0.996	T	C	0.920426	-0.0047763	0.013479	0.72308	imputed	0.974	T	C	0.36344	-0.0021993	0.0057678	0.70297	imputed	0.935	T	C	0.4198	0.0064789	0.0061484	0.292	imputed	1	N/A	N/A	N/A	N/A	N/A	N/A	t	c	-1.909	0.0563	---+	t
2	FCP	rs552582	4	75074722	PPBP / CXCL5	G	A	0.911573	0.052566	0.011463	4.52e-06	imputed	0.946	N/A	N/A	N/A	N/A	N/A	N/A	N/A	N/A	G	A	0.88667	-0.011454	0.0085735	0.18156	imputed	0.954	G	A	0.936734	0.0025313	0.012948	0.845	imputed	0.909	N/A	N/A	N/A	N/A	N/A	N/A	a	g	-1.527	0.1267	?+--	a
2	FCP	rs3017696	4	105701055	LOC728847 / LOC391679	G	A	0.58321	0.0073548	0.0066705	0.27021	imputed	0.999	G	A	0.62951	-0.0090272	0.0072061	0.21031	imputed	0.998	G	A	0.647	0.0041261	0.0057064	0.46964	imputed	0.997	G	A	0.71257	-0.029896	0.0066717	7.43e-06	imputed	0.997	N/A	N/A	N/A	N/A	N/A	N/A	a	g	2.052	0.04013	+--+	a
2	FCP	rs3017697	4	105701119	LOC728847 / LOC391679	G	A	0.41066	-0.0060304	0.0067321	0.37038	imputed	0.999	G	A	0.18121	0.011505	0.0092344	0.21279	imputed	0.996	G	A	0.35092	-0.0042733	0.0057098	0.45422	imputed	0.999	G	A	0.28694	0.029976	0.006671	7.01e-06	imputed	0.998	N/A	N/A	N/A	N/A	N/A	N/A	a	g	-2.13	0.03315	-++-	a
2	FCP	rs2189213	4	105704141	LOC728847 / LOC391679	T	A	0.58938	0.0060265	0.0067316	0.37065	imputed	0.999	T	A	0.81903	-0.011504	0.0092327	0.21276	imputed	0.998	T	A	0.6491	0.0042731	0.0057097	0.45423	imputed	1	T	A	0.71268	-0.029819	0.0066719	7.85e-06	imputed	0.997	N/A	N/A	N/A	N/A	N/A	N/A	a	t	2.118	0.03417	+--+	a
2	FCP	rs2905636	4	105706781	LOC728847 / LOC391679	T	C	0.41072	-0.0060287	0.0067327	0.37055	imputed	0.999	T	C	0.18097	0.011501	0.0092321	0.21283	imputed	0.998	T	C	0.3509	-0.0042731	0.0057097	0.45423	imputed	1	T	C	0.28697	0.029949	0.0066712	7.14e-06	imputed	0.998	N/A	N/A	N/A	N/A	N/A	N/A	t	c	2.128	0.03331	+--+	t
2	FCP	rs2866749	4	105707925	LOC728847 / LOC391679	T	C	0.41043	-0.0060208	0.0067349	0.37134	imputed	0.998	T	C	0.18047	0.011461	0.0092655	0.21611	imputed	0.994	T	C	0.35112	-0.004268	0.0057113	0.45489	imputed	0.999	T	C	0.28453	0.030199	0.00673	7.22e-06	imputed	0.986	N/A	N/A	N/A	N/A	N/A	N/A	t	c	2.124	0.03367	+--+	t
2	FCP	rs2860485	4	105709594	LOC728847 / LOC391679	T	C	0.58998	0.0060107	0.006743	0.37271	imputed	0.999	T	C	0.81898	-0.011502	0.0092319	0.21282	imputed	0.997	T	C	0.64902	0.0042725	0.0057104	0.45434	imputed	0.999	T	C	0.7126	-0.02975	0.0066738	8.28e-06	imputed	0.996	N/A	N/A	N/A	N/A	N/A	N/A	t	c	-2.114	0.03453	-++-	t
2	FCP	rs1468230	4	105712089	LOC728847 / LOC391679	G	C	0.40999	-0.0060115	0.006743	0.37265	imputed	0.999	G	C	0.18117	0.011608	0.0092368	0.20884	imputed	0.995	G	C	0.34912	-0.0042585	0.0057177	0.4564	imputed	1	G	C	0.28793	0.029553	0.0066591	9.08e-06	imputed	0.999	N/A	N/A	N/A	N/A	N/A	N/A	c	g	-2.111	0.03479	-++-	c
2	FCP	rs3017707	4	105712770	LOC728847 / LOC391679	G	A	0.37515	-0.0049561	0.0068769	0.47111	genotyped	1	G	A	0.19202	0.015015	0.0091263	0.099917	genotyped	1	G	A	0.3337	-0.0058096	0.0058158	0.31782	genotyped	1	G	A	0.28778	0.029531	0.0066576	9.18e-06	genotyped	1	N/A	N/A	N/A	N/A	N/A	N/A	a	g	-2.233	0.02557	-++-	a
2	FCP	rs1548492	4	105717659	LOC728847 / LOC391679	T	C	0.58223	0.0076272	0.0068978	0.26884	imputed	0.946	T	C	0.83393	-0.011719	0.0097258	0.22822	imputed	0.97	T	C	0.64908	0.0041167	0.0059428	0.48848	imputed	0.92	T	C	0.71223	-0.029531	0.0066576	9.18e-06	genotyped	1	N/A	N/A	N/A	N/A	N/A	N/A	t	c	-2.021	0.04328	-++-	t
2	FCP	rs852559	5	10990272	DAP / CTNND2	G	A	0.38633	-0.0062976	0.0067664	0.352	imputed	0.978	G	A	0.14013	-0.0071237	0.010409	0.49372	imputed	0.99	G	A	0.33048	0.0021032	0.0059227	0.72251	imputed	0.977	G	A	0.32392	-0.029879	0.0064251	3.31e-06	imputed	0.988	N/A	N/A	N/A	N/A	N/A	N/A	a	g	2.939	0.003292	+-++	a
2	FCP	rs852560	5	10990683	DAP / CTNND2	G	A	0.18911	0.0058294	0.0085792	0.49683	genotyped	1	G	A	0.10047	-0.0082053	0.011974	0.4932	genotyped	1	G	A	0.10132	-0.003219	0.0087918	0.71426	genotyped	1	G	A	0.23981	-0.035077	0.0072425	1.28e-06	genotyped	1	N/A	N/A	N/A	N/A	N/A	N/A	a	g	2.747	0.006011	++-+	a
2	FCP	rs860434	5	11007186	DAP / CTNND2	T	C	0.87515	-0.015463	0.010058	0.12422	genotyped	1	T	C	0.86901	0.00065397	0.010485	0.95027	genotyped	1	T	C	0.87959	0.010178	0.0081721	0.21295	genotyped	1	T	C	0.81791	0.035272	0.0079628	9.44e-06	genotyped	1	N/A	N/A	N/A	N/A	N/A	N/A	t	c	2.347	0.01891	++-+	t
2	FCP	rs17358685	5	22792155	CDH12	G	A	0.79353	-0.039347	0.0081041	1.2e-06	imputed	0.999	G	A	0.89991	-0.0020901	0.01187	0.86023	imputed	0.999	G	A	0.70993	-0.0054732	0.0060807	0.36807	imputed	1	G	A	0.88963	-0.0013768	0.0098632	0.88898	genotyped	1	N/A	N/A	N/A	N/A	N/A	N/A	a	g	2.745	0.006052	++++	a
2	FCP	rs958614	5	22795265	CDH12	C	A	0.20624	0.039324	0.0081018	1.21e-06	genotyped	1	C	A	0.10516	0.0053284	0.01167	0.64796	genotyped	1	C	A	0.29001	0.0054735	0.0060801	0.368	genotyped	1	C	A	0.10998	0.0013696	0.0099218	0.89021	imputed	0.992	N/A	N/A	N/A	N/A	N/A	N/A	a	c	-2.881	0.003961	----	a
2	FCP	rs6595621	5	125017478	LOC644659 / LOC100130551	C	A	0.80477	-0.037829	0.0084049	6.77e-06	genotyped	1	C	A	0.78779	-0.0096336	0.0088523	0.27648	genotyped	1	C	A	0.75881	-0.0034026	0.0063786	0.59373	genotyped	1	C	A	0.92657	0.0026216	0.012033	0.82754	genotyped	1	N/A	N/A	N/A	N/A	N/A	N/A	a	c	2.652	0.007995	+++-	a
2	FCP	rs731376	5	149559192	SLC6A7	N/A	N/A	N/A	N/A	N/A	N/A	N/A	N/A	N/A	N/A	N/A	N/A	N/A	N/A	N/A	N/A	T	A	0.19302	-0.033456	0.0072041	3.42e-06	imputed	0.919	T	A	0.21235	-0.0020235	0.0077424	0.79382	imputed	0.928	N/A	N/A	N/A	N/A	N/A	N/A	a	t	3.579	0.0003454	?+?+	a
2	FCP	rs6579777	5	149561423	SLC6A7	N/A	N/A	N/A	N/A	N/A	N/A	N/A	N/A	C	A	0.13559	0.0064072	0.010389	0.53742	imputed	0.974	C	A	0.2015	-0.030472	0.0068911	9.78e-06	imputed	0.977	C	A	0.22071	-0.0038744	0.0073078	0.596	genotyped	1	N/A	N/A	N/A	N/A	N/A	N/A	a	c	2.686	0.007235	-+?+	a
2	FCP	rs2240794	5	149563529	SLC6A7	T	C	0.19942	-0.012469	0.0087457	0.15394	imputed	0.932	N/A	N/A	N/A	N/A	N/A	N/A	N/A	N/A	T	C	0.20318	-0.03117	0.0069394	7.06e-06	imputed	0.952	T	C	0.22071	-0.0035499	0.0072904	0.62631	genotyped	1	N/A	N/A	N/A	N/A	N/A	N/A	t	c	-3.853	0.0001167	?---	t
2	FCP	rs6926282	6	112968481	LOC643859 / PA2G4P5	G	A	0.952264	0.07326	0.016024	4.83e-06	genotyped	1	G	A	0.86761	0.0098965	0.010412	0.34186	genotyped	1	G	A	0.908223	-0.0036309	0.0095134	0.70271	genotyped	1	N/A	N/A	N/A	N/A	N/A	N/A	genotyped	NA	N/A	N/A	N/A	N/A	N/A	N/A	a	g	-2.592	0.00955	-+-?	a
2	FCP	rs2346528	6	112988546	LOC643859 / PA2G4P5	G	A	0.05708	-0.064628	0.014532	8.69e-06	imputed	0.981	G	A	0.13331	-0.01015	0.010398	0.32897	imputed	0.999	G	A	0.10248	0.006031	0.0091061	0.50778	imputed	0.99	N/A	N/A	N/A	N/A	N/A	N/A	N/A	N/A	N/A	N/A	N/A	N/A	N/A	N/A	a	g	2.362	0.01817	+-+?	a
2	FCP	rs849298	7	106452083	PIK3CG / PRKAR2B	T	A	0.45201	-0.0070706	0.0068005	0.29847	imputed	0.983	T	A	0.17599	0.0034846	0.0096034	0.71672	imputed	0.979	T	A	0.53424	-0.025774	0.0056996	6.13e-06	imputed	0.938	T	A	0.44735	-0.0026687	0.0063308	0.67336	imputed	0.958	N/A	N/A	N/A	N/A	N/A	N/A	a	t	2.996	0.002735	-+++	a
2	FCP	rs2280645	7	108311239	LOC154907	T	G	0.943084	0.020732	0.014649	0.157	genotyped	1	T	G	0.976997	0.067201	0.022987	0.0034627	genotyped	1	T	G	0.918869	0.029931	0.0098512	0.0023788	genotyped	1	T	G	0.86757	0.01232	0.0091549	0.17839	genotyped	1	N/A	N/A	N/A	N/A	N/A	N/A	t	g	4.424	9.7e-06	++++	t
2	FCP	rs850398	7	144761813	LOC643308 / CNTNAP2	G	A	0.40392	0.002762	0.0067061	0.68043	genotyped	1	G	A	0.46103	-0.033374	0.0071634	3.18e-06	genotyped	1	G	A	0.46127	-0.00070233	0.0053806	0.89615	imputed	0.991	G	A	0.27017	-0.010336	0.007038	0.14194	imputed	0.995	N/A	N/A	N/A	N/A	N/A	N/A	a	g	2.94	0.003284	++-+	a
2	FCP	rs9987289	8	9220768	PPP1R3B / LOC100129150	G	A	0.78275	-0.032517	0.0080399	5.24e-05	imputed	0.993	G	A	0.8104	-0.025531	0.0092759	0.0059154	imputed	0.972	G	A	0.924438	-0.017728	0.010294	0.085032	imputed	0.993	G	A	0.971349	-0.0608	0.018339	0.00091553	imputed	0.957	N/A	N/A	N/A	N/A	N/A	N/A	a	g	5.756	8.61e-09	++++	a
2	FCP	rs4841132	8	9221006	PPP1R3B / LOC100129150	G	A	0.7883	-0.034504	0.0080887	1.99e-05	imputed	0.997	G	A	0.87118	-0.03695	0.010688	0.00054569	imputed	0.997	G	A	0.92792	-0.017267	0.010541	0.10139	imputed	0.981	G	A	0.971603	-0.06086	0.018431	0.00095971	imputed	0.965	A	G	0.0896	0.02936	0.007537	0.0001011	a	g	6.144	8.06e-10	++++	a
2	FCP	rs4841133	8	9221074	PPP1R3B / LOC100129150	G	A	0.78268	-0.032505	0.0080402	5.28e-05	imputed	0.993	G	A	0.81012	-0.025478	0.0092805	0.0060457	imputed	0.97	G	A	0.924654	-0.017682	0.01029	0.085738	imputed	0.996	G	A	0.971458	-0.060836	0.018301	0.00088663	imputed	0.964	N/A	N/A	N/A	N/A	N/A	N/A	a	g	5.754	8.7e-09	++++	a
2	FCP	rs4240624	8	9221641	PPP1R3B / LOC100129150	G	A	0.21709	0.032542	0.0080345	5.12e-05	imputed	0.995	G	A	0.18957	0.025573	0.009274	0.0058235	imputed	0.972	G	A	0.07524	0.017705	0.010293	0.085409	imputed	0.998	G	A	0.028608	0.06092	0.018294	0.00086836	imputed	0.962	N/A	N/A	N/A	N/A	N/A	N/A	a	g	-5.768	8.04e-09	----	a
2	FCP	rs10106829	8	9222038	PPP1R3B / LOC100129150	G	A	0.66463	-0.021543	0.0069557	0.0019538	genotyped	1	G	A	0.75542	-0.013484	0.0082284	0.10127	genotyped	1	G	A	0.8025	-0.014612	0.0067175	0.029608	genotyped	1	G	A	0.966469	-0.059499	0.016705	0.00036829	genotyped	1	N/A	N/A	N/A	N/A	N/A	N/A	a	g	5.181	2.21e-07	++++	a
2	FCP	rs6601299	8	9222101	PPP1R3B / LOC100129150	T	C	0.26805	0.031376	0.007488	2.79e-05	imputed	1	T	C	0.13052	0.03535	0.010582	0.00083629	imputed	1	T	C	0.081662	0.012606	0.010019	0.20834	imputed	0.989	T	C	0.029998	0.065738	0.017828	0.00022664	imputed	0.99	N/A	N/A	N/A	N/A	N/A	N/A	t	c	6.042	1.52e-09	++++	t
2	FCP	rs2126260	8	9222491	PPP1R3B / LOC100129150	T	C	0.34029	0.02293	0.0069394	0.00095189	imputed	0.994	T	C	0.26257	0.011245	0.0080424	0.16205	imputed	0.994	T	C	0.19798	0.014636	0.0067159	0.02931	imputed	0.999	T	C	0.037211	0.062358	0.016532	0.00016192	imputed	0.929	N/A	N/A	N/A	N/A	N/A	N/A	t	c	5.263	1.42e-07	++++	t
2	FCP	rs2126259	8	9222556	PPP1R3B / LOC100129150	T	C	0.27295	0.029991	0.0074714	5.97e-05	genotyped	1	T	C	0.18169	0.024158	0.0092353	0.0089008	genotyped	1	T	C	0.085536	0.013097	0.009804	0.18157	genotyped	1	T	C	0.029912	0.065626	0.017725	0.00021355	imputed	0.993	N/A	N/A	N/A	N/A	N/A	N/A	t	c	5.662	1.5e-08	++++	t
2	FCP	rs1461729	8	9224652	PPP1R3B / LOC100129150	G	A	0.72766	-0.031151	0.0074704	3.05e-05	genotyped	1	G	A	0.86901	-0.035573	0.010572	0.0007658	genotyped	1	G	A	0.918382	-0.012617	0.01002	0.20797	imputed	0.99	G	A	0.970289	-0.065627	0.017845	0.00023549	genotyped	1	N/A	N/A	N/A	N/A	N/A	N/A	a	g	6.041	1.54e-09	++++	a
2	FCP	rs7004769	8	9225005	PPP1R3B / LOC100129150	G	A	0.65851	-0.021434	0.0069514	0.0020468	genotyped	1	G	A	0.74648	-0.0092124	0.0080653	0.25336	genotyped	1	G	A	0.80213	-0.014332	0.0067159	0.032839	genotyped	1	G	A	0.962015	-0.063592	0.016457	0.00011144	imputed	0.917	A	G	0.2057	0.02186	0.005338	4.36e-05	a	g	5.065	4.09e-07	++++	a
2	FCP	rs11781511	8	9229833	PPP1R3B / LOC100129150	G	A	0.71909	-0.02821	0.0074417	0.00015014	genotyped	1	G	A	0.82864	-0.019228	0.009424	0.04132	genotyped	1	G	A	0.901615	-0.01044	0.009166	0.2547	genotyped	1	G	A	0.974109	-0.068196	0.019279	0.0004041	genotyped	1	N/A	N/A	N/A	N/A	N/A	N/A	a	g	5.089	3.61e-07	++++	a
2	FCP	rs13265179	8	9232104	PPP1R3B / LOC100129150	C	A	0.73779	-0.026413	0.0075801	0.000493	imputed	0.979	C	A	0.985881	-0.021915	0.029768	0.46161	imputed	0.958	C	A	0.905952	-0.010911	0.0094805	0.24979	imputed	0.988	C	A	0.978806	-0.082567	0.021196	9.8e-05	imputed	0.962	N/A	N/A	N/A	N/A	N/A	N/A	a	c	4.508	6.53e-06	++++	a
2	FCP	rs4332138	8	9237661	PPP1R3B / LOC100129150	T	C	0.28008	0.024334	0.0074668	0.0011184	imputed	0.985	T	C	0.013722	0.020342	0.03025	0.50129	imputed	0.956	T	C	0.097759	0.013046	0.0093075	0.16102	imputed	0.991	T	C	0.02185	0.082219	0.021223	0.00010702	imputed	0.934	N/A	N/A	N/A	N/A	N/A	N/A	t	c	4.508	6.54e-06	++++	t
2	FCP	rs11782386	8	9239197	PPP1R3B / LOC100129150	T	C	0.27882	0.024383	0.0074508	0.0010658	imputed	0.991	T	C	0.013227	0.019781	0.030291	0.51372	imputed	0.99	T	C	0.09758	0.013037	0.0093069	0.16128	imputed	0.993	T	C	0.021261	0.081874	0.021118	0.00010578	imputed	0.959	N/A	N/A	N/A	N/A	N/A	N/A	t	c	4.506	6.62e-06	++++	t
2	FCP	rs2169385	8	9244088	PPP1R3B / LOC100129150	G	A	0.32007	0.022754	0.0071719	0.0015101	genotyped	1	G	A	0.43568	0.021629	0.0071439	0.0024651	genotyped	1	G	A	0.12592	0.011412	0.0081774	0.16285	genotyped	1	G	A	0.039049	0.051316	0.015825	0.0011836	genotyped	1	N/A	N/A	N/A	N/A	N/A	N/A	a	g	-5.298	1.17e-07	----	a
2	FCP	rs6601323	8	9413754	LOC100129150 / TNKS	T	C	0.68509	-0.032678	0.0073818	9.56e-06	imputed	0.989	T	C	0.6192	-0.0053501	0.0073433	0.46627	imputed	0.957	T	C	0.79927	0.0022531	0.006888	0.74359	imputed	0.988	T	C	0.82441	-0.025122	0.0079641	0.001608	imputed	0.991	N/A	N/A	N/A	N/A	N/A	N/A	t	c	-3.707	0.0002098	-+--	t
2	FCP	rs6601324	8	9414067	LOC100129150 / TNKS	G	A	0.68626	-0.032929	0.0074177	9.03e-06	imputed	0.98	G	A	0.62041	-0.0049187	0.0073316	0.50229	imputed	0.952	G	A	0.79965	0.0022506	0.0068982	0.74423	imputed	0.986	G	A	0.82301	-0.024799	0.0079109	0.0017201	genotyped	1	N/A	N/A	N/A	N/A	N/A	N/A	a	g	3.674	0.0002386	+-++	a
2	FCP	rs6985776	8	9416206	LOC100129150 / TNKS	T	C	0.31195	0.033604	0.0074212	5.95e-06	imputed	0.983	T	C	0.3874	0.0049712	0.007187	0.48913	imputed	0.994	T	C	0.20073	-0.002086	0.0069247	0.76323	imputed	0.976	T	C	0.17545	0.025333	0.0079887	0.0015189	imputed	0.981	N/A	N/A	N/A	N/A	N/A	N/A	t	c	3.755	0.0001732	+-++	t
2	FCP	rs4752536	10	123082797	LOC100129699 / FGFR2	G	A	0.80845	-0.0027909	0.0084605	0.74149	genotyped	1	G	A	0.86009	-0.00049303	0.010262	0.96168	genotyped	1	N/A	N/A	N/A	N/A	N/A	N/A	N/A	N/A	G	A	0.56367	0.029097	0.0061144	1.95e-06	genotyped	1	N/A	N/A	N/A	N/A	N/A	N/A	a	g	-2.754	0.00589	+?+-	N/A
2	FCP	rs12146421	10	123084019	LOC100129699 / FGFR2	T	C	0.81834	-0.002634	0.008802	0.76475	imputed	0.99	T	C	0.955116	-0.0018385	0.017092	0.91434	imputed	0.973	T	C	0.6801	0.00082387	0.0057758	0.88657	imputed	0.988	T	C	0.5965	0.029445	0.0062313	2.3e-06	imputed	0.98	N/A	N/A	N/A	N/A	N/A	N/A	t	c	2.337	0.01945	-+-+	t
2	FCP	rs11199915	10	123084349	LOC100129699 / FGFR2	T	C	0.81704	-0.0026236	0.0087333	0.76386	imputed	1	T	C	0.954969	-0.0018924	0.0171	0.91188	imputed	0.97	T	C	0.67802	0.00080999	0.0057396	0.88777	imputed	0.997	T	C	0.59204	0.029184	0.0061674	2.22e-06	imputed	0.998	N/A	N/A	N/A	N/A	N/A	N/A	t	c	2.337	0.01943	-+-+	t
2	FCP	rs11199916	10	123084851	LOC100129699 / FGFR2	C	A	0.18299	0.0026219	0.0087323	0.76398	genotyped	1	C	A	0.059624	0.0087599	0.014713	0.5516	genotyped	1	C	A	0.32268	-0.00083801	0.0057327	0.88378	genotyped	1	C	A	0.40917	-0.02945	0.0061653	1.78e-06	genotyped	1	N/A	N/A	N/A	N/A	N/A	N/A	a	c	2.125	0.03356	-+-+	a
2	FCP	rs7089943	10	123084874	LOC100129699 / FGFR2	N/A	N/A	N/A	N/A	N/A	N/A	N/A	N/A	N/A	N/A	N/A	N/A	N/A	N/A	N/A	N/A	N/A	N/A	N/A	N/A	N/A	N/A	N/A	N/A	G	A	0.43633	-0.029688	0.0061455	1.36e-06	genotyped	1	N/A	N/A	N/A	N/A	N/A	N/A	a	g	4.831	1.36e-06	???+	N/A
2	FCP	rs7913828	10	123085245	LOC100129699 / FGFR2	N/A	N/A	N/A	N/A	N/A	N/A	N/A	N/A	N/A	N/A	N/A	N/A	N/A	N/A	N/A	N/A	G	A	0.66553	0.0007878	0.0058905	0.89361	imputed	0.93	G	A	0.57414	0.029788	0.0062892	2.18e-06	imputed	0.947	N/A	N/A	N/A	N/A	N/A	N/A	a	g	-3.323	0.0008891	?-?-	a
2	FCP	rs10833664	11	21909132	NELL1 / ANO5	G	A	0.52663	-0.020968	0.0066235	0.0015474	imputed	0.997	G	A	0.50977	-0.024789	0.0071205	0.00049883	imputed	0.987	G	A	0.48522	-0.01221	0.0055084	0.026649	imputed	1	G	A	0.65855	-0.0018685	0.0063942	0.77012	imputed	0.995	N/A	N/A	N/A	N/A	N/A	N/A	a	g	4.45	8.58e-06	++++	a
2	FCP	rs10833684	11	21945510	NELL1 / ANO5	G	A	0.65973	0.0183	0.0071575	0.010566	genotyped	1	G	A	0.64507	0.026795	0.0075105	0.00036013	genotyped	1	G	A	0.53965	0.010401	0.0055129	0.059205	genotyped	1	N/A	N/A	N/A	N/A	N/A	N/A	N/A	N/A	N/A	N/A	N/A	N/A	N/A	N/A	a	g	-4.55	5.37e-06	---?	a
2	FCP	rs1088467	12	61565930	PPM1H	A	C	0.973732	-0.096132	0.020966	4.54e-06	imputed	0.966	A	C	0.916035	-0.011049	0.012943	0.39328	imputed	0.93	N/A	N/A	N/A	N/A	N/A	N/A	N/A	N/A	N/A	N/A	N/A	N/A	N/A	N/A	N/A	N/A	N/A	N/A	N/A	N/A	N/A	N/A	a	c	-3.663	0.0002491	-?-?	N/A
2	FCP	rs654228	12	61568609	PPM1H	A	G	0.972923	-0.095865	0.020874	4.38e-06	imputed	0.93	N/A	N/A	N/A	N/A	N/A	N/A	N/A	N/A	N/A	N/A	N/A	N/A	N/A	N/A	N/A	N/A	N/A	N/A	N/A	N/A	N/A	N/A	N/A	N/A	N/A	N/A	N/A	N/A	N/A	N/A	a	g	-4.593	4.38e-06	??-?	N/A
2	FCP	rs5742667	12	101347608	IGF1	N/A	N/A	N/A	N/A	N/A	N/A	N/A	N/A	G	A	0.62964	0.019749	0.0072691	0.0065893	imputed	0.989	G	A	0.717	0.008831	0.0060719	0.14583	imputed	0.996	G	A	0.47664	0.022845	0.0060236	0.00014912	imputed	0.998	N/A	N/A	N/A	N/A	N/A	N/A	a	g	-4.539	5.66e-06	--?-	a
2	FCP	rs9512379	13	26264674	GPR12 / LOC100129306	T	C	0.3782	6.19e-05	0.0068816	0.99282	genotyped	1	T	C	0.35915	0.033153	0.0073861	7.17e-06	genotyped	1	N/A	N/A	N/A	N/A	N/A	N/A	N/A	N/A	N/A	N/A	N/A	N/A	N/A	N/A	N/A	N/A	N/A	N/A	N/A	N/A	N/A	N/A	t	c	3.382	0.0007184	+?+?	N/A
2	FCP	rs4421848	13	26267683	GPR12 / LOC100129306	T	C	0.68115	0.0018145	0.0071662	0.80012	genotyped	1	T	C	0.70939	-0.036284	0.0077604	2.93e-06	genotyped	1	T	C	0.57673	-0.0062326	0.0054737	0.25485	genotyped	1	T	C	0.52886	-0.0064222	0.0061603	0.29717	genotyped	1	N/A	N/A	N/A	N/A	N/A	N/A	t	c	-3.356	0.0007915	--+-	t
2	FCP	rs10507734	13	65831213	PCDH9	N/A	N/A	N/A	N/A	N/A	N/A	N/A	N/A	G	A	0.78034	0.039973	0.0088983	7.05e-06	imputed	0.93	N/A	N/A	N/A	N/A	N/A	N/A	N/A	N/A	N/A	N/A	N/A	N/A	N/A	N/A	N/A	N/A	N/A	N/A	N/A	N/A	N/A	N/A	a	g	-4.492	7.05e-06	-???	N/A
2	FCP	rs10484124	14	83570102	LOC730105 / RNU3P3	C	A	0.80782	-0.017685	0.0085585	0.038799	genotyped	1	C	A	0.934272	-0.033332	0.014384	0.020487	genotyped	1	C	A	0.975912	-0.050787	0.017984	0.0047441	imputed	0.961	C	A	0.75849	-0.011348	0.0070763	0.10879	genotyped	1	N/A	N/A	N/A	N/A	N/A	N/A	a	c	4.42	9.86e-06	++++	a
2	FCP	rs12589592	14	91447555	FBLN5	G	A	0.75459	-0.0022668	0.0078741	0.77344	genotyped	1	G	A	0.89296	-0.053621	0.011544	3.4e-06	genotyped	1	G	A	0.64134	-0.0015998	0.0056037	0.77527	genotyped	1	G	A	0.73794	0.0037113	0.006884	0.5898	imputed	0.966	N/A	N/A	N/A	N/A	N/A	N/A	a	g	2.283	0.02241	+++-	a
2	FCP	rs12101373	15	61667805	USP3	N/A	N/A	N/A	N/A	N/A	N/A	N/A	N/A	C	T	0.986385	-0.13779	0.029792	3.75e-06	genotyped	1	N/A	N/A	N/A	N/A	N/A	N/A	N/A	N/A	N/A	N/A	N/A	N/A	N/A	N/A	N/A	N/A	N/A	N/A	N/A	N/A	N/A	N/A	t	c	4.625	3.75e-06	+???	N/A
2	FCP	rs17660066	18	27232565	DSG4	T	C	0.88303	0.0061451	0.010079	0.54207	imputed	0.999	T	C	0.957771	-0.080457	0.01763	5.03e-06	imputed	0.999	T	C	0.956377	-0.015065	0.013422	0.26168	imputed	0.995	T	C	0.961375	-0.017367	0.015551	0.26408	genotyped	1	N/A	N/A	N/A	N/A	N/A	N/A	t	c	-3.177	0.001489	--+-	t
2	FCP	rs6068383	20	50912212	MRPS33P4 / RPL36P1	C	T	0.8825	-0.0018527	0.010469	0.85953	imputed	0.971	C	T	0.936091	0.0014954	0.014867	0.91988	imputed	0.962	C	T	0.73184	0.030099	0.0063999	2.56e-06	imputed	0.929	N/A	N/A	N/A	N/A	N/A	N/A	N/A	N/A	N/A	N/A	N/A	N/A	N/A	N/A	t	c	-3.016	0.00256	--+?	t
2	FCP	rs2244059	20	50946944	RPL36P1 / TSHZ2	C	A	0.13628	-0.0061506	0.0099856	0.53793	imputed	0.949	C	A	0.20525	0.0061671	0.0089898	0.49271	imputed	0.966	C	A	0.26295	-0.0299	0.0062529	1.74e-06	imputed	0.975	C	A	0.05049	-0.0063294	0.013965	0.65038	imputed	0.959	N/A	N/A	N/A	N/A	N/A	N/A	a	c	2.816	0.004864	-+++	a
2	FCP	rs2244082	20	50947300	RPL36P1 / TSHZ2	T	A	0.15162	-0.0043138	0.0094969	0.64966	imputed	0.974	T	A	0.23443	0.0064143	0.0088041	0.46627	imputed	0.934	T	A	0.26805	-0.030014	0.0061728	1.16e-06	imputed	0.988	T	A	0.085932	-0.0070481	0.010978	0.52086	imputed	0.99	N/A	N/A	N/A	N/A	N/A	N/A	a	t	2.868	0.004136	-+++	a
2	FCP	rs1923113	20	50948028	RPL36P1 / TSHZ2	G	A	0.84522	0.0043237	0.0095169	0.6496	imputed	0.95	G	A	0.76368	-0.0063523	0.0088223	0.47151	imputed	0.924	G	A	0.72957	0.030079	0.0061909	1.18e-06	imputed	0.975	G	A	0.913837	0.007389	0.010934	0.4992	genotyped	1	N/A	N/A	N/A	N/A	N/A	N/A	a	g	-2.887	0.003888	+---	a
2	FCP	rs1923114	20	50948279	RPL36P1 / TSHZ2	T	G	0.15166	-0.0043154	0.0094971	0.64955	imputed	0.974	T	G	0.23477	0.0063665	0.0087998	0.46938	imputed	0.935	T	G	0.26814	-0.029997	0.0061721	1.17e-06	imputed	0.988	T	G	0.085786	-0.0070411	0.010977	0.52125	imputed	0.992	N/A	N/A	N/A	N/A	N/A	N/A	t	g	-2.869	0.004124	+---	t
2	FCP	rs1329834	20	50949867	RPL36P1 / TSHZ2	T	C	0.12287	-0.0073727	0.01053	0.48382	imputed	0.905	T	C	0.06642	-0.0014717	0.01454	0.91937	imputed	0.93	T	C	0.25373	-0.030347	0.0063894	2.04e-06	imputed	0.94	T	C	0.049788	-0.0060407	0.014125	0.66891	imputed	0.952	N/A	N/A	N/A	N/A	N/A	N/A	t	c	-3.207	0.00134	----	t
2	FCP	rs1329835	20	50949945	RPL36P1 / TSHZ2	T	G	0.15168	-0.0043057	0.0094866	0.64992	imputed	0.977	T	G	0.23439	0.0063367	0.0087958	0.47127	imputed	0.938	T	G	0.26808	-0.029985	0.0061708	1.18e-06	imputed	0.988	T	G	0.085821	-0.0070339	0.010982	0.52187	imputed	0.991	N/A	N/A	N/A	N/A	N/A	N/A	t	g	-2.869	0.004119	+---	t
2	FCP	rs1329836	20	50950802	RPL36P1 / TSHZ2	G	A	0.86393	0.0061806	0.0099731	0.53543	imputed	0.952	G	A	0.7947	-0.0061433	0.0089766	0.49374	imputed	0.971	G	A	0.73714	0.029892	0.0062535	1.75e-06	imputed	0.976	G	A	0.949297	0.0064331	0.013984	0.6455	imputed	0.953	N/A	N/A	N/A	N/A	N/A	N/A	a	g	-2.821	0.00479	+---	a
2	FCP	rs2247176	20	50951224	RPL36P1 / TSHZ2	T	C	0.84828	0.0043803	0.009484	0.64418	imputed	0.978	T	C	0.76529	-0.006433	0.0087945	0.46449	imputed	0.938	T	C	0.73199	0.029961	0.0061701	1.2e-06	imputed	0.989	T	C	0.914229	0.0070295	0.010996	0.52266	imputed	0.988	N/A	N/A	N/A	N/A	N/A	N/A	t	c	2.864	0.004178	-+++	t
2	FCP	rs1329837	20	50952299	RPL36P1 / TSHZ2	G	A	0.155	-0.0043049	0.0093976	0.64689	imputed	0.985	N/A	N/A	N/A	N/A	N/A	N/A	N/A	N/A	G	A	0.27032	-0.029642	0.0061356	1.36e-06	imputed	0.999	G	A	0.087044	-0.0070868	0.011118	0.52385	imputed	0.949	N/A	N/A	N/A	N/A	N/A	N/A	a	g	3.681	0.0002325	?+++	a
2	FCP	rs2247273	20	50952389	RPL36P1 / TSHZ2	T	C	0.84455	0.0026559	0.0093542	0.77647	genotyped	1	T	C	0.77136	-0.0055245	0.0086027	0.52076	genotyped	1	T	C	0.72981	0.02965	0.0061339	1.34e-06	genotyped	1	T	C	0.916964	0.0069535	0.011517	0.54599	imputed	0.917	N/A	N/A	N/A	N/A	N/A	N/A	t	c	2.801	0.005092	-+++	t
2	FCP	rs2247388	20	50952647	RPL36P1 / TSHZ2	T	C	0.84445	0.0026566	0.0093558	0.77644	imputed	0.999	T	C	0.7749	-0.0062802	0.0086358	0.46709	imputed	0.995	T	C	0.72971	0.029661	0.0061361	1.34e-06	imputed	0.999	T	C	0.917035	0.0070605	0.011451	0.53752	imputed	0.925	N/A	N/A	N/A	N/A	N/A	N/A	t	c	2.766	0.005673	-+++	t
2	FCP	rs2247515	20	50954041	RPL36P1 / TSHZ2	T	C	0.15552	-0.0026572	0.0093552	0.77639	imputed	0.999	T	C	0.22584	0.0064472	0.0086094	0.45395	imputed	1	T	C	0.27027	-0.029652	0.0061346	1.34e-06	imputed	1	T	C	0.082874	-0.0071972	0.011453	0.52972	imputed	0.925	N/A	N/A	N/A	N/A	N/A	N/A	t	c	-2.761	0.005754	+---	t
2	FCP	rs1923115	20	50954845	RPL36P1 / TSHZ2	T	G	0.15545	-0.0026559	0.0093542	0.77647	genotyped	1	T	G	0.22582	0.0064472	0.0086092	0.45394	genotyped	1	T	G	0.27019	-0.02965	0.0061339	1.34e-06	genotyped	1	T	G	0.082895	-0.0072041	0.011453	0.52934	imputed	0.925	N/A	N/A	N/A	N/A	N/A	N/A	t	g	-2.762	0.005748	+---	t
2	FCP	rs1126372	20	50955578	RPL36P1 / TSHZ2	T	C	0.84455	0.0026561	0.0093543	0.77645	genotyped	1	T	C	0.77371	-0.0061056	0.0086081	0.47815	genotyped	1	T	C	0.72948	0.029692	0.0061388	1.32e-06	imputed	0.998	N/A	N/A	N/A	N/A	N/A	N/A	N/A	N/A	N/A	N/A	N/A	N/A	N/A	N/A	t	c	2.87	0.004103	-++?	t
2	FCP	rs2426450	20	50956658	RPL36P1 / TSHZ2	T	G	0.16141	-0.0041448	0.0093877	0.65884	imputed	0.965	T	G	0.23108	0.0063229	0.0085783	0.46107	imputed	0.99	T	G	0.27596	-0.029669	0.0062595	2.14e-06	imputed	0.943	N/A	N/A	N/A	N/A	N/A	N/A	N/A	N/A	N/A	N/A	N/A	N/A	N/A	N/A	t	g	-2.87	0.004099	+--?	t
2	FCP	rs2247963	20	50957955	RPL36P1 / TSHZ2	C	A	0.16209	-0.0039598	0.0093776	0.67283	imputed	0.964	C	A	0.23137	0.0065192	0.008558	0.4462	imputed	0.991	C	A	0.27787	-0.029442	0.0062427	2.4e-06	imputed	0.947	N/A	N/A	N/A	N/A	N/A	N/A	N/A	N/A	N/A	N/A	N/A	N/A	N/A	N/A	a	c	2.831	0.004635	-++?	a
2	FCP	rs2247974	20	50958223	RPL36P1 / TSHZ2	G	C	0.16202	-0.0039566	0.0093767	0.67306	imputed	0.965	G	C	0.23146	0.0065302	0.0085592	0.4455	imputed	0.99	G	C	0.27794	-0.029427	0.006242	2.43e-06	imputed	0.947	N/A	N/A	N/A	N/A	N/A	N/A	N/A	N/A	N/A	N/A	N/A	N/A	N/A	N/A	c	g	2.829	0.004665	-++?	c
2	FCP	rs2248084	20	50958627	RPL36P1 / TSHZ2	T	C	0.83774	0.0040023	0.0093986	0.67023	imputed	0.957	T	C	0.76872	-0.0065524	0.0085595	0.44397	imputed	0.99	T	C	0.72195	0.029437	0.0062456	2.44e-06	imputed	0.945	N/A	N/A	N/A	N/A	N/A	N/A	N/A	N/A	N/A	N/A	N/A	N/A	N/A	N/A	t	c	2.829	0.004669	-++?	t
2	FCP	rs746064	21	41503318	BACE2	G	A	0.72766	0.021005	0.0072503	0.003766	genotyped	1	G	A	0.51408	0.010023	0.007039	0.15446	genotyped	1	G	A	0.60794	0.0094243	0.0053957	0.080702	genotyped	1	G	A	0.909168	0.036439	0.010787	0.0007303	genotyped	1	N/A	N/A	N/A	N/A	N/A	N/A	a	g	-4.657	3.21e-06	----	a
2	FCP	rs2410406	21	41503399	BACE2	C	A	0.24413	-0.023229	0.0076442	0.0023755	genotyped	0.999	C	A	0.72004	-0.011884	0.0078748	0.13126	genotyped	0.999	C	A	0.31508	-0.010965	0.005741	0.056136	imputed	0.989	C	A	0.075127	-0.034838	0.011702	0.0029107	genotyped	1	N/A	N/A	N/A	N/A	N/A	N/A	a	c	4.643	3.43e-06	++++	a
2	FCP	rs1077339	21	41503445	BACE2	G	A	0.22308	-0.022718	0.0078045	0.0036047	imputed	0.998	G	A	0.47531	-0.011098	0.0071622	0.12124	imputed	0.963	G	A	0.31166	-0.011934	0.0057519	0.037998	imputed	1	G	A	0.073792	-0.034114	0.011811	0.0038738	imputed	0.995	N/A	N/A	N/A	N/A	N/A	N/A	a	g	4.654	3.26e-06	++++	a
2	FCP	rs737288	21	41503507	BACE2	T	G	0.23606	-0.023615	0.0077055	0.0021789	imputed	0.998	T	G	0.60326	-0.0097695	0.007413	0.18754	imputed	0.976	T	G	0.31294	-0.011754	0.0057528	0.041026	imputed	0.996	T	G	0.073948	-0.03379	0.011806	0.0042082	imputed	0.992	T	G	0.3005	-0.02236	0.004814	3.63e-06	t	g	-4.575	4.76e-06	----	t
2	FCP	rs737287	21	41503573	BACE2	T	C	0.23614	-0.023624	0.007708	0.0021779	imputed	0.997	T	C	0.60543	-0.0094388	0.0074311	0.20402	imputed	0.966	T	C	0.31293	-0.011728	0.005752	0.041462	imputed	0.996	T	C	0.07343	-0.033784	0.011805	0.0042124	genotyped	1	N/A	N/A	N/A	N/A	N/A	N/A	t	c	-4.549	5.38e-06	----	t
2	FCP	rs914178	21	41504057	BACE2	G	A	0.77417	0.022421	0.0077664	0.0038899	genotyped	1	G	A	0.43192	0.015117	0.0071584	0.034699	genotyped	1	G	A	0.68762	0.011322	0.0057445	0.048741	genotyped	1	G	A	0.9256	0.03327	0.011753	0.0046453	imputed	0.998	N/A	N/A	N/A	N/A	N/A	N/A	a	g	-4.832	1.35e-06	----	a
2	FCP	rs914179	21	41504252	BACE2	T	C	0.22561	-0.022467	0.0077722	0.003844	imputed	0.999	T	C	0.56808	-0.015119	0.007159	0.034691	imputed	1	T	C	0.31255	-0.011329	0.0057461	0.048657	imputed	0.999	T	C	0.0744	-0.033269	0.011753	0.0046462	imputed	0.998	N/A	N/A	N/A	N/A	N/A	N/A	t	c	-4.834	1.34e-06	----	t
2	FCP	rs914180	21	41504294	BACE2	T	C	0.22561	-0.022467	0.0077722	0.0038442	imputed	0.999	T	C	0.56806	-0.015122	0.0071593	0.034664	imputed	1	T	C	0.3125	-0.011323	0.0057455	0.048753	imputed	0.999	T	C	0.074496	-0.033267	0.011755	0.0046534	imputed	0.997	N/A	N/A	N/A	N/A	N/A	N/A	t	c	-4.834	1.34e-06	----	t
2	FCP	rs914181	21	41504622	BACE2	G	A	0.22321	-0.022702	0.0078021	0.0036169	imputed	0.999	G	A	0.46591	-0.012361	0.0071328	0.08311	imputed	0.995	G	A	0.31165	-0.011937	0.0057517	0.037957	imputed	1	G	A	0.073494	-0.033773	0.011804	0.004223	imputed	0.999	N/A	N/A	N/A	N/A	N/A	N/A	a	g	4.73	2.25e-06	++++	a
2	FCP	rs914182	21	41504851	BACE2	G	A	0.22328	-0.022714	0.0078057	0.0036157	imputed	0.997	G	A	0.46575	-0.012388	0.0071368	0.082614	imputed	0.994	G	A	0.31165	-0.011934	0.0057518	0.038009	imputed	1	G	A	0.073666	-0.033722	0.011824	0.0043439	imputed	0.994	N/A	N/A	N/A	N/A	N/A	N/A	a	g	4.726	2.29e-06	++++	a
2	FCP	rs6517656	21	41505608	BACE2	G	A	0.83905	0.028261	0.0090266	0.0017429	genotyped	1	G	A	0.20892	0.020857	0.0087146	0.016697	genotyped	1	G	A	0.83407	0.018389	0.0073709	0.012603	genotyped	1	G	A	0.94567	0.032302	0.013723	0.018584	genotyped	1	A	G	0.1608	-0.04022	0.006054	3.89e-11	a	g	-5.12	3.06e-07	----	a
2	FCP	rs6517657	21	41506011	BACE2	T	C	0.12903	-0.03125	0.0099388	0.0016655	imputed	0.982	T	C	0.28232	-0.010511	0.0082105	0.20047	imputed	0.929	T	C	0.1568	-0.019191	0.0076443	0.012056	imputed	0.957	T	C	0.049546	-0.040049	0.014549	0.0059127	imputed	0.98	N/A	N/A	N/A	N/A	N/A	N/A	t	c	-4.794	1.64e-06	----	t
2	FCP	rs13052926	21	41506958	BACE2	G	A	0.13036	-0.031145	0.0098302	0.0015334	genotyped	1	G	A	0.29672	-0.0097904	0.0078336	0.21137	genotyped	1	G	A	0.15835	-0.01914	0.0075958	0.011742	imputed	0.965	G	A	0.050085	-0.039419	0.014338	0.0059743	genotyped	1	N/A	N/A	N/A	N/A	N/A	N/A	a	g	4.793	1.65e-06	++++	a
2	FPG	rs4920399	1	18154505	ACTL8 / IGSF21	N/A	N/A	N/A	N/A	N/A	N/A	N/A	N/A	T	A	0.84565	0.0020001	0.0015669	0.20179	imputed	0.942	T	A	0.83081	-0.00044183	0.0017117	0.79631	imputed	0.901	T	A	0.8606	-0.0085928	0.0019269	8.22e-06	imputed	0.986	N/A	N/A	N/A	N/A	N/A	N/A	a	t	2.007	0.04476	-+?+	a
2	FPG	rs11203247	1	18157845	ACTL8 / IGSF21	G	A	0.24357	0.0039235	0.0020647	0.057394	genotyped	1	G	A	0.15953	-0.0018207	0.0015181	0.23041	genotyped	1	G	A	0.1902	0.00038573	0.0015684	0.80573	genotyped	1	G	A	0.13031	0.009463	0.0019684	1.53e-06	genotyped	1	N/A	N/A	N/A	N/A	N/A	N/A	a	g	-2.839	0.004529	+---	a
2	FPG	rs12401888	1	75740366	SLC44A5	T	C	0.19706	-0.0028839	0.0021518	0.18017	genotyped	1	T	C	0.025116	-0.0020404	0.003426	0.55147	genotyped	1	T	C	0.11631	-0.0094366	0.0019606	1.49e-06	genotyped	1	T	C	0.027165	-0.0013557	0.0040875	0.74013	genotyped	1	T	C	0.1337	-0.0007622	0.001494	0.6101	t	c	-3.711	0.0002067	----	t
2	FPG	rs6537816	1	114552428	SYT6 / MRP63P1	G	A	0.78274	0.00027589	0.0021063	0.89579	genotyped	1	G	A	0.55628	0.004887	0.0010809	6.15e-06	genotyped	1	G	A	0.79751	-0.0020545	0.0016026	0.19986	imputed	0.907	G	A	0.7292	-0.0018774	0.001463	0.1994	genotyped	1	N/A	N/A	N/A	N/A	N/A	N/A	a	g	-0.909	0.3635	-+-+	a
2	FPG	rs2239613	1	166550951	TBX19 / LOC441914	G	A	0.51854	0.0061754	0.0017451	0.00040208	imputed	0.961	G	A	0.56022	0.001769	0.0011292	0.11719	imputed	0.958	G	A	0.45156	0.0026552	0.0012613	0.035278	imputed	0.98	G	A	0.39295	0.0026141	0.0013236	0.048265	imputed	0.999	N/A	N/A	N/A	N/A	N/A	N/A	a	g	-4.476	7.61e-06	----	a
2	FPG	rs10753772	1	166561768	TBX19 / LOC441914	G	A	0.53962	-0.0061459	0.0017413	0.00041631	imputed	0.966	N/A	N/A	N/A	N/A	N/A	N/A	N/A	N/A	G	A	0.63671	-0.0037834	0.0013094	0.0038602	imputed	0.977	G	A	0.73359	-0.002836	0.0014779	0.054991	imputed	0.986	N/A	N/A	N/A	N/A	N/A	N/A	a	g	4.718	2.38e-06	?+++	a
2	FPG	rs10800353	1	166561827	TBX19 / LOC441914	T	C	0.46117	0.0061502	0.0017425	0.00041633	imputed	0.964	N/A	N/A	N/A	N/A	N/A	N/A	N/A	N/A	T	C	0.36387	0.0037901	0.0013096	0.0038032	imputed	0.977	T	C	0.27018	0.0029004	0.0014891	0.051446	imputed	0.967	N/A	N/A	N/A	N/A	N/A	N/A	t	c	4.738	2.16e-06	?+++	t
2	FPG	rs982702	1	166563060	TBX19 / LOC441914	T	C	0.46712	0.0062505	0.0017482	0.00034966	imputed	0.963	N/A	N/A	N/A	N/A	N/A	N/A	N/A	N/A	T	C	0.37675	0.0037501	0.0012992	0.0038964	imputed	0.981	T	C	0.26603	0.0029158	0.0014806	0.048926	imputed	0.983	N/A	N/A	N/A	N/A	N/A	N/A	t	c	4.769	1.85e-06	?+++	t
2	FPG	rs1005423	1	166564075	TBX19 / LOC441914	T	C	0.53244	-0.0062424	0.0017251	0.00029624	genotyped	1	T	C	0.57767	-0.0020831	0.0011117	0.060968	genotyped	1	T	C	0.62363	-0.0036804	0.0012885	0.0042857	genotyped	1	T	C	0.73452	-0.0030072	0.0014775	0.041816	imputed	0.989	C	T	0.3791	0.0007487	0.001046	0.474	t	c	-5.109	3.24e-07	----	t
2	FPG	rs6674077	1	166566102	TBX19 / LOC441914	T	C	0.53217	-0.0062291	0.0017275	0.00031106	imputed	0.996	T	C	0.57681	-0.0020619	0.0011158	0.064614	imputed	0.993	T	C	0.62347	-0.0036823	0.0012893	0.0042906	imputed	0.998	T	C	0.73409	-0.0030374	0.0014763	0.039638	imputed	0.991	N/A	N/A	N/A	N/A	N/A	N/A	t	c	-5.102	3.36e-07	----	t
2	FPG	rs2179184	1	166566699	TBX19 / LOC441914	G	A	0.53978	-0.0058939	0.0017002	0.00052706	genotyped	1	G	A	0.54744	-0.0013868	0.0011189	0.2152	genotyped	1	G	A	0.63679	-0.0037038	0.0012976	0.0043122	genotyped	1	G	A	0.73345	-0.0031048	0.001468	0.034435	genotyped	1	N/A	N/A	N/A	N/A	N/A	N/A	a	g	4.772	1.83e-06	++++	a
2	FPG	rs1040412	1	166567346	TBX19 / LOC441914	C	A	0.46739	0.0062552	0.0017293	0.00029789	imputed	0.995	C	A	0.42832	0.0020469	0.0011359	0.071554	imputed	0.961	C	A	0.37613	0.0036956	0.0012906	0.0041913	imputed	0.996	C	A	0.26698	0.0031414	0.0014681	0.032379	genotyped	1	N/A	N/A	N/A	N/A	N/A	N/A	a	c	-5.131	2.88e-07	----	a
2	FPG	rs2103570	1	166569599	TBX19 / LOC441914	G	C	0.54775	-0.0059762	0.0017234	0.00052508	imputed	0.98	G	C	0.58825	-0.0020451	0.0011498	0.075301	imputed	0.94	G	C	0.63614	-0.0037591	0.0013212	0.004438	imputed	0.96	G	C	0.73488	-0.003051	0.0014827	0.039617	imputed	0.985	N/A	N/A	N/A	N/A	N/A	N/A	c	g	5.003	5.65e-07	++++	c
2	FPG	rs6685637	1	166569971	TBX19 / LOC441914	G	A	0.43644	0.0059499	0.0017671	0.00075979	imputed	0.918	N/A	N/A	N/A	N/A	N/A	N/A	N/A	N/A	G	A	0.35131	0.0038597	0.0013528	0.0043287	imputed	0.931	G	A	0.26545	0.0030506	0.001493	0.041024	imputed	0.97	N/A	N/A	N/A	N/A	N/A	N/A	a	g	-4.689	2.75e-06	?---	a
2	FPG	rs6688030	1	166570167	TBX19 / LOC441914	T	C	0.55402	-0.0060795	0.0017773	0.00062476	imputed	0.902	N/A	N/A	N/A	N/A	N/A	N/A	N/A	N/A	T	C	0.64438	-0.0039211	0.00135	0.0036778	imputed	0.929	T	C	0.73211	-0.0030871	0.0015013	0.039747	imputed	0.955	N/A	N/A	N/A	N/A	N/A	N/A	t	c	-4.756	1.98e-06	?---	t
2	FPG	rs16835894	1	236063217	RYR2	N/A	N/A	N/A	N/A	N/A	N/A	genotyped	NA	T	C	0.042791	0.013462	0.0027449	9.37e-07	genotyped	1	N/A	N/A	N/A	N/A	N/A	N/A	N/A	N/A	T	C	0.050085	8.17e-05	0.0030023	0.97829	genotyped	1	N/A	N/A	N/A	N/A	N/A	N/A	t	c	3.407	0.0006559	+??+	N/A
2	FPG	rs1346608	2	5844370	SOX11 / FLJ30594	T	G	0.20563	-0.0019483	0.0021902	0.37369	genotyped	1	T	G	0.10279	-0.0080472	0.0018216	9.98e-06	genotyped	1	T	G	0.31309	0.0013425	0.0013523	0.32082	genotyped	1	T	G	0.31359	-0.00051758	0.0014734	0.72537	imputed	0.906	N/A	N/A	N/A	N/A	N/A	N/A	t	g	-2.186	0.02881	-+--	t
2	FPG	rs1260326	2	27584444	GCKR	T	C	0.32987	-0.0066233	0.0018707	0.00039924	genotyped	1	T	C	0.12233	0.00085627	0.0016773	0.6097	genotyped	1	T	C	0.39722	-0.0051757	0.0012546	3.7e-05	genotyped	1	T	C	0.34253	-0.0043117	0.0013657	0.0015934	genotyped	1	T	C	0.4093	-0.004431	0.001048	2.47e-05	t	c	-5.185	2.16e-07	+---	t
2	FPG	rs780094	2	27594741	GCKR	T	C	0.33476	-0.0056887	0.0018566	0.0021841	genotyped	1	T	C	0.17953	0.00032306	0.0014482	0.82348	genotyped	1	T	C	0.38954	-0.0046031	0.0012526	0.0002381	genotyped	1	T	C	0.32258	-0.0038299	0.001403	0.0063388	genotyped	1	N/A	N/A	N/A	N/A	N/A	N/A	t	c	-4.651	3.3e-06	+---	t
2	FPG	rs780093	2	27596107	GCKR	T	C	0.33415	-0.006027	0.0018609	0.0012009	genotyped	1	T	C	0.13302	-0.00059024	0.001605	0.71306	genotyped	1	T	C	0.38893	-0.0046988	0.0012554	0.00018194	imputed	0.998	T	C	0.32461	-0.0039551	0.0014023	0.0047949	genotyped	1	N/A	N/A	N/A	N/A	N/A	N/A	t	c	-5.102	3.37e-07	----	t
2	FPG	rs780092	2	27596658	GCKR	G	A	0.10832	0.0038078	0.002792	0.17262	genotyped	1	G	A	0.21953	0.00064968	0.0013055	0.61873	genotyped	1	G	A	0.16789	0.0057652	0.001663	0.0005267	genotyped	1	G	A	0.4062	0.0035461	0.0013232	0.0073641	genotyped	1	G	A	0.1639	0.003095	0.00137	0.02398	a	g	-4.135	3.55e-05	----	a
2	FPG	rs1260333	2	27602128	GCKR / LOC100130981	G	A	0.63319	0.0054115	0.0018104	0.0027981	imputed	0.987	G	A	0.61595	0.00068825	0.0011469	0.54844	genotyped	0.914	G	A	0.55122	0.0046904	0.0012395	0.00015425	genotyped	1	G	A	0.67312	0.0036034	0.0014227	0.011317	imputed	0.967	A	G	0.4454	-0.003714	0.001029	0.000315	a	g	-4.983	6.25e-07	----	a
2	FPG	rs2911711	2	27604050	GCKR / LOC100130981	T	A	0.36697	-0.0053655	0.0018091	0.0030188	imputed	0.988	T	A	0.38456	-0.00073846	0.0011471	0.51975	imputed	0.915	T	A	0.44879	-0.004707	0.0012399	0.0001469	imputed	1	T	A	0.32679	-0.0036061	0.0014229	0.011265	imputed	0.966	N/A	N/A	N/A	N/A	N/A	N/A	a	t	5.003	5.66e-07	++++	a
2	FPG	rs1448225	2	32823957	TTC27	T	C	0.65851	-0.0081296	0.0018211	8.04e-06	genotyped	1	T	C	0.83163	0.0032152	0.0014466	0.026245	genotyped	1	T	C	0.59181	-0.0021858	0.0012347	0.076686	genotyped	1	T	C	0.6371	-0.00014524	0.0013755	0.91591	genotyped	1	N/A	N/A	N/A	N/A	N/A	N/A	t	c	-1.859	0.06309	+---	t
2	FPG	rs17498401	2	32847983	TTC27	T	A	0.66726	-0.0080992	0.00182	8.59e-06	imputed	0.996	T	A	0.83139	0.0024124	0.0014485	0.095833	imputed	0.997	T	A	0.5981	-0.0024166	0.0012502	0.05324	imputed	0.994	T	A	0.61802	-0.0013079	0.0013593	0.33594	imputed	0.991	N/A	N/A	N/A	N/A	N/A	N/A	a	t	2.659	0.007849	-+++	a
2	FPG	rs10192659	2	32853027	TTC27	T	C	0.66512	-0.0081126	0.0018195	8.24e-06	imputed	0.99	T	C	0.80754	0.0031963	0.0014344	0.025857	imputed	0.927	T	C	0.60393	-0.0022229	0.0012581	0.077247	imputed	0.99	T	C	0.61843	-0.0011718	0.0013524	0.38623	genotyped	1	N/A	N/A	N/A	N/A	N/A	N/A	t	c	-2.244	0.02486	+---	t
2	FPG	rs220652	2	32861496	TTC27	T	G	0.33325	0.0080946	0.0018171	8.4e-06	imputed	0.998	T	G	0.18352	-0.0030769	0.0014198	0.030228	imputed	0.987	T	G	0.39609	0.0021693	0.0012583	0.084703	imputed	0.989	T	G	0.38269	0.0012154	0.0013606	0.3717	imputed	0.994	N/A	N/A	N/A	N/A	N/A	N/A	t	g	2.262	0.02369	-+++	t
2	FPG	rs220654	2	32865025	TTC27	G	A	0.33148	0.0082867	0.0018242	5.55e-06	imputed	0.999	G	A	0.16806	-0.0025366	0.0014545	0.08117	imputed	0.994	G	A	0.39982	0.0018987	0.0012493	0.12857	imputed	0.994	G	A	0.38229	0.0011945	0.0013589	0.37941	imputed	0.995	N/A	N/A	N/A	N/A	N/A	N/A	a	g	-2.387	0.01697	+---	a
2	FPG	rs1125948	2	32882080	TTC27	G	A	0.65789	-0.0081804	0.0017981	5.38e-06	genotyped	1	G	A	0.83209	0.0033848	0.0014568	0.020155	genotyped	1	G	A	0.60205	-0.0019123	0.0012463	0.12495	imputed	0.994	G	A	0.57317	0.00050541	0.0013533	0.70881	imputed	0.974	N/A	N/A	N/A	N/A	N/A	N/A	a	g	1.468	0.1422	-++-	a
2	FPG	rs9308929	2	32884862	TTC27	G	A	0.54712	-0.0079116	0.0017459	5.85e-06	genotyped	1	G	A	0.30279	-0.0001007	0.0011594	0.93079	genotyped	1	G	A	0.48135	-0.0015089	0.0012292	0.21963	genotyped	1	G	A	0.52589	0.00063405	0.0012962	0.62473	genotyped	1	N/A	N/A	N/A	N/A	N/A	N/A	a	g	2.417	0.01567	+++-	a
2	FPG	rs3769567	2	32887561	TTC27	C	A	0.64688	-0.0086289	0.0017958	1.55e-06	genotyped	1	C	A	0.76279	0.0027211	0.0012673	0.031784	genotyped	1	C	A	0.57462	-0.0018123	0.0012324	0.14141	genotyped	1	C	A	0.5747	0.00025619	0.0013393	0.84831	genotyped	1	N/A	N/A	N/A	N/A	N/A	N/A	a	c	1.723	0.08494	-++-	a
2	FPG	rs927088	2	32890721	TTC27	G	A	0.32607	0.0089984	0.0018573	1.27e-06	imputed	0.958	N/A	N/A	N/A	N/A	N/A	N/A	N/A	N/A	G	A	0.40515	0.0020974	0.0012498	0.093306	imputed	0.974	G	A	0.40543	-0.00025841	0.001402	0.85377	imputed	0.924	N/A	N/A	N/A	N/A	N/A	N/A	a	g	-3.349	0.0008101	?--+	a
2	FPG	rs3820915	2	32899133	TTC27	G	C	0.34352	0.0085226	0.0018106	2.51e-06	imputed	0.986	G	C	0.1498	-0.004116	0.0015359	0.0073644	imputed	0.979	G	C	0.40756	0.0020759	0.0012387	0.093748	imputed	0.99	G	C	0.43187	-0.00012956	0.001342	0.92309	imputed	0.986	N/A	N/A	N/A	N/A	N/A	N/A	c	g	-1.581	0.1138	+--+	c
2	FPG	rs4952301	2	32903052	TTC27 / LTBP1	C	A	0.65712	-0.0082593	0.0018161	5.42e-06	imputed	0.974	N/A	N/A	N/A	N/A	N/A	N/A	N/A	N/A	C	A	0.59125	-0.0020837	0.0012392	0.092673	imputed	0.988	C	A	0.56282	0.00032279	0.0013397	0.8096	genotyped	1	N/A	N/A	N/A	N/A	N/A	N/A	a	c	3.172	0.001516	?++-	a
2	FPG	rs7602181	2	32904140	TTC27 / LTBP1	G	A	0.34118	0.0088146	0.0018525	1.95e-06	imputed	0.952	G	A	0.21715	-0.0026277	0.0013283	0.047906	genotyped	0.997	G	A	0.40138	0.0021327	0.0012682	0.092636	imputed	0.95	G	A	0.41893	-0.0005442	0.0013612	0.68931	imputed	0.978	N/A	N/A	N/A	N/A	N/A	N/A	a	g	-1.795	0.07257	+--+	a
2	FPG	rs4952302	2	32905033	TTC27 / LTBP1	G	A	0.33937	0.0081814	0.0018476	9.51e-06	imputed	0.956	N/A	N/A	N/A	N/A	N/A	N/A	N/A	N/A	G	A	0.40656	0.0020613	0.001246	0.098064	imputed	0.978	G	A	0.44482	-0.00032229	0.0013418	0.81018	genotyped	1	N/A	N/A	N/A	N/A	N/A	N/A	a	g	-3.096	0.001964	?--+	a
2	FPG	rs13033415	2	32907786	TTC27 / LTBP1	G	A	0.42391	0.008158	0.0017985	5.74e-06	imputed	0.926	N/A	N/A	N/A	N/A	N/A	N/A	N/A	N/A	N/A	N/A	N/A	N/A	N/A	N/A	N/A	N/A	N/A	N/A	N/A	N/A	N/A	N/A	N/A	N/A	N/A	N/A	N/A	N/A	N/A	N/A	a	g	-4.536	5.74e-06	??-?	N/A
2	FPG	rs10173066	2	32910809	TTC27 / LTBP1	G	C	0.6575	-0.0081306	0.0018086	6.94e-06	imputed	0.986	N/A	N/A	N/A	N/A	N/A	N/A	N/A	N/A	G	C	0.58719	-0.0020557	0.0012363	0.096349	imputed	0.981	G	C	0.44315	-0.00036415	0.0013361	0.7852	genotyped	0.998	N/A	N/A	N/A	N/A	N/A	N/A	c	g	3.438	0.0005866	?+++	c
2	FPG	rs4952272	2	32911045	TTC27 / LTBP1	T	C	0.66078	-0.0079957	0.0018071	9.66e-06	imputed	0.995	T	C	0.83816	0.0037432	0.0015305	0.014458	imputed	0.933	T	C	0.5914	-0.002032	0.0012325	0.099214	imputed	0.995	T	C	0.55688	0.00037841	0.0013357	0.77695	genotyped	1	N/A	N/A	N/A	N/A	N/A	N/A	t	c	-1.464	0.1432	+--+	t
2	FPG	rs6707573	2	32912272	TTC27 / LTBP1	T	C	0.65038	-0.0081637	0.001833	8.44e-06	imputed	0.951	N/A	N/A	N/A	N/A	N/A	N/A	N/A	N/A	T	C	0.57361	-0.0019368	0.0012475	0.12051	imputed	0.958	N/A	N/A	N/A	N/A	N/A	N/A	N/A	N/A	N/A	N/A	N/A	N/A	N/A	N/A	t	c	-3.952	7.74e-05	?--?	t
2	FPG	rs13431652	2	169461661	SPC25 / G6PC2	N/A	N/A	N/A	N/A	N/A	N/A	N/A	N/A	N/A	N/A	N/A	N/A	N/A	N/A	N/A	N/A	T	C	0.70683	0.0075125	0.0014401	1.82e-07	imputed	0.933	N/A	N/A	N/A	N/A	N/A	N/A	N/A	N/A	N/A	N/A	N/A	N/A	N/A	N/A	t	c	5.217	1.82e-07	?+??	t
2	FPG	rs12623237	2	169464304	G6PC2	G	A	0.96022	-0.0018511	0.0045465	0.6839	genotyped	1	N/A	N/A	N/A	N/A	N/A	N/A	genotyped	NA	N/A	N/A	N/A	N/A	N/A	N/A	genotyped	NA	G	A	0.809	0.0081739	0.0016665	9.35e-07	genotyped	1	N/A	N/A	N/A	N/A	N/A	N/A	a	g	-3.508	0.0004508	??+-	N/A
2	FPG	rs1402837	2	169465600	G6PC2	T	C	0.1732	0.0030094	0.002304	0.1915	genotyped	0.998	T	C	0.31535	0.0017757	0.0011721	0.12976	genotyped	1	T	C	0.23217	0.0040527	0.0014544	0.0053275	genotyped	1	T	C	0.34847	0.007167	0.0014042	3.33e-07	genotyped	1	N/A	N/A	N/A	N/A	N/A	N/A	t	c	5.483	4.19e-08	++++	t
2	FPG	rs573225	2	169465787	G6PC2	G	A	0.15606	-0.0071411	0.0023961	0.0028794	genotyped	1	G	A	0.066512	-0.0017601	0.0022008	0.42385	genotyped	1	G	A	0.31163	-0.0074377	0.0013798	7.03e-08	imputed	0.988	G	A	0.064092	-0.00089742	0.0026532	0.73518	genotyped	0.997	N/A	N/A	N/A	N/A	N/A	N/A	a	g	4.839	1.31e-06	++++	a
2	FPG	rs2232316	2	169465808	G6PC2	G	A	0.82838	-0.0063595	0.0023131	0.005971	imputed	0.993	G	A	0.8778	-0.0013571	0.0016527	0.41157	imputed	0.991	G	A	0.89671	-0.0038177	0.002045	0.061925	imputed	0.982	G	A	0.79075	0.0082376	0.0016171	3.51e-07	genotyped	1	N/A	N/A	N/A	N/A	N/A	N/A	a	g	-0.005	0.9963	+++-	a
2	FPG	rs6715133	2	169466393	G6PC2	T	C	0.044676	0.0039738	0.0043132	0.35688	genotyped	1	T	C	0.079535	0.0018914	0.0020409	0.35406	genotyped	1	N/A	N/A	N/A	N/A	N/A	N/A	N/A	N/A	T	C	0.19166	-0.0083608	0.0016699	5.54e-07	imputed	0.992	N/A	N/A	N/A	N/A	N/A	N/A	t	c	-2.078	0.03774	+?+-	N/A
2	FPG	rs560887	2	169471394	G6PC2	T	C	0.13698	-0.0082359	0.0025215	0.00109	genotyped	0.999	T	C	0.040465	-0.0025902	0.0026565	0.32953	genotyped	1	T	C	0.29005	-0.0077588	0.0014084	3.61e-08	genotyped	1	T	C	0.032258	-0.0030563	0.0036216	0.39872	genotyped	1	T	C	0.2909	-0.006071	0.001128	8.2e-08	t	c	-5.374	7.7e-08	----	t
2	FPG	rs3732033	2	169474692	G6PC2	T	C	0.959608	-0.0019261	0.0045149	0.66966	genotyped	1	T	C	0.988837	-0.0039793	0.0052589	0.44924	genotyped	1	N/A	N/A	N/A	N/A	N/A	N/A	N/A	N/A	T	C	0.809	0.0081879	0.0016665	8.96e-07	genotyped	1	N/A	N/A	N/A	N/A	N/A	N/A	t	c	2.376	0.01752	-?-+	N/A
2	FPG	rs563694	2	169482317	G6PC2 / ABCB11	C	A	0.16095	-0.0063237	0.0024021	0.0084727	genotyped	1	C	A	0.094884	0.00079885	0.0018714	0.66948	genotyped	1	C	A	0.34053	-0.0064784	0.0013512	1.63e-06	genotyped	1	C	A	0.042869	-0.00074839	0.0031745	0.81363	genotyped	1	C	A	0.3368	-0.005813	0.00107	6.21e-08	a	c	3.702	0.0002136	-+++	a
2	FPG	rs537183	2	169482892	G6PC2 / ABCB11	T	C	0.83905	0.0063238	0.0024021	0.0084725	genotyped	1	T	C	0.905116	-0.00079885	0.0018714	0.66948	genotyped	1	T	C	0.65949	0.0064784	0.0013512	1.63e-06	imputed	1	T	C	0.957131	0.00074832	0.0031745	0.81364	genotyped	1	N/A	N/A	N/A	N/A	N/A	N/A	t	c	3.702	0.0002137	-+++	t
2	FPG	rs502570	2	169483205	G6PC2 / ABCB11	G	A	0.80044	0.0053032	0.0022056	0.016198	imputed	0.993	N/A	N/A	N/A	N/A	N/A	N/A	N/A	N/A	G	A	0.65597	0.0065464	0.0013553	1.36e-06	imputed	0.974	G	A	0.929115	-0.0029385	0.0025353	0.24644	genotyped	1	N/A	N/A	N/A	N/A	N/A	N/A	a	g	-3.579	0.0003446	?--+	a
2	FPG	rs475612	2	169484992	G6PC2 / ABCB11	T	C	0.20563	-0.0043682	0.0021902	0.046103	genotyped	1	T	C	0.16093	-0.00089007	0.0014643	0.5433	genotyped	1	T	C	0.34895	-0.0064013	0.0013715	3.05e-06	imputed	0.932	T	C	0.062818	0.0017485	0.0026933	0.51621	genotyped	1	N/A	N/A	N/A	N/A	N/A	N/A	t	c	-3.411	0.0006469	---+	t
2	FPG	rs557462	2	169485841	ABCB11	T	C	0.84455	0.0064916	0.0024208	0.0073274	genotyped	1	T	C	0.952558	0.0012715	0.0025956	0.62422	genotyped	1	T	C	0.65509	0.0064382	0.0013645	2.38e-06	imputed	0.954	T	C	0.956706	0.00036523	0.0031615	0.90803	genotyped	1	N/A	N/A	N/A	N/A	N/A	N/A	t	c	4.07	4.69e-05	++++	t
2	FPG	rs486981	2	169490395	ABCB11	G	A	0.79437	0.0040631	0.0021489	0.058655	genotyped	1	G	A	0.83581	-0.0013008	0.001473	0.37719	genotyped	1	G	A	0.65512	0.0065104	0.0013447	1.29e-06	imputed	0.985	G	A	0.938455	-0.0048442	0.0027353	0.076563	genotyped	1	N/A	N/A	N/A	N/A	N/A	N/A	a	g	-2.151	0.03144	+--+	a
2	FPG	rs484066	2	169490727	ABCB11	T	A	0.28091	-0.0027271	0.0020266	0.17841	genotyped	1	T	A	0.42722	-0.00030137	0.00112	0.78786	genotyped	0.991	T	A	0.63621	0.0064747	0.0013289	1.1e-06	genotyped	0.989	T	A	0.65163	-0.0054242	0.0013981	0.00010456	imputed	0.979	N/A	N/A	N/A	N/A	N/A	N/A	a	t	0.005	0.9963	+-++	a
2	FPG	rs483234	2	169490820	ABCB11	T	C	0.53488	0.0028352	0.0018257	0.12045	genotyped	1	T	C	0.951163	0.0075841	0.0024891	0.0023115	genotyped	1	T	C	0.67666	-0.0020778	0.0013268	0.11735	genotyped	1	T	C	0.46774	0.0073959	0.0013473	4.03e-08	genotyped	1	N/A	N/A	N/A	N/A	N/A	N/A	t	c	4.125	3.7e-05	+-++	t
2	FPG	rs569805	2	169491126	ABCB11	N/A	N/A	N/A	N/A	N/A	N/A	N/A	N/A	T	A	0.83581	-0.0013008	0.001473	0.37719	imputed	1	T	A	0.65515	0.0065115	0.0013448	1.29e-06	imputed	0.985	T	A	0.938068	-0.00503	0.0027467	0.067053	imputed	0.993	N/A	N/A	N/A	N/A	N/A	N/A	a	t	-1.449	0.1472	+-?+	a
2	FPG	rs579060	2	169491285	ABCB11	T	G	0.79437	0.0040632	0.0021489	0.058648	genotyped	1	T	G	0.83581	-0.0013008	0.001473	0.37719	genotyped	1	T	G	0.65515	0.0065115	0.0013448	1.29e-06	imputed	0.985	T	G	0.938031	-0.0053636	0.0027277	0.04926	genotyped	1	N/A	N/A	N/A	N/A	N/A	N/A	t	g	2.051	0.04027	-++-	t
2	FPG	rs508506	2	169493201	ABCB11	C	A	0.84132	0.0058325	0.0023802	0.014268	imputed	0.996	C	A	0.901855	0.00045015	0.0018309	0.80579	genotyped	1	C	A	0.65817	0.0063899	0.0013493	2.18e-06	imputed	0.989	C	A	0.96562	-0.002703	0.0036138	0.45448	genotyped	1	N/A	N/A	N/A	N/A	N/A	N/A	a	c	-3.416	0.0006361	---+	a
2	FPG	rs494874	2	169497552	ABCB11	T	C	0.16095	-0.0060403	0.0023691	0.010785	genotyped	1	T	C	0.15535	-0.0023361	0.0015272	0.1261	genotyped	1	T	C	0.34165	-0.0064085	0.0013463	1.94e-06	imputed	0.991	T	C	0.03438	0.002703	0.0036138	0.45448	genotyped	1	N/A	N/A	N/A	N/A	N/A	N/A	t	c	-4.104	4.07e-05	---+	t
2	FPG	rs552976	2	169499684	ABCB11	G	A	0.81151	0.0049146	0.0022427	0.028422	genotyped	1	G	A	0.57767	0.0007683	0.0011496	0.50392	genotyped	1	G	A	0.65326	0.0061026	0.0013332	4.71e-06	genotyped	1	G	A	0.964345	-0.001759	0.003555	0.62074	genotyped	1	N/A	N/A	N/A	N/A	N/A	N/A	a	g	-3.555	0.000378	---+	a
2	FPG	rs853789	2	169509734	ABCB11	N/A	N/A	N/A	N/A	N/A	N/A	N/A	N/A	N/A	N/A	N/A	N/A	N/A	N/A	N/A	N/A	G	A	0.66396	0.006335	0.0013685	3.67e-06	imputed	0.974	G	A	0.962461	0.00035175	0.0034166	0.918	imputed	0.952	N/A	N/A	N/A	N/A	N/A	N/A	a	g	-3.463	0.0005346	?-?-	a
2	FPG	rs853787	2	169510498	ABCB11	T	G	0.82925	0.0045833	0.0023202	0.048228	genotyped	1	T	G	0.85209	4.29e-05	0.0015226	0.97754	genotyped	1	T	G	0.65713	0.006174	0.0013585	5.5e-06	imputed	0.99	T	G	0.960102	0.00085909	0.0032371	0.79071	genotyped	1	N/A	N/A	N/A	N/A	N/A	N/A	t	g	3.521	0.0004301	++++	t
2	FPG	rs853774	2	169521642	ABCB11	G	A	0.53917	0.0039551	0.0018065	0.028566	genotyped	1	G	A	0.953953	0.0032828	0.0025489	0.19777	genotyped	1	G	A	0.67081	-0.00015711	0.0013212	0.90534	genotyped	1	G	A	0.4966	0.0071647	0.0013343	7.89e-08	genotyped	1	N/A	N/A	N/A	N/A	N/A	N/A	a	g	-4.274	1.92e-05	-+--	a
2	FPG	rs6760985	2	170344943	AF357534 / LOC100128621	G	C	0.53864	-0.0029602	0.0017496	0.090669	imputed	1	G	C	0.71102	-0.0003911	0.0012008	0.74466	imputed	0.999	G	C	0.708	-0.00089791	0.001374	0.51343	imputed	0.999	G	C	0.4533	0.0060863	0.0013606	7.7e-06	imputed	0.995	N/A	N/A	N/A	N/A	N/A	N/A	c	g	-1.056	0.291	+++-	c
2	FPG	rs6732226	2	170344984	AF357534 / LOC100128621	G	A	0.46144	0.0029596	0.0017493	0.09067	imputed	1	G	A	0.28886	0.0003947	0.0012005	0.74233	imputed	1	G	A	0.29204	0.00089619	0.001374	0.51423	imputed	0.999	G	A	0.54675	-0.0060841	0.0013609	7.8e-06	imputed	0.995	N/A	N/A	N/A	N/A	N/A	N/A	a	g	1.054	0.292	---+	a
2	FPG	rs1469356	2	170346841	AF357534 / LOC100128621	G	A	0.53839	-0.0029597	0.0017503	0.090852	imputed	0.998	G	A	0.70326	-0.00036357	0.0012154	0.76484	imputed	0.962	G	A	0.7068	-0.00089952	0.0013759	0.51327	imputed	0.993	G	A	0.45298	0.0060322	0.0013621	9.49e-06	imputed	0.994	N/A	N/A	N/A	N/A	N/A	N/A	a	g	-1.046	0.2955	+++-	a
2	FPG	rs7563840	2	170347727	AF357534 / LOC100128621	T	C	0.46051	0.0030302	0.0017482	0.083035	imputed	0.996	T	C	0.28333	0.00040346	0.0012201	0.74089	imputed	0.974	T	C	0.29212	0.00089372	0.0013748	0.51565	imputed	0.998	T	C	0.546	-0.0060248	0.0013608	9.54e-06	imputed	0.994	N/A	N/A	N/A	N/A	N/A	N/A	t	c	-1.014	0.3106	+++-	t
2	FPG	rs1991377	2	170348199	AF357534 / LOC100128621	G	A	0.5394	-0.0030269	0.0017484	0.083409	imputed	0.996	G	A	0.71668	-0.00040356	0.0012202	0.74084	imputed	0.974	G	A	0.70812	-0.00089634	0.0013742	0.51423	imputed	0.999	G	A	0.4548	0.0060443	0.0013641	9.37e-06	imputed	0.99	N/A	N/A	N/A	N/A	N/A	N/A	a	g	-1.015	0.3099	+++-	a
2	FPG	rs2162514	2	170352610	AF357534 / LOC100128621	T	G	0.46051	0.0030405	0.0017482	0.082002	imputed	0.994	T	G	0.2851	0.00047108	0.0012279	0.70124	imputed	0.964	T	G	0.29037	0.00090654	0.0013728	0.50902	imputed	0.995	T	G	0.54445	-0.006203	0.0013658	5.58e-06	imputed	0.992	N/A	N/A	N/A	N/A	N/A	N/A	t	g	-1.038	0.2991	+++-	t
2	FPG	rs10930379	2	170352795	AF357534 / LOC100128621	G	A	0.53986	-0.0030392	0.0017499	0.082425	imputed	0.993	G	A	0.71486	-0.00047541	0.0012286	0.6988	imputed	0.963	G	A	0.71008	-0.00086871	0.0013726	0.52679	imputed	0.996	G	A	0.45554	0.0062036	0.0013659	5.58e-06	imputed	0.992	N/A	N/A	N/A	N/A	N/A	N/A	a	g	-1.053	0.2922	+++-	a
2	FPG	rs9823188	3	174296175	SPATA16	N/A	N/A	N/A	N/A	N/A	N/A	N/A	N/A	A	G	0.987615	-0.023537	0.0050259	2.82e-06	imputed	0.978	N/A	N/A	N/A	N/A	N/A	N/A	N/A	N/A	N/A	N/A	N/A	N/A	N/A	N/A	N/A	N/A	N/A	N/A	N/A	N/A	N/A	N/A	a	g	-4.683	2.82e-06	-???	N/A
2	FPG	rs9822041	3	174301493	SPATA16	N/A	N/A	N/A	N/A	N/A	N/A	N/A	N/A	A	G	0.987613	-0.023523	0.0050228	2.82e-06	imputed	0.978	N/A	N/A	N/A	N/A	N/A	N/A	N/A	N/A	N/A	N/A	N/A	N/A	N/A	N/A	N/A	N/A	N/A	N/A	N/A	N/A	N/A	N/A	a	g	-4.683	2.83e-06	-???	N/A
2	FPG	rs9809764	3	174302347	SPATA16	N/A	N/A	N/A	N/A	N/A	N/A	N/A	N/A	T	C	0.987427	-0.023678	0.0050383	2.61e-06	imputed	0.964	N/A	N/A	N/A	N/A	N/A	N/A	N/A	N/A	N/A	N/A	N/A	N/A	N/A	N/A	N/A	N/A	N/A	N/A	N/A	N/A	N/A	N/A	t	c	-4.7	2.61e-06	-???	N/A
2	FPG	rs16990009	4	34252180	LOC727819	T	G	0.18911	0.0059554	0.0021396	0.0053787	genotyped	1	T	G	0.094809	0.0071837	0.0018522	0.00010508	genotyped	0.999	T	G	0.070435	0.0036237	0.0024042	0.13175	imputed	0.981	T	G	0.090574	0.0021444	0.0022658	0.34395	imputed	0.974	N/A	N/A	N/A	N/A	N/A	N/A	t	g	4.428	9.52e-06	++++	t
2	FPG	rs6824830	4	70520216	UGT2A1	T	C	0.85442	0.0028241	0.00238	0.23539	imputed	0.991	T	C	0.80516	-0.0064415	0.0014261	6.28e-06	genotyped	0.993	T	C	0.77166	0.00097078	0.0014757	0.51065	imputed	0.993	T	C	0.79117	0.00087449	0.0016051	0.58587	genotyped	1	N/A	N/A	N/A	N/A	N/A	N/A	t	c	-1.068	0.2854	-+++	t
2	FPG	rs17727202	5	4408708	IRX1 / LOC340094	T	C	0.958384	0.0021334	0.004254	0.61601	genotyped	1	T	C	0.920465	0.00041588	0.0020279	0.83751	genotyped	1	T	C	0.914045	0.010227	0.0022364	4.81e-06	genotyped	1	N/A	N/A	N/A	N/A	N/A	N/A	genotyped	NA	C	T	0.08352	-0.0005663	0.001849	0.7594	t	c	3.331	0.0008666	+++?	t
2	FPG	rs10512725	5	4411951	IRX1 / LOC340094	G	C	0.957078	0.0020308	0.0042376	0.63177	imputed	0.971	G	C	0.920772	0.00041967	0.0020381	0.83686	imputed	0.994	G	C	0.913834	0.010125	0.0022392	6.14e-06	imputed	0.995	N/A	N/A	N/A	N/A	N/A	N/A	N/A	N/A	N/A	N/A	N/A	N/A	N/A	N/A	c	g	-3.287	0.001014	---?	c
2	FPG	rs17727542	5	4422807	IRX1 / LOC340094	A	C	0.961607	0.0025474	0.0044206	0.56444	imputed	0.988	N/A	N/A	N/A	N/A	N/A	N/A	N/A	N/A	A	C	0.914009	0.010315	0.0022712	5.58e-06	imputed	0.972	N/A	N/A	N/A	N/A	N/A	N/A	N/A	N/A	N/A	N/A	N/A	N/A	N/A	N/A	a	c	3.946	7.96e-05	?++?	a
2	FPG	rs13177593	5	10889308	DAP / CTNND2	T	C	0.68788	0.0089625	0.0018544	1.34e-06	genotyped	1	T	C	0.88093	0.0011495	0.0017057	0.50039	genotyped	1	T	C	0.61997	-0.0018823	0.0012776	0.14067	genotyped	1	N/A	N/A	N/A	N/A	N/A	N/A	N/A	N/A	N/A	N/A	N/A	N/A	N/A	N/A	t	c	1.853	0.06392	+-+?	t
2	FPG	rs13159908	5	10891358	DAP / CTNND2	T	C	0.6879	0.008986	0.0018617	1.39e-06	imputed	0.989	T	C	0.88084	0.0011541	0.0017071	0.49902	imputed	0.996	T	C	0.62023	-0.0018666	0.0012786	0.14433	imputed	0.997	N/A	N/A	N/A	N/A	N/A	N/A	N/A	N/A	N/A	N/A	N/A	N/A	N/A	N/A	t	c	1.86	0.06295	+-+?	t
2	FPG	rs3763073	5	90155049	GPR98	T	C	0.022644	-0.0073041	0.0059169	0.21704	genotyped	1	N/A	N/A	N/A	N/A	N/A	N/A	genotyped	NA	T	C	0.014224	-0.0020467	0.0051972	0.69371	imputed	0.963	T	C	0.2691	0.0068131	0.0014814	4.24e-06	genotyped	1	N/A	N/A	N/A	N/A	N/A	N/A	t	c	1.863	0.0625	?--+	t
2	FPG	rs12655900	5	90159941	GPR98	G	C	0.022768	-0.0072454	0.005905	0.21982	imputed	0.991	N/A	N/A	N/A	N/A	N/A	N/A	N/A	N/A	G	C	0.014101	-0.0019662	0.0052154	0.70617	imputed	0.967	G	C	0.27054	0.0070229	0.0014966	2.7e-06	imputed	0.976	N/A	N/A	N/A	N/A	N/A	N/A	c	g	-1.932	0.0533	?++-	c
2	FPG	rs16869163	5	90172864	GPR98	G	A	0.02275	-0.0072504	0.005907	0.21966	imputed	0.991	N/A	N/A	N/A	N/A	N/A	N/A	N/A	N/A	G	A	0.014369	-0.00081167	0.0052023	0.87602	imputed	0.956	G	A	0.27043	0.0070297	0.0014976	2.68e-06	imputed	0.973	N/A	N/A	N/A	N/A	N/A	N/A	a	g	-2.074	0.03807	?++-	a
2	FPG	rs11951463	5	95409343	LOC441097	G	A	0.55998	0.0040296	0.0017756	0.023246	genotyped	1	G	A	0.47721	0.0020012	0.0010719	0.061912	genotyped	1	G	A	0.37405	0.0034773	0.0012792	0.0065617	imputed	0.976	G	A	0.48769	0.0035228	0.0012979	0.0066423	genotyped	1	N/A	N/A	N/A	N/A	N/A	N/A	a	g	-4.8	1.59e-06	----	a
2	FPG	rs17085428	5	95413771	LOC441097	G	A	0.78519	0.0061262	0.0021394	0.0041893	genotyped	1	G	A	0.87256	0.0011378	0.0016042	0.47816	genotyped	1	G	A	0.70154	0.0039636	0.0013583	0.0035221	genotyped	1	G	A	0.66214	0.0045534	0.0013734	0.00091465	genotyped	1	N/A	N/A	N/A	N/A	N/A	N/A	a	g	-4.906	9.3e-07	----	a
2	FPG	rs4538631	5	95431099	LOC441097	T	C	0.2295	-0.0055987	0.0020763	0.0070074	genotyped	1	T	C	0.40419	-0.00073306	0.0010957	0.50347	genotyped	1	T	C	0.30761	-0.0045103	0.0013434	0.00078724	genotyped	1	T	C	0.43175	-0.0036257	0.0013215	0.0060765	imputed	0.98	N/A	N/A	N/A	N/A	N/A	N/A	t	c	-4.764	1.9e-06	----	t
2	FPG	rs4365863	5	95463367	LOC441097	G	A	0.75328	0.0040778	0.0020293	0.04449	imputed	0.947	G	A	0.64222	0.0013016	0.0011975	0.27709	genotyped	0.909	G	A	0.67973	0.0052415	0.0013561	0.00011104	imputed	0.946	G	A	0.56624	0.0036002	0.0013312	0.0068425	imputed	0.962	N/A	N/A	N/A	N/A	N/A	N/A	a	g	-4.936	7.97e-07	----	a
2	FPG	rs4330486	5	95471075	LOC441097	G	C	0.75433	0.0041235	0.0020294	0.042167	imputed	0.953	G	C	0.64342	0.0012877	0.0011997	0.28312	imputed	0.91	G	C	0.68318	0.005371	0.0013503	6.96e-05	imputed	0.962	G	C	0.56633	0.0035091	0.0013331	0.0084829	imputed	0.961	N/A	N/A	N/A	N/A	N/A	N/A	c	g	-4.964	6.9e-07	----	c
2	FPG	rs6875999	5	95496745	LOC441097	G	A	0.24663	-0.003099	0.0020031	0.12185	genotyped	1	G	A	0.45535	-0.00075671	0.001103	0.49267	genotyped	1	G	A	0.31346	-0.0054466	0.0013526	5.66e-05	genotyped	1	G	A	0.42869	-0.0040682	0.0013158	0.0019895	genotyped	1	N/A	N/A	N/A	N/A	N/A	N/A	a	g	4.83	1.37e-06	++++	a
2	FPG	rs4869272	5	95565204	LOC441097	T	C	0.76622	0.0072596	0.0020324	0.00035442	genotyped	1	T	C	0.79953	0.00092542	0.0013771	0.50157	genotyped	1	T	C	0.68544	0.0054062	0.0013582	6.88e-05	genotyped	1	T	C	0.63497	0.0053955	0.001346	6.11e-05	genotyped	1	N/A	N/A	N/A	N/A	N/A	N/A	t	c	6.138	8.34e-10	++++	t
2	FPG	rs4869273	5	95565292	LOC441097	T	C	0.76553	0.0070404	0.0020452	0.00057655	imputed	0.994	T	C	0.77646	0.00077259	0.0013399	0.5642	imputed	0.991	T	C	0.68089	0.0050863	0.0013449	0.00015556	imputed	0.998	T	C	0.63371	0.0051809	0.0013409	0.00011163	imputed	1	N/A	N/A	N/A	N/A	N/A	N/A	t	c	5.851	4.88e-09	++++	t
2	FPG	rs13179048	5	95568482	LOC441097	C	A	0.78178	0.0070052	0.0020843	0.00077661	imputed	0.998	N/A	N/A	N/A	N/A	N/A	N/A	N/A	N/A	C	A	0.69649	0.0053672	0.0013674	8.67e-05	imputed	0.992	C	A	0.64253	0.0055629	0.0013566	4.12e-05	imputed	0.996	N/A	N/A	N/A	N/A	N/A	N/A	a	c	-6.587	4.49e-11	?---	a
2	FPG	rs12186664	5	95655981	LOC441097 / PCSK1	T	A	0.24055	-0.0066937	0.0020296	0.0009738	imputed	0.985	T	A	0.1844	-0.0007906	0.0014285	0.57995	imputed	0.977	T	A	0.32301	-0.0055705	0.0013412	3.28e-05	imputed	0.983	T	A	0.37966	-0.0054844	0.0013542	5.12e-05	imputed	0.982	N/A	N/A	N/A	N/A	N/A	N/A	a	t	6.08	1.2e-09	++++	a
2	FPG	rs17085593	5	95656461	LOC441097 / PCSK1	G	C	0.22933	-0.0073724	0.0020598	0.00034472	imputed	0.985	N/A	N/A	N/A	N/A	N/A	N/A	N/A	N/A	G	C	0.31885	-0.0056025	0.0013438	3.06e-05	imputed	0.998	G	C	0.37557	-0.0056893	0.0013555	2.7e-05	imputed	0.991	G	C	0.3239	-0.004366	0.00109	6.4e-05	c	g	6.907	4.94e-12	?+++	c
2	FPG	rs10040098	5	95700022	LOC441097 / PCSK1	T	C	0.23159	-0.0067374	0.0020854	0.0012343	imputed	0.935	N/A	N/A	N/A	N/A	N/A	N/A	N/A	N/A	T	C	0.29852	-0.0067704	0.0013982	1.28e-06	imputed	0.944	T	C	0.38013	-0.0050272	0.00135	0.00019631	imputed	0.96	N/A	N/A	N/A	N/A	N/A	N/A	t	c	-6.885	5.8e-12	?---	t
2	FPG	rs6863434	5	95721429	LOC441097 / PCSK1	T	C	0.22956	-0.0057532	0.002062	0.0052683	imputed	0.989	T	C	0.31908	-0.00083877	0.0011846	0.47889	imputed	0.97	T	C	0.2968	-0.0063391	0.0013792	4.3e-06	imputed	0.977	T	C	0.38583	-0.0048431	0.0013258	0.0002591	imputed	0.998	N/A	N/A	N/A	N/A	N/A	N/A	t	c	-5.979	2.24e-09	----	t
2	FPG	rs10476552	5	95734888	LOC441097 / PCSK1	T	C	0.77601	0.0061468	0.0020649	0.0029131	genotyped	1	T	C	0.77163	0.0013504	0.001323	0.30739	genotyped	1	T	C	0.70849	0.0066658	0.0013735	1.22e-06	genotyped	1	T	C	0.6146	0.0049265	0.0013248	0.00020038	genotyped	1	N/A	N/A	N/A	N/A	N/A	N/A	t	c	6.39	1.66e-10	++++	t
2	FPG	rs7713317	5	95742478	LOC441097 / PCSK1	G	A	0.2198	-0.006479	0.0021086	0.0021217	imputed	0.996	N/A	N/A	N/A	N/A	N/A	N/A	genotyped	NA	G	A	0.28215	-0.0067794	0.0014192	1.78e-06	imputed	0.959	G	A	0.35141	-0.00504	0.001346	0.00018088	imputed	0.999	N/A	N/A	N/A	N/A	N/A	N/A	a	g	6.777	1.23e-11	?+++	a
2	FPG	rs7722200	5	95743196	LOC441097 / PCSK1	T	C	0.77723	0.006126	0.0020657	0.0030212	genotyped	1	T	C	0.76558	0.0012623	0.0013108	0.33553	genotyped	1	T	C	0.70849	0.0066658	0.0013735	1.22e-06	genotyped	1	T	C	0.61423	0.0047524	0.0013255	0.00033645	imputed	0.998	N/A	N/A	N/A	N/A	N/A	N/A	t	c	6.288	3.22e-10	++++	t
2	FPG	rs10213965	5	95745423	LOC441097 / PCSK1	G	C	0.77722	0.006126	0.0020657	0.0030211	imputed	1	G	C	0.77083	0.0013284	0.0013419	0.32218	imputed	0.969	G	C	0.7118	0.0067648	0.0013894	1.12e-06	imputed	0.984	G	C	0.61505	0.0047694	0.0013278	0.00032831	imputed	0.995	N/A	N/A	N/A	N/A	N/A	N/A	c	g	-6.313	2.74e-10	----	c
2	FPG	rs17085655	5	95745560	LOC441097 / PCSK1	G	A	0.22528	-0.0060654	0.0020573	0.003196	imputed	1	G	A	0.28645	-0.0012557	0.0012245	0.30513	imputed	1	G	A	0.29159	-0.0066526	0.0013741	1.29e-06	imputed	0.998	G	A	0.38589	-0.0047528	0.0013256	0.00033675	imputed	0.998	N/A	N/A	N/A	N/A	N/A	N/A	a	g	6.304	2.89e-10	++++	a
2	FPG	rs17085675	5	95753420	PCSK1	T	A	0.22441	-0.0055952	0.0021057	0.0078785	imputed	0.993	T	A	0.46785	-0.001315	0.001103	0.23318	imputed	0.972	T	A	0.27939	-0.006906	0.0014329	1.44e-06	imputed	0.94	T	A	0.3489	-0.0048585	0.0013505	0.00032129	genotyped	1	N/A	N/A	N/A	N/A	N/A	N/A	a	t	6.256	3.95e-10	++++	a
2	FPG	rs6235	5	95754654	PCSK1	G	C	0.21297	-0.0061423	0.0021177	0.0037263	imputed	1	G	C	0.17561	-0.00054147	0.0014283	0.70462	imputed	0.963	G	C	0.27791	-0.0069279	0.0014354	1.39e-06	imputed	0.94	G	C	0.34867	-0.0048633	0.0013501	0.00031565	imputed	0.999	G	C	0.2723	-0.005581	0.001141	1.08e-06	c	g	5.966	2.43e-09	++++	c
2	FPG	rs6234	5	95754730	PCSK1	G	C	0.7858	0.0060404	0.0021166	0.0043189	genotyped	1	G	C	0.7923	-0.00018955	0.0013538	0.88864	genotyped	0.967	G	C	0.72111	0.0069186	0.0014329	1.38e-06	imputed	0.941	G	C	0.65153	0.0049206	0.0013476	0.0002609	genotyped	1	N/A	N/A	N/A	N/A	N/A	N/A	c	g	-5.717	1.08e-08	+---	c
2	FPG	rs13168460	5	95758325	PCSK1	T	A	0.21297	-0.0061423	0.0021177	0.0037263	imputed	1	T	A	0.17561	-0.00054147	0.0014283	0.70461	imputed	0.963	T	A	0.27791	-0.0069274	0.0014353	1.39e-06	imputed	0.94	T	A	0.34846	-0.0049208	0.0013477	0.00026091	imputed	1	N/A	N/A	N/A	N/A	N/A	N/A	a	t	5.991	2.08e-09	++++	a
2	FPG	rs10515237	5	95777305	PCSK1	G	A	0.21726	-0.0050802	0.0021063	0.015871	genotyped	1	G	A	0.31209	-0.0016457	0.0011773	0.16217	genotyped	1	G	A	0.27725	-0.0057558	0.0013919	3.55e-05	genotyped	1	G	A	0.22199	-0.0030996	0.0015539	0.046065	genotyped	1	N/A	N/A	N/A	N/A	N/A	N/A	a	g	5.046	4.51e-07	++++	a
2	FPG	rs3811951	5	95788233	PCSK1	G	A	0.21757	-0.0054808	0.0021411	0.010475	imputed	0.962	G	A	0.32969	-0.0019271	0.0011671	0.098683	imputed	0.967	G	A	0.27951	-0.0057403	0.0014179	5.16e-05	imputed	0.953	G	A	0.22077	-0.0032814	0.0015833	0.038219	imputed	0.97	N/A	N/A	N/A	N/A	N/A	N/A	a	g	5.226	1.73e-07	++++	a
2	FPG	rs151283	5	122474518	PRDM6	C	A	0.66707	8.15e-05	0.0017998	0.9639	genotyped	1	C	A	0.85907	0.001191	0.001575	0.44953	genotyped	1	C	A	0.72495	0.006138	0.0013638	6.77e-06	genotyped	1	C	A	0.39898	0.0010565	0.0013344	0.42849	genotyped	1	N/A	N/A	N/A	N/A	N/A	N/A	a	c	-3.298	0.0009746	----	a
2	FPG	rs12186848	5	132658108	FSTL4	T	C	0.52676	-0.0010328	0.0017581	0.55691	imputed	0.961	T	C	0.54975	-0.0014739	0.0010991	0.17991	imputed	0.999	T	C	0.72637	0.0062019	0.0013848	7.52e-06	imputed	0.998	T	C	0.35457	0.0041382	0.001393	0.0029714	imputed	0.999	N/A	N/A	N/A	N/A	N/A	N/A	t	c	3.104	0.001907	-+-+	t
2	FPG	rs12187702	5	132658169	FSTL4	T	C	0.37577	0.0022845	0.0017527	0.19244	genotyped	1	T	C	0.44977	0.0014974	0.0010991	0.17309	genotyped	1	T	C	0.2736	-0.0061773	0.001383	7.95e-06	genotyped	1	T	C	0.64262	-0.0041048	0.0013837	0.0030108	genotyped	1	T	C	0.2564	0.0001156	0.001164	0.9209	t	c	-2.778	0.00547	+-+-	t
2	FPG	rs12187721	5	132658496	FSTL4	T	C	0.37329	0.0025699	0.0017626	0.14484	imputed	0.999	T	C	0.37404	0.0025149	0.0011466	0.028288	imputed	0.998	T	C	0.27307	-0.0062249	0.001386	7.08e-06	imputed	0.998	T	C	0.64244	-0.0041175	0.0013846	0.0029403	imputed	0.999	N/A	N/A	N/A	N/A	N/A	N/A	t	c	-2.32	0.02034	+-+-	t
2	FPG	rs1896633	5	132658748	FSTL4	T	C	0.37552	0.0021934	0.0017569	0.21186	imputed	0.998	T	C	0.44992	0.0015005	0.0010995	0.17234	imputed	0.999	T	C	0.27352	-0.0062229	0.0013865	7.18e-06	imputed	0.998	T	C	0.64255	-0.0041185	0.0013844	0.0029308	imputed	0.999	N/A	N/A	N/A	N/A	N/A	N/A	t	c	-2.817	0.004853	+-+-	t
2	FPG	rs3943874	5	132659577	FSTL4	C	A	0.37505	0.0025825	0.0017755	0.1458	imputed	0.984	C	A	0.37473	0.0024669	0.0011498	0.031917	imputed	0.994	C	A	0.27527	-0.0062148	0.0013898	7.75e-06	imputed	0.997	C	A	0.63493	-0.0039273	0.0013781	0.0043745	imputed	0.988	N/A	N/A	N/A	N/A	N/A	N/A	a	c	2.27	0.02318	-+-+	a
2	FPG	rs17518545	5	133225380	FSTL4 / C5orf15	T	G	0.954706	-0.0064511	0.0042868	0.13236	imputed	1	T	G	0.974784	-0.0076704	0.0035416	0.030325	imputed	0.967	T	G	0.954657	-0.0080429	0.0029566	0.0065214	imputed	0.99	T	G	0.919149	-0.0068833	0.0023752	0.0037562	imputed	0.997	N/A	N/A	N/A	N/A	N/A	N/A	t	g	-4.715	2.42e-06	----	t
2	FPG	rs29843	5	151482767	GLRA1 / NMUR2	T	A	0.6332	-0.004587	0.0017833	0.010105	imputed	0.961	T	A	0.66015	-0.0032172	0.0012019	0.0074347	imputed	0.977	T	A	0.40932	-0.0023788	0.0012769	0.06246	imputed	0.967	T	A	0.65316	-0.0026375	0.0013778	0.055584	imputed	0.998	N/A	N/A	N/A	N/A	N/A	N/A	a	t	4.442	8.92e-06	++++	a
2	FPG	rs29842	5	151483717	GLRA1 / NMUR2	T	C	0.62801	-0.0045121	0.0017785	0.011179	imputed	0.952	T	C	0.65979	-0.0032461	0.0012017	0.0069065	imputed	0.978	T	C	0.40902	-0.0023636	0.0012767	0.064117	imputed	0.969	T	C	0.65322	-0.0026507	0.0013778	0.054373	imputed	0.996	N/A	N/A	N/A	N/A	N/A	N/A	t	c	-4.437	9.11e-06	----	t
2	FPG	rs9370836	6	15964598	DTNBP1 / LOC441131	N/A	N/A	N/A	N/A	N/A	N/A	N/A	N/A	N/A	N/A	N/A	N/A	N/A	N/A	genotyped	NA	T	C	0.59844	-0.0029193	0.0012971	0.024402	imputed	0.982	T	C	0.68548	-0.0060366	0.0013853	1.32e-05	genotyped	1	N/A	N/A	N/A	N/A	N/A	N/A	t	c	-4.614	3.95e-06	?-?-	t
2	FPG	rs6455027	6	65898782	LOC727977	N/A	N/A	N/A	N/A	N/A	N/A	N/A	N/A	G	A	0.54186	-0.0049412	0.0011097	8.47e-06	imputed	0.976	G	A	0.71928	-0.0023589	0.0013896	0.089599	imputed	0.923	N/A	N/A	N/A	N/A	N/A	N/A	N/A	N/A	N/A	N/A	N/A	N/A	N/A	N/A	a	g	4.225	2.4e-05	++??	a
2	FPG	rs9353762	6	91524108	MAP3K7 / LOC100129847	G	A	0.5257	-0.00081038	0.0017631	0.64578	genotyped	1	G	A	0.82233	-0.0066821	0.0014325	3.09e-06	genotyped	1	G	A	0.68443	1.4e-05	0.0013734	0.99187	imputed	0.998	G	A	0.68039	0.00055915	0.0013976	0.6891	genotyped	1	N/A	N/A	N/A	N/A	N/A	N/A	a	g	2.282	0.02252	+-+-	a
2	FPG	rs9362782	6	91525318	MAP3K7 / LOC100129847	C	A	0.47448	0.00080763	0.0017666	0.64756	imputed	0.997	C	A	0.17507	0.0068063	0.0014367	2.17e-06	imputed	0.999	C	A	0.31552	-1.65e-05	0.0013732	0.99042	imputed	0.998	C	A	0.31983	-0.00055965	0.0013983	0.68898	imputed	0.999	N/A	N/A	N/A	N/A	N/A	N/A	a	c	-2.315	0.02061	-+-+	a
2	FPG	rs6569613	6	129953698	ARHGAP18	T	C	0.974259	-0.025044	0.0056293	8.64e-06	imputed	0.967	T	C	0.82342	0.00044032	0.0014445	0.76051	imputed	0.976	T	C	0.983225	0.0019153	0.0048723	0.69425	imputed	0.967	T	C	0.942275	-0.00074993	0.0027646	0.78619	genotyped	1	N/A	N/A	N/A	N/A	N/A	N/A	t	c	-1.681	0.09285	++--	t
2	FPG	rs12182968	6	129957707	ARHGAP18	C	A	0.97552	-0.025983	0.0057017	5.19e-06	genotyped	1	C	A	0.82095	0.00040692	0.0014177	0.77409	genotyped	1	N/A	N/A	N/A	N/A	N/A	N/A	N/A	N/A	N/A	N/A	N/A	N/A	N/A	N/A	N/A	N/A	N/A	N/A	N/A	N/A	N/A	N/A	a	c	2.778	0.005466	-?+?	N/A
2	FPG	rs6569616	6	129977129	ARHGAP18	T	C	0.977578	-0.027174	0.0060592	7.3e-06	imputed	0.949	T	C	0.79092	0.0011421	0.001434	0.42581	imputed	0.913	N/A	N/A	N/A	N/A	N/A	N/A	N/A	N/A	T	C	0.934043	-0.0016973	0.0026288	0.51851	imputed	0.956	N/A	N/A	N/A	N/A	N/A	N/A	t	c	-2.242	0.02495	+?--	N/A
2	FPG	rs1281967	6	153487884	RGS17	T	A	0.62625	0.0032372	0.0018179	0.07496	imputed	0.958	T	A	0.62879	0.001953	0.0011287	0.083583	imputed	0.949	T	A	0.52958	0.00386	0.0012539	0.0020809	imputed	0.956	T	A	0.87374	0.0042353	0.0019044	0.026156	imputed	0.987	N/A	N/A	N/A	N/A	N/A	N/A	a	t	-4.47	7.81e-06	----	a
2	FPG	rs2281620	6	154557354	OPRM1	C	A	0.51791	0.0040977	0.0018048	0.023181	imputed	0.965	C	A	0.21667	0.0045369	0.0013774	0.00098817	imputed	0.912	C	A	0.34714	0.0024634	0.0013422	0.066451	imputed	0.965	C	A	0.17863	0.0031523	0.0017224	0.067227	imputed	0.976	N/A	N/A	N/A	N/A	N/A	N/A	a	c	-4.557	5.18e-06	----	a
2	FPG	rs17368843	7	24167343	STK31 / NPY	C	T	0.930404	-0.0012158	0.0034237	0.7225	imputed	0.996	C	T	0.979759	-0.0043721	0.0038873	0.26071	imputed	0.946	C	T	0.89443	-0.0092338	0.00209	9.96e-06	imputed	0.993	N/A	N/A	N/A	N/A	N/A	N/A	N/A	N/A	N/A	N/A	N/A	N/A	N/A	N/A	t	c	3.685	0.0002286	+++?	t
2	FPG	rs12538454	7	24167644	STK31 / NPY	A	T	0.930118	-0.0011755	0.0034223	0.73123	imputed	0.991	A	T	0.979645	-0.0043589	0.0038862	0.26202	imputed	0.94	A	T	0.89443	-0.0092338	0.00209	9.96e-06	imputed	0.993	N/A	N/A	N/A	N/A	N/A	N/A	N/A	N/A	N/A	N/A	N/A	N/A	N/A	N/A	a	t	-3.678	0.0002355	---?	a
2	FPG	rs17368919	7	24168051	STK31 / NPY	T	G	0.930345	-0.0012151	0.0034243	0.7227	imputed	0.995	T	G	0.979733	-0.0043744	0.0038871	0.26044	imputed	0.944	T	G	0.89446	-0.0092332	0.0020899	9.96e-06	imputed	0.993	N/A	N/A	N/A	N/A	N/A	N/A	N/A	N/A	N/A	N/A	N/A	N/A	N/A	N/A	t	g	-3.685	0.0002284	---?	t
2	FPG	rs12534269	7	24175060	STK31 / NPY	T	C	0.929995	-0.0012075	0.003427	0.72458	imputed	0.989	T	C	0.979457	-0.0042496	0.0038621	0.27119	imputed	0.96	T	C	0.89443	-0.0092338	0.00209	9.96e-06	imputed	0.993	N/A	N/A	N/A	N/A	N/A	N/A	N/A	N/A	N/A	N/A	N/A	N/A	N/A	N/A	t	c	-3.67	0.0002428	---?	t
2	FPG	rs17660880	7	24205732	STK31 / NPY	T	C	0.930578	-0.0010172	0.0034341	0.76708	imputed	0.988	N/A	N/A	N/A	N/A	N/A	N/A	N/A	N/A	T	C	0.89329	-0.009188	0.0020759	9.6e-06	imputed	0.998	N/A	N/A	N/A	N/A	N/A	N/A	N/A	N/A	N/A	N/A	N/A	N/A	N/A	N/A	t	c	-3.683	0.0002307	?--?	t
2	FPG	rs2107310	7	24213213	STK31 / NPY	T	C	0.929621	-0.0016224	0.0034027	0.6335	genotyped	1	T	C	0.981395	-0.0032284	0.0040023	0.41988	genotyped	1	T	C	0.89173	-0.0092811	0.0020613	6.71e-06	genotyped	1	N/A	N/A	N/A	N/A	N/A	N/A	N/A	N/A	N/A	N/A	N/A	N/A	N/A	N/A	t	c	-3.618	0.0002967	---?	t
2	FPG	rs2722396	7	24394742	NPY / MPP6	T	C	0.63035	-0.0038282	0.0017729	0.030828	genotyped	1	T	C	0.60512	-0.0017771	0.0011081	0.10878	genotyped	1	T	C	0.48098	-0.0034522	0.0012501	0.005753	genotyped	1	T	C	0.69822	-0.0032919	0.001428	0.021156	genotyped	1	N/A	N/A	N/A	N/A	N/A	N/A	t	c	-4.437	9.14e-06	----	t
2	FPG	rs2040524	7	88494958	ZNF804B	G	A	0.30049	0.002086	0.0018746	0.2658	genotyped	1	G	A	0.22	0.0032821	0.0013192	0.012849	genotyped	1	G	A	0.19861	0.0043133	0.0015627	0.0057782	genotyped	1	G	A	0.24703	0.0035748	0.0015256	0.019118	genotyped	1	N/A	N/A	N/A	N/A	N/A	N/A	a	g	-4.442	8.93e-06	----	a
2	FPG	rs2040525	7	88496056	ZNF804B	G	C	0.7024	-0.0021074	0.0018939	0.26583	imputed	0.984	G	C	0.78452	-0.0033923	0.001351	0.012041	imputed	0.973	G	C	0.80307	-0.0043513	0.0015774	0.0058067	imputed	0.988	G	C	0.75687	-0.0036521	0.0015519	0.018609	imputed	0.979	N/A	N/A	N/A	N/A	N/A	N/A	c	g	4.457	8.31e-06	++++	c
2	FPG	rs13221880	7	110130209	IMMP2L	G	A	0.59228	0.0082501	0.0017384	2.08e-06	imputed	0.994	G	A	0.88571	0.0014012	0.0017544	0.42447	genotyped	0.987	G	A	0.49109	0.00030238	0.0012984	0.81585	imputed	0.939	G	A	0.53325	-0.00083194	0.0013248	0.53001	imputed	0.947	N/A	N/A	N/A	N/A	N/A	N/A	a	g	-2.235	0.0254	---+	a
2	FPG	rs7803158	7	110131060	IMMP2L	C	A	0.40881	-0.0082163	0.0017329	2.12e-06	genotyped	1	C	A	0.11488	-0.0013281	0.0017404	0.44541	genotyped	1	C	A	0.50962	-0.00024257	0.0012998	0.85196	imputed	0.936	C	A	0.53438	3.78e-05	0.001301	0.97684	genotyped	1	N/A	N/A	N/A	N/A	N/A	N/A	a	c	2.499	0.01246	+++-	a
2	FPG	rs11768241	7	110145169	IMMP2L	T	C	0.60797	0.0080921	0.001726	2.76e-06	imputed	0.993	T	C	0.88866	0.0013203	0.0017595	0.45303	imputed	0.993	T	C	0.51316	0.00078798	0.0012816	0.53866	imputed	0.957	T	C	0.47431	0.0001243	0.0013034	0.92403	imputed	0.986	N/A	N/A	N/A	N/A	N/A	N/A	t	c	2.771	0.00558	++++	t
2	FPG	rs10271007	7	115933085	CAV2	N/A	N/A	N/A	N/A	N/A	N/A	N/A	N/A	G	A	0.33387	-0.0054451	0.0012064	6.38e-06	imputed	0.977	G	A	0.49393	-0.0011969	0.0012463	0.33688	imputed	0.994	G	A	0.82561	-0.0029144	0.0017335	0.092727	imputed	0.99	N/A	N/A	N/A	N/A	N/A	N/A	a	g	4.009	6.1e-05	++?+	a
2	FPG	rs2402754	7	124235708	LOC154872 / POT1	T	A	0.66555	0.0019093	0.001844	0.30048	imputed	0.995	T	A	0.68286	0.005437	0.0012214	8.53e-06	imputed	0.986	T	A	0.67455	-0.0010991	0.00135	0.41555	imputed	0.996	T	A	0.7584	-0.0011152	0.0015337	0.46714	imputed	0.999	N/A	N/A	N/A	N/A	N/A	N/A	a	t	-1.809	0.07049	-+-+	a
2	FPG	rs7795610	7	124238764	LOC154872 / POT1	T	C	0.33544	-0.0019224	0.001838	0.2956	imputed	0.999	T	C	0.31718	-0.0055012	0.0012238	6.95e-06	imputed	0.985	T	C	0.32626	0.0010728	0.0013479	0.42608	imputed	0.999	T	C	0.24158	0.0011133	0.0015337	0.4679	imputed	0.999	N/A	N/A	N/A	N/A	N/A	N/A	t	c	-1.846	0.06495	-+-+	t
2	FPG	rs6943797	7	124239380	LOC154872 / POT1	G	A	0.33696	-0.0019446	0.0018431	0.2914	imputed	0.992	G	A	0.32127	-0.0054684	0.0012289	8.59e-06	imputed	0.965	G	A	0.33653	0.0011009	0.0013689	0.42128	imputed	0.953	G	A	0.24676	0.0011094	0.0015448	0.47268	imputed	0.971	N/A	N/A	N/A	N/A	N/A	N/A	a	g	1.827	0.06775	+-+-	a
2	FPG	rs7782296	7	124240337	LOC154872 / POT1	G	A	0.66934	0.0019341	0.0018716	0.30142	imputed	0.974	G	A	0.68136	0.0055627	0.0012198	5.11e-06	imputed	0.986	G	A	0.67365	-0.001062	0.0013508	0.43175	imputed	0.994	G	A	0.75734	-0.0010908	0.0015588	0.48407	imputed	0.97	N/A	N/A	N/A	N/A	N/A	N/A	a	g	-1.891	0.05861	-+-+	a
2	FPG	rs9656320	7	124240385	LOC154872 / POT1	T	A	0.67969	0.0020616	0.0019507	0.29059	imputed	0.917	T	A	0.67809	0.0056343	0.001251	6.68e-06	imputed	0.927	T	A	0.67753	-0.0011019	0.0013699	0.42118	imputed	0.97	T	A	0.76286	-0.0011343	0.0016103	0.48118	imputed	0.924	N/A	N/A	N/A	N/A	N/A	N/A	a	t	-1.861	0.06276	-+-+	a
2	FPG	rs7787804	7	124264418	POT1	G	A	0.66585	0.0018946	0.0018404	0.30328	genotyped	1	G	A	0.68326	0.0055713	0.0012178	4.76e-06	genotyped	1	G	A	0.67593	-0.00091382	0.0013502	0.49854	genotyped	1	G	A	0.75533	-0.00109	0.00153	0.47621	imputed	0.999	N/A	N/A	N/A	N/A	N/A	N/A	a	g	-1.951	0.05107	-+-+	a
2	FPG	rs7794637	7	124274216	POT1	T	C	0.29927	-0.0012165	0.0018789	0.51733	genotyped	1	T	C	0.26233	-0.0059331	0.0012767	3.37e-06	genotyped	1	T	C	0.3237	0.001101	0.0013476	0.41389	genotyped	1	T	C	0.23645	0.0011625	0.0015676	0.45834	imputed	0.974	N/A	N/A	N/A	N/A	N/A	N/A	t	c	-1.73	0.0837	-+-+	t
2	FPG	rs11772420	7	124282375	POT1	T	C	0.3321	-0.0017964	0.001848	0.331	imputed	0.998	T	C	0.26469	-0.0056269	0.0012709	9.53e-06	imputed	1	T	C	0.3241	0.00091411	0.0013503	0.49843	imputed	1	T	C	0.2407	0.0011358	0.0015372	0.45997	imputed	1	N/A	N/A	N/A	N/A	N/A	N/A	t	c	-1.84	0.06577	-+-+	t
2	FPG	rs12706625	7	124312418	POT1	C	A	0.33231	-0.0018117	0.0018481	0.32694	genotyped	1	C	A	0.25907	-0.0057616	0.0012763	6.35e-06	genotyped	1	C	A	0.3248	0.00085841	0.0013486	0.52443	genotyped	1	C	A	0.24065	0.001136	0.0015371	0.45988	imputed	1	N/A	N/A	N/A	N/A	N/A	N/A	a	c	1.909	0.05631	+-+-	a
2	FPG	rs330092	8	9213454	PPP1R3B / LOC100129150	G	A	0.71692	-0.0067807	0.0019469	0.00049608	imputed	0.95	N/A	N/A	N/A	N/A	N/A	N/A	N/A	N/A	N/A	N/A	N/A	N/A	N/A	N/A	N/A	N/A	G	A	0.964346	-0.011519	0.0034694	0.00089935	genotyped	1	N/A	N/A	N/A	N/A	N/A	N/A	a	g	4.78	1.75e-06	??++	N/A
2	FPG	rs983309	8	9215142	PPP1R3B / LOC100129150	T	G	0.23807	0.0078439	0.0020311	0.0001125	genotyped	1	T	G	0.31209	0.0023129	0.0011901	0.051966	genotyped	1	T	G	0.099488	0.0011787	0.0020614	0.56747	genotyped	1	T	G	0.032683	0.01073	0.0036013	0.0028874	genotyped	1	N/A	N/A	N/A	N/A	N/A	N/A	t	g	4.466	7.96e-06	++++	t
2	FPG	rs6984305	8	9215678	PPP1R3B / LOC100129150	T	A	0.77987	-0.0082876	0.0021461	0.00011258	imputed	0.939	N/A	N/A	N/A	N/A	N/A	N/A	N/A	N/A	T	A	0.909796	-0.0022815	0.0022163	0.30329	imputed	0.953	T	A	0.970156	-0.012476	0.0039299	0.0015003	imputed	0.902	N/A	N/A	N/A	N/A	N/A	N/A	a	t	4.439	9.03e-06	?+++	a
2	FPG	rs9987289	8	9220768	PPP1R3B / LOC100129150	G	A	0.78275	-0.0084726	0.0021004	5.49e-05	imputed	0.993	G	A	0.81036	-0.0035781	0.0014448	0.013269	imputed	0.972	G	A	0.923982	-0.0037529	0.0023479	0.10996	imputed	0.993	G	A	0.971349	-0.01394	0.0039481	0.00041442	imputed	0.957	N/A	N/A	N/A	N/A	N/A	N/A	a	g	5.656	1.55e-08	++++	a
2	FPG	rs4841132	8	9221006	PPP1R3B / LOC100129150	G	A	0.7883	-0.0086834	0.0021135	3.98e-05	imputed	0.997	G	A	0.87145	-0.0061586	0.0016549	0.00019806	imputed	0.997	G	A	0.927455	-0.0037868	0.0024065	0.11559	imputed	0.981	G	A	0.971603	-0.014024	0.0039702	0.00041194	imputed	0.965	A	G	0.0896	0.005943	0.001749	0.0006931	a	g	6.288	3.21e-10	++++	a
2	FPG	rs4841133	8	9221074	PPP1R3B / LOC100129150	G	A	0.78268	-0.0084743	0.0021005	5.47e-05	imputed	0.993	G	A	0.81008	-0.0035731	0.0014454	0.013432	imputed	0.97	G	A	0.924198	-0.0037464	0.0023471	0.11045	imputed	0.996	G	A	0.971458	-0.013947	0.0039353	0.00039398	imputed	0.964	N/A	N/A	N/A	N/A	N/A	N/A	a	g	5.66	1.51e-08	++++	a
2	FPG	rs4240624	8	9221641	PPP1R3B / LOC100129150	G	A	0.21709	0.0084273	0.0020986	5.93e-05	imputed	0.995	G	A	0.18961	0.0035883	0.0014449	0.013011	imputed	0.972	G	A	0.075696	0.0037321	0.0023467	0.11176	imputed	0.998	G	A	0.028608	0.013957	0.0039344	0.00038883	imputed	0.962	N/A	N/A	N/A	N/A	N/A	N/A	a	g	-5.656	1.55e-08	----	a
2	FPG	rs10106829	8	9222038	PPP1R3B / LOC100129150	G	A	0.66463	-0.0057817	0.0018174	0.001466	genotyped	1	G	A	0.75491	-0.0045021	0.001276	0.00041832	genotyped	1	G	A	0.80249	-0.0016756	0.0015356	0.27521	genotyped	1	G	A	0.966469	-0.013703	0.0035619	0.00011948	genotyped	1	N/A	N/A	N/A	N/A	N/A	N/A	a	g	5.69	1.27e-08	++++	a
2	FPG	rs6601299	8	9222101	PPP1R3B / LOC100129150	T	C	0.26805	0.0070879	0.0019562	0.00029093	imputed	1	T	C	0.13023	0.0063248	0.0016407	0.00011579	imputed	1	T	C	0.082091	0.0031644	0.0022882	0.16669	imputed	0.989	T	C	0.029998	0.014515	0.0038	0.00013363	imputed	0.99	N/A	N/A	N/A	N/A	N/A	N/A	t	c	6.188	6.1e-10	++++	t
2	FPG	rs2126260	8	9222491	PPP1R3B / LOC100129150	T	C	0.34029	0.0060387	0.0018115	0.00085763	imputed	0.994	T	C	0.26292	0.0048373	0.0012464	0.0001041	imputed	0.994	T	C	0.19798	0.0016761	0.0015353	0.27495	imputed	0.999	T	C	0.037211	0.013749	0.0035177	9.28e-05	imputed	0.929	N/A	N/A	N/A	N/A	N/A	N/A	t	c	5.961	2.51e-09	++++	t
2	FPG	rs2126259	8	9222556	PPP1R3B / LOC100129150	T	C	0.27295	0.007014	0.0019521	0.00032688	genotyped	1	T	C	0.18186	0.004171	0.0014313	0.0035655	genotyped	1	T	C	0.085955	0.0031578	0.0022364	0.15795	genotyped	1	T	C	0.029912	0.014415	0.0037766	0.0001351	imputed	0.993	N/A	N/A	N/A	N/A	N/A	N/A	t	c	5.727	1.02e-08	++++	t
2	FPG	rs1461729	8	9224652	PPP1R3B / LOC100129150	G	A	0.72766	-0.0072698	0.0019519	0.00019563	genotyped	1	G	A	0.8693	-0.0064876	0.0016391	7.56e-05	genotyped	1	G	A	0.917953	-0.003164	0.0022884	0.16679	imputed	0.99	G	A	0.970289	-0.014536	0.0038051	0.00013331	genotyped	1	N/A	N/A	N/A	N/A	N/A	N/A	a	g	6.282	3.34e-10	++++	a
2	FPG	rs7004769	8	9225005	PPP1R3B / LOC100129150	G	A	0.65851	-0.005863	0.0018163	0.0012463	genotyped	1	G	A	0.74605	-0.0040156	0.001251	0.0013273	genotyped	1	G	A	0.80212	-0.0016657	0.0015352	0.27793	genotyped	1	G	A	0.962015	-0.013539	0.0035043	0.00011177	imputed	0.917	A	G	0.2057	0.00403	0.001237	0.001144	a	g	5.558	2.73e-08	++++	a
2	FPG	rs11781511	8	9229833	PPP1R3B / LOC100129150	G	A	0.71909	-0.0063287	0.0019444	0.0011343	genotyped	1	G	A	0.82791	-0.0043705	0.0014547	0.0026613	genotyped	1	G	A	0.901243	-0.0019305	0.002092	0.35612	genotyped	1	G	A	0.974109	-0.012303	0.0041107	0.0027641	genotyped	1	N/A	N/A	N/A	N/A	N/A	N/A	a	g	4.93	8.23e-07	++++	a
2	FPG	rs7834497	8	9261549	LOC100129150	C	T	0.974908	0.0098711	0.005496	0.072485	genotyped	1	C	T	0.81535	0.006173	0.0014413	1.84e-05	genotyped	1	C	T	0.985198	0.012638	0.0052201	0.015481	imputed	0.933	N/A	N/A	N/A	N/A	N/A	N/A	genotyped	NA	N/A	N/A	N/A	N/A	N/A	N/A	t	c	-4.927	8.35e-07	---?	t
2	FPG	rs7011130	8	9263106	LOC100129150	C	T	0.975701	0.010048	0.0056898	0.077402	imputed	0.952	C	T	0.81749	0.0065279	0.0014779	1e-05	imputed	0.966	N/A	N/A	N/A	N/A	N/A	N/A	N/A	N/A	N/A	N/A	N/A	N/A	N/A	N/A	N/A	N/A	N/A	N/A	N/A	N/A	N/A	N/A	t	c	-4.49	7.12e-06	-?-?	N/A
2	FPG	rs10955193	8	100082738	OSR2 / VPS13B	T	C	0.47866	0.0010137	0.0017654	0.56584	imputed	0.951	T	C	0.63551	0.0053746	0.001129	1.93e-06	imputed	0.961	T	C	0.34361	0.0012025	0.0013164	0.361	imputed	0.959	T	C	0.56255	0.00095884	0.0013406	0.47447	imputed	0.972	N/A	N/A	N/A	N/A	N/A	N/A	t	c	3.465	0.00053	++++	t
2	FPG	rs4442113	8	100250047	VPS13B	G	A	0.47797	0.0012878	0.0017401	0.45925	genotyped	1	G	A	0.64977	0.0052059	0.001133	4.33e-06	genotyped	1	G	A	0.3365	0.0014928	0.0013025	0.25178	genotyped	1	G	A	0.55178	0.0012329	0.0013188	0.34989	genotyped	1	N/A	N/A	N/A	N/A	N/A	N/A	a	g	-3.697	0.0002181	----	a
2	FPG	rs10808362	8	100260990	VPS13B	T	A	0.52182	-0.0012846	0.0017535	0.46382	imputed	0.978	T	A	0.35979	-0.0052613	0.0011552	5.25e-06	imputed	0.949	T	A	0.6649	-0.0014162	0.0013051	0.27788	imputed	0.996	T	A	0.44809	-0.0012261	0.0013198	0.35291	imputed	0.999	N/A	N/A	N/A	N/A	N/A	N/A	a	t	3.637	0.0002757	++++	a
2	FPG	rs10097320	8	119606454	SAMD12	T	C	0.60432	0.003304	0.00186	0.075675	imputed	0.939	T	C	0.80014	0.0048601	0.0013857	0.00045268	imputed	0.946	N/A	N/A	N/A	N/A	N/A	N/A	N/A	N/A	T	C	0.75993	0.0037429	0.0015464	0.015504	imputed	0.99	N/A	N/A	N/A	N/A	N/A	N/A	t	c	4.491	7.09e-06	+?++	N/A
2	FPG	rs1008133	9	20146963	SLC24A2 / SMNP	C	A	0.86585	-0.011904	0.0026285	5.93e-06	imputed	0.939	N/A	N/A	N/A	N/A	N/A	N/A	N/A	N/A	C	A	0.914065	0.002602	0.0022379	0.24494	imputed	0.97	C	A	0.64612	0.0033881	0.0013929	0.015003	imputed	0.981	N/A	N/A	N/A	N/A	N/A	N/A	a	c	0.051	0.9591	?-+-	a
2	FPG	rs12344376	9	132846635	FIBCD1 / LAMC3	T	G	0.063023	0.015854	0.0035783	9.39e-06	imputed	0.976	T	G	0.47051	-0.0014658	0.0010996	0.1825	imputed	0.989	T	G	0.038059	0.0020954	0.0032193	0.51512	imputed	0.952	T	G	0.065789	-0.0048026	0.0026086	0.065606	genotyped	1	N/A	N/A	N/A	N/A	N/A	N/A	t	g	0.658	0.5107	-++-	t
2	FPG	rs914818	10	84569337	NRG3	G	C	0.78627	-0.0070406	0.0020812	0.00071731	imputed	0.998	G	C	0.73085	-0.0020994	0.0013032	0.10719	imputed	0.98	G	C	0.89136	-0.0040259	0.0020139	0.045598	imputed	0.996	G	C	0.79348	-0.0034248	0.0016478	0.037668	imputed	0.995	N/A	N/A	N/A	N/A	N/A	N/A	c	g	4.425	9.64e-06	++++	c
2	FPG	rs6586140	10	90301131	C10orf59	T	G	0.51408	-0.0078527	0.001762	8.32e-06	genotyped	1	T	G	0.3814	-0.002233	0.0011297	0.048076	genotyped	1	N/A	N/A	N/A	N/A	N/A	N/A	N/A	N/A	T	G	0.50286	-0.0013963	0.0013164	0.28882	imputed	0.963	N/A	N/A	N/A	N/A	N/A	N/A	t	g	-4.126	3.69e-05	-?--	N/A
2	FPG	rs7908611	10	117439069	ATRNL1	G	A	0.66524	-0.0084344	0.0018515	5.23e-06	genotyped	1	G	A	0.49535	0.0015997	0.0011129	0.15062	genotyped	1	G	A	0.37953	0.00020391	0.0012824	0.87366	imputed	0.991	G	A	0.7657	-0.00034966	0.0015136	0.81731	genotyped	1	N/A	N/A	N/A	N/A	N/A	N/A	a	g	1.278	0.2012	--++	a
2	FPG	rs7093582	10	117440711	ATRNL1	C	A	0.33653	0.0084845	0.0018651	5.39e-06	imputed	0.983	C	A	0.48576	-0.0015755	0.0011609	0.17473	imputed	0.907	C	A	0.62208	-0.00021463	0.0012895	0.86781	imputed	0.987	C	A	0.23767	0.00037683	0.0015265	0.80501	imputed	0.974	N/A	N/A	N/A	N/A	N/A	N/A	a	c	-1.319	0.1872	++--	a
2	FPG	rs992888	10	117460375	ATRNL1	G	C	0.66673	-0.0086109	0.0018634	3.82e-06	imputed	0.998	G	C	0.49422	0.0015036	0.0011155	0.17767	imputed	0.981	G	C	0.37982	0.0002249	0.0012852	0.86109	imputed	0.996	G	C	0.79165	-0.0015032	0.0015973	0.34667	imputed	0.999	N/A	N/A	N/A	N/A	N/A	N/A	c	g	1.707	0.08777	--++	c
2	FPG	rs10885789	10	117468786	ATRNL1	C	A	0.66642	-0.0086126	0.0018638	3.82e-06	imputed	0.997	C	A	0.4958	0.0015447	0.0011163	0.16641	imputed	0.976	C	A	0.37762	0.00012597	0.0012884	0.92211	imputed	0.996	C	A	0.79196	-0.0013312	0.0015984	0.40492	imputed	0.998	N/A	N/A	N/A	N/A	N/A	N/A	a	c	1.677	0.09363	--++	a
2	FPG	rs3847554	11	92308474	LOC100128354	T	C	0.34333	0.0065155	0.0017677	0.00022788	genotyped	1	T	C	0.89535	-0.00012548	0.001784	0.94392	genotyped	1	T	C	0.41671	0.0065085	0.0012597	2.38e-07	genotyped	0.999	T	C	0.5775	0.0051443	0.0013527	0.00014303	genotyped	0.999	T	C	0.4393	0.001352	0.001046	0.1966	t	c	6.374	1.84e-10	-+++	t
2	FPG	rs1387153	11	92313476	LOC100128354 / MTNR1B	T	C	0.24051	0.0072813	0.0019911	0.00025522	genotyped	1	T	C	0.33907	0.00042461	0.0011693	0.7165	genotyped	1	T	C	0.30285	0.0064033	0.0013244	1.33e-06	genotyped	1	T	C	0.43591	0.0027932	0.0013231	0.034759	genotyped	1	T	C	0.3123	0.0036	0.001097	0.001048	t	c	5.519	3.4e-08	++++	t
2	FPG	rs11523890	11	92319426	LOC100128354 / MTNR1B	T	C	0.27784	0.0067976	0.0019039	0.00035645	imputed	0.987	T	C	0.36967	-5.56e-06	0.0011593	0.99618	imputed	0.961	T	C	0.33725	0.0072303	0.0013357	6.19e-08	imputed	0.902	T	C	0.43731	0.0029082	0.0013283	0.02856	imputed	0.992	N/A	N/A	N/A	N/A	N/A	N/A	t	c	5.663	1.49e-08	-+++	t
2	FPG	rs10830956	11	92320661	LOC100128354 / MTNR1B	T	C	0.24164	0.0073188	0.0019933	0.00024097	imputed	0.997	T	C	0.34516	0.00031338	0.0011833	0.79114	imputed	0.957	T	C	0.31074	0.0067298	0.0013367	4.79e-07	imputed	0.964	T	C	0.43505	0.0029148	0.0013325	0.028705	imputed	0.986	N/A	N/A	N/A	N/A	N/A	N/A	t	c	5.627	1.83e-08	++++	t
2	FPG	rs7933855	11	92323970	LOC100128354 / MTNR1B	G	A	0.66029	-0.0069323	0.0018002	0.00011766	imputed	0.993	N/A	N/A	N/A	N/A	N/A	N/A	N/A	N/A	G	A	0.59592	-0.0069648	0.0012642	3.61e-08	imputed	0.982	G	A	0.54515	-0.0030304	0.0013378	0.023498	imputed	0.981	N/A	N/A	N/A	N/A	N/A	N/A	a	g	6.752	1.46e-11	?+++	a
2	FPG	rs7936247	11	92329680	LOC100128354 / MTNR1B	T	G	0.27791	0.006832	0.0019014	0.00032663	imputed	0.99	T	G	0.36983	-5.48e-06	0.0011609	0.99623	imputed	0.958	T	G	0.33756	0.0072841	0.001334	4.76e-08	imputed	0.903	T	G	0.43635	0.0030404	0.0013299	0.022239	imputed	0.995	T	G	0.3605	0.002857	0.001064	0.007283	t	g	5.748	9.01e-09	-+++	t
2	FPG	rs2166706	11	92331180	LOC100128354 / MTNR1B	T	C	0.67625	-0.0061243	0.0018221	0.00077653	genotyped	1	T	C	0.34419	0.0014773	0.001187	0.21329	genotyped	1	T	C	0.60973	-0.006415	0.0012518	2.98e-07	genotyped	1	T	C	0.55053	-0.0030057	0.0013261	0.023416	genotyped	1	N/A	N/A	N/A	N/A	N/A	N/A	t	c	-4.842	1.29e-06	+---	t
2	FPG	rs10830963	11	92348358	MTNR1B	G	C	0.24038	0.011274	0.002019	2.35e-08	genotyped	0.999	N/A	N/A	N/A	N/A	N/A	N/A	genotyped	NA	N/A	N/A	N/A	N/A	N/A	N/A	N/A	N/A	G	C	0.42317	0.0056131	0.0013496	3.19e-05	genotyped	1	N/A	N/A	N/A	N/A	N/A	N/A	c	g	-6.769	1.29e-11	??--	N/A
2	FPG	rs1562444	11	92355497	MTNR1B	G	A	0.25949	-0.003848	0.0019911	0.053278	genotyped	1	G	A	0.43071	0.00011187	0.0011146	0.92005	genotyped	1	G	A	0.49593	-0.0054748	0.0012326	8.93e-06	imputed	0.97	G	A	0.26422	-0.0029677	0.0014779	0.044641	imputed	0.974	N/A	N/A	N/A	N/A	N/A	N/A	a	g	4.28	1.87e-05	-+++	a
2	FPG	rs1597023	11	92360967	MTNR1B / SLC36A4	G	A	0.25887	-0.0034708	0.0019846	0.080318	genotyped	1	G	A	0.42884	0.00016257	0.0011137	0.88394	genotyped	1	G	A	0.49268	-0.0053029	0.0012131	1.24e-05	genotyped	1	G	A	0.26634	-0.0029622	0.0015115	0.050014	imputed	0.928	G	A	0.4699	-0.003502	0.00101	0.0005336	a	g	4.115	3.88e-05	-+++	a
2	FPG	rs17813210	12	82730634	LOC401725 / LOC100128335	T	G	0.80477	-0.00099367	0.0022134	0.65348	genotyped	1	T	G	0.8786	-0.0010871	0.0017034	0.52336	genotyped	1	T	G	0.76774	-0.0022119	0.0014543	0.12827	genotyped	1	T	G	0.71477	0.0067135	0.0014445	3.35e-06	genotyped	1	N/A	N/A	N/A	N/A	N/A	N/A	t	g	1.044	0.2966	---+	t
2	FPG	rs4594071	12	82736071	LOC401725 / LOC100128335	G	A	0.20772	0.00085755	0.0021685	0.69251	imputed	0.992	G	A	0.28515	0.00053034	0.0012314	0.6667	imputed	0.936	G	A	0.23471	0.0020785	0.0014493	0.15153	imputed	0.998	G	A	0.28207	-0.0067487	0.0014669	4.21e-06	imputed	0.974	N/A	N/A	N/A	N/A	N/A	N/A	a	g	1.193	0.2329	---+	a
2	FPG	rs9576999	13	31273453	RXFP2	T	C	0.29865	0.0016712	0.001917	0.38333	genotyped	1	T	C	0.22651	0.0058001	0.0013131	1e-05	genotyped	1	T	C	0.38515	-0.0012261	0.0012751	0.33624	genotyped	1	T	C	0.55426	0.00066126	0.0013254	0.61783	imputed	0.998	N/A	N/A	N/A	N/A	N/A	N/A	t	c	2.272	0.02311	+-++	t
2	FPG	rs1322578	13	31277077	RXFP2 / EEF1DP3	T	C	0.29881	0.0016712	0.0019175	0.38346	imputed	0.999	T	C	0.22541	0.0058792	0.0013149	7.78e-06	imputed	0.999	T	C	0.38119	-0.0013105	0.0012791	0.30558	imputed	0.996	T	C	0.5551	0.00066694	0.0013234	0.61428	imputed	0.999	N/A	N/A	N/A	N/A	N/A	N/A	t	c	2.266	0.02346	+-++	t
2	FPG	rs12885503	14	20894235	SUPT16H	T	C	0.22133	-0.00036565	0.0021824	0.86694	imputed	0.961	T	C	0.35785	-0.00092724	0.0011713	0.42856	imputed	0.98	T	C	0.082306	0.010718	0.0023946	7.62e-06	imputed	0.917	T	C	0.11298	-0.00035969	0.0020635	0.86162	imputed	0.987	N/A	N/A	N/A	N/A	N/A	N/A	t	c	1.933	0.05325	-+--	t
2	FPG	rs1543494	14	20899244	SUPT16H	T	C	0.20888	-0.00035686	0.0022318	0.87296	imputed	0.953	N/A	N/A	N/A	N/A	N/A	N/A	N/A	N/A	T	C	0.080506	0.010745	0.0024179	8.83e-06	imputed	0.919	T	C	0.11217	-0.00033679	0.0020605	0.87016	imputed	0.996	N/A	N/A	N/A	N/A	N/A	N/A	t	c	2.658	0.007856	?+--	t
2	FPG	rs10138699	14	20900892	SUPT16H	T	C	0.21588	-0.00039213	0.0021636	0.85618	imputed	0.999	T	C	0.35773	-0.00093102	0.0011708	0.4265	imputed	0.981	T	C	0.082082	0.010711	0.0023902	7.43e-06	imputed	0.923	T	C	0.11254	-0.00028184	0.002058	0.89107	imputed	0.995	N/A	N/A	N/A	N/A	N/A	N/A	t	c	1.947	0.05147	-+--	t
2	FPG	rs10146717	14	20900952	SUPT16H	G	A	0.21603	-0.00039763	0.0021624	0.85411	genotyped	1	G	A	0.36233	-0.00087786	0.0011549	0.4472	genotyped	1	G	A	0.082029	0.010725	0.0023901	7.21e-06	imputed	0.924	G	A	0.11205	-0.00028725	0.0020576	0.88898	genotyped	1	N/A	N/A	N/A	N/A	N/A	N/A	a	g	-1.966	0.04933	+-++	a
2	FPG	rs10782384	14	20902300	SUPT16H	G	A	0.78402	0.00039602	0.0021628	0.85472	imputed	1	G	A	0.63765	0.0008781	0.001155	0.44708	imputed	1	G	A	0.919234	-0.010723	0.0023836	6.83e-06	imputed	0.942	G	A	0.88744	0.00028635	0.0020594	0.88942	imputed	0.995	N/A	N/A	N/A	N/A	N/A	N/A	a	g	1.973	0.04853	-+--	a
2	FPG	rs2295866	14	20902987	SUPT16H	G	A	0.21603	-0.00039763	0.0021624	0.85411	genotyped	1	G	A	0.36233	-0.00087786	0.0011549	0.4472	genotyped	1	G	A	0.080394	0.010692	0.002377	6.85e-06	imputed	0.95	G	A	0.1127	-0.00028921	0.0020589	0.88829	imputed	0.994	N/A	N/A	N/A	N/A	N/A	N/A	a	g	-1.971	0.04867	+-++	a
2	FPG	rs225988	14	29569781	PRKD1 / LOC100128358	G	C	0.41722	-0.00069088	0.0017781	0.6976	imputed	0.995	G	C	0.29204	-0.0055896	0.001265	9.94e-06	imputed	0.9	G	C	0.28866	-0.00066396	0.0013764	0.62954	imputed	0.991	G	C	0.76397	0.0002114	0.0015538	0.89178	imputed	0.995	N/A	N/A	N/A	N/A	N/A	N/A	c	g	2.539	0.01111	+++-	c
2	FPG	rs2183237	14	37873507	CLEC14A / KRT8P1	G	A	0.62301	-0.0036365	0.001791	0.042313	genotyped	1	G	A	0.74884	-0.0043692	0.0012694	0.00057728	genotyped	1	G	A	0.74182	-0.0041351	0.0014007	0.0031559	imputed	0.999	G	A	0.47835	-0.0010416	0.0013218	0.43066	genotyped	1	A	G	0.2589	-0.002625	0.001157	0.0234	a	g	4.61	4.02e-06	++++	a
2	FPG	rs3825853	15	67116645	NOX5	N/A	N/A	N/A	N/A	N/A	N/A	N/A	N/A	T	C	0.027758	-0.0081465	0.0033994	0.016555	genotyped	0.994	T	C	0.012451	-0.016989	0.0055041	0.002025	imputed	0.991	T	C	0.026187	-0.0091309	0.0041832	0.029054	imputed	0.979	N/A	N/A	N/A	N/A	N/A	N/A	t	c	-4.448	8.68e-06	--?-	t
2	FPG	rs3826261	16	23784676	PRKCB1	G	A	0.38775	-0.00054548	0.0017984	0.76166	imputed	0.961	N/A	N/A	N/A	N/A	N/A	N/A	N/A	N/A	G	A	0.4689	-0.0016999	0.0012721	0.18146	imputed	0.917	G	A	0.34215	-0.0062256	0.0013772	6.17e-06	imputed	0.987	N/A	N/A	N/A	N/A	N/A	N/A	a	g	3.677	0.0002356	?+++	a
2	FPG	rs9806904	16	23784843	PRKCB1	C	A	0.4041	-0.0001968	0.0017659	0.91127	imputed	0.983	C	A	0.71257	0.00091928	0.0012681	0.4685	imputed	0.914	C	A	0.4836	-0.0015993	0.0012525	0.20165	imputed	0.953	C	A	0.3438	-0.0061847	0.0013646	5.84e-06	genotyped	1	N/A	N/A	N/A	N/A	N/A	N/A	a	c	2.735	0.006237	-+++	a
2	FPG	rs8047317	16	23789545	PRKCB1	G	A	0.61309	0.0010163	0.0017774	0.56746	imputed	0.997	G	A	0.56986	-0.0025662	0.0011287	0.02299	imputed	0.962	G	A	0.52954	0.001847	0.0012586	0.14224	imputed	0.94	G	A	0.65705	0.0061771	0.0013712	6.65e-06	genotyped	1	N/A	N/A	N/A	N/A	N/A	N/A	a	g	-2.262	0.0237	+---	a
2	FPG	rs1468130	16	23790049	PRKCB1	G	A	0.38739	-0.0010396	0.0017749	0.55805	genotyped	1	G	A	0.43954	0.0025551	0.0011042	0.020663	genotyped	1	G	A	0.47163	-0.0018628	0.0012563	0.13815	imputed	0.945	G	A	0.34488	-0.006176	0.001376	7.18e-06	imputed	0.989	N/A	N/A	N/A	N/A	N/A	N/A	a	g	2.248	0.02458	-+++	a
2	FPG	rs4787642	16	30266909	LOC595101 / CD2BP2	T	C	0.78463	-0.0029037	0.0021829	0.18346	imputed	0.997	T	C	0.69233	-0.0024461	0.0012005	0.041598	imputed	0.988	T	C	0.65162	-0.0043212	0.0013118	0.00098772	imputed	0.984	T	C	0.919892	-0.0053438	0.0024325	0.028032	imputed	0.991	N/A	N/A	N/A	N/A	N/A	N/A	t	c	-4.534	5.79e-06	----	t
2	FPG	rs11862806	16	30271572	CD2BP2	G	A	0.24174	0.0029655	0.0020941	0.15673	genotyped	1	G	A	0.62744	0.001968	0.0011391	0.084035	genotyped	1	G	A	0.35955	0.004214	0.0012908	0.0010965	genotyped	1	G	A	0.090641	0.006125	0.0022656	0.0068623	imputed	0.99	N/A	N/A	N/A	N/A	N/A	N/A	a	g	-4.663	3.12e-06	----	a
2	FPG	rs8049108	16	30283987	TBC1D10B	T	C	0.75765	-0.0026813	0.0020866	0.19878	genotyped	1	T	C	0.37023	-0.0020639	0.0011386	0.069882	genotyped	1	T	C	0.64107	-0.004181	0.0012922	0.0012138	imputed	0.999	T	C	0.910017	-0.006104	0.0022608	0.0069339	genotyped	1	N/A	N/A	N/A	N/A	N/A	N/A	t	c	-4.631	3.64e-06	----	t
2	FPG	rs1495821	18	57034928	hCG_1659830 / LOC100129867	G	A	0.68565	0.0013579	0.0019128	0.47774	imputed	0.986	G	A	0.957324	0.0032551	0.0027461	0.23587	imputed	0.972	G	A	0.76603	-0.0066334	0.0014819	7.59e-06	imputed	0.988	N/A	N/A	N/A	N/A	N/A	N/A	N/A	N/A	N/A	N/A	N/A	N/A	N/A	N/A	a	g	1.863	0.06247	-+-?	a
2	FPG	rs17684264	18	57036294	hCG_1659830 / LOC100129867	G	A	0.68048	0.0012358	0.0019065	0.51687	imputed	0.985	G	A	0.84929	0.001972	0.0015076	0.19086	imputed	0.96	G	A	0.76282	-0.0066294	0.0014685	6.35e-06	imputed	0.989	G	A	0.74208	0.0017102	0.0014902	0.25111	imputed	0.962	N/A	N/A	N/A	N/A	N/A	N/A	a	g	0.992	0.321	-+--	a
2	FPG	rs16994456	19	1489945	PLK5P / MEX3D	G	C	0.72948	-0.0095805	0.0019963	1.59e-06	imputed	0.943	G	C	0.59705	-0.00038806	0.0011532	0.7365	imputed	0.943	N/A	N/A	N/A	N/A	N/A	N/A	N/A	N/A	N/A	N/A	N/A	N/A	N/A	N/A	N/A	N/A	N/A	N/A	N/A	N/A	N/A	N/A	c	g	3.407	0.0006562	+?+?	N/A
2	FPG	rs2668433	19	1491506	PLK5P / MEX3D	G	A	0.76438	-0.009513	0.0020184	2.44e-06	genotyped	1	G	A	0.949331	-0.00061617	0.0025515	0.80917	genotyped	0.999	N/A	N/A	N/A	N/A	N/A	N/A	N/A	N/A	G	A	0.83239	-0.00086612	0.0017485	0.62034	imputed	0.971	N/A	N/A	N/A	N/A	N/A	N/A	a	g	2.881	0.003962	+?++	N/A
2	FPG	rs3746750	20	61069344	C20orf59	G	A	0.64076	-0.0011724	0.0018301	0.52179	genotyped	1	G	A	0.36791	0.00058384	0.0011473	0.61084	genotyped	1	G	A	0.61412	-0.0061817	0.0013111	2.42e-06	genotyped	1	G	A	0.72627	-0.001891	0.0015147	0.21186	imputed	0.951	A	G	0.3897	0.0001072	0.001049	0.9186	a	g	3.285	0.001021	-+++	a
2	FPG	rs5754319	22	31600348	SYN3	C	A	0.79061	-0.0052338	0.002099	0.012649	imputed	0.999	C	A	0.901244	-0.0082299	0.0018551	9.15e-06	imputed	0.978	C	A	0.7853	-0.0013004	0.0015303	0.39545	imputed	0.996	C	A	0.940253	-0.0038153	0.0027765	0.1694	imputed	0.994	N/A	N/A	N/A	N/A	N/A	N/A	a	c	4.433	9.28e-06	++++	a
2	FPG	rs5754321	22	31600461	SYN3	T	C	0.78951	-0.0051959	0.0021022	0.01345	imputed	0.993	T	C	0.901724	-0.0081866	0.0018507	9.71e-06	imputed	0.984	T	C	0.78221	-0.001102	0.0015307	0.47158	imputed	0.98	T	C	0.938328	-0.0038458	0.0027904	0.16813	imputed	0.962	N/A	N/A	N/A	N/A	N/A	N/A	t	c	-4.348	1.38e-05	----	t
[truncated: 9 more columns]

## Sheet: Suppl_Table_7
Supplementary Table 7: Associations with Previously Identified Diabetes, Glucose, and Insulin Genes
								GWAS																																Replication						Meta-Analyses
								Afro-Caribbean (N=1075)								Northern European (N=1367)								Hispanic (N=817)								Thai (N=1178)								Northern European (N=2192)						GWAS Populations (AC-EU-HI-TH)
Model	Trait	SNP	Chromo-some	Position	Gene or Flanking Genes	Literature Reference	Previously Identified Trait	Effect Allele	Non-Effect Allele	Effect Allele Frequency	Beta	SE	P	Genotyped or Imputed	Imputation r2	Effect Allele	Non-Effect Allele	Effect Allele Frequency	Beta	SE	P	Genotyped or Imputed	Imputation r2	Effect Allele	Non-Effect Allele	Effect Allele Frequency	Beta	SE	P	Genotyped or Imputed	Imputation r2	Effect Allele	Non-Effect Allele	Effect Allele Frequency	Beta	SE	P	Genotyped or Imputed	Imputation r2	Effect Allele	Non-Effect Allele	Effect Allele Frequency	Beta	SE	P	Effect Allele	Non-Effect Allele	Zscore	P
1	1HPG	rs2779116	1	156852039	SPTA1	Soranzo et al. 2010	Hemoglobin A1C	T	C	0.2205	-0.031093	0.033065	0.34704	Imputed	1	T	C	0.28368	-0.0008031	0.05375	0.98808	Imputed	0.996	T	C	0.3411	0.10248	0.073961	0.16587	Imputed	0.996	T	C	0.46093	-0.073075	0.051174	0.15331	Imputed	1	NA	NA	NA	NA	NA	NA	t	c	-0.612	0.5403
2	1HPG	rs2779116	1	156852039	SPTA1	Soranzo et al. 2010	Hemoglobin A1C	T	C	0.2205	-0.037601	0.032839	0.25221	Imputed	1	T	C	0.28368	-0.0043182	0.052296	0.93419	Imputed	0.996	T	C	0.3411	0.088128	0.071278	0.21631	Imputed	0.996	T	C	0.46093	-0.067584	0.050416	0.18008	Imputed	1	NA	NA	NA	NA	NA	NA	t	c	-0.77	0.4415
1	2HPG	rs2779116	1	156852039	SPTA1	Soranzo et al. 2010	Hemoglobin A1C	T	C	0.2205	0.015874	0.028853	0.5822	Imputed	1	T	C	0.28368	0.028221	0.043078	0.5124	Imputed	0.996	T	C	0.3411	0.088368	0.057135	0.12194	Imputed	0.996	T	C	0.46093	0.038795	0.044681	0.38525	Imputed	1	NA	NA	NA	NA	NA	NA	t	c	1.746	0.0809
2	2HPG	rs2779116	1	156852039	SPTA1	Soranzo et al. 2010	Hemoglobin A1C	T	C	0.2205	0.0089074	0.028254	0.75256	Imputed	1	T	C	0.28368	0.029754	0.041931	0.47795	Imputed	0.996	T	C	0.3411	0.076033	0.055453	0.17034	Imputed	0.996	T	C	0.46093	0.042123	0.044173	0.34029	Imputed	1	NA	NA	NA	NA	NA	NA	t	c	1.629	0.1034
1	FCP	rs2779116	1	156852039	SPTA1	Soranzo et al. 2010	Hemoglobin A1C	T	C	0.22163	0.01254	0.0094732	0.1856	Imputed	1	T	C	0.28399	0.0079596	0.0071433	0.26516	Imputed	0.996	T	C	0.3411	-0.0027571	0.008815	0.75445	Imputed	0.996	T	C	0.46093	-0.013523	0.0070392	0.054711	Imputed	1	NA	NA	NA	NA	NA	NA	t	c	0.142	0.8871
2	FCP	rs2779116	1	156852039	SPTA1	Soranzo et al. 2010	Hemoglobin A1C	T	C	0.22163	0.019094	0.0084814	0.024368	Imputed	1	T	C	0.28399	0.0035085	0.0060005	0.55874	Imputed	0.996	T	C	0.3411	-0.0054151	0.0070577	0.44292	Imputed	0.996	T	C	0.46093	-0.010962	0.0062098	0.077515	Imputed	1	NA	NA	NA	NA	NA	NA	t	c	0.188	0.8506
1	FPG	rs2779116	1	156852039	SPTA1	Soranzo et al. 2010	Hemoglobin A1C	T	C	0.2205	0.00032177	0.0013478	0.81131	Imputed	1	T	C	0.28368	0.0010645	0.0014518	0.46341	Imputed	0.996	T	C	0.3411	0.0013062	0.0020153	0.51689	Imputed	0.996	T	C	0.46093	-0.0022087	0.0013889	0.11177	Imputed	1	NA	NA	NA	NA	NA	NA	t	c	-0.017	0.9866
2	FPG	rs2779116	1	156852039	SPTA1	Soranzo et al. 2010	Hemoglobin A1C	T	C	0.2205	0.00076167	0.0013155	0.56259	Imputed	1	T	C	0.28368	0.00058749	0.0013724	0.66861	Imputed	0.996	T	C	0.3411	0.00083974	0.0018452	0.64904	Imputed	0.996	T	C	0.46093	-0.0019644	0.0013241	0.13791	Imputed	1	NA	NA	NA	NA	NA	NA	t	c	-0.047	0.9629
1	1HPG	rs2785980	1	217767142	LYPLAL1	Manning et al. 2012	Fasting Insulin	NA	NA	NA	NA	NA	NA	N/A	N/A	NA	NA	NA	NA	NA	NA	N/A	N/A	NA	NA	NA	NA	NA	NA	N/A	N/A	NA	NA	NA	NA	NA	NA	N/A	N/A	NA	NA	NA	NA	NA	NA	NA	NA	NA	NA
2	1HPG	rs2785980	1	217767142	LYPLAL1	Manning et al. 2012	Fasting Insulin	NA	NA	NA	NA	NA	NA	N/A	N/A	NA	NA	NA	NA	NA	NA	N/A	N/A	NA	NA	NA	NA	NA	NA	N/A	N/A	NA	NA	NA	NA	NA	NA	N/A	N/A	NA	NA	NA	NA	NA	NA	NA	NA	NA	NA
1	2HPG	rs2785980	1	217767142	LYPLAL1	Manning et al. 2012	Fasting Insulin	NA	NA	NA	NA	NA	NA	N/A	N/A	NA	NA	NA	NA	NA	NA	N/A	N/A	NA	NA	NA	NA	NA	NA	N/A	N/A	NA	NA	NA	NA	NA	NA	N/A	N/A	NA	NA	NA	NA	NA	NA	NA	NA	NA	NA
2	2HPG	rs2785980	1	217767142	LYPLAL1	Manning et al. 2012	Fasting Insulin	NA	NA	NA	NA	NA	NA	N/A	N/A	NA	NA	NA	NA	NA	NA	N/A	N/A	NA	NA	NA	NA	NA	NA	N/A	N/A	NA	NA	NA	NA	NA	NA	N/A	N/A	NA	NA	NA	NA	NA	NA	NA	NA	NA	NA
1	FCP	rs2785980	1	217767142	LYPLAL1	Manning et al. 2012	Fasting Insulin	NA	NA	NA	NA	NA	NA	N/A	N/A	NA	NA	NA	NA	NA	NA	N/A	N/A	NA	NA	NA	NA	NA	NA	N/A	N/A	NA	NA	NA	NA	NA	NA	N/A	N/A	NA	NA	NA	NA	NA	NA	NA	NA	NA	NA
2	FCP	rs2785980	1	217767142	LYPLAL1	Manning et al. 2012	Fasting Insulin	NA	NA	NA	NA	NA	NA	N/A	N/A	NA	NA	NA	NA	NA	NA	N/A	N/A	NA	NA	NA	NA	NA	NA	N/A	N/A	NA	NA	NA	NA	NA	NA	N/A	N/A	NA	NA	NA	NA	NA	NA	NA	NA	NA	NA
1	FPG	rs2785980	1	217767142	LYPLAL1	Manning et al. 2012	Fasting Insulin	NA	NA	NA	NA	NA	NA	N/A	N/A	NA	NA	NA	NA	NA	NA	N/A	N/A	NA	NA	NA	NA	NA	NA	N/A	N/A	NA	NA	NA	NA	NA	NA	N/A	N/A	NA	NA	NA	NA	NA	NA	NA	NA	NA	NA
2	FPG	rs2785980	1	217767142	LYPLAL1	Manning et al. 2012	Fasting Insulin	NA	NA	NA	NA	NA	NA	N/A	N/A	NA	NA	NA	NA	NA	NA	N/A	N/A	NA	NA	NA	NA	NA	NA	N/A	N/A	NA	NA	NA	NA	NA	NA	N/A	N/A	NA	NA	NA	NA	NA	NA	NA	NA	NA	NA
1	1HPG	rs1371614	2	27006378	DPYSL5	Manning et al. 2012	Fasting Glucose	T	C	0.37116	-0.016716	0.028996	0.56429	Genotyped	N/A	T	C	0.26298	0.086099	0.056046	0.12448	Genotyped	N/A	T	C	0.40147	0.05731	0.071627	0.42364	Genotyped	N/A	T	C	0.15153	0.038863	0.070394	0.5809	Genotyped	N/A	NA	NA	NA	NA	NA	NA	t	c	1.197	0.2314
2	1HPG	rs1371614	2	27006378	DPYSL5	Manning et al. 2012	Fasting Glucose	T	C	0.37116	-0.01718	0.028798	0.5508	Genotyped	N/A	T	C	0.26298	0.06209	0.05453	0.25485	Genotyped	N/A	T	C	0.40147	0.060499	0.069025	0.38077	Genotyped	N/A	T	C	0.15153	0.012989	0.069351	0.85142	Genotyped	N/A	NA	NA	NA	NA	NA	NA	t	c	0.811	0.4174
1	2HPG	rs1371614	2	27006378	DPYSL5	Manning et al. 2012	Fasting Glucose	T	C	0.37116	0.017564	0.025303	0.48757	Genotyped	N/A	T	C	0.26298	0.12043	0.044915	0.007336	Genotyped	N/A	T	C	0.40147	0.03852	0.055381	0.48672	Genotyped	N/A	T	C	0.15153	0.0028662	0.061462	0.96281	Genotyped	N/A	NA	NA	NA	NA	NA	NA	t	c	2.152	0.03137
2	2HPG	rs1371614	2	27006378	DPYSL5	Manning et al. 2012	Fasting Glucose	T	C	0.37116	0.0069357	0.024777	0.77954	Genotyped	N/A	T	C	0.26298	0.10146	0.043717	0.020292	Genotyped	N/A	T	C	0.40147	0.044909	0.053751	0.40344	Genotyped	N/A	T	C	0.15153	-0.017071	0.060763	0.77875	Genotyped	N/A	NA	NA	NA	NA	NA	NA	t	c	1.64	0.1011
1	FCP	rs1371614	2	27006378	DPYSL5	Manning et al. 2012	Fasting Glucose	T	C	0.3723	-0.0059855	0.0083262	0.47221	Genotyped	N/A	T	C	0.26322	0.014786	0.0074491	0.047152	Genotyped	N/A	T	C	0.40147	0.019115	0.0085351	0.025121	Genotyped	N/A	T	C	0.15153	0.016375	0.009683	0.090819	Genotyped	N/A	NA	NA	NA	NA	NA	NA	t	c	2.584	0.009759
2	FCP	rs1371614	2	27006378	DPYSL5	Manning et al. 2012	Fasting Glucose	T	C	0.3723	-0.0016976	0.0074544	0.81985	Genotyped	N/A	T	C	0.26322	0.0071455	0.0062565	0.25342	Genotyped	N/A	T	C	0.40147	0.018273	0.0068394	0.0075465	Genotyped	N/A	T	C	0.15153	0.0084803	0.008542	0.32082	Genotyped	N/A	NA	NA	NA	NA	NA	NA	t	c	2.183	0.02905
1	FPG	rs1371614	2	27006378	DPYSL5	Manning et al. 2012	Fasting Glucose	T	C	0.37116	-0.00015399	0.0011819	0.89634	Genotyped	N/A	T	C	0.26298	0.0043132	0.0015129	0.0043592	Genotyped	N/A	T	C	0.40147	0.00060427	0.0019512	0.7568	Genotyped	N/A	T	C	0.15153	0.0023254	0.0019105	0.22354	Genotyped	N/A	NA	NA	NA	NA	NA	NA	t	c	2.278	0.02271
2	FPG	rs1371614	2	27006378	DPYSL5	Manning et al. 2012	Fasting Glucose	T	C	0.37116	0.00024423	0.0011536	0.83233	Genotyped	N/A	T	C	0.26298	0.0033647	0.0014304	0.018655	Genotyped	N/A	T	C	0.40147	0.00056678	0.001787	0.75112	Genotyped	N/A	T	C	0.15153	0.0011185	0.0018214	0.53916	Genotyped	N/A	NA	NA	NA	NA	NA	NA	t	c	1.862	0.06254
1	1HPG	rs1260326	2	27584444	GCKR	Saxena et al. 2010	2-hr Glucose	T	C	0.12233	-0.028043	0.04216	0.50596	Genotyped	N/A	T	C	0.39722	-0.055696	0.049157	0.2572	Genotyped	N/A	T	C	0.32987	-0.017081	0.074981	0.8198	Genotyped	N/A	T	C	0.34253	-0.08902	0.052782	0.091689	Genotyped	N/A	T	C	0.4093	-0.1442	0.0417	0.0005522	t	c	-1.923	0.05447
2	1HPG	rs1260326	2	27584444	GCKR	Saxena et al. 2010	2-hr Glucose	T	C	0.12233	-0.023234	0.041872	0.57898	Genotyped	N/A	T	C	0.39722	-0.075914	0.047827	0.11245	Genotyped	N/A	T	C	0.32987	-0.039716	0.072256	0.58256	Genotyped	N/A	T	C	0.34253	-0.10066	0.052	0.052893	Genotyped	N/A	T	C	0.4093	-0.1401	0.03999	0.0004682	t	c	-2.387	0.01697
1	2HPG	rs1260326	2	27584444	GCKR	Saxena et al. 2010	2-hr Glucose	T	C	0.12233	-0.0072231	0.03679	0.84435	Genotyped	N/A	T	C	0.39722	0.038489	0.039394	0.32856	Genotyped	N/A	T	C	0.32987	0.015375	0.057974	0.79085	Genotyped	N/A	T	C	0.34253	-0.030332	0.046085	0.51043	Genotyped	N/A	T	C	0.4093	-0.0303	0.03528	0.3905	t	c	0.22	0.8256
2	2HPG	rs1260326	2	27584444	GCKR	Saxena et al. 2010	2-hr Glucose	T	C	0.12233	-0.0051469	0.036025	0.88639	Genotyped	N/A	T	C	0.39722	0.021328	0.038343	0.57805	Genotyped	N/A	T	C	0.32987	-0.0019999	0.056268	0.97165	Genotyped	N/A	T	C	0.34253	-0.038844	0.045561	0.3939	Genotyped	N/A	T	C	0.4093	-0.02681	0.0341	0.4317	t	c	-0.216	0.8289
1	FCP	rs1260326	2	27584444	GCKR	Saxena et al. 2010	2-hr Glucose	T	C	0.12254	-0.011557	0.012085	0.33894	Genotyped	N/A	T	C	0.39794	-0.018537	0.0065351	0.0045604	Genotyped	N/A	T	C	0.32987	-0.025102	0.0089347	0.0049614	Genotyped	N/A	T	C	0.34253	-0.014373	0.0072604	0.047745	Genotyped	N/A	T	C	0.4093	-0.01232	0.005537	0.0262	t	c	-4.273	1.929e-05
2	FCP	rs1260326	2	27584444	GCKR	Saxena et al. 2010	2-hr Glucose	T	C	0.12254	-0.014889	0.01082	0.16879	Genotyped	N/A	T	C	0.39794	-0.023807	0.0054888	1.4423e-05	Genotyped	N/A	T	C	0.32987	-0.029837	0.0071597	3.0814e-05	Genotyped	N/A	T	C	0.34253	-0.018117	0.0064049	0.0046743	Genotyped	N/A	T	C	0.4093	-0.01159	0.004549	0.01092	t	c	-6.334	2.393e-10
1	FPG	rs1260326	2	27584444	GCKR	Saxena et al. 2010	2-hr Glucose	T	C	0.12233	0.0010701	0.0017185	0.53349	Genotyped	N/A	T	C	0.39722	-0.004503	0.001327	0.00069011	Genotyped	N/A	T	C	0.32987	-0.0058207	0.0020426	0.0043761	Genotyped	N/A	T	C	0.34253	-0.003747	0.0014325	0.008907	Genotyped	N/A	T	C	0.4093	-0.004559	0.00115	7.612e-05	t	c	-4.148	3.359e-05
2	FPG	rs1260326	2	27584444	GCKR	Saxena et al. 2010	2-hr Glucose	T	C	0.12233	0.00085627	0.0016773	0.6097	Genotyped	N/A	T	C	0.39722	-0.0051757	0.0012546	3.6992e-05	Genotyped	N/A	T	C	0.32987	-0.0066233	0.0018707	0.00039924	Genotyped	N/A	T	C	0.34253	-0.0043117	0.0013657	0.0015934	Genotyped	N/A	T	C	0.4093	-0.004431	0.001048	2.469e-05	t	c	-5.185	2.164e-07
1	1HPG	rs780094	2	27594741	GCKR	Saxena et al. 2010	Fasting Glucose	T	C	0.17953	-0.0067863	0.036402	0.85211	Genotyped	N/A	T	C	0.38954	-0.054705	0.049082	0.26504	Genotyped	N/A	T	C	0.33476	-0.024713	0.074418	0.73982	Genotyped	N/A	T	C	0.32258	-0.063163	0.054226	0.24409	Genotyped	N/A	NA	NA	NA	NA	NA	NA	t	c	-1.453	0.1462
2	1HPG	rs780094	2	27594741	GCKR	Saxena et al. 2010	Fasting Glucose	T	C	0.17953	-0.0066699	0.036153	0.85363	Genotyped	N/A	T	C	0.38954	-0.075147	0.047755	0.11558	Genotyped	N/A	T	C	0.33476	-0.042566	0.071714	0.55281	Genotyped	N/A	T	C	0.32258	-0.078411	0.053422	0.14217	Genotyped	N/A	NA	NA	NA	NA	NA	NA	t	c	-1.975	0.04824
1	2HPG	rs780094	2	27594741	GCKR	Saxena et al. 2010	Fasting Glucose	T	C	0.17953	-0.0029051	0.031765	0.92713	Genotyped	N/A	T	C	0.38954	0.044852	0.039335	0.25417	Genotyped	N/A	T	C	0.33476	0.011413	0.057539	0.84277	Genotyped	N/A	T	C	0.32258	-0.0035666	0.047346	0.93995	Genotyped	N/A	NA	NA	NA	NA	NA	NA	t	c	0.634	0.5259
2	2HPG	rs780094	2	27594741	GCKR	Saxena et al. 2010	Fasting Glucose	T	C	0.17953	-0.0036109	0.031105	0.90758	Genotyped	N/A	T	C	0.38954	0.027231	0.038285	0.47692	Genotyped	N/A	T	C	0.33476	-0.0017766	0.055845	0.97462	Genotyped	N/A	T	C	0.32258	-0.014889	0.046807	0.75041	Genotyped	N/A	NA	NA	NA	NA	NA	NA	t	c	0.16	0.8728
1	FCP	rs780094	2	27594741	GCKR	Saxena et al. 2010	Fasting Glucose	T	C	0.17981	-0.020793	0.010434	0.046287	Genotyped	N/A	T	C	0.39024	-0.020441	0.0065248	0.0017317	Genotyped	N/A	T	C	0.33476	-0.024147	0.0088676	0.0064681	Genotyped	N/A	T	C	0.32258	-0.011828	0.0074589	0.11278	Genotyped	N/A	NA	NA	NA	NA	NA	NA	t	c	-4.706	2.532e-06
2	FCP	rs780094	2	27594741	GCKR	Saxena et al. 2010	Fasting Glucose	T	C	0.17981	-0.019809	0.0093415	0.033957	Genotyped	N/A	T	C	0.39024	-0.025466	0.0054802	3.37e-06	Genotyped	N/A	T	C	0.33476	-0.028121	0.0071059	7.5766e-05	Genotyped	N/A	T	C	0.32258	-0.016656	0.0065801	0.011364	Genotyped	N/A	NA	NA	NA	NA	NA	NA	t	c	-6.627	3.422e-11
1	FPG	rs780094	2	27594741	GCKR	Saxena et al. 2010	Fasting Glucose	T	C	0.17953	0.00030086	0.0014838	0.83932	Genotyped	N/A	T	C	0.38954	-0.0039556	0.0013249	0.0028313	Genotyped	N/A	T	C	0.33476	-0.0050342	0.0020272	0.013018	Genotyped	N/A	T	C	0.32258	-0.003098	0.0014717	0.035288	Genotyped	N/A	NA	NA	NA	NA	NA	NA	t	c	-3.708	0.0002093
2	FPG	rs780094	2	27594741	GCKR	Saxena et al. 2010	Fasting Glucose	T	C	0.17953	0.00032306	0.0014482	0.82348	Genotyped	N/A	T	C	0.38954	-0.0046031	0.0012526	0.0002381	Genotyped	N/A	T	C	0.33476	-0.0056887	0.0018566	0.0021841	Genotyped	N/A	T	C	0.32258	-0.0038299	0.001403	0.0063388	Genotyped	N/A	NA	NA	NA	NA	NA	NA	t	c	-4.651	3.3e-06
1	1HPG	rs243021	2	60438323	BCL11A	Voight et al. 2010	Type 2 Diabetes	G	A	0.61488	0.0417	0.029037	0.15098	Genotyped	N/A	G	A	0.53072	-0.057011	0.048736	0.24208	Genotyped	N/A	G	A	0.43574	0.063781	0.069486	0.35868	Genotyped	N/A	G	A	0.40323	-0.042334	0.051214	0.40846	Genotyped	N/A	NA	NA	NA	NA	NA	NA	a	g	-0.026	0.9796
2	1HPG	rs243021	2	60438323	BCL11A	Voight et al. 2010	Type 2 Diabetes	G	A	0.61488	0.03754	0.028839	0.19301	Genotyped	N/A	G	A	0.53072	-0.043995	0.047418	0.3535	Genotyped	N/A	G	A	0.43574	0.066563	0.066961	0.3202	Genotyped	N/A	G	A	0.40323	-0.044081	0.050455	0.3823	Genotyped	N/A	NA	NA	NA	NA	NA	NA	a	g	-0.102	0.9187
1	2HPG	rs243021	2	60438323	BCL11A	Voight et al. 2010	Type 2 Diabetes	G	A	0.61488	0.031005	0.025338	0.22109	Genotyped	N/A	G	A	0.53072	-0.032431	0.039057	0.40635	Genotyped	N/A	G	A	0.43574	0.039973	0.053726	0.45687	Genotyped	N/A	G	A	0.40323	-0.11993	0.044716	0.007317	Genotyped	N/A	NA	NA	NA	NA	NA	NA	a	g	0.921	0.3569
2	2HPG	rs243021	2	60438323	BCL11A	Voight et al. 2010	Type 2 Diabetes	G	A	0.61488	0.027098	0.024812	0.27478	Genotyped	N/A	G	A	0.53072	-0.022745	0.038015	0.54963	Genotyped	N/A	G	A	0.43574	0.04158	0.052144	0.42522	Genotyped	N/A	G	A	0.40323	-0.12052	0.044207	0.0064046	Genotyped	N/A	NA	NA	NA	NA	NA	NA	a	g	0.857	0.3914
1	FCP	rs243021	2	60438323	BCL11A	Voight et al. 2010	Type 2 Diabetes	G	A	0.61502	-0.014746	0.0083253	0.07652	Genotyped	N/A	G	A	0.5312	-0.0022805	0.0064845	0.72508	Genotyped	N/A	G	A	0.43574	-0.01207	0.0082799	0.14493	Genotyped	N/A	G	A	0.40323	0.001487	0.0070446	0.83282	Genotyped	N/A	NA	NA	NA	NA	NA	NA	a	g	1.582	0.1136
2	FCP	rs243021	2	60438323	BCL11A	Voight et al. 2010	Type 2 Diabetes	G	A	0.61502	-0.010818	0.0074535	0.14666	Genotyped	N/A	G	A	0.5312	0.0027564	0.0054463	0.61279	Genotyped	N/A	G	A	0.43574	-0.011745	0.006635	0.07669	Genotyped	N/A	G	A	0.40323	-0.00041795	0.0062146	0.94638	Genotyped	N/A	NA	NA	NA	NA	NA	NA	a	g	1.227	0.2198
1	FPG	rs243021	2	60438323	BCL11A	Voight et al. 2010	Type 2 Diabetes	G	A	0.61488	-0.002325	0.0011836	0.049497	Genotyped	N/A	G	A	0.53072	-0.0015599	0.0013156	0.23575	Genotyped	N/A	G	A	0.43574	-0.00486	0.0018929	0.010243	Genotyped	N/A	G	A	0.40323	-0.0013931	0.00139	0.31622	Genotyped	N/A	NA	NA	NA	NA	NA	NA	a	g	3.243	0.001182
2	FPG	rs243021	2	60438323	BCL11A	Voight et al. 2010	Type 2 Diabetes	G	A	0.61488	-0.0020636	0.0011552	0.074055	Genotyped	N/A	G	A	0.53072	-0.00098833	0.0012438	0.42685	Genotyped	N/A	G	A	0.43574	-0.004761	0.0017336	0.0060267	Genotyped	N/A	G	A	0.40323	-0.0013966	0.0013251	0.2919	Genotyped	N/A	NA	NA	NA	NA	NA	NA	a	g	3.042	0.002352
1	1HPG	rs7560163	2	151346182	RBM43	Palmer et al. 2012	Type 2 Diabetes	NA	NA	NA	NA	NA	NA	N/A	N/A	NA	NA	NA	NA	NA	NA	N/A	N/A	NA	NA	NA	NA	NA	NA	N/A	N/A	NA	NA	NA	NA	NA	NA	N/A	N/A	NA	NA	NA	NA	NA	NA	NA	NA	NA	NA
2	1HPG	rs7560163	2	151346182	RBM43	Palmer et al. 2012	Type 2 Diabetes	NA	NA	NA	NA	NA	NA	N/A	N/A	NA	NA	NA	NA	NA	NA	N/A	N/A	NA	NA	NA	NA	NA	NA	N/A	N/A	NA	NA	NA	NA	NA	NA	N/A	N/A	NA	NA	NA	NA	NA	NA	NA	NA	NA	NA
1	2HPG	rs7560163	2	151346182	RBM43	Palmer et al. 2012	Type 2 Diabetes	NA	NA	NA	NA	NA	NA	N/A	N/A	NA	NA	NA	NA	NA	NA	N/A	N/A	NA	NA	NA	NA	NA	NA	N/A	N/A	NA	NA	NA	NA	NA	NA	N/A	N/A	NA	NA	NA	NA	NA	NA	NA	NA	NA	NA
2	2HPG	rs7560163	2	151346182	RBM43	Palmer et al. 2012	Type 2 Diabetes	NA	NA	NA	NA	NA	NA	N/A	N/A	NA	NA	NA	NA	NA	NA	N/A	N/A	NA	NA	NA	NA	NA	NA	N/A	N/A	NA	NA	NA	NA	NA	NA	N/A	N/A	NA	NA	NA	NA	NA	NA	NA	NA	NA	NA
1	FCP	rs7560163	2	151346182	RBM43	Palmer et al. 2012	Type 2 Diabetes	NA	NA	NA	NA	NA	NA	N/A	N/A	NA	NA	NA	NA	NA	NA	N/A	N/A	NA	NA	NA	NA	NA	NA	N/A	N/A	NA	NA	NA	NA	NA	NA	N/A	N/A	NA	NA	NA	NA	NA	NA	NA	NA	NA	NA
2	FCP	rs7560163	2	151346182	RBM43	Palmer et al. 2012	Type 2 Diabetes	NA	NA	NA	NA	NA	NA	N/A	N/A	NA	NA	NA	NA	NA	NA	N/A	N/A	NA	NA	NA	NA	NA	NA	N/A	N/A	NA	NA	NA	NA	NA	NA	N/A	N/A	NA	NA	NA	NA	NA	NA	NA	NA	NA	NA
1	FPG	rs7560163	2	151346182	RBM43	Palmer et al. 2012	Type 2 Diabetes	NA	NA	NA	NA	NA	NA	N/A	N/A	NA	NA	NA	NA	NA	NA	N/A	N/A	NA	NA	NA	NA	NA	NA	N/A	N/A	NA	NA	NA	NA	NA	NA	N/A	N/A	NA	NA	NA	NA	NA	NA	NA	NA	NA	NA
2	FPG	rs7560163	2	151346182	RBM43	Palmer et al. 2012	Type 2 Diabetes	NA	NA	NA	NA	NA	NA	N/A	N/A	NA	NA	NA	NA	NA	NA	N/A	N/A	NA	NA	NA	NA	NA	NA	N/A	N/A	NA	NA	NA	NA	NA	NA	N/A	N/A	NA	NA	NA	NA	NA	NA	NA	NA	NA	NA
1	1HPG	rs3923113	2	165210095	GRB14	Kooner et al. 2011	insulin sensitivity	C	A	0.70233	0.064175	0.030561	0.035736	Genotyped	N/A	C	A	0.36357	-0.013209	0.050377	0.79317	Genotyped	N/A	C	A	0.24908	0.030644	0.082454	0.71016	Genotyped	N/A	NA	NA	NA	NA	NA	NA	N/A	N/A	NA	NA	NA	NA	NA	NA	a	c	-1.222	0.2216
2	1HPG	rs3923113	2	165210095	GRB14	Kooner et al. 2011	insulin sensitivity	C	A	0.70233	0.069741	0.030352	0.021575	Genotyped	N/A	C	A	0.36357	-0.023173	0.049014	0.63637	Genotyped	N/A	C	A	0.24908	-0.0043433	0.079458	0.95641	Genotyped	N/A	NA	NA	NA	NA	NA	NA	N/A	N/A	NA	NA	NA	NA	NA	NA	a	c	-0.986	0.3241
1	2HPG	rs3923113	2	165210095	GRB14	Kooner et al. 2011	insulin sensitivity	C	A	0.70233	-0.024028	0.026668	0.36759	Genotyped	N/A	C	A	0.36357	-0.047223	0.040372	0.24212	Genotyped	N/A	C	A	0.24908	-0.036486	0.063752	0.56711	Genotyped	N/A	NA	NA	NA	NA	NA	NA	N/A	N/A	NA	NA	NA	NA	NA	NA	a	c	1.562	0.1184
2	2HPG	rs3923113	2	165210095	GRB14	Kooner et al. 2011	insulin sensitivity	C	A	0.70233	-0.015471	0.026114	0.55355	Genotyped	N/A	C	A	0.36357	-0.054202	0.039295	0.16778	Genotyped	N/A	C	A	0.24908	-0.067033	0.061876	0.27865	Genotyped	N/A	NA	NA	NA	NA	NA	NA	N/A	N/A	NA	NA	NA	NA	NA	NA	a	c	1.776	0.07573
1	FCP	rs3923113	2	165210095	GRB14	Kooner et al. 2011	insulin sensitivity	C	A	0.70282	0.0063843	0.0087515	0.46569	Genotyped	N/A	C	A	0.3638	-0.008921	0.006694	0.18264	Genotyped	N/A	C	A	0.24908	0.01488	0.0098252	0.1299	Genotyped	N/A	NA	NA	NA	NA	NA	NA	N/A	N/A	NA	NA	NA	NA	NA	NA	a	c	-0.315	0.7531
2	FCP	rs3923113	2	165210095	GRB14	Kooner et al. 2011	insulin sensitivity	C	A	0.70282	-0.00043684	0.0078352	0.95554	Genotyped	N/A	C	A	0.3638	-0.012266	0.0056223	0.02914	Genotyped	N/A	C	A	0.24908	0.0095265	0.0078732	0.22629	Genotyped	N/A	NA	NA	NA	NA	NA	NA	N/A	N/A	NA	NA	NA	NA	NA	NA	a	c	0.838	0.4019
1	FPG	rs3923113	2	165210095	GRB14	Kooner et al. 2011	insulin sensitivity	C	A	0.70233	-0.00098043	0.0012457	0.43126	Genotyped	N/A	C	A	0.36357	0.00055657	0.0013599	0.68234	Genotyped	N/A	C	A	0.24908	0.0063283	0.0022461	0.0048412	Genotyped	N/A	NA	NA	NA	NA	NA	NA	N/A	N/A	NA	NA	NA	NA	NA	NA	a	c	-1.224	0.2211
2	FPG	rs3923113	2	165210095	GRB14	Kooner et al. 2011	insulin sensitivity	C	A	0.70233	-0.0014507	0.0012158	0.2328	Genotyped	N/A	C	A	0.36357	0.00013912	0.0012857	0.91383	Genotyped	N/A	C	A	0.24908	0.0052525	0.0020571	0.01067	Genotyped	N/A	NA	NA	NA	NA	NA	NA	N/A	N/A	NA	NA	NA	NA	NA	NA	a	c	-0.663	0.5072
1	1HPG	rs7607980	2	165259447	COBLL1-GRB14	Manning et al. 2012	Fasting Insulin	T	C	0.83674	-0.026293	0.038939	0.49953	Genotyped	N/A	T	C	0.86467	0.018382	0.073684	0.803	Genotyped	N/A	T	C	0.916157	-0.03276	0.12267	0.78944	Genotyped	N/A	NA	NA	NA	NA	NA	NA	N/A	N/A	NA	NA	NA	NA	NA	NA	t	c	-0.36	0.7189
2	1HPG	rs7607980	2	165259447	COBLL1-GRB14	Manning et al. 2012	Fasting Insulin	T	C	0.83674	-0.026965	0.038673	0.48564	Genotyped	N/A	T	C	0.86467	0.044292	0.071691	0.53669	Genotyped	N/A	T	C	0.916157	-0.055432	0.11822	0.63914	Genotyped	N/A	NA	NA	NA	NA	NA	NA	N/A	N/A	NA	NA	NA	NA	NA	NA	t	c	-0.235	0.8141
1	2HPG	rs7607980	2	165259447	COBLL1-GRB14	Manning et al. 2012	Fasting Insulin	T	C	0.83674	0.058036	0.033979	0.087637	Genotyped	N/A	T	C	0.86467	0.13136	0.05905	0.026109	Genotyped	N/A	T	C	0.916157	0.10504	0.094851	0.26811	Genotyped	N/A	NA	NA	NA	NA	NA	NA	N/A	N/A	NA	NA	NA	NA	NA	NA	t	c	2.976	0.002919
2	2HPG	rs7607980	2	165259447	COBLL1-GRB14	Manning et al. 2012	Fasting Insulin	T	C	0.83674	0.050801	0.033273	0.12681	Genotyped	N/A	T	C	0.86467	0.1511	0.057475	0.0085666	Genotyped	N/A	T	C	0.916157	0.10598	0.092058	0.24963	Genotyped	N/A	NA	NA	NA	NA	NA	NA	N/A	N/A	NA	NA	NA	NA	NA	NA	t	c	3.156	0.0016
1	FCP	rs7607980	2	165259447	COBLL1-GRB14	Manning et al. 2012	Fasting Insulin	T	C	0.83709	-0.0076966	0.011174	0.49093	Genotyped	N/A	T	C	0.86454	0.019335	0.0097949	0.048381	Genotyped	N/A	T	C	0.916157	0.013233	0.014618	0.36533	Genotyped	N/A	NA	NA	NA	NA	NA	NA	N/A	N/A	NA	NA	NA	NA	NA	NA	t	c	1.339	0.1807
2	FCP	rs7607980	2	165259447	COBLL1-GRB14	Manning et al. 2012	Fasting Insulin	T	C	0.83709	-0.0055551	0.010004	0.57868	Genotyped	N/A	T	C	0.86454	0.027145	0.0082266	0.00096791	Genotyped	N/A	T	C	0.916157	0.0016251	0.011714	0.88966	Genotyped	N/A	NA	NA	NA	NA	NA	NA	N/A	N/A	NA	NA	NA	NA	NA	NA	t	c	1.89	0.05882
1	FPG	rs7607980	2	165259447	COBLL1-GRB14	Manning et al. 2012	Fasting Insulin	T	C	0.83674	-0.0013432	0.0015872	0.3974	Genotyped	N/A	T	C	0.86467	0.00068873	0.0019891	0.72915	Genotyped	N/A	T	C	0.916157	-0.00060214	0.0033418	0.85701	Genotyped	N/A	NA	NA	NA	NA	NA	NA	N/A	N/A	NA	NA	NA	NA	NA	NA	t	c	-0.352	0.7248
2	FPG	rs7607980	2	165259447	COBLL1-GRB14	Manning et al. 2012	Fasting Insulin	T	C	0.83674	-0.0010619	0.0015492	0.49306	Genotyped	N/A	T	C	0.86467	0.0016808	0.0018805	0.37143	Genotyped	N/A	T	C	0.916157	-0.0021001	0.0030606	0.4926	Genotyped	N/A	NA	NA	NA	NA	NA	NA	N/A	N/A	NA	NA	NA	NA	NA	NA	t	c	-0.158	0.8742
1	1HPG	rs560887	2	169471394	G6PC2	Dupuis et al. 2010	Fasting Glucose	T	C	0.040465	0.026142	0.066771	0.69542	Genotyped	N/A	T	C	0.29005	0.015108	0.055187	0.78427	Genotyped	N/A	T	C	0.13698	-0.080627	0.10107	0.42503	Genotyped	N/A	T	C	0.032258	0.038523	0.13997	0.78314	Genotyped	N/A	T	C	0.2909	0.06982	0.04505	0.1213	t	c	0.144	0.8854
2	1HPG	rs560887	2	169471394	G6PC2	Dupuis et al. 2010	Fasting Glucose	T	C	0.040465	0.012763	0.066314	0.84738	Genotyped	N/A	T	C	0.29005	0.027173	0.053694	0.61281	Genotyped	N/A	T	C	0.13698	-0.045711	0.097396	0.63883	Genotyped	N/A	T	C	0.032258	0.077042	0.13789	0.57636	Genotyped	N/A	T	C	0.2909	0.0515	0.04325	0.2339	t	c	0.462	0.644
1	2HPG	rs560887	2	169471394	G6PC2	Dupuis et al. 2010	Fasting Glucose	T	C	0.040465	0.069736	0.058266	0.23136	Genotyped	N/A	T	C	0.29005	-0.0010323	0.044227	0.98138	Genotyped	N/A	T	C	0.13698	-0.17368	0.078198	0.026348	Genotyped	N/A	T	C	0.032258	-0.048194	0.12221	0.69332	Genotyped	N/A	T	C	0.2909	-0.01347	0.03807	0.7235	t	c	-0.58	0.5618
2	2HPG	rs560887	2	169471394	G6PC2	Dupuis et al. 2010	Fasting Glucose	T	C	0.040465	0.061374	0.057055	0.28206	Genotyped	N/A	T	C	0.29005	0.0081313	0.043047	0.85018	Genotyped	N/A	T	C	0.13698	-0.15527	0.075882	0.040738	Genotyped	N/A	T	C	0.032258	-0.0082944	0.12082	0.94527	Genotyped	N/A	T	C	0.2909	-0.02766	0.03679	0.4523	t	c	-0.279	0.7802
1	FCP	rs560887	2	169471394	G6PC2	Dupuis et al. 2010	Fasting Glucose	T	C	0.040845	-0.014514	0.01908	0.44683	Genotyped	N/A	T	C	0.29001	-0.0026253	0.007348	0.72088	Genotyped	N/A	T	C	0.13698	-0.00061401	0.012054	0.95937	Genotyped	N/A	T	C	0.032258	0.031174	0.019253	0.10541	Genotyped	N/A	T	C	0.2909	0.006109	0.005962	0.3057	t	c	0.242	0.8086
2	FCP	rs560887	2	169471394	G6PC2	Dupuis et al. 2010	Fasting Glucose	T	C	0.040845	-0.0030519	0.017082	0.8582	Genotyped	N/A	T	C	0.29001	0.0032716	0.0061716	0.59604	Genotyped	N/A	T	C	0.13698	0.009525	0.0096594	0.32409	Genotyped	N/A	T	C	0.032258	0.035539	0.016985	0.036401	Genotyped	N/A	T	C	0.2909	0.0009773	0.004898	0.8419	t	c	1.71	0.0872
1	FPG	rs560887	2	169471394	G6PC2	Dupuis et al. 2010	Fasting Glucose	T	C	0.040465	-0.0032787	0.0027217	0.22834	Genotyped	N/A	T	C	0.29005	-0.0084441	0.0014897	1.4431e-08	Genotyped	N/A	T	C	0.13698	-0.0097791	0.0027532	0.00038251	Genotyped	N/A	T	C	0.032258	-0.0047032	0.0037988	0.21569	Genotyped	N/A	T	C	0.2909	-0.005378	0.00124	1.51e-05	t	c	-5.901	3.609e-09
2	FPG	rs560887	2	169471394	G6PC2	Dupuis et al. 2010	Fasting Glucose	T	C	0.040465	-0.0025902	0.0026565	0.32953	Genotyped	N/A	T	C	0.29005	-0.0077588	0.0014084	3.6141e-08	Genotyped	N/A	T	C	0.13698	-0.0082359	0.0025215	0.00109	Genotyped	N/A	T	C	0.032258	-0.0030563	0.0036216	0.39872	Genotyped	N/A	T	C	0.2909	-0.006071	0.001128	8.2e-08	t	c	-5.374	7.7e-08
1	1HPG	rs7578326	2	226728897	IRS1	Voight et al. 2010	Type 2 Diabetes	G	A	0.39862	-0.017479	0.027509	0.52518	Genotyped	N/A	G	A	0.34309	0.071094	0.050893	0.16243	Genotyped	N/A	G	A	0.26622	0.011753	0.077902	0.88008	Genotyped	N/A	G	A	0.14007	-0.034718	0.073243	0.63549	Genotyped	N/A	NA	NA	NA	NA	NA	NA	a	g	-0.283	0.7771
2	1HPG	rs7578326	2	226728897	IRS1	Voight et al. 2010	Type 2 Diabetes	G	A	0.39862	-0.017982	0.027321	0.51043	Genotyped	N/A	G	A	0.34309	0.075454	0.049516	0.12755	Genotyped	N/A	G	A	0.26622	0.015944	0.075072	0.83181	Genotyped	N/A	G	A	0.14007	-0.058616	0.072158	0.4166	Genotyped	N/A	NA	NA	NA	NA	NA	NA	a	g	-0.194	0.8458
1	2HPG	rs7578326	2	226728897	IRS1	Voight et al. 2010	Type 2 Diabetes	G	A	0.39862	-0.028192	0.024005	0.24022	Genotyped	N/A	G	A	0.34309	0.029878	0.040785	0.46382	Genotyped	N/A	G	A	0.26622	-0.032815	0.060233	0.58589	Genotyped	N/A	G	A	0.14007	-0.040777	0.06395	0.52371	Genotyped	N/A	NA	NA	NA	NA	NA	NA	a	g	0.734	0.4631
2	2HPG	rs7578326	2	226728897	IRS1	Voight et al. 2010	Type 2 Diabetes	G	A	0.39862	-0.034108	0.023506	0.14677	Genotyped	N/A	G	A	0.34309	0.032842	0.039697	0.40806	Genotyped	N/A	G	A	0.26622	-0.028302	0.05846	0.6283	Genotyped	N/A	G	A	0.14007	-0.057978	0.063223	0.35912	Genotyped	N/A	NA	NA	NA	NA	NA	NA	a	g	0.935	0.3496
1	FCP	rs7578326	2	226728897	IRS1	Voight et al. 2010	Type 2 Diabetes	G	A	0.40001	0.0055241	0.0078826	0.48343	Genotyped	N/A	G	A	0.34214	-7.0031e-05	0.0067782	0.99176	Genotyped	N/A	G	A	0.26622	0.0018337	0.0092828	0.84341	Genotyped	N/A	G	A	0.14007	0.024048	0.010075	0.016989	Genotyped	N/A	NA	NA	NA	NA	NA	NA	a	g	-1.655	0.09791
2	FCP	rs7578326	2	226728897	IRS1	Voight et al. 2010	Type 2 Diabetes	G	A	0.40001	0.0071574	0.0070571	0.31048	Genotyped	N/A	G	A	0.34214	0.0017552	0.005693	0.75785	Genotyped	N/A	G	A	0.26622	0.0024078	0.0074386	0.74618	Genotyped	N/A	G	A	0.14007	0.016733	0.0088878	0.059734	Genotyped	N/A	NA	NA	NA	NA	NA	NA	a	g	-1.78	0.07512
1	FPG	rs7578326	2	226728897	IRS1	Voight et al. 2010	Type 2 Diabetes	G	A	0.39862	0.0015248	0.0011213	0.1739	Genotyped	N/A	G	A	0.34309	0.0015093	0.0013738	0.27195	Genotyped	N/A	G	A	0.26622	0.0021744	0.0021221	0.30553	Genotyped	N/A	G	A	0.14007	0.0036708	0.0019879	0.064806	Genotyped	N/A	NA	NA	NA	NA	NA	NA	a	g	-2.67	0.007579
2	FPG	rs7578326	2	226728897	IRS1	Voight et al. 2010	Type 2 Diabetes	G	A	0.39862	0.0017534	0.0010944	0.10912	Genotyped	N/A	G	A	0.34309	0.0017456	0.0012988	0.17897	Genotyped	N/A	G	A	0.26622	0.0022819	0.0019436	0.24037	Genotyped	N/A	G	A	0.14007	0.0024461	0.0018951	0.19679	Genotyped	N/A	NA	NA	NA	NA	NA	NA	a	g	-2.703	0.006862
1	1HPG	rs2943634	2	226776324	IRS1	Manning et al. 2012	Fasting Insulin	C	A	0.42144	-0.011094	0.028963	0.70169	Imputed	0.921	C	A	0.67046	-0.071953	0.05184	0.16514	Imputed	0.991	C	A	0.79668	0.12454	0.086729	0.151	Imputed	0.986	C	A	0.87436	-0.030739	0.07657	0.68809	Genotyped	N/A	NA	NA	NA	NA	NA	NA	a	c	0.55	0.5826
2	1HPG	rs2943634	2	226776324	IRS1	Manning et al. 2012	Fasting Insulin	C	A	0.42144	-0.0095937	0.028755	0.73866	Imputed	0.921	C	A	0.67046	-0.069438	0.050437	0.16859	Imputed	0.991	C	A	0.79668	0.10467	0.083545	0.21025	Imputed	0.986	C	A	0.87436	-0.017345	0.075435	0.81815	Genotyped	N/A	NA	NA	NA	NA	NA	NA	a	c	0.509	0.6106
1	2HPG	rs2943634	2	226776324	IRS1	Manning et al. 2012	Fasting Insulin	C	A	0.42144	0.015596	0.02547	0.54031	Imputed	0.921	C	A	0.67046	-0.046527	0.041552	0.26283	Imputed	0.991	C	A	0.79668	0.098569	0.067157	0.14217	Imputed	0.986	C	A	0.87436	0.005517	0.066855	0.93423	Genotyped	N/A	NA	NA	NA	NA	NA	NA	a	c	-0.352	0.7247
2	2HPG	rs2943634	2	226776324	IRS1	Manning et al. 2012	Fasting Insulin	C	A	0.42144	0.020581	0.024913	0.40876	Imputed	0.921	C	A	0.67046	-0.044914	0.040449	0.26683	Imputed	0.991	C	A	0.79668	0.076972	0.065148	0.23741	Imputed	0.986	C	A	0.87436	0.014477	0.066094	0.82662	Genotyped	N/A	NA	NA	NA	NA	NA	NA	a	c	-0.41	0.6817
1	FCP	rs2943634	2	226776324	IRS1	Manning et al. 2012	Fasting Insulin	C	A	0.42189	0.0055045	0.0083516	0.50984	Imputed	0.921	C	A	0.67108	-0.0014779	0.0069062	0.83055	Imputed	0.991	C	A	0.79668	0.0049926	0.010317	0.62844	Imputed	0.986	C	A	0.87436	-0.014472	0.010532	0.16942	Genotyped	N/A	NA	NA	NA	NA	NA	NA	a	c	0.297	0.7668
2	FCP	rs2943634	2	226776324	IRS1	Manning et al. 2012	Fasting Insulin	C	A	0.42189	0.0031212	0.0074884	0.67682	Imputed	0.921	C	A	0.67108	-0.00062109	0.0058006	0.91473	Imputed	0.991	C	A	0.79668	0.0028946	0.0082678	0.72626	Imputed	0.986	C	A	0.87436	-0.008998	0.0092914	0.33284	Genotyped	N/A	NA	NA	NA	NA	NA	NA	a	c	0.204	0.8382
1	FPG	rs2943634	2	226776324	IRS1	Manning et al. 2012	Fasting Insulin	C	A	0.42144	-0.00023988	0.0011899	0.84023	Imputed	0.921	C	A	0.67046	-0.001168	0.0013992	0.40384	Imputed	0.991	C	A	0.79668	0.00015147	0.0023603	0.94883	Imputed	0.986	C	A	0.87436	-0.00029346	0.0020782	0.8877	Genotyped	N/A	NA	NA	NA	NA	NA	NA	a	c	0.608	0.5433
2	FPG	rs2943634	2	226776324	IRS1	Manning et al. 2012	Fasting Insulin	C	A	0.42144	-0.00046418	0.0011594	0.68888	Imputed	0.921	C	A	0.67046	-0.0010772	0.001323	0.41551	Imputed	0.991	C	A	0.79668	-0.0003257	0.0021615	0.88023	Imputed	0.986	C	A	0.87436	0.00030788	0.0019812	0.87651	Genotyped	N/A	NA	NA	NA	NA	NA	NA	a	c	0.634	0.5263
1	1HPG	rs831571	3	64023337	PSMD6	Cho et al. 2012	Type 2 Diabetes	T	C	0.19488	-0.033835	0.034241	0.32308	Genotyped	N/A	T	C	0.19203	-0.02329	0.063006	0.71164	Genotyped	N/A	T	C	0.092411	-0.026539	0.12311	0.82932	Genotyped	N/A	T	C	0.3691	-0.033105	0.053146	0.53335	Imputed	0.948	NA	NA	NA	NA	NA	NA	t	c	-1.105	0.2691
2	1HPG	rs831571	3	64023337	PSMD6	Cho et al. 2012	Type 2 Diabetes	T	C	0.19488	-0.028193	0.034007	0.40707	Genotyped	N/A	T	C	0.19203	-0.017813	0.061301	0.77137	Genotyped	N/A	T	C	0.092411	-0.085455	0.11864	0.47134	Genotyped	N/A	T	C	0.3691	-0.04105	0.05234	0.43286	Imputed	0.948	NA	NA	NA	NA	NA	NA	t	c	-1.283	0.1996
1	2HPG	rs831571	3	64023337	PSMD6	Cho et al. 2012	Type 2 Diabetes	T	C	0.19488	-0.0071156	0.029879	0.81177	Genotyped	N/A	T	C	0.19203	-0.0021602	0.050493	0.96587	Genotyped	N/A	T	C	0.092411	-0.0095223	0.095188	0.92032	Genotyped	N/A	T	C	0.3691	-0.052741	0.046311	0.25477	Imputed	0.948	NA	NA	NA	NA	NA	NA	t	c	-0.771	0.4409
2	2HPG	rs831571	3	64023337	PSMD6	Cho et al. 2012	Type 2 Diabetes	T	C	0.19488	-0.0083323	0.029258	0.77581	Genotyped	N/A	T	C	0.19203	0.00086128	0.049146	0.98602	Genotyped	N/A	T	C	0.092411	-0.047535	0.092386	0.60688	Genotyped	N/A	T	C	0.3691	-0.055738	0.045762	0.22322	Imputed	0.948	NA	NA	NA	NA	NA	NA	t	c	-0.979	0.3277
1	FCP	rs831571	3	64023337	PSMD6	Cho et al. 2012	Type 2 Diabetes	T	C	0.19484	0.019275	0.0098144	0.049539	Genotyped	N/A	T	C	0.192	-0.0238	0.0083761	0.0044909	Genotyped	N/A	T	C	0.092411	0.0061253	0.01467	0.67628	Genotyped	N/A	T	C	0.3691	-0.00079637	0.0072794	0.91288	Imputed	0.948	NA	NA	NA	NA	NA	NA	t	c	-0.49	0.624
2	FCP	rs831571	3	64023337	PSMD6	Cho et al. 2012	Type 2 Diabetes	T	C	0.19484	0.015953	0.0087868	0.069438	Genotyped	N/A	T	C	0.192	-0.019552	0.0070351	0.0054478	Genotyped	N/A	T	C	0.092411	-0.0086735	0.011755	0.46062	Genotyped	N/A	T	C	0.3691	-0.0063376	0.0064154	0.32322	Imputed	0.948	NA	NA	NA	NA	NA	NA	t	c	-1.478	0.1393
1	FPG	rs831571	3	64023337	PSMD6	Cho et al. 2012	Type 2 Diabetes	T	C	0.19488	0.0012332	0.0013957	0.37693	Genotyped	N/A	T	C	0.19203	-0.0037444	0.0017008	0.027694	Genotyped	N/A	T	C	0.092411	0.00062013	0.0033537	0.8533	Genotyped	N/A	T	C	0.3691	-0.00019475	0.0014408	0.89248	Imputed	0.948	NA	NA	NA	NA	NA	NA	t	c	-0.777	0.4369
2	FPG	rs831571	3	64023337	PSMD6	Cho et al. 2012	Type 2 Diabetes	T	C	0.19488	0.0011146	0.0013623	0.41324	Genotyped	N/A	T	C	0.19203	-0.0032666	0.001608	0.042207	Genotyped	N/A	T	C	0.092411	-0.0017322	0.0030715	0.57278	Genotyped	N/A	T	C	0.3691	-0.00050946	0.0013729	0.71057	Imputed	0.948	NA	NA	NA	NA	NA	NA	t	c	-1.158	0.2468
1	1HPG	rs11708067	3	124548468	ADCY5	Dupuis et al. 2010	Fasting Glucose	NA	NA	NA	NA	NA	NA	N/A	N/A	NA	NA	NA	NA	NA	NA	N/A	N/A	NA	NA	NA	NA	NA	NA	N/A	N/A	G	A	0.020232	-0.1697	0.17789	0.34009	Genotyped	N/A	NA	NA	NA	NA	NA	NA	a	g	0.954	0.3401
2	1HPG	rs11708067	3	124548468	ADCY5	Dupuis et al. 2010	Fasting Glucose	NA	NA	NA	NA	NA	NA	N/A	N/A	NA	NA	NA	NA	NA	NA	N/A	N/A	NA	NA	NA	NA	NA	NA	N/A	N/A	G	A	0.020232	-0.17084	0.17527	0.3297	Genotyped	N/A	NA	NA	NA	NA	NA	NA	a	g	0.975	0.3297
1	2HPG	rs11708067	3	124548468	ADCY5	Dupuis et al. 2010	Fasting Glucose	NA	NA	NA	NA	NA	NA	N/A	N/A	NA	NA	NA	NA	NA	NA	N/A	N/A	NA	NA	NA	NA	NA	NA	N/A	N/A	G	A	0.020232	0.0062985	0.15538	0.96767	Genotyped	N/A	NA	NA	NA	NA	NA	NA	a	g	-0.041	0.9677
2	2HPG	rs11708067	3	124548468	ADCY5	Dupuis et al. 2010	Fasting Glucose	NA	NA	NA	NA	NA	NA	N/A	N/A	NA	NA	NA	NA	NA	NA	N/A	N/A	NA	NA	NA	NA	NA	NA	N/A	N/A	G	A	0.020232	0.00017508	0.15364	0.99909	Genotyped	N/A	NA	NA	NA	NA	NA	NA	a	g	-0.001	0.9991
1	FCP	rs11708067	3	124548468	ADCY5	Dupuis et al. 2010	Fasting Glucose	NA	NA	NA	NA	NA	NA	N/A	N/A	NA	NA	NA	NA	NA	NA	N/A	N/A	NA	NA	NA	NA	NA	NA	N/A	N/A	G	A	0.020232	-0.0049653	0.024503	0.83942	Genotyped	N/A	NA	NA	NA	NA	NA	NA	a	g	0.203	0.8394
2	FCP	rs11708067	3	124548468	ADCY5	Dupuis et al. 2010	Fasting Glucose	NA	NA	NA	NA	NA	NA	N/A	N/A	NA	NA	NA	NA	NA	NA	N/A	N/A	NA	NA	NA	NA	NA	NA	N/A	N/A	G	A	0.020232	-0.0016772	0.02159	0.93808	Genotyped	N/A	NA	NA	NA	NA	NA	NA	a	g	0.078	0.9381
1	FPG	rs11708067	3	124548468	ADCY5	Dupuis et al. 2010	Fasting Glucose	NA	NA	NA	NA	NA	NA	N/A	N/A	NA	NA	NA	NA	NA	NA	N/A	N/A	NA	NA	NA	NA	NA	NA	N/A	N/A	G	A	0.020232	-0.0025507	0.0048288	0.59735	Genotyped	N/A	NA	NA	NA	NA	NA	NA	a	g	0.528	0.5973
2	FPG	rs11708067	3	124548468	ADCY5	Dupuis et al. 2010	Fasting Glucose	NA	NA	NA	NA	NA	NA	N/A	N/A	NA	NA	NA	NA	NA	NA	N/A	N/A	NA	NA	NA	NA	NA	NA	N/A	N/A	G	A	0.020232	-0.0025073	0.0046076	0.58633	Genotyped	N/A	NA	NA	NA	NA	NA	NA	a	g	0.544	0.5863
1	1HPG	rs2877716	3	124577141	ADCY5	Saxena et al. 2010	2-hr Glucose	T	C	0.2428	-0.027012	0.031296	0.38808	Genotyped	N/A	T	C	0.24762	0.056801	0.055674	0.30762	Genotyped	N/A	T	C	0.30722	-0.08502	0.077413	0.27209	Genotyped	N/A	T	C	0.019949	-0.095264	0.18295	0.60258	Genotyped	N/A	NA	NA	NA	NA	NA	NA	t	c	-0.598	0.5498
2	1HPG	rs2877716	3	124577141	ADCY5	Saxena et al. 2010	2-hr Glucose	T	C	0.2428	-0.031259	0.031082	0.31457	Genotyped	N/A	T	C	0.24762	0.049515	0.054169	0.36067	Genotyped	N/A	T	C	0.30722	-0.096424	0.0746	0.19617	Genotyped	N/A	T	C	0.019949	-0.091502	0.18024	0.61169	Genotyped	N/A	NA	NA	NA	NA	NA	NA	t	c	-0.804	0.4215
1	2HPG	rs2877716	3	124577141	ADCY5	Saxena et al. 2010	2-hr Glucose	T	C	0.2428	0.0050193	0.027311	0.85419	Genotyped	N/A	T	C	0.24762	-0.085691	0.044617	0.054787	Genotyped	N/A	T	C	0.30722	-0.0375	0.059854	0.53097	Genotyped	N/A	T	C	0.019949	0.051522	0.15974	0.74705	Genotyped	N/A	NA	NA	NA	NA	NA	NA	t	c	-1.078	0.2809
2	2HPG	rs2877716	3	124577141	ADCY5	Saxena et al. 2010	2-hr Glucose	T	C	0.2428	0.0057597	0.026744	0.82948	Genotyped	N/A	T	C	0.24762	-0.092063	0.043427	0.034011	Genotyped	N/A	T	C	0.30722	-0.034676	0.058092	0.55057	Genotyped	N/A	T	C	0.019949	0.052051	0.15792	0.74171	Genotyped	N/A	NA	NA	NA	NA	NA	NA	t	c	-1.157	0.2473
1	FCP	rs2877716	3	124577141	ADCY5	Saxena et al. 2010	2-hr Glucose	T	C	0.2432	0.0078514	0.0089662	0.38121	Genotyped	N/A	T	C	0.2478	0.0085042	0.0073994	0.25043	Genotyped	N/A	T	C	0.30722	0.00069035	0.0092244	0.94034	Genotyped	N/A	T	C	0.019949	-0.0073249	0.025166	0.771	Genotyped	N/A	NA	NA	NA	NA	NA	NA	t	c	0.95	0.3424
2	FCP	rs2877716	3	124577141	ADCY5	Saxena et al. 2010	2-hr Glucose	T	C	0.2432	0.010076	0.0080276	0.20943	Genotyped	N/A	T	C	0.2478	0.0071601	0.0062147	0.24927	Genotyped	N/A	T	C	0.30722	-0.0062152	0.0073919	0.40045	Genotyped	N/A	T	C	0.019949	-0.0043896	0.022201	0.84326	Genotyped	N/A	NA	NA	NA	NA	NA	NA	t	c	0.792	0.4284
1	FPG	rs2877716	3	124577141	ADCY5	Saxena et al. 2010	2-hr Glucose	T	C	0.2428	0.00059718	0.0012757	0.63971	Genotyped	N/A	T	C	0.24762	-0.00030459	0.0015029	0.8394	Genotyped	N/A	T	C	0.30722	-0.0047324	0.0021088	0.024825	Genotyped	N/A	T	C	0.019949	-0.00096165	0.0049655	0.84644	Genotyped	N/A	NA	NA	NA	NA	NA	NA	t	c	-0.945	0.3447
2	FPG	rs2877716	3	124577141	ADCY5	Saxena et al. 2010	2-hr Glucose	T	C	0.2428	0.00069285	0.0012452	0.57792	Genotyped	N/A	T	C	0.24762	-0.00047664	0.0014209	0.73729	Genotyped	N/A	T	C	0.30722	-0.0055829	0.0019313	0.0038442	Genotyped	N/A	T	C	0.019949	-0.00075934	0.0047338	0.87256	Genotyped	N/A	NA	NA	NA	NA	NA	NA	t	c	-1.235	0.2167
1	1HPG	rs1470579	3	187011774	IGF2BP2	Saxena et al. 2012	Type 2 Diabetes	C	A	0.79442	0.092934	0.03461	0.0072494	Genotyped	N/A	C	A	0.32547	0.035573	0.051969	0.49366	Genotyped	N/A	C	A	0.24847	0.03764	0.080027	0.63811	Genotyped	N/A	C	A	0.28481	0.076042	0.055818	0.17309	Genotyped	N/A	NA	NA	NA	NA	NA	NA	a	c	-2.605	0.009176
2	1HPG	rs1470579	3	187011774	IGF2BP2	Saxena et al. 2012	Type 2 Diabetes	C	A	0.79442	0.091849	0.034373	0.0075377	Genotyped	N/A	C	A	0.32547	0.015039	0.050561	0.76612	Genotyped	N/A	C	A	0.24847	0.058241	0.077119	0.45012	Genotyped	N/A	C	A	0.28481	0.083656	0.05499	0.12819	Genotyped	N/A	NA	NA	NA	NA	NA	NA	a	c	-2.588	0.009645
1	2HPG	rs1470579	3	187011774	IGF2BP2	Saxena et al. 2012	Type 2 Diabetes	C	A	0.79442	-0.013973	0.030201	0.6436	Genotyped	N/A	C	A	0.32547	0.038779	0.041648	0.3518	Genotyped	N/A	C	A	0.24847	0.074366	0.061876	0.22942	Genotyped	N/A	C	A	0.28481	0.053344	0.048735	0.27371	Genotyped	N/A	NA	NA	NA	NA	NA	NA	a	c	-1.369	0.1711
2	2HPG	rs1470579	3	187011774	IGF2BP2	Saxena et al. 2012	Type 2 Diabetes	C	A	0.79442	-0.012347	0.029574	0.67632	Genotyped	N/A	C	A	0.32547	0.022308	0.040534	0.58209	Genotyped	N/A	C	A	0.24847	0.088945	0.060054	0.13859	Genotyped	N/A	C	A	0.28481	0.061927	0.048181	0.19869	Genotyped	N/A	NA	NA	NA	NA	NA	NA	a	c	-1.398	0.1622
1	FCP	rs1470579	3	187011774	IGF2BP2	Saxena et al. 2012	Type 2 Diabetes	C	A	0.79296	-0.0069891	0.0099134	0.4808	Genotyped	N/A	C	A	0.32593	-0.0034595	0.0069079	0.61651	Genotyped	N/A	C	A	0.24847	0.013501	0.009536	0.15684	Genotyped	N/A	C	A	0.28481	0.0031987	0.0076779	0.67696	Genotyped	N/A	NA	NA	NA	NA	NA	NA	a	c	-0.2	0.8418
2	FCP	rs1470579	3	187011774	IGF2BP2	Saxena et al. 2012	Type 2 Diabetes	C	A	0.79296	-0.0065607	0.0088753	0.45978	Genotyped	N/A	C	A	0.32593	-0.0084997	0.0058021	0.14294	Genotyped	N/A	C	A	0.24847	0.018249	0.0076415	0.016934	Genotyped	N/A	C	A	0.28481	0.0039218	0.0067733	0.56259	Genotyped	N/A	NA	NA	NA	NA	NA	NA	a	c	-0.15	0.8811
1	FPG	rs1470579	3	187011774	IGF2BP2	Saxena et al. 2012	Type 2 Diabetes	C	A	0.79442	-0.0021737	0.0014108	0.12337	Genotyped	N/A	C	A	0.32547	-0.0010475	0.0014028	0.45521	Genotyped	N/A	C	A	0.24847	0.0029869	0.00218	0.17065	Genotyped	N/A	C	A	0.28481	-0.00052701	0.0015149	0.72793	Genotyped	N/A	NA	NA	NA	NA	NA	NA	a	c	0.764	0.4447
2	FPG	rs1470579	3	187011774	IGF2BP2	Saxena et al. 2012	Type 2 Diabetes	C	A	0.79442	-0.0022013	0.0013769	0.10989	Genotyped	N/A	C	A	0.32547	-0.0016841	0.0013263	0.20416	Genotyped	N/A	C	A	0.24847	0.0037631	0.0019966	0.059458	Genotyped	N/A	C	A	0.28481	-0.00025077	0.0014442	0.86215	Genotyped	N/A	NA	NA	NA	NA	NA	NA	a	c	0.772	0.4399
1	1HPG	rs16861329	3	188149155	ST6GAL1	Kooner et al. 2011	Type 2 Diabetes	T	C	0.072093	-0.098519	0.052517	0.060665	Genotyped	N/A	T	C	0.16642	0.0045491	0.066512	0.94547	Genotyped	N/A	T	C	0.30845	-0.0079706	0.07357	0.91373	Genotyped	N/A	T	C	0.20605	-0.04161	0.062682	0.5068	Imputed	0.985	NA	NA	NA	NA	NA	NA	t	c	-1.274	0.2027
2	1HPG	rs16861329	3	188149155	ST6GAL1	Kooner et al. 2011	Type 2 Diabetes	T	C	0.072093	-0.098738	0.052158	0.058351	Genotyped	N/A	T	C	0.16642	0.042968	0.064713	0.5067	Genotyped	N/A	T	C	0.30845	-0.0033214	0.070897	0.96263	Genotyped	N/A	T	C	0.20605	-0.041843	0.061779	0.49822	Imputed	0.985	NA	NA	NA	NA	NA	NA	t	c	-0.932	0.3512
1	2HPG	rs16861329	3	188149155	ST6GAL1	Kooner et al. 2011	Type 2 Diabetes	T	C	0.072093	0.080502	0.045827	0.07898	Genotyped	N/A	T	C	0.16642	-0.072119	0.053302	0.17605	Genotyped	N/A	T	C	0.30845	-0.020968	0.056884	0.71242	Genotyped	N/A	T	C	0.20605	-0.064172	0.054738	0.24106	Imputed	0.985	NA	NA	NA	NA	NA	NA	t	c	-0.649	0.5166
2	2HPG	rs16861329	3	188149155	ST6GAL1	Kooner et al. 2011	Type 2 Diabetes	T	C	0.072093	0.062813	0.044875	0.1616	Genotyped	N/A	T	C	0.16642	-0.040415	0.05188	0.43598	Genotyped	N/A	T	C	0.30845	-0.019654	0.055209	0.72184	Genotyped	N/A	T	C	0.20605	-0.064215	0.054115	0.23537	Imputed	0.985	NA	NA	NA	NA	NA	NA	t	c	-0.508	0.6117
1	FCP	rs16861329	3	188149155	ST6GAL1	Kooner et al. 2011	Type 2 Diabetes	T	C	0.071831	-0.00095405	0.015084	0.94957	Genotyped	N/A	T	C	0.16667	-0.015783	0.0088399	0.074194	Genotyped	N/A	T	C	0.30845	-0.017177	0.0087666	0.050071	Genotyped	N/A	T	C	0.20605	-0.0033673	0.0086555	0.69725	Imputed	0.985	NA	NA	NA	NA	NA	NA	t	c	-2.065	0.03893
2	FCP	rs16861329	3	188149155	ST6GAL1	Kooner et al. 2011	Type 2 Diabetes	T	C	0.071831	0.0075987	0.013505	0.57366	Genotyped	N/A	T	C	0.16667	-0.0051617	0.0074246	0.48692	Genotyped	N/A	T	C	0.30845	-0.015363	0.007025	0.028747	Genotyped	N/A	T	C	0.20605	-0.0013032	0.0076322	0.86442	Imputed	0.985	NA	NA	NA	NA	NA	NA	t	c	-1.138	0.2552
1	FPG	rs16861329	3	188149155	ST6GAL1	Kooner et al. 2011	Type 2 Diabetes	T	C	0.072093	-7.4117e-05	0.0021407	0.97238	Genotyped	N/A	T	C	0.16642	0.0010841	0.0017954	0.54598	Genotyped	N/A	T	C	0.30845	0.00050922	0.0020041	0.79943	Genotyped	N/A	T	C	0.20605	0.0015729	0.0017021	0.35545	Imputed	0.985	NA	NA	NA	NA	NA	NA	t	c	0.903	0.3664
2	FPG	rs16861329	3	188149155	ST6GAL1	Kooner et al. 2011	Type 2 Diabetes	T	C	0.072093	0.00057267	0.0020894	0.78402	Genotyped	N/A	T	C	0.16642	0.0024251	0.0016975	0.1531	Genotyped	N/A	T	C	0.30845	0.00075928	0.0018355	0.67912	Genotyped	N/A	T	C	0.20605	0.0013255	0.0016222	0.41389	Imputed	0.985	NA	NA	NA	NA	NA	NA	t	c	1.526	0.1269
1	1HPG	rs7656416	4	1244535	MGC21675	Imamura et al. 2012	Type 2 Diabetes	NA	NA	NA	NA	NA	NA	N/A	N/A	NA	NA	NA	NA	NA	NA	N/A	N/A	NA	NA	NA	NA	NA	NA	N/A	N/A	NA	NA	NA	NA	NA	NA	N/A	N/A	NA	NA	NA	NA	NA	NA	NA	NA	NA	NA
2	1HPG	rs7656416	4	1244535	MGC21675	Imamura et al. 2012	Type 2 Diabetes	NA	NA	NA	NA	NA	NA	N/A	N/A	NA	NA	NA	NA	NA	NA	N/A	N/A	NA	NA	NA	NA	NA	NA	N/A	N/A	NA	NA	NA	NA	NA	NA	N/A	N/A	NA	NA	NA	NA	NA	NA	NA	NA	NA	NA
1	2HPG	rs7656416	4	1244535	MGC21675	Imamura et al. 2012	Type 2 Diabetes	NA	NA	NA	NA	NA	NA	N/A	N/A	NA	NA	NA	NA	NA	NA	N/A	N/A	NA	NA	NA	NA	NA	NA	N/A	N/A	NA	NA	NA	NA	NA	NA	N/A	N/A	NA	NA	NA	NA	NA	NA	NA	NA	NA	NA
2	2HPG	rs7656416	4	1244535	MGC21675	Imamura et al. 2012	Type 2 Diabetes	NA	NA	NA	NA	NA	NA	N/A	N/A	NA	NA	NA	NA	NA	NA	N/A	N/A	NA	NA	NA	NA	NA	NA	N/A	N/A	NA	NA	NA	NA	NA	NA	N/A	N/A	NA	NA	NA	NA	NA	NA	NA	NA	NA	NA
1	FCP	rs7656416	4	1244535	MGC21675	Imamura et al. 2012	Type 2 Diabetes	NA	NA	NA	NA	NA	NA	N/A	N/A	NA	NA	NA	NA	NA	NA	N/A	N/A	NA	NA	NA	NA	NA	NA	N/A	N/A	NA	NA	NA	NA	NA	NA	N/A	N/A	NA	NA	NA	NA	NA	NA	NA	NA	NA	NA
2	FCP	rs7656416	4	1244535	MGC21675	Imamura et al. 2012	Type 2 Diabetes	NA	NA	NA	NA	NA	NA	N/A	N/A	NA	NA	NA	NA	NA	NA	N/A	N/A	NA	NA	NA	NA	NA	NA	N/A	N/A	NA	NA	NA	NA	NA	NA	N/A	N/A	NA	NA	NA	NA	NA	NA	NA	NA	NA	NA
1	FPG	rs7656416	4	1244535	MGC21675	Imamura et al. 2012	Type 2 Diabetes	NA	NA	NA	NA	NA	NA	N/A	N/A	NA	NA	NA	NA	NA	NA	N/A	N/A	NA	NA	NA	NA	NA	NA	N/A	N/A	NA	NA	NA	NA	NA	NA	N/A	N/A	NA	NA	NA	NA	NA	NA	NA	NA	NA	NA
2	FPG	rs7656416	4	1244535	MGC21675	Imamura et al. 2012	Type 2 Diabetes	NA	NA	NA	NA	NA	NA	N/A	N/A	NA	NA	NA	NA	NA	NA	N/A	N/A	NA	NA	NA	NA	NA	NA	N/A	N/A	NA	NA	NA	NA	NA	NA	N/A	N/A	NA	NA	NA	NA	NA	NA	NA	NA	NA	NA
1	1HPG	rs6815464	4	1299901	MAEA	Cho et al. 2012	Type 2 Diabetes	NA	NA	NA	NA	NA	NA	N/A	N/A	NA	NA	NA	NA	NA	NA	N/A	N/A	NA	NA	NA	NA	NA	NA	N/A	N/A	NA	NA	NA	NA	NA	NA	N/A	N/A	NA	NA	NA	NA	NA	NA	NA	NA	NA	NA
2	1HPG	rs6815464	4	1299901	MAEA	Cho et al. 2012	Type 2 Diabetes	NA	NA	NA	NA	NA	NA	N/A	N/A	NA	NA	NA	NA	NA	NA	N/A	N/A	NA	NA	NA	NA	NA	NA	N/A	N/A	NA	NA	NA	NA	NA	NA	N/A	N/A	NA	NA	NA	NA	NA	NA	NA	NA	NA	NA
1	2HPG	rs6815464	4	1299901	MAEA	Cho et al. 2012	Type 2 Diabetes	NA	NA	NA	NA	NA	NA	N/A	N/A	NA	NA	NA	NA	NA	NA	N/A	N/A	NA	NA	NA	NA	NA	NA	N/A	N/A	NA	NA	NA	NA	NA	NA	N/A	N/A	NA	NA	NA	NA	NA	NA	NA	NA	NA	NA
2	2HPG	rs6815464	4	1299901	MAEA	Cho et al. 2012	Type 2 Diabetes	NA	NA	NA	NA	NA	NA	N/A	N/A	NA	NA	NA	NA	NA	NA	N/A	N/A	NA	NA	NA	NA	NA	NA	N/A	N/A	NA	NA	NA	NA	NA	NA	N/A	N/A	NA	NA	NA	NA	NA	NA	NA	NA	NA	NA
1	FCP	rs6815464	4	1299901	MAEA	Cho et al. 2012	Type 2 Diabetes	NA	NA	NA	NA	NA	NA	N/A	N/A	NA	NA	NA	NA	NA	NA	N/A	N/A	NA	NA	NA	NA	NA	NA	N/A	N/A	NA	NA	NA	NA	NA	NA	N/A	N/A	NA	NA	NA	NA	NA	NA	NA	NA	NA	NA
2	FCP	rs6815464	4	1299901	MAEA	Cho et al. 2012	Type 2 Diabetes	NA	NA	NA	NA	NA	NA	N/A	N/A	NA	NA	NA	NA	NA	NA	N/A	N/A	NA	NA	NA	NA	NA	NA	N/A	N/A	NA	NA	NA	NA	NA	NA	N/A	N/A	NA	NA	NA	NA	NA	NA	NA	NA	NA	NA
1	FPG	rs6815464	4	1299901	MAEA	Cho et al. 2012	Type 2 Diabetes	NA	NA	NA	NA	NA	NA	N/A	N/A	NA	NA	NA	NA	NA	NA	N/A	N/A	NA	NA	NA	NA	NA	NA	N/A	N/A	NA	NA	NA	NA	NA	NA	N/A	N/A	NA	NA	NA	NA	NA	NA	NA	NA	NA	NA
2	FPG	rs6815464	4	1299901	MAEA	Cho et al. 2012	Type 2 Diabetes	NA	NA	NA	NA	NA	NA	N/A	N/A	NA	NA	NA	NA	NA	NA	N/A	N/A	NA	NA	NA	NA	NA	NA	N/A	N/A	NA	NA	NA	NA	NA	NA	N/A	N/A	NA	NA	NA	NA	NA	NA	NA	NA	NA	NA
1	1HPG	rs4691380	4	157939574	PDGFC	Manning et al. 2012	Fasting Insulin	T	C	0.75489	-0.0072366	0.032664	0.82467	Imputed	0.994	T	C	0.33231	-0.040729	0.052415	0.43713	Imputed	0.936	T	C	0.36826	-0.028645	0.074214	0.69951	Imputed	0.984	T	C	0.3818	-0.0089348	0.053575	0.86755	Imputed	0.967	NA	NA	NA	NA	NA	NA	t	c	-0.792	0.4284
2	1HPG	rs4691380	4	157939574	PDGFC	Manning et al. 2012	Fasting Insulin	T	C	0.75489	-0.0020375	0.032447	0.94993	Imputed	0.994	T	C	0.33231	-0.052038	0.051024	0.30779	Imputed	0.936	T	C	0.36826	-0.020511	0.071514	0.77426	Imputed	0.984	T	C	0.3818	-0.0057397	0.052774	0.91339	Imputed	0.967	NA	NA	NA	NA	NA	NA	t	c	-0.776	0.4377
1	2HPG	rs4691380	4	157939574	PDGFC	Manning et al. 2012	Fasting Insulin	T	C	0.75489	0.015037	0.028514	0.59794	Imputed	0.994	T	C	0.33231	-0.04559	0.041907	0.27665	Imputed	0.936	T	C	0.36826	0.061979	0.05733	0.27965	Imputed	0.984	T	C	0.3818	-0.011241	0.046857	0.81041	Imputed	0.967	NA	NA	NA	NA	NA	NA	t	c	-0.004	0.9968
2	2HPG	rs4691380	4	157939574	PDGFC	Manning et al. 2012	Fasting Insulin	T	C	0.75489	0.013816	0.027913	0.62061	Imputed	0.994	T	C	0.33231	-0.054632	0.040791	0.18046	Imputed	0.936	T	C	0.36826	0.063928	0.05566	0.25074	Imputed	0.984	T	C	0.3818	-0.0098532	0.046337	0.8316	Imputed	0.967	NA	NA	NA	NA	NA	NA	t	c	-0.116	0.9073
1	FCP	rs4691380	4	157939574	PDGFC	Manning et al. 2012	Fasting Insulin	T	C	0.75447	0.007277	0.0093642	0.4371	Imputed	0.994	T	C	0.33279	0.0041088	0.006949	0.55434	Imputed	0.936	T	C	0.36826	-0.0029292	0.0088385	0.74034	Imputed	0.984	T	C	0.3818	-0.0032951	0.0073819	0.65532	Imputed	0.967	NA	NA	NA	NA	NA	NA	t	c	0.337	0.7364
2	FCP	rs4691380	4	157939574	PDGFC	Manning et al. 2012	Fasting Insulin	T	C	0.75447	0.0040741	0.0083833	0.62698	Imputed	0.994	T	C	0.33279	0.0011312	0.0058437	0.84651	Imputed	0.936	T	C	0.36826	0.00036747	0.007092	0.95868	Imputed	0.984	T	C	0.3818	-0.0012428	0.0065262	0.84897	Imputed	0.967	NA	NA	NA	NA	NA	NA	t	c	0.27	0.7872
1	FPG	rs4691380	4	157939574	PDGFC	Manning et al. 2012	Fasting Insulin	T	C	0.75489	-0.00033528	0.0013312	0.80115	Imputed	0.994	T	C	0.33231	0.0011541	0.0014112	0.41348	Imputed	0.936	T	C	0.36826	0.0023847	0.0020192	0.23758	Imputed	0.984	T	C	0.3818	-0.00045193	0.0014556	0.7562	Imputed	0.967	NA	NA	NA	NA	NA	NA	t	c	0.677	0.4985
2	FPG	rs4691380	4	157939574	PDGFC	Manning et al. 2012	Fasting Insulin	T	C	0.75489	-0.00044121	0.0012991	0.73414	Imputed	0.994	T	C	0.33231	0.00075954	0.0013318	0.56846	Imputed	0.936	T	C	0.36826	0.002841	0.0018513	0.12487	Imputed	0.984	T	C	0.3818	-0.00031949	0.0013879	0.81794	Imputed	0.967	NA	NA	NA	NA	NA	NA	t	c	0.689	0.4906
1	1HPG	rs4457053	5	76460705	ZBED3	Voight et al. 2010	Type 2 Diabetes	NA	NA	NA	NA	NA	NA	N/A	N/A	NA	NA	NA	NA	NA	NA	N/A	N/A	NA	NA	NA	NA	NA	NA	N/A	N/A	NA	NA	NA	NA	NA	NA	N/A	N/A	NA	NA	NA	NA	NA	NA	NA	NA	NA	NA
2	1HPG	rs4457053	5	76460705	ZBED3	Voight et al. 2010	Type 2 Diabetes	NA	NA	NA	NA	NA	NA	N/A	N/A	NA	NA	NA	NA	NA	NA	N/A	N/A	NA	NA	NA	NA	NA	NA	N/A	N/A	NA	NA	NA	NA	NA	NA	N/A	N/A	NA	NA	NA	NA	NA	NA	NA	NA	NA	NA
1	2HPG	rs4457053	5	76460705	ZBED3	Voight et al. 2010	Type 2 Diabetes	NA	NA	NA	NA	NA	NA	N/A	N/A	NA	NA	NA	NA	NA	NA	N/A	N/A	NA	NA	NA	NA	NA	NA	N/A	N/A	NA	NA	NA	NA	NA	NA	N/A	N/A	NA	NA	NA	NA	NA	NA	NA	NA	NA	NA
2	2HPG	rs4457053	5	76460705	ZBED3	Voight et al. 2010	Type 2 Diabetes	NA	NA	NA	NA	NA	NA	N/A	N/A	NA	NA	NA	NA	NA	NA	N/A	N/A	NA	NA	NA	NA	NA	NA	N/A	N/A	NA	NA	NA	NA	NA	NA	N/A	N/A	NA	NA	NA	NA	NA	NA	NA	NA	NA	NA
1	FCP	rs4457053	5	76460705	ZBED3	Voight et al. 2010	Type 2 Diabetes	NA	NA	NA	NA	NA	NA	N/A	N/A	NA	NA	NA	NA	NA	NA	N/A	N/A	NA	NA	NA	NA	NA	NA	N/A	N/A	NA	NA	NA	NA	NA	NA	N/A	N/A	NA	NA	NA	NA	NA	NA	NA	NA	NA	NA
2	FCP	rs4457053	5	76460705	ZBED3	Voight et al. 2010	Type 2 Diabetes	NA	NA	NA	NA	NA	NA	N/A	N/A	NA	NA	NA	NA	NA	NA	N/A	N/A	NA	NA	NA	NA	NA	NA	N/A	N/A	NA	NA	NA	NA	NA	NA	N/A	N/A	NA	NA	NA	NA	NA	NA	NA	NA	NA	NA
1	FPG	rs4457053	5	76460705	ZBED3	Voight et al. 2010	Type 2 Diabetes	NA	NA	NA	NA	NA	NA	N/A	N/A	NA	NA	NA	NA	NA	NA	N/A	N/A	NA	NA	NA	NA	NA	NA	N/A	N/A	NA	NA	NA	NA	NA	NA	N/A	N/A	NA	NA	NA	NA	NA	NA	NA	NA	NA	NA
2	FPG	rs4457053	5	76460705	ZBED3	Voight et al. 2010	Type 2 Diabetes	NA	NA	NA	NA	NA	NA	N/A	N/A	NA	NA	NA	NA	NA	NA	N/A	N/A	NA	NA	NA	NA	NA	NA	N/A	N/A	NA	NA	NA	NA	NA	NA	N/A	N/A	NA	NA	NA	NA	NA	NA	NA	NA	NA	NA
1	1HPG	rs13179048	5	95568482	PCSK1	Manning et al. 2012	Fasting Glucose	NA	NA	NA	NA	NA	NA	N/A	N/A	C	A	0.69649	0.0078751	0.053692	0.88339	Imputed	0.992	C	A	0.78178	0.057959	0.083538	0.4878	Imputed	0.998	C	A	0.64253	-0.014219	0.05248	0.78643	Imputed	0.996	NA	NA	NA	NA	NA	NA	a	c	-0.275	0.7832
2	1HPG	rs13179048	5	95568482	PCSK1	Manning et al. 2012	Fasting Glucose	NA	NA	NA	NA	NA	NA	N/A	N/A	C	A	0.69649	0.00079108	0.052244	0.98792	Imputed	0.992	C	A	0.78178	0.073255	0.080513	0.3629	Imputed	0.998	C	A	0.64253	-0.0087442	0.051692	0.86567	Imputed	0.996	NA	NA	NA	NA	NA	NA	a	c	-0.358	0.7203
1	2HPG	rs13179048	5	95568482	PCSK1	Manning et al. 2012	Fasting Glucose	NA	NA	NA	NA	NA	NA	N/A	N/A	C	A	0.69649	-0.0096457	0.042933	0.82223	Imputed	0.992	C	A	0.78178	0.025221	0.064586	0.69616	Imputed	0.998	C	A	0.64253	0.0071112	0.04578	0.87656	Imputed	0.996	NA	NA	NA	NA	NA	NA	a	c	-0.141	0.8877
2	2HPG	rs13179048	5	95568482	PCSK1	Manning et al. 2012	Fasting Glucose	NA	NA	NA	NA	NA	NA	N/A	N/A	C	A	0.69649	-0.014294	0.041789	0.73231	Imputed	0.992	C	A	0.78178	0.029549	0.062688	0.63738	Imputed	0.998	C	A	0.64253	0.005249	0.045259	0.90767	Imputed	0.996	NA	NA	NA	NA	NA	NA	a	c	-0.083	0.9339
1	FCP	rs13179048	5	95568482	PCSK1	Manning et al. 2012	Fasting Glucose	NA	NA	NA	NA	NA	NA	N/A	N/A	C	A	0.69575	0.0029391	0.0071451	0.68082	Imputed	0.992	C	A	0.78178	-0.0043275	0.0099544	0.66376	Imputed	0.998	C	A	0.64253	-0.0057718	0.0072131	0.4236	Imputed	0.996	NA	NA	NA	NA	NA	NA	a	c	0.426	0.6698
2	FCP	rs13179048	5	95568482	PCSK1	Manning et al. 2012	Fasting Glucose	NA	NA	NA	NA	NA	NA	N/A	N/A	C	A	0.69575	0.00092722	0.0060071	0.87733	Imputed	0.992	C	A	0.78178	0.0016488	0.0079769	0.83624	Imputed	0.998	C	A	0.64253	-0.00048299	0.0063638	0.9395	Imputed	0.996	NA	NA	NA	NA	NA	NA	a	c	-0.155	0.8766
1	FPG	rs13179048	5	95568482	PCSK1	Manning et al. 2012	Fasting Glucose	NA	NA	NA	NA	NA	NA	N/A	N/A	C	A	0.69649	0.0055961	0.0014463	0.00010916	Imputed	0.992	C	A	0.78178	0.0061811	0.0022754	0.0065983	Imputed	0.998	C	A	0.64253	0.0051365	0.0014231	0.00030682	Imputed	0.996	NA	NA	NA	NA	NA	NA	a	c	-5.943	2.799e-09
2	FPG	rs13179048	5	95568482	PCSK1	Manning et al. 2012	Fasting Glucose	NA	NA	NA	NA	NA	NA	N/A	N/A	C	A	0.69649	0.0053672	0.0013674	8.6695e-05	Imputed	0.992	C	A	0.78178	0.0070052	0.0020843	0.00077661	Imputed	0.998	C	A	0.64253	0.0055629	0.0013566	4.1222e-05	Imputed	0.996	NA	NA	NA	NA	NA	NA	a	c	-6.587	4.49e-11
1	1HPG	rs7754840	6	20769229	CDKAL1	Zeggini et al. 2007	Type 2 Diabetes	G	C	0.37045	-0.01777	0.029135	0.54191	Genotyped	N/A	G	C	0.6944	-0.054101	0.051377	0.29234	Genotyped	N/A	G	C	0.6836	-0.060063	0.074935	0.42282	Genotyped	N/A	G	C	0.6736	-0.1771	0.053947	0.0010277	Genotyped	N/A	NA	NA	NA	NA	NA	NA	c	g	2.92	0.003499
2	1HPG	rs7754840	6	20769229	CDKAL1	Zeggini et al. 2007	Type 2 Diabetes	G	C	0.37045	-0.018459	0.028936	0.52352	Genotyped	N/A	G	C	0.6944	-0.038998	0.049987	0.4353	Genotyped	N/A	G	C	0.6836	-0.054318	0.072212	0.45193	Genotyped	N/A	G	C	0.6736	-0.19687	0.053148	0.00021203	Genotyped	N/A	NA	NA	NA	NA	NA	NA	c	g	2.978	0.002897
1	2HPG	rs7754840	6	20769229	CDKAL1	Zeggini et al. 2007	Type 2 Diabetes	G	C	0.37045	-0.050266	0.025416	0.047958	Genotyped	N/A	G	C	0.6944	-0.024335	0.041173	0.5545	Genotyped	N/A	G	C	0.6836	0.017662	0.057939	0.76049	Genotyped	N/A	G	C	0.6736	-0.06905	0.047102	0.14266	Genotyped	N/A	NA	NA	NA	NA	NA	NA	c	g	1.926	0.05409
2	2HPG	rs7754840	6	20769229	CDKAL1	Zeggini et al. 2007	Type 2 Diabetes	G	C	0.37045	-0.055812	0.02489	0.02494	Genotyped	N/A	G	C	0.6944	-0.012306	0.040075	0.75879	Genotyped	N/A	G	C	0.6836	0.023585	0.056233	0.67492	Genotyped	N/A	G	C	0.6736	-0.081851	0.046566	0.078794	Genotyped	N/A	NA	NA	NA	NA	NA	NA	c	g	2	0.04551
1	FCP	rs7754840	6	20769229	CDKAL1	Zeggini et al. 2007	Type 2 Diabetes	G	C	0.37066	-0.0040237	0.0083601	0.6303	Genotyped	N/A	G	C	0.69402	-0.0051219	0.0068281	0.45319	Genotyped	N/A	G	C	0.6836	-0.011371	0.0089292	0.20286	Genotyped	N/A	G	C	0.6736	0.0069716	0.0074206	0.34748	Genotyped	N/A	NA	NA	NA	NA	NA	NA	c	g	0.715	0.4746
2	FCP	rs7754840	6	20769229	CDKAL1	Zeggini et al. 2007	Type 2 Diabetes	G	C	0.37066	-0.0012843	0.0074881	0.86382	Genotyped	N/A	G	C	0.69402	-0.0013877	0.005735	0.8088	Genotyped	N/A	G	C	0.6836	-0.010832	0.0071552	0.13005	Genotyped	N/A	G	C	0.6736	-0.0010772	0.0065463	0.8693	Genotyped	N/A	NA	NA	NA	NA	NA	NA	c	g	0.954	0.34
1	FPG	rs7754840	6	20769229	CDKAL1	Zeggini et al. 2007	Type 2 Diabetes	G	C	0.37045	0.0023331	0.0011875	0.049449	Genotyped	N/A	G	C	0.6944	-0.00099998	0.0013869	0.4709	Genotyped	N/A	G	C	0.6836	-0.0044153	0.0020413	0.030541	Genotyped	N/A	G	C	0.6736	-0.0021579	0.0014642	0.14054	Genotyped	N/A	NA	NA	NA	NA	NA	NA	c	g	1.121	0.2624
2	FPG	rs7754840	6	20769229	CDKAL1	Zeggini et al. 2007	Type 2 Diabetes	G	C	0.37045	0.0025533	0.001159	0.027592	Genotyped	N/A	G	C	0.6944	-0.00053463	0.0013112	0.68347	Genotyped	N/A	G	C	0.6836	-0.004273	0.0018695	0.022275	Genotyped	N/A	G	C	0.6736	-0.0030882	0.0013958	0.026935	Genotyped	N/A	NA	NA	NA	NA	NA	NA	c	g	1.263	0.2067
1	1HPG	rs9368222	6	20794975	CDKAL1	Saxena et al. 2012	Type 2 Diabetes	C	A	0.81535	-0.029194	0.034808	0.40162	Genotyped	N/A	C	A	0.74495	-0.078238	0.0558	0.16088	Imputed	0.99	C	A	0.74541	-0.14318	0.079778	0.072699	Genotyped	N/A	C	A	0.67912	-0.20261	0.054166	0.00018366	Genotyped	N/A	NA	NA	NA	NA	NA	NA	a	c	3.889	0.0001008
2	1HPG	rs9368222	6	20794975	CDKAL1	Saxena et al. 2012	Type 2 Diabetes	C	A	0.81535	-0.027874	0.03457	0.42007	Genotyped	N/A	C	A	0.74495	-0.047393	0.054282	0.38261	Imputed	0.99	C	A	0.74541	-0.14122	0.076879	0.066225	Genotyped	N/A	C	A	0.67912	-0.21325	0.053363	6.4351e-05	Genotyped	N/A	NA	NA	NA	NA	NA	NA	a	c	3.729	0.0001924
1	2HPG	rs9368222	6	20794975	CDKAL1	Saxena et al. 2012	Type 2 Diabetes	C	A	0.81535	-0.060873	0.030374	0.045057	Genotyped	N/A	C	A	0.74495	-0.050512	0.0447	0.25846	Imputed	0.99	C	A	0.74541	-0.015287	0.061683	0.80427	Genotyped	N/A	C	A	0.67912	-0.11126	0.047293	0.018645	Genotyped	N/A	NA	NA	NA	NA	NA	NA	a	c	2.932	0.003365
2	2HPG	rs9368222	6	20794975	CDKAL1	Saxena et al. 2012	Type 2 Diabetes	C	A	0.81535	-0.055997	0.029743	0.059742	Genotyped	N/A	C	A	0.74495	-0.026065	0.043498	0.54903	Imputed	0.99	C	A	0.74541	-0.011991	0.059868	0.84126	Genotyped	N/A	C	A	0.67912	-0.11908	0.046755	0.010866	Genotyped	N/A	NA	NA	NA	NA	NA	NA	a	c	2.658	0.00787
1	FCP	rs9368222	6	20794975	CDKAL1	Saxena et al. 2012	Type 2 Diabetes	C	A	0.81455	0.017089	0.0099705	0.086546	Genotyped	N/A	C	A	0.74475	-0.0096831	0.0074265	0.19229	Imputed	0.99	C	A	0.74541	-0.013063	0.0095063	0.1694	Genotyped	N/A	C	A	0.67912	0.0058928	0.0074507	0.429	Genotyped	N/A	NA	NA	NA	NA	NA	NA	a	c	0.065	0.9482
2	FCP	rs9368222	6	20794975	CDKAL1	Saxena et al. 2012	Type 2 Diabetes	C	A	0.81455	0.014073	0.0089265	0.1149	Genotyped	N/A	C	A	0.74475	-0.0012338	0.0062347	0.84313	Imputed	0.99	C	A	0.74541	-0.013512	0.0076177	0.076106	Genotyped	N/A	C	A	0.67912	0.0018552	0.0065728	0.77775	Genotyped	N/A	NA	NA	NA	NA	NA	NA	a	c	-0.047	0.9624
1	FPG	rs9368222	6	20794975	CDKAL1	Saxena et al. 2012	Type 2 Diabetes	C	A	0.81535	0.0030459	0.0014188	0.031816	Genotyped	N/A	C	A	0.74495	-0.0022852	0.0015081	0.1297	Imputed	0.99	C	A	0.74541	-0.0039592	0.0021732	0.068486	Genotyped	N/A	C	A	0.67912	-0.0027591	0.0014701	0.060537	Genotyped	N/A	NA	NA	NA	NA	NA	NA	a	c	1.533	0.1252
2	FPG	rs9368222	6	20794975	CDKAL1	Saxena et al. 2012	Type 2 Diabetes	C	A	0.81535	0.0028312	0.0013848	0.040908	Genotyped	N/A	C	A	0.74495	-0.0012389	0.0014252	0.38468	Imputed	0.99	C	A	0.74541	-0.0039656	0.0019904	0.046326	Genotyped	N/A	C	A	0.67912	-0.0032057	0.0014015	0.022176	Genotyped	N/A	NA	NA	NA	NA	NA	NA	a	c	1.51	0.1311
1	1HPG	rs1800562	6	26201120	HFE	Soranzo et al. 2010	Hemoglobin A1C	NA	NA	NA	NA	NA	NA	Genotyped	N/A	G	A	0.923189	0.0063133	0.090433	0.94434	Genotyped	N/A	G	A	0.982864	-0.43823	0.27107	0.10595	Genotyped	N/A	NA	NA	NA	NA	NA	NA	N/A	N/A	NA	NA	NA	NA	NA	NA	a	g	0.934	0.3505
2	1HPG	rs1800562	6	26201120	HFE	Soranzo et al. 2010	Hemoglobin A1C	NA	NA	NA	NA	NA	NA	Genotyped	N/A	G	A	0.923189	-0.011159	0.087987	0.89907	Genotyped	N/A	G	A	0.982864	-0.42789	0.26122	0.10141	Genotyped	N/A	NA	NA	NA	NA	NA	NA	N/A	N/A	NA	NA	NA	NA	NA	NA	a	g	1.102	0.2704
1	2HPG	rs1800562	6	26201120	HFE	Soranzo et al. 2010	Hemoglobin A1C	NA	NA	NA	NA	NA	NA	Genotyped	N/A	G	A	0.923189	0.070236	0.072473	0.33248	Genotyped	N/A	G	A	0.982864	-0.38846	0.20959	0.063816	Genotyped	N/A	NA	NA	NA	NA	NA	NA	N/A	N/A	NA	NA	NA	NA	NA	NA	a	g	0.367	0.7137
2	2HPG	rs1800562	6	26201120	HFE	Soranzo et al. 2010	Hemoglobin A1C	NA	NA	NA	NA	NA	NA	Genotyped	N/A	G	A	0.923189	0.05359	0.07054	0.44743	Genotyped	N/A	G	A	0.982864	-0.3953	0.20342	0.051981	Genotyped	N/A	NA	NA	NA	NA	NA	NA	N/A	N/A	NA	NA	NA	NA	NA	NA	a	g	0.588	0.5569
1	FCP	rs1800562	6	26201120	HFE	Soranzo et al. 2010	Hemoglobin A1C	NA	NA	NA	NA	NA	NA	Genotyped	N/A	G	A	0.923275	-0.022925	0.012029	0.056685	Genotyped	N/A	G	A	0.982864	-0.041209	0.0323	0.20202	Genotyped	N/A	NA	NA	NA	NA	NA	NA	N/A	N/A	NA	NA	NA	NA	NA	NA	a	g	2.288	0.02214
2	FCP	rs1800562	6	26201120	HFE	Soranzo et al. 2010	Hemoglobin A1C	NA	NA	NA	NA	NA	NA	Genotyped	N/A	G	A	0.923275	-0.022318	0.010103	0.027178	Genotyped	N/A	G	A	0.982864	-0.034065	0.025883	0.18815	Genotyped	N/A	NA	NA	NA	NA	NA	NA	N/A	N/A	NA	NA	NA	NA	NA	NA	a	g	2.552	0.0107
1	FPG	rs1800562	6	26201120	HFE	Soranzo et al. 2010	Hemoglobin A1C	NA	NA	NA	NA	NA	NA	Genotyped	N/A	G	A	0.923189	-0.0026828	0.0024412	0.27177	Genotyped	N/A	G	A	0.982864	-0.0093985	0.0073842	0.20309	Genotyped	N/A	NA	NA	NA	NA	NA	NA	N/A	N/A	NA	NA	NA	NA	NA	NA	a	g	1.648	0.09936
2	FPG	rs1800562	6	26201120	HFE	Soranzo et al. 2010	Hemoglobin A1C	NA	NA	NA	NA	NA	NA	Genotyped	N/A	G	A	0.923189	-0.0026685	0.002308	0.24759	Genotyped	N/A	G	A	0.982864	-0.0084962	0.0067628	0.209	Genotyped	N/A	NA	NA	NA	NA	NA	NA	N/A	N/A	NA	NA	NA	NA	NA	NA	a	g	1.683	0.09235
1	1HPG	rs9273363	6	32734250	HLA-DQB1	Saxena et al. 2012	Type 2 Diabetes	C	A	0.909019	0.035055	0.049066	0.47495	Imputed	0.961	C	A	0.69226	0.014257	0.05285	0.78734	Imputed	0.982	C	A	0.67677	0.021479	0.076223	0.77811	Imputed	0.95	C	A	0.74024	-0.1321	0.056929	0.020315	Genotyped	N/A	NA	NA	NA	NA	NA	NA	a	c	0.573	0.5664
2	1HPG	rs9273363	6	32734250	HLA-DQB1	Saxena et al. 2012	Type 2 Diabetes	C	A	0.909019	0.043759	0.048754	0.36942	Imputed	0.961	C	A	0.69226	-0.0097222	0.05144	0.85009	Imputed	0.982	C	A	0.67677	0.030269	0.073542	0.68064	Imputed	0.95	C	A	0.74024	-0.14394	0.056085	0.010276	Genotyped	N/A	NA	NA	NA	NA	NA	NA	a	c	0.809	0.4186
1	2HPG	rs9273363	6	32734250	HLA-DQB1	Saxena et al. 2012	Type 2 Diabetes	C	A	0.909019	0.014347	0.042864	0.73784	Imputed	0.961	C	A	0.69226	-0.005571	0.042464	0.89562	Imputed	0.982	C	A	0.67677	-0.050438	0.059096	0.39338	Imputed	0.95	C	A	0.74024	-0.040023	0.049706	0.4207	Genotyped	N/A	NA	NA	NA	NA	NA	NA	a	c	0.689	0.4907
2	2HPG	rs9273363	6	32734250	HLA-DQB1	Saxena et al. 2012	Type 2 Diabetes	C	A	0.909019	0.022292	0.041942	0.59507	Imputed	0.961	C	A	0.69226	-0.027568	0.041321	0.50466	Imputed	0.982	C	A	0.67677	-0.05049	0.057383	0.37892	Imputed	0.95	C	A	0.74024	-0.052335	0.04914	0.28687	Genotyped	N/A	NA	NA	NA	NA	NA	NA	a	c	1.035	0.3007
1	FCP	rs9273363	6	32734250	HLA-DQB1	Saxena et al. 2012	Type 2 Diabetes	C	A	0.908647	0.006024	0.014096	0.66913	Imputed	0.961	C	A	0.69223	0.0065947	0.0070355	0.34857	Imputed	0.982	C	A	0.67677	-0.011375	0.0090773	0.21015	Imputed	0.95	C	A	0.74024	-0.013524	0.0078308	0.084165	Genotyped	N/A	NA	NA	NA	NA	NA	NA	a	c	0.7	0.4839
2	FCP	rs9273363	6	32734250	HLA-DQB1	Saxena et al. 2012	Type 2 Diabetes	C	A	0.908647	-0.0020936	0.012599	0.86802	Imputed	0.961	C	A	0.69223	0.0017286	0.005907	0.7698	Imputed	0.982	C	A	0.67677	-0.0072375	0.0072923	0.32096	Imputed	0.95	C	A	0.74024	-0.015097	0.0069081	0.028864	Genotyped	N/A	NA	NA	NA	NA	NA	NA	a	c	1.474	0.1406
1	FPG	rs9273363	6	32734250	HLA-DQB1	Saxena et al. 2012	Type 2 Diabetes	C	A	0.909019	-0.0015421	0.0020086	0.44261	Imputed	0.961	C	A	0.69226	0.00039353	0.0014252	0.78245	Imputed	0.982	C	A	0.67677	0.0023379	0.0020764	0.26018	Imputed	0.95	C	A	0.74024	-0.0017488	0.0015451	0.25771	Genotyped	N/A	NA	NA	NA	NA	NA	NA	a	c	0.325	0.7454
2	FPG	rs9273363	6	32734250	HLA-DQB1	Saxena et al. 2012	Type 2 Diabetes	C	A	0.909019	-0.0020855	0.0019608	0.2875	Imputed	0.961	C	A	0.69226	-0.00026928	0.0013477	0.84163	Imputed	0.982	C	A	0.67677	0.0028948	0.0019019	0.12801	Imputed	0.95	C	A	0.74024	-0.002225	0.001473	0.13091	Genotyped	N/A	NA	NA	NA	NA	NA	NA	a	c	0.76	0.4475
1	1HPG	rs4646949	6	34953427	UHRF1BP1	Manning et al. 2012	Fasting Insulin	NA	NA	NA	NA	NA	NA	N/A	N/A	NA	NA	NA	NA	NA	NA	N/A	N/A	NA	NA	NA	NA	NA	NA	N/A	N/A	NA	NA	NA	NA	NA	NA	N/A	N/A	NA	NA	NA	NA	NA	NA	NA	NA	NA	NA
2	1HPG	rs4646949	6	34953427	UHRF1BP1	Manning et al. 2012	Fasting Insulin	NA	NA	NA	NA	NA	NA	N/A	N/A	NA	NA	NA	NA	NA	NA	N/A	N/A	NA	NA	NA	NA	NA	NA	N/A	N/A	NA	NA	NA	NA	NA	NA	N/A	N/A	NA	NA	NA	NA	NA	NA	NA	NA	NA	NA
1	2HPG	rs4646949	6	34953427	UHRF1BP1	Manning et al. 2012	Fasting Insulin	NA	NA	NA	NA	NA	NA	N/A	N/A	NA	NA	NA	NA	NA	NA	N/A	N/A	NA	NA	NA	NA	NA	NA	N/A	N/A	NA	NA	NA	NA	NA	NA	N/A	N/A	NA	NA	NA	NA	NA	NA	NA	NA	NA	NA
2	2HPG	rs4646949	6	34953427	UHRF1BP1	Manning et al. 2012	Fasting Insulin	NA	NA	NA	NA	NA	NA	N/A	N/A	NA	NA	NA	NA	NA	NA	N/A	N/A	NA	NA	NA	NA	NA	NA	N/A	N/A	NA	NA	NA	NA	NA	NA	N/A	N/A	NA	NA	NA	NA	NA	NA	NA	NA	NA	NA
1	FCP	rs4646949	6	34953427	UHRF1BP1	Manning et al. 2012	Fasting Insulin	NA	NA	NA	NA	NA	NA	N/A	N/A	NA	NA	NA	NA	NA	NA	N/A	N/A	NA	NA	NA	NA	NA	NA	N/A	N/A	NA	NA	NA	NA	NA	NA	N/A	N/A	NA	NA	NA	NA	NA	NA	NA	NA	NA	NA
2	FCP	rs4646949	6	34953427	UHRF1BP1	Manning et al. 2012	Fasting Insulin	NA	NA	NA	NA	NA	NA	N/A	N/A	NA	NA	NA	NA	NA	NA	N/A	N/A	NA	NA	NA	NA	NA	NA	N/A	N/A	NA	NA	NA	NA	NA	NA	N/A	N/A	NA	NA	NA	NA	NA	NA	NA	NA	NA	NA
1	FPG	rs4646949	6	34953427	UHRF1BP1	Manning et al. 2012	Fasting Insulin	NA	NA	NA	NA	NA	NA	N/A	N/A	NA	NA	NA	NA	NA	NA	N/A	N/A	NA	NA	NA	NA	NA	NA	N/A	N/A	NA	NA	NA	NA	NA	NA	N/A	N/A	NA	NA	NA	NA	NA	NA	NA	NA	NA	NA
2	FPG	rs4646949	6	34953427	UHRF1BP1	Manning et al. 2012	Fasting Insulin	NA	NA	NA	NA	NA	NA	N/A	N/A	NA	NA	NA	NA	NA	NA	N/A	N/A	NA	NA	NA	NA	NA	NA	N/A	N/A	NA	NA	NA	NA	NA	NA	N/A	N/A	NA	NA	NA	NA	NA	NA	NA	NA	NA	NA
1	1HPG	rs9470794	6	38214822	ZFAND3	Cho et al. 2012	Type 2 Diabetes	T	C	0.80558	-0.0025907	0.034252	0.93971	Genotyped	N/A	T	C	0.89466	0.0098594	0.078366	0.89988	Genotyped	N/A	T	C	0.927173	0.045811	0.13221	0.72897	Genotyped	N/A	T	C	0.72118	0.024851	0.05725	0.66424	Imputed	0.992	NA	NA	NA	NA	NA	NA	t	c	0.405	0.6855
2	1HPG	rs9470794	6	38214822	ZFAND3	Cho et al. 2012	Type 2 Diabetes	T	C	0.80558	-0.00066692	0.034017	0.98436	Genotyped	N/A	T	C	0.89466	-0.037125	0.076247	0.62632	Genotyped	N/A	T	C	0.927173	0.026874	0.12741	0.83294	Genotyped	N/A	T	C	0.72118	0.032124	0.056403	0.56899	Imputed	0.992	NA	NA	NA	NA	NA	NA	t	c	0.104	0.9171
1	2HPG	rs9470794	6	38214822	ZFAND3	Cho et al. 2012	Type 2 Diabetes	T	C	0.80558	-0.0017948	0.029889	0.95212	Genotyped	N/A	T	C	0.89466	0.072303	0.062803	0.24962	Genotyped	N/A	T	C	0.927173	0.083237	0.10222	0.4155	Genotyped	N/A	T	C	0.72118	0.0079617	0.050014	0.87352	Imputed	0.992	NA	NA	NA	NA	NA	NA	t	c	1.041	0.2979
2	2HPG	rs9470794	6	38214822	ZFAND3	Cho et al. 2012	Type 2 Diabetes	T	C	0.80558	-0.0048521	0.029268	0.86833	Genotyped	N/A	T	C	0.89466	0.038861	0.061127	0.52495	Genotyped	N/A	T	C	0.927173	0.062165	0.099215	0.53094	Genotyped	N/A	T	C	0.72118	0.012416	0.049448	0.80174	Imputed	0.992	NA	NA	NA	NA	NA	NA	t	c	0.67	0.5032
1	FCP	rs9470794	6	38214822	ZFAND3	Cho et al. 2012	Type 2 Diabetes	T	C	0.80469	-0.00026005	0.0098113	0.97885	Genotyped	N/A	T	C	0.89464	0.032244	0.010419	0.0019694	Genotyped	N/A	T	C	0.927173	0.023636	0.015754	0.13354	Genotyped	N/A	T	C	0.72118	-0.0059059	0.0078774	0.45342	Imputed	0.992	NA	NA	NA	NA	NA	NA	t	c	1.962	0.04971
2	FCP	rs9470794	6	38214822	ZFAND3	Cho et al. 2012	Type 2 Diabetes	T	C	0.80469	-0.00072432	0.008784	0.93428	Genotyped	N/A	T	C	0.89464	0.016039	0.0087506	0.066822	Genotyped	N/A	T	C	0.927173	0.022003	0.012624	0.081352	Genotyped	N/A	T	C	0.72118	-0.0024851	0.0069491	0.72063	Imputed	0.992	NA	NA	NA	NA	NA	NA	t	c	1.541	0.1232
1	FPG	rs9470794	6	38214822	ZFAND3	Cho et al. 2012	Type 2 Diabetes	T	C	0.80558	0.00013969	0.0013962	0.92031	Genotyped	N/A	T	C	0.89466	0.003483	0.0021155	0.099669	Genotyped	N/A	T	C	0.927173	0.0053595	0.0036016	0.13672	Genotyped	N/A	T	C	0.72118	-0.0010421	0.0015536	0.50236	Imputed	0.992	NA	NA	NA	NA	NA	NA	t	c	1.256	0.2091
2	FPG	rs9470794	6	38214822	ZFAND3	Cho et al. 2012	Type 2 Diabetes	T	C	0.80558	0.00019491	0.0013627	0.88626	Genotyped	N/A	T	C	0.89466	0.0015419	0.002	0.44075	Genotyped	N/A	T	C	0.927173	0.0049302	0.0032985	0.135	Genotyped	N/A	T	C	0.72118	-0.00072532	0.001481	0.62431	Imputed	0.992	NA	NA	NA	NA	NA	NA	t	c	0.887	0.3749
1	1HPG	rs1535500	6	39392028	KCNK16	Cho et al. 2012	Type 2 Diabetes	T	G	0.86903	-0.081197	0.040627	0.04565	Imputed	0.987	T	G	0.494	0.032475	0.047149	0.49097	Imputed	0.995	T	G	0.44868	0.040414	0.069632	0.56165	Imputed	0.987	T	G	0.62091	-0.11825	0.052924	0.025467	Imputed	0.986	NA	NA	NA	NA	NA	NA	t	g	-1.504	0.1327
2	1HPG	rs1535500	6	39392028	KCNK16	Cho et al. 2012	Type 2 Diabetes	T	G	0.86903	-0.076183	0.040352	0.05903	Imputed	0.987	T	G	0.494	0.040345	0.045869	0.37909	Imputed	0.995	T	G	0.44868	0.012194	0.067104	0.8558	Imputed	0.987	T	G	0.62091	-0.12847	0.052154	0.013769	Imputed	0.986	NA	NA	NA	NA	NA	NA	t	g	-1.632	0.1026
1	2HPG	rs1535500	6	39392028	KCNK16	Cho et al. 2012	Type 2 Diabetes	T	G	0.86903	0.07239	0.035511	0.041497	Imputed	0.987	T	G	0.494	0.052765	0.037789	0.16262	Imputed	0.995	T	G	0.44868	0.09237	0.053832	0.086185	Imputed	0.987	T	G	0.62091	-0.030322	0.046239	0.51197	Imputed	0.986	NA	NA	NA	NA	NA	NA	t	g	2.177	0.02949
2	2HPG	rs1535500	6	39392028	KCNK16	Cho et al. 2012	Type 2 Diabetes	T	G	0.86903	0.074057	0.034775	0.033207	Imputed	0.987	T	G	0.494	0.056865	0.036778	0.12207	Imputed	0.995	T	G	0.44868	0.071379	0.052242	0.17184	Imputed	0.987	T	G	0.62091	-0.038262	0.045717	0.40263	Imputed	0.986	NA	NA	NA	NA	NA	NA	t	g	2.061	0.03926
1	FCP	rs1535500	6	39392028	KCNK16	Cho et al. 2012	Type 2 Diabetes	T	G	0.86967	0.0017255	0.011699	0.88275	Imputed	0.987	T	G	0.49434	-0.010194	0.0062806	0.10458	Imputed	0.995	T	G	0.44868	0.013793	0.0083007	0.09659	Imputed	0.987	T	G	0.62091	0.0016063	0.0072832	0.82544	Imputed	0.986	NA	NA	NA	NA	NA	NA	t	g	0	0.9997
2	FCP	rs1535500	6	39392028	KCNK16	Cho et al. 2012	Type 2 Diabetes	T	G	0.86967	-0.0016311	0.010478	0.87629	Imputed	0.987	T	G	0.49434	-0.0066153	0.0052751	0.20982	Imputed	0.995	T	G	0.44868	0.0076216	0.0066534	0.252	Imputed	0.987	T	G	0.62091	-0.001507	0.0064275	0.81463	Imputed	0.986	NA	NA	NA	NA	NA	NA	t	g	-0.401	0.6884
1	FPG	rs1535500	6	39392028	KCNK16	Cho et al. 2012	Type 2 Diabetes	T	G	0.86903	-0.00027178	0.0016582	0.86981	Imputed	0.987	T	G	0.494	-0.00014573	0.0012731	0.90887	Imputed	0.995	T	G	0.44868	0.00060457	0.0018992	0.75023	Imputed	0.987	T	G	0.62091	-0.0026957	0.0014368	0.060631	Imputed	0.986	NA	NA	NA	NA	NA	NA	t	g	-0.974	0.3299
2	FPG	rs1535500	6	39392028	KCNK16	Cho et al. 2012	Type 2 Diabetes	T	G	0.86903	-0.00047709	0.0016185	0.76817	Imputed	0.987	T	G	0.494	0.00027224	0.0012035	0.82105	Imputed	0.995	T	G	0.44868	-0.00042462	0.0017388	0.80707	Imputed	0.987	T	G	0.62091	-0.003162	0.0013704	0.021035	Imputed	0.986	NA	NA	NA	NA	NA	NA	t	g	-1.313	0.1891
1	1HPG	rs864745	7	28147081	JAZF1	Saxena et al. 2012	Type 2 Diabetes	T	C	0.76502	-0.067508	0.033068	0.041205	Imputed	0.994	T	C	0.51301	-0.026767	0.049271	0.58695	Imputed	0.964	T	C	0.63882	0.067677	0.069907	0.33299	Imputed	0.995	T	C	0.75576	0.03407	0.058469	0.56009	Imputed	0.982	NA	NA	NA	NA	NA	NA	t	c	-0.591	0.5547
2	1HPG	rs864745	7	28147081	JAZF1	Saxena et al. 2012	Type 2 Diabetes	T	C	0.76502	-0.066923	0.03285	0.041624	Imputed	0.994	T	C	0.51301	-0.020448	0.047989	0.67004	Imputed	0.964	T	C	0.63882	0.06099	0.067369	0.3653	Imputed	0.995	T	C	0.75576	0.024343	0.057589	0.67251	Imputed	0.982	NA	NA	NA	NA	NA	NA	t	c	-0.633	0.5267
1	2HPG	rs864745	7	28147081	JAZF1	Saxena et al. 2012	Type 2 Diabetes	T	C	0.76502	0.032616	0.028878	0.25872	Imputed	0.994	T	C	0.51301	0.008386	0.039416	0.83152	Imputed	0.964	T	C	0.63882	0.082016	0.054042	0.12911	Imputed	0.995	T	C	0.75576	0.0386	0.051144	0.45041	Imputed	0.982	NA	NA	NA	NA	NA	NA	t	c	1.714	0.08651
2	2HPG	rs864745	7	28147081	JAZF1	Saxena et al. 2012	Type 2 Diabetes	T	C	0.76502	0.032837	0.028279	0.24556	Imputed	0.994	T	C	0.51301	0.014141	0.038379	0.71254	Imputed	0.964	T	C	0.63882	0.085731	0.052453	0.10216	Imputed	0.995	T	C	0.75576	0.02965	0.050551	0.55752	Imputed	0.982	NA	NA	NA	NA	NA	NA	t	c	1.78	0.07513
1	FCP	rs864745	7	28147081	JAZF1	Saxena et al. 2012	Type 2 Diabetes	T	C	0.76422	0.0028293	0.0095212	0.76635	Imputed	0.994	T	C	0.51232	-0.00028787	0.0065476	0.96493	Imputed	0.964	T	C	0.63882	0.004403	0.0083284	0.59703	Imputed	0.995	T	C	0.75576	0.0071767	0.0080499	0.37265	Imputed	0.982	NA	NA	NA	NA	NA	NA	t	c	0.809	0.4186
2	FCP	rs864745	7	28147081	JAZF1	Saxena et al. 2012	Type 2 Diabetes	T	C	0.76422	0.003111	0.0085169	0.71491	Imputed	0.994	T	C	0.51232	0.0009417	0.0054911	0.86383	Imputed	0.964	T	C	0.63882	-0.0002861	0.0066746	0.96581	Imputed	0.995	T	C	0.75576	0.004596	0.0071003	0.51744	Imputed	0.982	NA	NA	NA	NA	NA	NA	t	c	0.59	0.5551
1	FPG	rs864745	7	28147081	JAZF1	Saxena et al. 2012	Type 2 Diabetes	T	C	0.76502	0.00076669	0.0013473	0.56932	Imputed	0.994	T	C	0.51301	0.00090739	0.0013337	0.4963	Imputed	0.964	T	C	0.63882	0.0022068	0.0019049	0.24666	Imputed	0.995	T	C	0.75576	0.00027441	0.0015908	0.86305	Imputed	0.982	NA	NA	NA	NA	NA	NA	t	c	1.244	0.2136
2	FPG	rs864745	7	28147081	JAZF1	Saxena et al. 2012	Type 2 Diabetes	T	C	0.76502	0.00074103	0.001315	0.57309	Imputed	0.994	T	C	0.51301	0.0010832	0.0012611	0.3904	Imputed	0.964	T	C	0.63882	0.0016359	0.0017449	0.34849	Imputed	0.995	T	C	0.75576	-9.1321e-05	0.0015162	0.95197	Imputed	0.982	NA	NA	NA	NA	NA	NA	t	c	1.125	0.2604
1	1HPG	rs4607517	7	44202193	GCK	Dupuis et al. 2010	Fasting Glucose	G	A	0.918605	0.084147	0.049621	0.089922	Genotyped	N/A	G	A	0.8259	-0.025913	0.065386	0.69187	Genotyped	N/A	G	A	0.80906	-0.21924	0.089716	0.014535	Genotyped	N/A	G	A	0.89686	-0.0045599	0.081594	0.95543	Genotyped	N/A	NA	NA	NA	NA	NA	NA	a	g	0.463	0.6436
2	1HPG	rs4607517	7	44202193	GCK	Dupuis et al. 2010	Fasting Glucose	G	A	0.918605	0.086043	0.049281	0.080818	Genotyped	N/A	G	A	0.8259	-0.033357	0.063617	0.60004	Genotyped	N/A	G	A	0.80906	-0.17723	0.086456	0.04037	Genotyped	N/A	G	A	0.89686	-0.00044031	0.080385	0.99563	Genotyped	N/A	NA	NA	NA	NA	NA	NA	a	g	0.314	0.7534
1	2HPG	rs4607517	7	44202193	GCK	Dupuis et al. 2010	Fasting Glucose	G	A	0.918605	0.0023518	0.0433	0.95668	Genotyped	N/A	G	A	0.8259	0.049238	0.0524	0.34739	Genotyped	N/A	G	A	0.80906	-0.24352	0.069367	0.00044701	Genotyped	N/A	G	A	0.89686	-0.18874	0.071241	0.0080651	Genotyped	N/A	NA	NA	NA	NA	NA	NA	a	g	2.323	0.02017
2	2HPG	rs4607517	7	44202193	GCK	Dupuis et al. 2010	Fasting Glucose	G	A	0.918605	-0.0010137	0.0424	0.98093	Genotyped	N/A	G	A	0.8259	0.046537	0.051002	0.36153	Genotyped	N/A	G	A	0.80906	-0.2134	0.067325	0.0015259	Genotyped	N/A	G	A	0.89686	-0.18347	0.070431	0.0091862	Genotyped	N/A	NA	NA	NA	NA	NA	NA	a	g	2.208	0.02726
1	FCP	rs4607517	7	44202193	GCK	Dupuis et al. 2010	Fasting Glucose	G	A	0.91831	-0.011916	0.014214	0.40184	Genotyped	N/A	G	A	0.82526	0.020283	0.0086867	0.019544	Genotyped	N/A	G	A	0.80906	-0.011289	0.01069	0.29096	Genotyped	N/A	G	A	0.89686	0.0066204	0.011224	0.55528	Genotyped	N/A	NA	NA	NA	NA	NA	NA	a	g	-0.735	0.4623
2	FCP	rs4607517	7	44202193	GCK	Dupuis et al. 2010	Fasting Glucose	G	A	0.91831	-0.011409	0.012726	0.36997	Genotyped	N/A	G	A	0.82526	0.016438	0.0072959	0.02426	Genotyped	N/A	G	A	0.80906	-0.0015594	0.0085666	0.85555	Genotyped	N/A	G	A	0.89686	0.0066145	0.0099011	0.5041	Genotyped	N/A	NA	NA	NA	NA	NA	NA	a	g	-1.077	0.2815
1	FPG	rs4607517	7	44202193	GCK	Dupuis et al. 2010	Fasting Glucose	G	A	0.918605	-0.0025114	0.0020226	0.21436	Genotyped	N/A	G	A	0.8259	-0.00091118	0.001765	0.60569	Genotyped	N/A	G	A	0.80906	-0.0063107	0.0024439	0.0098178	Genotyped	N/A	G	A	0.89686	-0.0030824	0.0022145	0.16395	Genotyped	N/A	NA	NA	NA	NA	NA	NA	a	g	2.723	0.00647
2	FPG	rs4607517	7	44202193	GCK	Dupuis et al. 2010	Fasting Glucose	G	A	0.918605	-0.0024442	0.0019741	0.21567	Genotyped	N/A	G	A	0.8259	-0.0013225	0.0016687	0.42805	Genotyped	N/A	G	A	0.80906	-0.0047341	0.0022383	0.034425	Genotyped	N/A	G	A	0.89686	-0.0029479	0.0021112	0.16262	Genotyped	N/A	NA	NA	NA	NA	NA	NA	a	g	2.676	0.007442
1	1HPG	rs6467136	7	126952194	GCC1-PAX4	Cho et al. 2012	Type 2 Diabetes	G	A	0.65721	0.014145	0.029173	0.62777	Genotyped	N/A	G	A	0.49671	-0.034759	0.047036	0.45992	Genotyped	N/A	G	A	0.44982	0.13366	0.071953	0.063226	Genotyped	N/A	G	A	0.79644	-0.065377	0.062273	0.29379	Imputed	0.996	NA	NA	NA	NA	NA	NA	a	g	-0.085	0.9325
2	1HPG	rs6467136	7	126952194	GCC1-PAX4	Cho et al. 2012	Type 2 Diabetes	G	A	0.65721	0.010908	0.028974	0.70656	Genotyped	N/A	G	A	0.49671	-0.020364	0.045764	0.65633	Genotyped	N/A	G	A	0.44982	0.10798	0.069339	0.11941	Genotyped	N/A	G	A	0.79644	-0.084989	0.06135	0.16596	Imputed	0.996	NA	NA	NA	NA	NA	NA	a	g	0.107	0.9146
1	2HPG	rs6467136	7	126952194	GCC1-PAX4	Cho et al. 2012	Type 2 Diabetes	G	A	0.65721	-0.0070228	0.025457	0.78265	Genotyped	N/A	G	A	0.49671	-0.039157	0.037695	0.29891	Genotyped	N/A	G	A	0.44982	-0.013057	0.055633	0.81444	Genotyped	N/A	G	A	0.79644	-0.053917	0.054409	0.32171	Imputed	0.996	NA	NA	NA	NA	NA	NA	a	g	1.324	0.1856
2	2HPG	rs6467136	7	126952194	GCC1-PAX4	Cho et al. 2012	Type 2 Diabetes	G	A	0.65721	-0.00024544	0.024928	0.99214	Genotyped	N/A	G	A	0.49671	-0.029933	0.036689	0.41459	Genotyped	N/A	G	A	0.44982	-0.026367	0.053996	0.62532	Genotyped	N/A	G	A	0.79644	-0.067966	0.053791	0.2064	Imputed	0.996	NA	NA	NA	NA	NA	NA	a	g	1.318	0.1874
1	FCP	rs6467136	7	126952194	GCC1-PAX4	Cho et al. 2012	Type 2 Diabetes	G	A	0.65775	-0.011028	0.0083656	0.18743	Genotyped	N/A	G	A	0.49633	-0.0036988	0.0062568	0.55441	Genotyped	N/A	G	A	0.44982	0.0061581	0.0085739	0.47262	Genotyped	N/A	G	A	0.79644	0.0022524	0.0085663	0.7926	Imputed	0.996	NA	NA	NA	NA	NA	NA	a	g	0.531	0.5957
2	FCP	rs6467136	7	126952194	GCC1-PAX4	Cho et al. 2012	Type 2 Diabetes	G	A	0.65775	-0.011038	0.0074897	0.14056	Genotyped	N/A	G	A	0.49633	0.002629	0.0052551	0.61688	Genotyped	N/A	G	A	0.44982	-0.0012828	0.0068706	0.85189	Genotyped	N/A	G	A	0.79644	-0.004579	0.0075643	0.54495	Imputed	0.996	NA	NA	NA	NA	NA	NA	a	g	0.838	0.4019
1	FPG	rs6467136	7	126952194	GCC1-PAX4	Cho et al. 2012	Type 2 Diabetes	G	A	0.65721	-0.00015358	0.0011892	0.89724	Genotyped	N/A	G	A	0.49671	-0.0017392	0.0012697	0.17076	Genotyped	N/A	G	A	0.44982	0.0025193	0.0019601	0.19869	Genotyped	N/A	G	A	0.79644	0.00022896	0.0016901	0.89224	Imputed	0.996	NA	NA	NA	NA	NA	NA	a	g	0.203	0.8395
2	FPG	rs6467136	7	126952194	GCC1-PAX4	Cho et al. 2012	Type 2 Diabetes	G	A	0.65721	-0.00030563	0.0011606	0.7923	Genotyped	N/A	G	A	0.49671	-0.0010148	0.0012004	0.3979	Genotyped	N/A	G	A	0.44982	0.0013804	0.0017951	0.4419	Genotyped	N/A	G	A	0.79644	-0.00069643	0.0016117	0.66567	Imputed	0.996	NA	NA	NA	NA	NA	NA	a	g	0.492	0.6231
1	1HPG	rs972283	7	130117394	KLF14	Voight et al. 2010	Type 2 Diabetes	NA	NA	NA	NA	NA	NA	N/A	N/A	G	A	0.54998	-0.070497	0.051141	0.16805	Imputed	0.905	G	A	0.60852	0.060066	0.07458	0.4206	Imputed	0.927	G	A	0.68129	0.037582	0.053674	0.48381	Genotyped	N/A	NA	NA	NA	NA	NA	NA	a	g	0.068	0.9462
2	1HPG	rs972283	7	130117394	KLF14	Voight et al. 2010	Type 2 Diabetes	NA	NA	NA	NA	NA	NA	N/A	N/A	G	A	0.54998	-0.071355	0.049734	0.15136	Imputed	0.905	G	A	0.60852	0.066081	0.071848	0.35771	Imputed	0.927	G	A	0.68129	0.039795	0.052879	0.4517	Genotyped	N/A	NA	NA	NA	NA	NA	NA	a	g	0.016	0.9872
1	2HPG	rs972283	7	130117394	KLF14	Voight et al. 2010	Type 2 Diabetes	NA	NA	NA	NA	NA	NA	N/A	N/A	G	A	0.54998	-0.016173	0.040989	0.69316	Imputed	0.905	G	A	0.60852	0.077818	0.057783	0.17807	Imputed	0.927	G	A	0.68129	0.017857	0.046864	0.70318	Genotyped	N/A	NA	NA	NA	NA	NA	NA	a	g	-0.638	0.5236
2	2HPG	rs972283	7	130117394	KLF14	Voight et al. 2010	Type 2 Diabetes	NA	NA	NA	NA	NA	NA	N/A	N/A	G	A	0.54998	-0.01396	0.039898	0.72642	Imputed	0.905	G	A	0.60852	0.0836	0.056066	0.13594	Imputed	0.927	G	A	0.68129	0.020763	0.04633	0.65405	Genotyped	N/A	NA	NA	NA	NA	NA	NA	a	g	-0.777	0.437
1	FCP	rs972283	7	130117394	KLF14	Voight et al. 2010	Type 2 Diabetes	NA	NA	NA	NA	NA	NA	N/A	N/A	G	A	0.55008	0.0070017	0.0068018	0.3033	Imputed	0.905	G	A	0.60852	-0.0043289	0.0088762	0.62576	Imputed	0.927	G	A	0.68129	-0.0037734	0.0073844	0.60936	Genotyped	N/A	NA	NA	NA	NA	NA	NA	a	g	-0.112	0.9105
2	FCP	rs972283	7	130117394	KLF14	Voight et al. 2010	Type 2 Diabetes	NA	NA	NA	NA	NA	NA	N/A	N/A	G	A	0.55008	0.0048293	0.0057172	0.39828	Imputed	0.905	G	A	0.60852	-0.0036413	0.0070988	0.60799	Imputed	0.927	G	A	0.68129	-0.003575	0.0065143	0.58315	Genotyped	N/A	NA	NA	NA	NA	NA	NA	a	g	0.04	0.968
1	FPG	rs972283	7	130117394	KLF14	Voight et al. 2010	Type 2 Diabetes	NA	NA	NA	NA	NA	NA	N/A	N/A	G	A	0.54998	-0.00052948	0.0013782	0.70085	Imputed	0.905	G	A	0.60852	-0.0015007	0.0020358	0.46102	Imputed	0.927	G	A	0.68129	-0.00088311	0.0014571	0.54446	Genotyped	N/A	NA	NA	NA	NA	NA	NA	a	g	0.967	0.3335
2	FPG	rs972283	7	130117394	KLF14	Voight et al. 2010	Type 2 Diabetes	NA	NA	NA	NA	NA	NA	N/A	N/A	G	A	0.54998	-0.0007276	0.0013043	0.57695	Imputed	0.905	G	A	0.60852	-0.0013352	0.0018639	0.47379	Imputed	0.927	G	A	0.68129	-0.00083947	0.001389	0.54559	Genotyped	N/A	NA	NA	NA	NA	NA	NA	a	g	1.067	0.2862
1	1HPG	rs4841132	8	9221006	PPP1R3B	Manning et al. 2012	Fasting Insulin	G	A	0.87145	0.13194	0.041607	0.0015187	Imputed	0.997	G	A	0.927455	0.21877	0.094328	0.02038	Imputed	0.981	G	A	0.7883	0.029	0.084721	0.73212	Imputed	0.997	G	A	0.971603	-0.10821	0.15206	0.47667	Imputed	0.965	A	G	0.0896	-0.1116	0.06957	0.1088	a	g	-2.628	0.008579
2	1HPG	rs4841132	8	9221006	PPP1R3B	Manning et al. 2012	Fasting Insulin	G	A	0.87145	0.13465	0.041318	0.0011185	Imputed	0.997	G	A	0.927455	0.20847	0.091735	0.023057	Imputed	0.981	G	A	0.7883	0.065217	0.081635	0.42436	Imputed	0.997	G	A	0.971603	-0.13542	0.14976	0.36585	Imputed	0.965	A	G	0.0896	-0.1076	0.06678	0.1073	a	g	-2.742	0.006101
1	2HPG	rs4841132	8	9221006	PPP1R3B	Manning et al. 2012	Fasting Insulin	G	A	0.87145	0.048872	0.036336	0.17863	Imputed	0.997	G	A	0.927455	0.063135	0.075644	0.40393	Imputed	0.981	G	A	0.7883	0.1286	0.065463	0.049479	Imputed	0.997	G	A	0.971603	0.023456	0.13222	0.85919	Imputed	0.965	A	G	0.0896	-0.06374	0.0587	0.2777	a	g	-2.06	0.03943
2	2HPG	rs4841132	8	9221006	PPP1R3B	Manning et al. 2012	Fasting Insulin	G	A	0.87145	0.063005	0.035574	0.076542	Imputed	0.997	G	A	0.927455	0.060261	0.07357	0.41273	Imputed	0.981	G	A	0.7883	0.14898	0.063531	0.019025	Imputed	0.997	G	A	0.971603	-0.0075824	0.13062	0.95371	Imputed	0.965	A	G	0.0896	-0.06291	0.05678	0.268	a	g	-2.303	0.02129
1	FCP	rs4841132	8	9221006	PPP1R3B	Manning et al. 2012	Fasting Insulin	G	A	0.87118	-0.030006	0.011937	0.011949	Imputed	0.997	G	A	0.92792	-0.011201	0.01259	0.37364	Imputed	0.981	G	A	0.7883	-0.044135	0.010096	1.2343e-05	Imputed	0.997	G	A	0.971603	-0.057594	0.020836	0.0057077	Imputed	0.965	A	G	0.0896	0.02785	0.00918	0.002447	a	g	5.033	4.829e-07
2	FCP	rs4841132	8	9221006	PPP1R3B	Manning et al. 2012	Fasting Insulin	G	A	0.87118	-0.03695	0.010688	0.00054569	Imputed	0.997	G	A	0.92792	-0.017267	0.010541	0.10139	Imputed	0.981	G	A	0.7883	-0.034504	0.0080887	1.9932e-05	Imputed	0.997	G	A	0.971603	-0.06086	0.018431	0.00095971	Imputed	0.965	A	G	0.0896	0.02936	0.007537	0.0001011	a	g	6.144	8.064e-10
1	FPG	rs4841132	8	9221006	PPP1R3B	Manning et al. 2012	Fasting Insulin	G	A	0.87145	-0.0055682	0.0016956	0.0010234	Imputed	0.997	G	A	0.927455	-0.0030548	0.0025481	0.2306	Imputed	0.981	G	A	0.7883	-0.010229	0.0023092	9.4383e-06	Imputed	0.997	G	A	0.971603	-0.013065	0.0041579	0.0016764	Imputed	0.965	A	G	0.0896	0.005565	0.001917	0.003738	a	g	5.802	6.562e-09
2	FPG	rs4841132	8	9221006	PPP1R3B	Manning et al. 2012	Fasting Insulin	G	A	0.87145	-0.0061586	0.0016549	0.00019806	Imputed	0.997	G	A	0.927455	-0.0037868	0.0024065	0.11559	Imputed	0.981	G	A	0.7883	-0.0086834	0.0021135	3.9818e-05	Imputed	0.997	G	A	0.971603	-0.014024	0.0039702	0.00041194	Imputed	0.965	A	G	0.0896	0.005943	0.001749	0.0006931	a	g	6.288	3.21e-10
1	1HPG	rs515071	8	41638619	ANK1	Imamura et al. 2012	Type 2 Diabetes	G	A	0.76465	-0.053856	0.032941	0.10207	Genotyped	N/A	G	A	0.76422	-0.02725	0.058176	0.63949	Imputed	0.984	G	A	0.7754	-0.07959	0.083622	0.34121	Genotyped	N/A	G	A	0.84692	-0.02214	0.07179	0.75778	Imputed	0.94	NA	NA	NA	NA	NA	NA	a	g	1.632	0.1027
2	1HPG	rs515071	8	41638619	ANK1	Imamura et al. 2012	Type 2 Diabetes	G	A	0.76465	-0.052415	0.032716	0.10912	Genotyped	N/A	G	A	0.76422	-0.030128	0.056579	0.59439	Imputed	0.984	G	A	0.7754	-0.085481	0.080583	0.28879	Genotyped	N/A	G	A	0.84692	-0.0049266	0.070698	0.94444	Imputed	0.94	NA	NA	NA	NA	NA	NA	a	g	1.575	0.1152
1	2HPG	rs515071	8	41638619	ANK1	Imamura et al. 2012	Type 2 Diabetes	G	A	0.76465	0.011266	0.028745	0.6951	Genotyped	N/A	G	A	0.76422	-0.13491	0.046584	0.0037798	Imputed	0.984	G	A	0.7754	-0.11187	0.064655	0.083578	Genotyped	N/A	G	A	0.84692	0.026854	0.063021	0.67003	Imputed	0.94	NA	NA	NA	NA	NA	NA	a	g	1.937	0.05269
2	2HPG	rs515071	8	41638619	ANK1	Imamura et al. 2012	Type 2 Diabetes	G	A	0.76465	0.015989	0.028148	0.57002	Genotyped	N/A	G	A	0.76422	-0.13953	0.045329	0.0020826	Imputed	0.984	G	A	0.7754	-0.10549	0.062752	0.09276	Genotyped	N/A	G	A	0.84692	0.037975	0.062231	0.54172	Imputed	0.94	NA	NA	NA	NA	NA	NA	a	g	1.836	0.06637
1	FCP	rs515071	8	41638619	ANK1	Imamura et al. 2012	Type 2 Diabetes	G	A	0.7662	0.0037688	0.0094939	0.69139	Genotyped	N/A	G	A	0.76372	-0.005615	0.007727	0.46742	Imputed	0.984	G	A	0.7754	0.0018895	0.0099643	0.8496	Genotyped	N/A	G	A	0.84692	-0.0073603	0.009968	0.46028	Imputed	0.94	NA	NA	NA	NA	NA	NA	a	g	0.508	0.6114
2	FCP	rs515071	8	41638619	ANK1	Imamura et al. 2012	Type 2 Diabetes	G	A	0.7662	0.00073435	0.0084998	0.93115	Genotyped	N/A	G	A	0.76372	-0.0058204	0.0064821	0.36923	Imputed	0.984	G	A	0.7754	-0.0024019	0.0079847	0.76356	Genotyped	N/A	G	A	0.84692	-0.001915	0.0087672	0.8271	Imputed	0.94	NA	NA	NA	NA	NA	NA	a	g	0.698	0.4852
1	FPG	rs515071	8	41638619	ANK1	Imamura et al. 2012	Type 2 Diabetes	G	A	0.76465	0.0011449	0.0013427	0.39384	Genotyped	N/A	G	A	0.76422	-0.00067902	0.0015683	0.66505	Imputed	0.984	G	A	0.7754	0.00054094	0.0022779	0.81229	Genotyped	N/A	G	A	0.84692	-0.00086548	0.0019592	0.65867	Imputed	0.94	NA	NA	NA	NA	NA	NA	a	g	-0.054	0.9572
2	FPG	rs515071	8	41638619	ANK1	Imamura et al. 2012	Type 2 Diabetes	G	A	0.76465	0.00093243	0.0013105	0.47679	Genotyped	N/A	G	A	0.76422	-0.00073606	0.0014819	0.61941	Imputed	0.984	G	A	0.7754	-3.6495e-05	0.0020862	0.98604	Genotyped	N/A	G	A	0.84692	0.00013986	0.0018627	0.94015	Imputed	0.94	NA	NA	NA	NA	NA	NA	a	g	-0.106	0.9158
[truncated: 310 more rows]
[truncated: 11 more columns]

## Sheet: Suppl_Table_8
Supplementary Table 8: Associations of Genomewide Signifcant Maternal Metabolism Hits with Neonatal Anthropometric Measures
[truncated: 507 more rows]
[truncated: 9 more columns]

[truncated: 1 more sheets: Suppl_Table_9]
